# Supplementary material for: Weight shapes the intestinal microbiome in preterm infants: results of a prospective observational study
Source: BMC Microbiol. 2021 Jul 21;21:219. doi: 10.1186/s12866-021-02279-y (PMC8293572; doi:10.1186/s12866-021-02279-y)
Supplement: Supplementary file 2 — Additional file 2. [file 12866_2021_2279_MOESM2_ESM.xlsx]

## Sheet: Rep. seq. OUT, ARB & Blast
OTU	Abundance (%)	ARB-123	BLAST (double check)	Oligotype Sequence	ARB1	ARB2	Identified as
>000000465|size:564615	9.12	96.7%:StaEp124;96.7%:StaEp123	Staphylococcus epidermidis	CC-T-AC-G-G-G-A-G-GC--A-GCA-G-T-A-G-G-G-A-A--TC-TT--CC-G-C---AA-T-G-G--GC--GA-A-A--G-C--C-T-GA-C-G-G-A--GC-A--------A--C-GCC-G-C-G-T---------G-A-G--T--GA-T-G--A-A-G-G-TC----TT-CG-----------G-A-T--------C-G-T--A---AA-A-C-TC------------------------------TG-TT-A-T--T-AGG----G--A-A--G---AA-CAAA-T---G-T-G--T-A--A----------G--T---------------------AA---------------------------------C--------T-------AT-…	StaEp124	StaEp123	Staphylococcus epidermidis
>000000476|size:2104508	4.31887	97.8%:StaEp124;97.8%:StaEp123	Staphylococcus epidermidis	CC-T-AC-G-G-G-A-G-GC--A-GCA-G-T-A-G-G-G-A-A--TC-TT--CC-G-C---AA-T-G-G--GC--GA-A-A--G-C--C-T-GA-C-G-G-A--GC-A--------A--C-GCC-G-C-G-T---------G-A-G--T--GA-T-G--A-A-G-G-TC----TT-CG-----------G-A-T--------C-G-T--A---AA-A-C-TC------------------------------TG-TT-A-T--T-AGG----G--A-A--G---AA-CAAA-T---G-T-G--T-A--A----------G--T---------------------AA---------------------------------C--------T-------AT-…	StaEp124	StaEp123	Staphylococcus epidermidis
>000000694|size:451860	3.78737	97.1%:ShiFle49;96.7%:ShiSon39	Escherichia/Shigella	CC-T-AC-G-G-G-A-G-GC--A-GCA-G-T-G-G-G-G-A-A--TA-TT--GC-A-C---AA-T-G-G--GC--GC-A-A--G-C--C-T-GA-T-G-C-A--GC-C--------A--T-GCC-G-C-G-T---------G-T-A--T--GA-A-G--A-A-G-G-CC----TT-CG-----------G-G-T--------T-G-T--A---AA-G-T-AC------------------------------TT-TC-A-G--C-GGG----G--A-G--G---AA--GGG-A---G-T-A--A-A--G----------T--T---------------------AA---------------------------------T---A----C-------CT-…	ShiFle49	ShiSon39	Escherichia/Shigella
>000000487|size:271441	3.7392	96.7%:StaEp124;96.7%:StaEp123	Staphylococcus epidermidis	CC-T-AC-G-G-G-A-G-GC--A-GCA-G-T-A-G-G-G-A-A--TC-TT--CC-G-C---AA-T-G-G--GC--GA-A-A--G-C--C-T-GA-C-G-G-A--GC-A--------A--C-GCC-G-C-G-T---------G-A-G--T--GA-T-G--A-A-G-G-TC----TT-CG-----------G-A-T--------C-G-T--A---AA-A-C-TC------------------------------TG-TT-A-T--T-AGG----G--A-A--G---AA-CAAA-T---G-T-G--T-A--A----------G--T---------------------AA---------------------------------C--------T-------AT-…	StaEp124	StaEp123	Staphylococcus epidermidis
>000005650|size:214533	3.43704	96.7%:ShiSon39;96.7%:Esch1638	Escherichia/Shigella	CC-T-AC-G-G-G-A-G-GC--A-GCA-G-T-G-G-G-G-A-A--TA-TT--GC-A-C---AA-T-G-G--GC--GC-A-A--G-C--C-T-GA-T-G-C-A--GC-C--------A--T-GCC-G-C-G-T---------G-T-A--T--GA-A-G--A-A-G-G-CC----TT-CG-----------G-G-T--------T-G-T--A---AA-G-T-AC------------------------------TT-TC-A-G--C-GGG----G--A-G--G---AA--GGG-A---G-T-A--A-A--G----------T--T---------------------AA---------------------------------T---A----C-------CT-…	ShiSon39	Esch1638	Escherichia/Shigella
>000002519|size:214005	2.76098	96.7%:StaAu564;96.7%:EntFa534	Enterococcus faecalis	CC-T-AC-G-G-G-A-G-GC--A-GCA-G-T-A-G-G-G-A-A--TC-TT--CG-G-C---AA-T-G-G--AC--GA-A-A--G-T--C-T-GA-C-C-G-A--GC-A--------A--C-GCC-G-C-G-T---------G-A-G--T--GA-A-G--A-A-G-G-TT----TT-CG-----------G-A-T--------C-G-T--A---AA-A-C-TC------------------------------TG-TT-G-T--T-AGA----G--A-A--G---AA-CAAG-G---A-C-G--T-T--A----------G--T---------------------AA---------------------------------C--------T-------GA-…	StaAu564	EntFa534	Enterococcus faecalis
>000006757|size:169727	2.23606	97.8%:EnrCl498;97.8%:EnrCl489	Enterobacter cloacae	CC-T-AC-G-G-G-A-G-GC--A-GCA-G-T-G-G-G-G-A-A--TA-TT--GC-A-C---AA-T-G-G--GC--GC-A-A--G-C--C-T-GA-T-G-C-A--GC-C--------A--T-GCC-G-C-G-T---------G-T-A--T--GA-A-G--A-A-G-G-CC----TT-CG-----------G-G-T--------T-G-T--A---AA-G-T-AC------------------------------TT-TC-A-G--C-GGG----G--A-G--G---AA--GGC-G---A-C-A--G-G--G----------T--T---------------------AA---------------------------------T---A----A-------CC-…	EnrCl498	EnrCl489	Enterobacter cloacae
>000006688|size:107295	2.02557	96.7%:EnrCl498;96.7%:EnrCl489	Enterobacter cloacae	CC-T-AC-G-G-G-A-G-GC--A-GCA-G-T-G-G-G-G-A-A--TA-TT--GC-A-C---AA-T-G-G--GC--GC-A-A--G-C--C-T-GA-T-G-C-A--GC-C--------A--T-GCC-G-C-G-T---------G-T-A--T--GA-A-G--A-A-G-G-CC----TT-CG-----------G-G-T--------T-G-T--A---AA-G-T-AC------------------------------TT-TC-A-G--C-GGG----G--A-G--G---AA--GGC-G---A-C-A--G-G--G----------T--T---------------------AA---------------------------------T---A----A-------CC-…	EnrCl498	EnrCl489	Enterobacter cloacae
>000000470|size:138658	1.84917	96.7%:StaEp124;96.7%:StaEp123	Staphylococcus epidermidis	CC-T-AC-G-G-G-A-G-GC--A-GCA-G-T-A-G-G-G-A-A--TC-TT--CC-G-C---AA-T-G-G--GC--GA-A-A--G-C--C-T-GA-C-G-G-A--GC-A--------A--C-GCC-G-C-G-T---------G-A-G--T--GA-T-G--A-A-G-G-TC----TT-CG-----------G-A-T--------C-G-T--A---AA-A-C-TC------------------------------TG-TT-A-T--T-AGG----G--A-A--G---AA-CAAA-T---G-T-G--T-A--A----------G--T---------------------AA---------------------------------C--------T-------AT-…	StaEp124	StaEp123	Staphylococcus epidermidis
>000013428|size:128062	1.64114	96.9%:KleOxy31;96.7%:KleOx242	Klebsiella oxytoca	CC-T-AC-G-G-G-A-G-GC--A-GCA-G-T-G-G-G-G-A-A--TA-TT--GC-A-C---AA-T-G-G--GC--GC-A-A--G-C--C-T-GA-T-G-C-A--GC-C--------A--T-GCC-G-C-G-T---------G-T-A--T--GA-A-G--A-A-G-G-CC----TT-CG-----------G-G-T--------T-G-T--A---AA-G-T-AC------------------------------TT-TC-A-G--C-GGG----G--A-G--G---AA--GGC-G---A-T-A--A-G--G----------T--T---------------------AA---------------------------------T---A----A-------CC-…	KleOxy31	KleOx242	Klebsiella oxytoca
>000005651|size:155371	1.38772	97.8%:ShiSon39;97.8%:Esch1638	Escherichia/Shigella	CC-T-AC-G-G-G-A-G-GC--A-GCA-G-T-G-G-G-G-A-A--TA-TT--GC-A-C---AA-T-G-G--GC--GC-A-A--G-C--C-T-GA-T-G-C-A--GC-C--------A--T-GCC-G-C-G-T---------G-T-A--T--GA-A-G--A-A-G-G-CC----TT-CG-----------G-G-T--------T-G-T--A---AA-G-T-AC------------------------------TT-TC-A-G--C-GGG----G--A-G--G---AA--GGG-A---G-T-A--A-A--G----------T--T---------------------AA---------------------------------T---A----C-------CT-…	ShiSon39	Esch1638	Escherichia/Shigella
>000013427|size:125284	1.35127	96.7%:EnrCl527;96.7%:EnrCl526	Enterobacter cloacae	CC-T-AC-G-G-G-A-G-GC--A-GCA-G-T-G-G-G-G-A-A--TA-TT--GC-A-C---AA-T-G-G--GC--GC-A-A--G-C--C-T-GA-T-G-C-A--GC-C--------A--T-GCC-G-C-G-T---------G-T-A--T--GA-A-G--A-A-G-G-CC----TT-CG-----------G-G-T--------T-G-T--A---AA-G-T-AC------------------------------TT-TC-A-G--C-GGG----G--A-G--G---AA--GGC-G---A-T-A--A-G--G----------T--T---------------------AA---------------------------------T---A----A-------CC-…	EnrCl527	EnrCl526	Enterobacter cloacae
>000008038|size:73620	1.26394	96.5%:ClsPer92;96.5%:ClsPer91	Clostridium perfringens	CC-T-AC-G-G-G-A-G-GC--A-GCA-G-T-G-G-G-G-A-A--TA-TT--GC-A-C---AA-T-G-G--GG--GA-A-A--C-C--C-T-GA-T-G-C-A--GC-A--------A--C-GCC-G-C-G-T---------G-A-G--T--GA-T-G--A-A-G-G-TT----TT-CG-----------G-A-T--------C-G-T--A---AA-G-C-TC------------------------------TG-TC-T-T--T-GGG----G--A-A--G---A-------------------------------------T---------------------AA-----------------------------------------------------…	ClsPer92	ClsPer91	Clostridium perfringens
>000002525|size:58686	1.12892	97.8%:StaAu564;97.8%:EntFa534	Enterococcus faecalis	CC-T-AC-G-G-G-A-G-GC--A-GCA-G-T-A-G-G-G-A-A--TC-TT--CG-G-C---AA-T-G-G--AC--GA-A-A--G-T--C-T-GA-C-C-G-A--GC-A--------A--C-GCC-G-C-G-T---------G-A-G--T--GA-A-G--A-A-G-G-TT----TT-CG-----------G-A-T--------C-G-T--A---AA-A-C-TC------------------------------TG-TT-G-T--T-AGA----G--A-A--G---AA-CAAG-G---A-C-G--T-T--A----------G--T---------------------AA---------------------------------C--------T-------GA-…	StaAu564	EntFa534	Enterococcus faecalis
>000013461|size:87134	1.07309	97.8%:KleP1010;97.8%:KleVar41	Klebsiella pneumoniae	CC-T-AC-G-G-G-A-G-GC--A-GCA-G-T-G-G-G-G-A-A--TA-TT--GC-A-C---AA-T-G-G--GC--GC-A-A--G-C--C-T-GA-T-G-C-A--GC-C--------A--T-GCC-G-C-G-T---------G-T-G--T--GA-A-G--A-A-G-G-CC----TT-CG-----------G-G-T--------T-G-T--A---AA-G-C-AC------------------------------TT-TC-A-G--C-GGG----G--A-G--G---AA--GGC-G---A-T-A--A-G--G----------T--T---------------------AA---------------------------------T---A----A-------CC-…	KleP1010	KleVar41	Klebsiella pneumoniae
>000007385|size:86331	0.953361	96.7%:KleP1015;96.7%:KleP1009	Klebsiella pneumoniae	CC-T-AC-G-G-G-A-G-GC--A-GCA-G-T-G-G-G-G-A-A--TA-TT--GC-A-C---AA-T-G-G--GC--GC-A-A--G-C--C-T-GA-T-G-C-A--GC-C--------A--T-GCC-G-C-G-T---------G-T-G--T--GA-A-G--A-A-G-G-CC----TT-CG-----------G-G-T--------T-G-T--A---AA-G-C-AC------------------------------TT-TC-A-G--C-GGG----G--A-G--G---AA--GGC-G---G-T-G--A-G--G----------T--T---------------------AA---------------------------------T---A----A-------CC-…	KleP1015	KleP1009	Klebsiella pneumoniae
>000006690|size:75499	0.940851	96.9%:KleOxy31;96.7%:KleOx242	Klebsiella oxytoca	CC-T-AC-G-G-G-A-G-GC--A-GCA-G-T-G-G-G-G-A-A--TA-TT--GC-A-C---AA-T-G-G--GC--GC-A-A--G-C--C-T-GA-T-G-C-A--GC-C--------A--T-GCC-G-C-G-T---------G-T-A--T--GA-A-G--A-A-G-G-CC----TT-CG-----------G-G-T--------T-G-T--A---AA-G-T-AC------------------------------TT-TC-A-G--C-GGG----G--A-G--G---AA--GGC-G---A-T-A--A-G--G----------T--T---------------------AA---------------------------------T---A----A-------CC-…	KleOxy31	KleOx242	Klebsiella oxytoca
>000007724|size:272098	0.939706	96.5%:ClsPar22;96.5%:ClsPar21	Clostridium paraputrificum	CC-T-AC-G-G-G-A-G-GC--A-GCA-G-T-G-G-G-G-A-A--TA-TT--GC-A-C---AA-T-G-G--GG--GA-A-A--C-C--C-T-GA-T-G-C-A--GC-A--------A--C-GCC-G-C-G-T---------G-A-G--T--GA-T-G--A-C-G-G-CC----TT-CG-----------G-G-T--------T-G-T--A---AA-G-C-TC------------------------------TG-TC-T-T--T-GGG----G--A-C--G---A-------------------------------------T---------------------AA-----------------------------------------------------…	ClsPar22	ClsPar21	Clostridium paraputrificum
>000002164|size:52568	0.91331	97.8%:UndOligo;91.2%:BacPH120	Undibacterium oligocarboniphilum	CC-T-AC-G-G-G-A-G-GC--A-GCA-G-T-G-G-G-G-A-A--TT-TT--GG-A-C---AA-T-G-G--GG--GC-A-A--C-C--C-T-GA-T-C-C-A--GC-A--------A--T-GCC-G-C-G-T---------G-A-G--T--GA-A-G--A-A-G-G-CC----CT-CG-----------G-G-T--------T-G-T--A---AA-G-C-TC------------------------------TT-TT-G-T--C-AGG----G--A-A--G---AA--ACG-G---A-G-T--T-C--T----------C--T---------------------AA---------------------------------T---A----T-------AG-…	UndOligo	BacPH120	Undibacterium oligocarboniphilum
>000001947|size:50282	0.839845	97.8%:AciGui12;97.8%:AciGui11	Acinetobacter guillouiae/iwoffii	CC-T-AC-G-G-G-A-G-GC--A-GCA-G-T-G-G-G-G-A-A--TA-TT--GG-A-C---AA-T-G-G--GG--GG-A-A--C-C--C-T-GA-T-C-C-A--GC-C--------A--T-GCC-G-C-G-T---------G-T-G--T--GA-A-G--A-A-G-G-CC----TT-AT-----------G-G-T--------T-G-T--A---AA-G-C-AC------------------------------TT-TA-A-G--C-GAG----G--A-G--G---AG--GCT-C---T-C-T--T-G--G----------T--T---------------------AA---------------------------------T---A----C-------CC-…	AciGui12	AciGui11	Acinetobacter guillouiae/iwoffii
>000008383|size:6909	0.780722	96.5%:PpcDi105;96.5%:PpcDi102	Clostridioides difficile	CC-T-AC-G-G-G-A-G-GC--A-GCA-G-T-G-G-G-G-A-A--TA-TT--GC-A-C---AA-T-G-G--GC--GA-A-A--G-C--C-T-GA-T-G-C-A--GC-A--------A--C-GCC-G-C-G-T---------G-A-G--T--GA-T-G--A-A-G-G-CC----TT-CG-----------G-G-T--------C-G-T--A---AA-A-C-TC------------------------------TG-TC-C-T--C-AAG----G--A-A--G---A-------------------------------------T---------------------AA-----------------------------------------------------…	PpcDi105	PpcDi102	Clostridioides difficile
>000005806|size:43014	0.746316	96.7%:KleOx208;96.7%:KleOx207	Klebsiella oxytoca	CC-T-AC-G-G-G-A-G-GC--A-GCA-G-T-G-G-G-G-A-A--TA-TT--GC-A-C---AA-T-G-G--GC--GC-A-A--G-C--C-T-GA-T-G-C-A--GC-C--------A--T-GCC-G-C-G-T---------G-T-A--T--GA-A-G--A-A-G-G-CC----TT-CG-----------G-G-T--------T-G-T--A---AA-G-T-AC------------------------------TT-TC-A-G--C-GGG----G--A-G--G---AA--GGG-A---G-T-G--A-G--G----------T--T---------------------AA---------------------------------T---A----A-------CC-…	KleOx208	KleOx207	Klebsiella oxytoca
>000013426|size:63909	0.728591	96.7%:KleP1010;96.7%:KleVar41	Klebsiella pneumoniae	CC-T-AC-G-G-G-A-G-GC--A-GCA-G-T-G-G-G-G-A-A--TA-TT--GC-A-C---AA-T-G-G--GC--GC-A-A--G-C--C-T-GA-T-G-C-A--GC-C--------A--T-GCC-G-C-G-T---------G-T-G--T--GA-A-G--A-A-G-G-CC----TT-CG-----------G-G-T--------T-G-T--A---AA-G-C-AC------------------------------TT-TC-A-G--C-GGG----G--A-G--G---AA--GGC-G---A-T-A--A-G--G----------T--T---------------------AA---------------------------------T---A----A-------CC-…	KleP1010	KleVar41	Klebsiella pneumoniae
>000005658|size:46154	0.711211	96.7%:KleOx208;96.7%:KleOx207	Klebsiella oxytoca	CC-T-AC-G-G-G-A-G-GC--A-GCA-G-T-G-G-G-G-A-A--TA-TT--GC-A-C---AA-T-G-G--GC--GC-A-A--G-C--C-T-GA-T-G-C-A--GC-C--------A--T-GCC-G-C-G-T---------G-T-A--T--GA-A-G--A-A-G-G-CC----TT-CG-----------G-G-T--------T-G-T--A---AA-G-T-AC------------------------------TT-TC-A-G--C-GGG----G--A-G--G---AA--GGG-A---G-T-G--A-G--G----------T--T---------------------AA---------------------------------T---A----A-------CC-…	KleOx208	KleOx207	Klebsiella oxytoca
>000006838|size:52333	0.701688	97.8%:KleP1010;97.8%:KleVar41	Klebsiella pneumoniae	CC-T-AC-G-G-G-A-G-GC--A-GCA-G-T-G-G-G-G-A-A--TA-TT--GC-A-C---AA-T-G-G--GC--GC-A-A--G-C--C-T-GA-T-G-C-A--GC-C--------A--T-GCC-G-C-G-T---------G-T-G--T--GA-A-G--A-A-G-G-CC----TT-CG-----------G-G-T--------T-G-T--A---AA-G-C-AC------------------------------TT-TC-A-G--C-GGG----G--A-G--G---AA--GGC-G---A-T-A--A-G--G----------T--T---------------------AA---------------------------------T---A----A-------CC-…	KleP1010	KleVar41	Klebsiella pneumoniae
>000002707|size:59968	0.684744	96.7%:KleOx234;96.7%:KleOx231	Klebsiella oxytoca	CC-T-AC-G-G-G-A-G-GC--A-GCA-G-T-G-G-G-G-A-A--TA-TT--GC-A-C---AA-T-G-G--GC--GC-A-A--G-C--C-T-GA-T-G-C-A--GC-C--------A--T-GCC-G-C-G-T---------G-T-A--T--GA-A-G--A-A-G-G-CC----TT-CG-----------G-G-T--------T-G-T--A---AA-G-T-AC------------------------------TT-TC-A-G--C-GGG----G--A-G--G---AA--GGT-G---T-T-G--A-G--G----------T--T---------------------AA---------------------------------T---A----A-------CC-…	KleOx234	KleOx231	Klebsiella oxytoca
>000010372|size:54047	0.678563	97.1%:StaAu564;97.1%:EntFa534	Enterococcus faecalis	CC-T-AC-G-G-G-A-G-GC--A-GCA-G-T-A-G-G-G-A-A--TC-TT--CG-G-C---AA-T-G-G--AC--GA-A-A--G-T--C-T-GA-C-C-G-A--GC-A--------A--C-GCC-G-C-G-T---------G-A-G--T--GA-A-G--A-A-G-G-TT----TT-CG-----------G-A-T--------C-G-T--A---AA-A-C-TC------------------------------TG-TT-G-T--T-AGA----G--A-A--G---AA-CAAG-G---A-C-G--T-T--A----------G--T---------------------AA---------------------------------C--------T-------GA-…	StaAu564	EntFa534	Enterococcus faecalis
>000000857|size:36088	0.670901	96.6%:BifLon65;96.6%:BifLon64	Bifidobacterium longum subsp. Infantis	CC-T-AC-G-G-G-A-G-GC--A-GCA-G-T-G-G-G-G-A-A--TA-TT--GC-A-C---AA-T-G-G--GC--GC-A-A--G-C--C-T-GA-T-G-C-A--GC-G--------A--C-GCC-G-C-G-T---------G-A-G--G--GA-T-G--G-A-G-G-CC----TT-CG-----------G-G-T--------T-G-T--A---AA-C-C-TC------------------------------TT-TT-A-T--C-GGG----G--A-G--C---AA--G-C-------------------------------G---------------------TG---------------------------------A-------------------…	BifLon65	BifLon64	Bifidobacterium longum subsp. Infantis
>000005657|size:60241	0.668607	97.8%:KleOx208;97.8%:KleOx207	Klebsiella oxytoca	CC-T-AC-G-G-G-A-G-GC--A-GCA-G-T-G-G-G-G-A-A--TA-TT--GC-A-C---AA-T-G-G--GC--GC-A-A--G-C--C-T-GA-T-G-C-A--GC-C--------A--T-GCC-G-C-G-T---------G-T-A--T--GA-A-G--A-A-G-G-CC----TT-CG-----------G-G-T--------T-G-T--A---AA-G-T-AC------------------------------TT-TC-A-G--C-GGG----G--A-G--G---AA--GGG-A---G-T-G--A-G--G----------T--T---------------------AA---------------------------------T---A----A-------CC-…	KleOx208	KleOx207	Klebsiella oxytoca
>000002329|size:37370	0.624565	96.7%:SttSa536;96.7%:SttSa535	Streptococcus salivarius	CC-T-AC-G-G-G-A-G-GC--A-GCA-G-T-A-G-G-G-A-A--TC-TT--CG-G-C---AA-T-G-G--GG--GC-A-A--C-C--C-T-GA-C-C-G-A--GC-A--------A--C-GCC-G-C-G-T---------G-A-G--T--GA-A-G--A-A-G-G-TT----TT-CG-----------G-A-T--------C-G-T--A---AA-G-C-TC------------------------------TG-TT-G-T--A-AGT----C--A-A--G---AA-CGAG-T---G-T-G--A-G--A----------G--T---------------------GG---------------------------------A---A----A-------GT-…	SttSa536	SttSa535	Streptococcus salivarius
>000005611|size:56687	0.581618	99.8%:ShiSon39;99.8%:Esch1638	Escherichia/Shigella	CC-T-AC-G-G-G-A-G-GC--A-GCA-G-T-G-G-G-G-A-A--TA-TT--GC-A-C---AA-T-G-G--GC--GC-A-A--G-C--C-T-GA-T-G-C-A--GC-C--------A--T-GCC-G-C-G-T---------G-T-A--T--GA-A-G--A-A-G-G-CC----TT-CG-----------G-G-T--------T-G-T--A---AA-G-T-AC------------------------------TT-TC-A-G--C-GGG----G--A-G--G---AA--GGG-A---G-T-A--A-A--G----------T--T---------------------AA---------------------------------T---A----C-------CT-…	ShiSon39	Esch1638	Escherichia/Shigella
>000003098|size:24850	0.574497	97.1%:UrpUre35;97.1%:UrpUre31	Ureaplasma parvum/urealyticum	CC-T-AC-G-G-G-A-G-GC--A-GCA-G-T-A-G-G-G-A-A--TT-TT--TC-A-C---AA-T-G-G--GC--GC-A-A--G-C--C-T-TA-T-G-A-A--GC-A--------A--T-GCC-G-C-G-T---------G-A-A--C--GA-T-G--A-A-G-G-TC----TTATA-----------G-A-T--------T-G-T--A---AA-G-T-TC------------------------------TT-TT-A-T--A-TGG----G--A-A--G---AA-ACGC-T---A-A-G--A-T--AG---------G--A---------------------AA------------------------------------------------T-GA-…	UrpUre35	UrpUre31	Ureaplasma parvum/urealyticum
>000008049|size:41214	0.566996	96.5%:ClsPer92;96.5%:ClsPer91	Clostridium perfringens	CC-T-AC-G-G-G-A-G-GC--A-GCA-G-T-G-G-G-G-A-A--TA-TT--GC-A-C---AA-T-G-G--GG--GA-A-A--C-C--C-T-GA-T-G-C-A--GC-A--------A--C-GCC-G-C-G-T---------G-A-G--T--GA-T-G--A-A-G-G-TT----TT-CG-----------G-A-T--------C-G-T--A---AA-G-C-TC------------------------------TG-TC-T-T--T-GGG----G--A-A--G---A-------------------------------------T---------------------AA-----------------------------------------------------…	ClsPer92	ClsPer91	Clostridium perfringens
>000005939|size:40401	0.54144	98.0%:KleOx208;98.0%:KleOx207	Klebsiella oxytoca	CC-T-AC-G-G-G-A-G-GC--A-GCA-G-T-G-G-G-G-A-A--TA-TT--GC-A-C---AA-T-G-G--GC--GC-A-A--G-C--C-T-GA-T-G-C-A--GC-C--------A--T-GCC-G-C-G-T---------G-T-A--T--GA-A-G--A-A-G-G-CC----TT-CG-----------G-G-T--------T-G-T--A---AA-G-T-AC------------------------------TT-TC-A-G--C-GGG----G--A-G--G---AA--GGG-A---G-T-G--A-G--G----------T--T---------------------AA---------------------------------T---A----A-------CC-…	KleOx208	KleOx207	Klebsiella oxytoca
>000009229|size:28571	0.537055	96.7%:BcsFra39;96.7%:BcsFra38	Bacteroides fragilis	CC-T-AC-G-G-G-A-G-GC--A-GCA-G-T-G-A-G-G-A-A--TA-TT--GG-T-C---AA-T-G-G--GC--GC-T-A--G-C--C-T-GA-A-C-C-A--GC-C--------A--A-GTA-G-C-G-T---------G-A-A--G--GA-T-G--A-A-G-G-CT-C--TA-TG-----------G-G-T--------C-G-T--A---AA-C-T-TC------------------------------TT-TT-A-T--A-TAA----G--A-A--T---AA-AGTG-C---A-G-T--A------------------T---------------------GT---------------------------------A-------------------…	BcsFra39	BcsFra38	Bacteroides fragilis
>000003005|size:26003	0.512481	96.7%:StaWar47;96.7%:AciBa511	Staphylococcus warneri	CC-T-AC-G-G-G-A-G-GC--A-GCA-G-T-A-G-G-G-A-A--TC-TT--CC-G-C---AA-T-G-G--GC--GA-A-A--G-C--C-T-GA-C-G-G-A--GC-A--------A--C-GCC-G-C-G-T---------G-A-G--T--GA-T-G--A-A-G-G-TC----TT-CG-----------G-A-T--------C-G-T--A---AA-A-C-TC------------------------------TG-TT-A-T--C-AGG----G--A-A--G---AA-CAAA-T---G-T-G--T-A--A----------G--T---------------------AA---------------------------------C--------T-------GT-…	StaWar47	AciBa511	Staphylococcus warneri
>000014963|size:39743	0.50436	97.1%:StaEp124;97.1%:StaEp123	Staphylococcus epidermidis	CC-T-AC-G-G-G-A-G-GC--A-GCA-G-T-A-G-G-G-A-A--TC-TT--CC-G-C---AA-T-G-G--GC--GA-A-A--G-C--C-T-GA-C-G-G-A--GC-A--------A--C-GCC-G-C-G-T---------G-A-G--T--GA-T-G--A-A-G-G-TC----TT-CG-----------G-A-T--------C-G-T--A---AA-A-C-TC------------------------------TG-TT-A-T--T-AGG----G--A-A--G---AA-CAAA-T---G-T-G--T-A--A----------G--T---------------------AA---------------------------------C--------T-------AT-…	StaEp124	StaEp123	Staphylococcus epidermidis
>000001662|size:40123	0.501062	97.8%:StaHae56;97.8%:StaEpi93	Staphylococcus haemolyticus	CC-T-AC-G-G-G-A-G-GC--A-GCA-G-T-A-G-G-G-A-A--TC-TT--CC-G-C---AA-T-G-G--GC--GA-A-A--G-C--C-T-GA-C-G-G-A--GC-A--------A--C-GCC-G-C-G-T---------G-A-G--T--GA-T-G--A-A-G-G-TC----TT-CG-----------G-A-T--------C-G-T--A---AA-A-C-TC------------------------------TG-TT-A-T--T-AGG----G--A-A--G---AA-CATA-C---G-T-G--T-A--A----------G--T---------------------AA---------------------------------C--------T-------AT-…	StaHae56	StaEpi93	Staphylococcus haemolyticus
>000006957|size:42128	0.49805	96.7%:BcsDor17;96.7%:BcsDor16	Bacteroides dorei	CC-T-AC-G-G-G-A-G-GC--A-GCA-G-T-G-A-G-G-A-A--TA-TT--GG-T-C---AA-T-G-G--GC--GA-T-G--G-C--C-T-GA-A-C-C-A--GC-C--------A--A-GTA-G-C-G-T---------G-A-A--G--GA-T-G--A-C-T-G-CC-C--TA-TG-----------G-G-T--------T-G-T--A---AA-C-T-TC------------------------------TT-TT-A-T--A-AAG----G--A-A--T---AA-AGTC-G---G-G-T--A------------------T---------------------GC---------------------------------A-------------------…	BcsDor17	BcsDor16	Bacteroides dorei
>000002702|size:33946	0.493097	96.7%:EnrCl486;96.7%:EnrCl470	Enterobacter cloacae	CC-T-AC-G-G-G-A-G-GC--A-GCA-G-T-G-G-G-G-A-A--TA-TT--GC-A-C---AA-T-G-G--GC--GC-A-A--G-C--C-T-GA-T-G-C-A--GC-C--------A--T-GCC-G-C-G-T---------G-T-A--T--GA-A-G--A-A-G-G-CC----TT-CG-----------G-G-T--------T-G-T--A---AA-G-T-AC------------------------------TT-TC-A-G--C-GGG----G--A-G--G---AA--GGT-G---C-T-G--A-G--G----------T--T---------------------AA---------------------------------T---A----A-------CC-…	EnrCl486	EnrCl470	Enterobacter cloacae
>000002182|size:21846	0.467589	96.7%:UndOligo;90.1%:BacPH120	Undibacterium oligocarboniphilum	CC-T-AC-G-G-G-A-G-GC--A-GCA-G-T-G-G-G-G-A-A--TT-TT--GG-A-C---AA-T-G-G--GG--GC-A-A--C-C--C-T-GA-T-C-C-A--GC-A--------A--T-GCC-G-C-G-T---------G-A-G--T--GA-A-G--A-A-G-G-CC----CT-CG-----------G-G-T--------T-G-T--A---AA-G-C-TC------------------------------TT-TT-G-T--C-AGG----G--A-A--G---AA--ACG-G---A-G-T--T-C--T----------C--T---------------------AA---------------------------------T---A----T-------AG-…	UndOligo	BacPH120	Undibacterium oligocarboniphilum
>000006375|size:33226	0.46687	97.1%:EnrCl527;97.1%:EnrCl526	Enterobacter cloacae	CC-T-AC-G-G-G-A-G-GC--A-GCA-G-T-G-G-G-G-A-A--TA-TT--GC-A-C---AA-T-G-G--GC--GC-A-A--G-C--C-T-GA-T-G-C-A--GC-C--------A--T-GCC-G-C-G-T---------G-T-A--T--GA-A-G--A-A-G-G-CC----TT-CG-----------G-G-T--------T-G-T--A---AA-G-T-AC------------------------------TT-TC-A-G--C-GGG----G--A-G--G---AA--GGC-G---A-T-A--A-G--G----------T--T---------------------AA---------------------------------T---A----A-------CC-…	EnrCl527	EnrCl526	Enterobacter cloacae
>000013405|size:38071	0.458785	96.7%:EnrCl498;96.7%:EnrCl489	Enterobacter cloacae	CC-T-AC-G-G-G-A-G-GC--A-GCA-G-T-G-G-G-G-A-A--TA-TT--GC-A-C---AA-T-G-G--GC--GC-A-A--G-C--C-T-GA-T-G-C-A--GC-C--------A--T-GCC-G-C-G-T---------G-T-A--T--GA-A-G--A-A-G-G-CC----TT-CG-----------G-G-T--------T-G-T--A---AA-G-T-AC------------------------------TT-TC-A-G--C-GGG----G--A-G--G---AA--GGC-G---A-C-A--G-G--G----------T--T---------------------AA---------------------------------T---A----A-------CC-…	EnrCl498	EnrCl489	Enterobacter cloacae
>000006376|size:37414	0.457067	99.8%:EnrCl527;99.8%:EnrCl526	Enterobacter cloacae	CC-T-AC-G-G-G-A-G-GC--A-GCA-G-T-G-G-G-G-A-A--TA-TT--GC-A-C---AA-T-G-G--GC--GC-A-A--G-C--C-T-GA-T-G-C-A--GC-C--------A--T-GCC-G-C-G-T---------G-T-A--T--GA-A-G--A-A-G-G-CC----TT-CG-----------G-G-T--------T-G-T--A---AA-G-T-AC------------------------------TT-TC-A-G--C-GGG----G--A-G--G---AA--GGC-G---A-T-A--A-G--G----------T--T---------------------AA---------------------------------T---A----A-------CC-…	EnrCl527	EnrCl526	Enterobacter cloacae
>000006249|size:34029	0.454436	97.7%:BifLon65;97.7%:BifLon64	Bifidobacterium longum subsp. Infantis	CC-T-AC-G-G-G-A-G-GC--A-GCA-G-T-G-G-G-G-A-A--TA-TT--GC-A-C---AA-T-G-G--GC--GC-A-A--G-C--C-T-GA-T-G-C-A--GC-G--------A--C-GCC-G-C-G-T---------G-A-G--G--GA-T-G--G-A-G-G-CC----TT-CG-----------G-G-T--------T-G-T--A---AA-C-C-TC------------------------------TT-TT-A-T--C-GGG----G--A-G--C---AA--G-C-------------------------------G---------------------TG---------------------------------A-------------------…	BifLon65	BifLon64	Bifidobacterium longum subsp. Infantis
>000002082|size:31536	0.430583	96.7%:SttAng69;96.7%:SttAng68	Streptococcus anginosus	CC-T-AC-G-G-G-A-G-GC--A-GCA-G-T-A-G-G-G-A-A--TC-TT--CG-G-C---AA-T-G-G--GG--GG-A-A--C-C--C-T-GA-C-C-G-A--GC-A--------A--C-GCC-G-C-G-T---------G-A-G--T--GA-A-G--A-A-G-G-TT----TT-CG-----------G-A-T--------C-G-T--A---AA-G-C-TC------------------------------TG-TT-G-T--T-AAG----G--A-A--G---AA-CGAG-T---G-T-G--A-G--A----------A--T---------------------GG---------------------------------A---A----A-------GT-…	SttAng69	SttAng68	Streptococcus anginosus
>000002516|size:42581	0.421623	96.7%:StaAu564;96.7%:EntFa534	Enterococcus faecalis	CC-T-AC-G-G-G-A-G-GC--A-GCA-G-T-A-G-G-G-A-A--TC-TT--CG-G-C---AA-T-G-G--AC--GA-A-A--G-T--C-T-GA-C-C-G-A--GC-A--------A--C-GCC-G-C-G-T---------G-A-G--T--GA-A-G--A-A-G-G-TT----TT-CG-----------G-A-T--------C-G-T--A---AA-A-C-TC------------------------------TG-TT-G-T--T-AGA----G--A-A--G---AA-CAAG-G---A-C-G--T-T--A----------G--T---------------------AA---------------------------------C--------T-------GA-…	StaAu564	EntFa534	Enterococcus faecalis
>000002153|size:21288	0.410868	96.7%:UndOligo;90.1%:BacPH120	Undibacterium oligocarboniphilum	CC-T-AC-G-G-G-A-G-GC--A-GCA-G-T-G-G-G-G-A-A--TT-TT--GG-A-C---AA-T-G-G--GG--GC-A-A--C-C--C-T-GA-T-C-C-A--GC-A--------A--T-GCC-G-C-G-T---------G-A-G--T--GA-A-G--A-A-G-G-CC----CT-CG-----------G-G-T--------T-G-T--A---AA-G-C-TC------------------------------TT-TT-G-T--C-AGG----G--A-A--G---AA--ACG-G---A-G-T--T-C--T----------C--T---------------------AA---------------------------------T---A----T-------AG-…	UndOligo	BacPH120	Undibacterium oligocarboniphilum
>000005655|size:25907	0.40704	96.7%:KleOx239;96.7%:KleOx235	Klebsiella oxytoca	CC-T-AC-G-G-G-A-G-GC--A-GCA-G-T-G-G-G-G-A-A--TA-TT--GC-A-C---AA-T-G-G--GC--GC-A-A--G-C--C-T-GA-T-G-C-A--GC-C--------A--T-GCC-G-C-G-T---------G-T-A--T--GA-A-G--A-A-G-G-CC----TT-CG-----------G-G-T--------T-G-T--A---AA-G-T-AC------------------------------TT-TC-A-G--C-GGG----G--A-G--G---AA--GGG-A---G-T-G--A-G--G----------T--T---------------------AA---------------------------------T---A----A-------CC-…	KleOx239	KleOx235	Klebsiella oxytoca
>000002554|size:19634	0.404933	97.8%:StaAu564;97.8%:EntFa534	Enterococcus faecalis	C--T-AC-G-G-G-A-G-GC--A-GCA-G-T-A-G-G-G-A-A--TC-TT--CG-G-C---AA-T-G-G--AC--GA-A-A--G-T--C-T-GA-C-C-G-A--GC-A--------A--C-GCC-G-C-G-T---------G-A-G--T--GA-A-G--A-A-G-G-TT----TT-CG-----------G-A-T--------C-G-T--A---AA-A-C-TC------------------------------TG-TT-G-T--T-AGA----G--A-A--G---AA-CAAG-G---A-C-G--T-T--A----------G--T---------------------AA---------------------------------C--------T-------GA-…	StaAu564	EntFa534	Enterococcus faecalis
>000013429|size:49280	0.373722	96.7%:RaoOrn60;96.7%:RaoOrn59	Raoultella ornithinolytica	CC-T-AC-G-G-G-A-G-GC--A-GCA-G-T-G-G-G-G-A-A--TA-TT--GC-A-C---AA-T-G-G--GC--GC-A-A--G-C--C-T-GA-T-G-C-A--GC-C--------A--T-GCC-G-C-G-T---------G-T-A--T--GA-A-G--A-A-G-G-CC----TT-CG-----------G-G-T--------T-G-T--A---AA-G-T-AC------------------------------TT-TC-A-G--C-GAG----G--A-G--G---AA--GGC-G---A-T-A--A-G--G----------T--T---------------------AA---------------------------------T---A----A-------CC-…	RaoOrn60	RaoOrn59	Raoultella ornithinolytica
>000007209|size:20453	0.368424	96.7%:KleP1015;96.7%:KleP1009	Klebsiella pneumoniae	CC-T-AC-G-G-G-A-G-GC--A-GCA-G-T-G-G-G-G-A-A--TA-TT--GC-A-C---AA-T-G-G--GC--GC-A-A--G-C--C-T-GA-T-G-C-A--GC-C--------A--T-GCC-G-C-G-T---------G-T-G--T--GA-A-G--A-A-G-G-CC----TT-CG-----------G-G-T--------T-G-T--A---AA-G-C-AC------------------------------TT-TC-A-G--C-GGG----G--A-G--G---AA--GGC-G---G-T-G--A-G--G----------T--T---------------------AA---------------------------------T---A----A-------CC-…	KleP1015	KleP1009	Klebsiella pneumoniae
>000004766|size:26185	0.36759	99.8%:StaEp124;99.8%:StaEp123	Staphylococcus epidermidis	CC-T-AC-G-G-G-A-G-GC--A-GCA-G-T-A-G-G-G-A-A--TC-TT--CC-G-C---AA-T-G-G--GC--GA-A-A--G-C--C-T-GA-C-G-G-A--GC-A--------A--C-GCC-G-C-G-T---------G-A-G--T--GA-T-G--A-A-G-G-TC----TT-CG-----------G-A-T--------C-G-T--A---AA-A-C-TC------------------------------TG-TT-A-T--T-AGG----G--A-A--G---AA-CAAA-T---G-T-G--T-A--A----------G--T---------------------AA---------------------------------C--------T-------AT-…	StaEp124	StaEp123	Staphylococcus epidermidis
>000007386|size:29555	0.364313	97.8%:KleP1015;97.8%:KleP1009	Klebsiella pneumoniae	CC-T-AC-G-G-G-A-G-GC--A-GCA-G-T-G-G-G-G-A-A--TA-TT--GC-A-C---AA-T-G-G--GC--GC-A-A--G-C--C-T-GA-T-G-C-A--GC-C--------A--T-GCC-G-C-G-T---------G-T-G--T--GA-A-G--A-A-G-G-CC----TT-CG-----------G-G-T--------T-G-T--A---AA-G-C-AC------------------------------TT-TC-A-G--C-GGG----G--A-G--G---AA--GGC-G---G-T-G--A-G--G----------T--T---------------------AA---------------------------------T---A----A-------CC-…	KleP1015	KleP1009	Klebsiella pneumoniae
>000008735|size:20875	0.362141	96.5%:ClsTert4;96.5%:ClsTert3	Clostridium tertium	CC-T-AC-G-G-G-A-G-GC--A-GCA-G-T-G-G-G-G-A-A--TA-TT--GC-A-C---AA-T-G-G--GG--GA-A-A--C-C--C-T-GA-T-G-C-A--GC-A--------A--C-GCC-G-C-G-T---------G-A-G--T--GA-T-G--A-A-G-G-TT----TT-CG-----------G-A-T--------C-G-T--A---AA-G-C-TC------------------------------TG-TC-T-T--C-AGG----G--A-C--G---A-------------------------------------T---------------------AA-----------------------------------------------------…	ClsTert4	ClsTert3	Clostridium tertium
>000001739|size:108251	0.34341	97.8%:BcsFra39;97.8%:BcsFra38	Bacteroides fragilis	CC-T-AC-G-G-G-A-G-GC--A-GCA-G-T-G-A-G-G-A-A--TA-TT--GG-T-C---AA-T-G-G--GC--GC-T-A--G-C--C-T-GA-A-C-C-A--GC-C--------A--A-GTA-G-C-G-T---------G-A-A--G--GA-T-G--A-A-G-G-CT-C--TA-TG-----------G-G-T--------C-G-T--A---AA-C-T-TC------------------------------TT-TT-A-T--A-TAA----G--A-A--T---AA-AGTG-C---A-G-T--A------------------T---------------------GT---------------------------------A-------------------…	BcsFra39	BcsFra38	Bacteroides fragilis
>000013312|size:20323	0.343045	96.7%:EnrCl527;96.7%:EnrCl526	Enterobacter cloacae	CC-T-AC-G-G-G-A-G-GC--A-GCA-G-T-G-G-G-G-A-A--TA-TT--GC-A-C---AA-T-G-G--GC--GC-A-A--G-C--C-T-GA-T-G-C-A--GC-C--------A--T-GCC-G-C-G-T---------G-T-A--T--GA-A-G--A-A-G-G-CC----TT-CG-----------G-G-T--------T-G-T--A---AA-G-T-AC------------------------------TT-TC-A-G--C-GGG----G--A-G--G---AA--GGC-G---A-T-A--A-G--G----------T--T---------------------AA---------------------------------T---A----A-------CC-…	EnrCl527	EnrCl526	Enterobacter cloacae
>000000867|size:29025	0.338942	96.6%:BifScar6;96.6%:BifScar5	Bifidobacterium scardovii	CC-T-AC-G-G-G-A-G-GC--A-GCA-G-T-G-G-G-G-A-A--TA-TT--GC-A-C---AA-T-G-G--GC--GC-A-A--G-C--C-T-GA-T-G-C-A--GC-G--------A--C-GCC-G-C-G-T---------G-A-G--G--GA-T-G--G-A-G-G-CC----TT-CG-----------G-G-T--------T-G-T--A---AA-C-C-TC------------------------------TT-TT-A-G--C-AGG----G--A-G--C---AA-GG-C-------------------------------T---------------------TC---------------------------------G-------------------…	BifScar6	BifScar5	Bifidobacterium scardovii
>000006140|size:27911	0.33787	96.7%:KleOx209;96.7%:KleOx142	Klebsiella oxytoca	CC-T-AC-G-G-G-A-G-GC--A-GCA-G-T-G-G-G-G-A-A--TA-TT--GC-A-C---AA-T-G-G--GC--GC-A-A--G-C--C-T-GA-T-G-C-A--GC-C--------A--T-GCC-G-C-G-T---------G-T-A--T--GA-A-G--A-A-G-G-CC----TT-CG-----------G-G-T--------T-G-T--A---AA-G-T-AC------------------------------TT-TC-A-G--C-GGG----G--A-G--G---AA--GGG-A---G-T-A--A-G--G----------T--T---------------------AA---------------------------------T---A----A-------CC-…	KleOx209	KleOx142	Klebsiella oxytoca
>000007716|size:28216	0.332052	97.9%:ClsPar22;97.9%:ClsPar21	Clostridium paraputrificum	CC-T-AC-G-G-G-A-G-GC--A-GCA-G-T-G-G-G-G-A-A--TA-TT--GC-A-C---AA-T-G-G--GG--GA-A-A--C-C--C-T-GA-T-G-C-A--GC-A--------A--C-GCC-G-C-G-T---------G-A-G--T--GA-T-G--A-C-G-G-CC----TT-CG-----------G-G-T--------T-G-T--A---AA-G-C-TC------------------------------TG-TC-T-T--T-GGG----G--A-C--G---A-------------------------------------T---------------------AA-----------------------------------------------------…	ClsPar22	ClsPar21	Clostridium paraputrificum
>000005608|size:38134	0.323504	96.7%:ShiSon39;96.7%:Esch1638	Escherichia/Shigella	CC-T-AC-G-G-G-A-G-GC--A-GCA-G-T-G-G-G-G-A-A--TA-TT--GC-A-C---AA-T-G-G--GC--GC-A-A--G-C--C-T-GA-T-G-C-A--GC-C--------A--T-GCC-G-C-G-T---------G-T-A--T--GA-A-G--A-A-G-G-CC----TT-CG-----------G-G-T--------T-G-T--A---AA-G-T-AC------------------------------TT-TC-A-G--C-GGG----G--A-G--G---AA--GGG-A---G-T-A--A-A--G----------T--T---------------------AA---------------------------------T---A----C-------CT-…	ShiSon39	Esch1638	Escherichia/Shigella
>000014929|size:15281	0.319241	96.7%:StaAu564;96.7%:EntFa534	Enterococcus faecalis	CC-T-AC-G-G-G-A-G-GC--A-GCA-G-T-A-G-G-G-A-A--TC-TT--CG-G-C---AA-T-G-G--AC--GA-A-A--G-T--C-T-GA-C-C-G-A--GC-A--------A--C-GCC-G-C-G-T---------G-A-G--T--GA-A-G--A-A-G-G-TT----TT-CG-----------G-A-T--------C-G-T--A---AA-A-C-TC------------------------------TG-TT-G-T--T-AGA----G--A-A--G---AA-CAAG-G---A-C-G--T-T--A----------G--T---------------------AA---------------------------------C--------T-------GA-…	StaAu564	EntFa534	Enterococcus faecalis
>000010450|size:2484	0.317242	95.2%:StaAu564;95.2%:EntFa534	Enterococcus faecalis	CC-T-AC-G-G-G-A-G-GC--A-GCA-G-T-A-G-G-G-A-A--TC-TT--CG-G-C---AA-T-G-G--AC--GA-A-A--G-T--C-T-GA-C-C-G-A--GC-A--------A--C-GCC-G-C-G-T---------G-A-G--T--GA-A-G--A-A-G-G-TT----TT-CG-----------G-A-T--------C-G-T--A---AA-A-C-TC------------------------------TG-TT-G-T--T-AGA----G--A-A--G---AA-CAAG-G---A-C-G--T-T--A----------G--T---------------------AA---------------------------------C--------T-------GA-…	StaAu564	EntFa534	Enterococcus faecalis
>000007038|size:22795	0.309341	99.8%:KleP1015;99.8%:KleP1009	Klebsiella pneumoniae	CC-T-AC-G-G-G-A-G-GC--A-GCA-G-T-G-G-G-G-A-A--TA-TT--GC-A-C---AA-T-G-G--GC--GC-A-A--G-C--C-T-GA-T-G-C-A--GC-C--------A--T-GCC-G-C-G-T---------G-T-G--T--GA-A-G--A-A-G-G-CC----TT-CG-----------G-G-T--------T-G-T--A---AA-G-C-AC------------------------------TT-TC-A-G--C-GGG----G--A-G--G---AA--GGC-G---G-T-G--A-G--G----------T--T---------------------AA---------------------------------T---A----A-------CC-…	KleP1015	KleP1009	Klebsiella pneumoniae
>000006547|size:23249	0.304372	96.7%:KleP1015;96.7%:KleP1009	Klebsiella pneumoniae	CC-T-AC-G-G-G-A-G-GC--A-GCA-G-T-G-G-G-G-A-A--TA-TT--GC-A-C---AA-T-G-G--GC--GC-A-A--G-C--C-T-GA-T-G-C-A--GC-C--------A--T-GCC-G-C-G-T---------G-T-G--T--GA-A-G--A-A-G-G-CC----TT-CG-----------G-G-T--------T-G-T--A---AA-G-C-AC------------------------------TT-TC-A-G--C-GGG----G--A-G--G---AA--GGC-G---G-T-G--A-G--G----------T--T---------------------AA---------------------------------T---A----A-------CC-…	KleP1015	KleP1009	Klebsiella pneumoniae
>000006474|size:22422	0.298756	97.1%:KleP1002;97.1%:KlePn925	Klebsiella pneumoniae	CC-T-AC-G-G-G-A-G-GC--A-GCA-G-T-G-G-G-G-A-A--TA-TT--GC-A-C---AA-T-G-G--GC--GC-A-A--G-C--C-T-GA-T-G-C-A--GC-C--------A--T-GCC-G-C-G-T---------G-T-G--T--GA-A-G--A-A-G-G-CC----TT-CG-----------G-G-T--------T-G-T--A---AA-G-C-AC------------------------------TT-TC-A-G--C-GGG----G--A-G--G---AA--GGC-G---A-T-A--A-G--G----------T--T---------------------AA---------------------------------T---A----A-------CC-…	KleP1002	KlePn925	Klebsiella pneumoniae
>000002199|size:14994	0.297771	95.2%:CrvLanc2;95.2%:CrvLance	Curvibacter lanceolatus	CC-T-AC-G-G-G-A-G-GC--A-GCA-G-T-G-G-G-G-A-A--TT-TT--GG-A-C---AA-T-G-G--GC--GA-A-A--G-C--C-T-GA-T-C-C-A--GC-C--------A--T-GCC-G-C-G-T---------G-C-A--G--GA-T-G--A-A-G-G-CC----TT-CG-----------G-G-T--------T-G-T--A---AA-C-T-GC------------------------------TT-TT-G-T--A-CGG----A--A-C--G---AA--AAG-G---T-T-T--G-G--C----------C--T---------------------AA---------------------------------T---A----A-------GC-…	CrvLanc2	CrvLance	Curvibacter lanceolatus
>000006331|size:14326	0.280286	96.7%:KleP1010;96.7%:KleVar41	Klebsiella pneumoniae	CC-T-AC-G-G-G-A-G-GC--A-GCA-G-T-G-G-G-G-A-A--TA-TT--GC-A-C---AA-T-G-G--GC--GC-A-A--G-C--C-T-GA-T-G-C-A--GC-C--------A--T-GCC-G-C-G-T---------G-T-G--T--GA-A-G--A-A-G-G-CC----TT-CG-----------G-G-T--------T-G-T--A---AA-G-C-AC------------------------------TT-TC-A-G--C-GGG----G--A-G--G---AA--GGC-G---A-T-A--A-G--G----------T--T---------------------AA---------------------------------T---A----A-------CC-…	KleP1010	KleVar41	Klebsiella pneumoniae
>000010919|size:7318	0.277836	96.7%:EnrCl486;96.7%:EnrCl470	Enterobacter cloacae	CC-T-AC-G-G-G-A-G-GC--A-GCA-G-T-G-G-G-G-A-A--TA-TT--GC-A-C---AA-T-G-G--GC--GC-A-A--G-C--C-T-GA-T-G-C-A--GC-C--------A--T-GCC-G-C-G-T---------G-T-A--T--GA-A-G--A-A-G-G-CC----TT-CG-----------G-G-T--------T-G-T--A---AA-G-T-AC------------------------------TT-TC-A-G--C-GGG----G--A-G--G---AA--GGT-G---C-T-G--A-G--G----------T--T---------------------AA---------------------------------T---A----A-------CC-…	EnrCl486	EnrCl470	Enterobacter cloacae
>000001545|size:25540	0.275377	96.6%:CorPse92;96.6%:CorPse91	Corynebacterium tuberculostearicum	CC-T-AC-G-G-G-A-G-GC--A-GCA-G-T-G-G-G-G-A-A--TA-TT--GC-A-C---AA-T-G-G--GC--GC-A-A--G-C--C-T-GA-T-G-C-A--GC-G--------A--C-GCC-G-C-G-T---------G-G-G--G--GA-T-G--A-C-G-G-CC----TT-CG-----------G-G-T--------T-G-T--A---AA-C-T-CC------------------------------TT-TC-G-C--T-AGG----G--A-C--G---AA--G-C-T-----------------------------T---------------------TT-----------------------------------------------------…	CorPse92	CorPse91	Corynebacterium tuberculostearicum
>000002171|size:10956	0.267066	94.1%:CrvLanc2;94.1%:CrvLance	Curvibacter lanceolatus	CC-T-AC-G-G-G-A-G-GC--A-GCA-G-T-G-G-G-G-A-A--TT-TT--GG-A-C---AA-T-G-G--GC--GA-A-A--G-C--C-T-GA-T-C-C-A--GC-C--------A--T-GCC-G-C-G-T---------G-C-A--G--GA-T-G--A-A-G-G-CC----TT-CG-----------G-G-T--------T-G-T--A---AA-C-T-GC------------------------------TT-TT-G-T--A-CGG----A--A-C--G---AA--AAG-G---T-T-T--G-G--C----------C--T---------------------AA---------------------------------T---A----A-------GC-…	CrvLanc2	CrvLance	Curvibacter lanceolatus
>000003522|size:13093	0.264983	96.6%:BifDen14;96.6%:BifDent2	Bifidobacterium dentium	CC-T-AC-G-G-G-A-G-GC--A-GCA-G-T-G-G-G-G-A-A--TA-TT--GC-A-C---AA-T-G-G--GC--GC-A-A--G-C--C-T-GA-T-G-C-A--GC-G--------A--C-GCC-G-C-G-T---------G-C-G--G--GA-T-G--G-A-G-G-CC----TT-CG-----------G-G-T--------T-G-T--A---AA-C-C-GC------------------------------TT-TT-G-A--T-CGG----G--A-G--C---AA--GCC-C-----------------------------T---------------------TC---------------------------------G-------------------…	BifDen14	BifDent2	Bifidobacterium dentium
>000008043|size:23771	0.262276	97.7%:ClsPer92;97.7%:ClsPer91	Clostridium perfringens	CC-T-AC-G-G-G-A-G-GC--A-GCA-G-T-G-G-G-G-A-A--TA-TT--GC-A-C---AA-T-G-G--GG--GA-A-A--C-C--C-T-GA-T-G-C-A--GC-A--------A--C-GCC-G-C-G-T---------G-A-G--T--GA-T-G--A-A-G-G-TT----TT-CG-----------G-A-T--------C-G-T--A---AA-G-C-TC------------------------------TG-TC-T-T--T-GGG----G--A-A--G---A-------------------------------------T---------------------AA-----------------------------------------------------…	ClsPer92	ClsPer91	Clostridium perfringens
>000012881|size:15925	0.254141	96.7%:EnrCl527;96.7%:EnrCl526	Enterobacter cloacae	CC-T-AC-G-G-G-A-G-GC--A-GCA-G-T-G-G-G-G-A-A--TA-TT--GC-A-C---AA-T-G-G--GC--GC-A-A--G-C--C-T-GA-T-G-C-A--GC-C--------A--T-GCC-G-C-G-T---------G-T-A--T--GA-A-G--A-A-G-G-CC----TT-CG-----------G-G-T--------T-G-T--A---AA-G-T-AC------------------------------TT-TC-A-G--C-GGG----G--A-G--G---AA--GGC-G---A-T-A--A-G--G----------T--T---------------------AA---------------------------------T---A----A-------CC-…	EnrCl527	EnrCl526	Enterobacter cloacae
>000015155|size:22843	0.25089	96.7%:StaEp124;96.7%:StaEp123	Staphylococcus epidermidis	CC-T-AC-G-G-G-A-G-GC--A-GCA-G-T-A-G-G-G-A-A--TC-TT--CC-G-C---AA-T-G-G--GC--GA-A-A--G-C--C-T-GA-C-G-G-A--GC-A--------A--C-GCC-G-C-G-T---------G-A-G--T--GA-T-G--A-A-G-G-TC----TT-CG-----------G-A-T--------C-G-T--A---AA-A-C-TC------------------------------TG-TT-A-T--T-AGG----G--A-A--G---AA-CAAA-T---G-T-G--T-A--A----------G--T---------------------AA---------------------------------C--------T-------AT-…	StaEp124	StaEp123	Staphylococcus epidermidis
>000000859|size:10838	0.248242	96.6%:BifScar6;96.6%:BifScar5	Bifidobacterium scardovii	CC-T-AC-G-G-G-A-G-GC--A-GCA-G-T-G-G-G-G-A-A--TA-TT--GC-A-C---AA-T-G-G--GC--GC-A-A--G-C--C-T-GA-T-G-C-A--GC-G--------A--C-GCC-G-C-G-T---------G-A-G--G--GA-T-G--G-A-G-G-CC----TT-CG-----------G-G-T--------T-G-T--A---AA-C-C-TC------------------------------TT-TT-A-G--C-AGG----G--A-G--C---AA-GG-C-------------------------------T---------------------TC---------------------------------G-------------------…	BifScar6	BifScar5	Bifidobacterium scardovii
>000001189|size:17600	0.247663	96.7%:CtbFr155;96.7%:CtbFr143	Citrobacter freundii	CC-T-AC-G-G-G-A-G-GC--A-GCA-G-T-G-G-G-G-A-A--TA-TT--GC-A-C---AA-T-G-G--GC--GC-A-A--G-C--C-T-GA-T-G-C-A--GC-C--------A--T-GCC-G-C-G-T---------G-T-A--T--GA-A-G--A-A-G-G-CC----TT-CG-----------G-G-T--------T-G-T--A---AA-G-T-AC------------------------------TT-TC-A-G--C-GAG----G--A-G--G---AA--GGC-G---T-T-G--T-G--G----------T--T---------------------AA---------------------------------T---A----A-------CC-…	CtbFr155	CtbFr143	Citrobacter freundii
>000006922|size:17869	0.237452	96.7%:PntEuca4;96.7%:PntAgg53	Pantoea agglomerans	CC-T-AC-G-G-G-A-G-GC--A-GCA-G-T-G-G-G-G-A-A--TA-TT--GC-A-C---AA-T-G-G--GC--GC-A-A--G-C--C-T-GA-T-G-C-A--GC-C--------A--T-GCC-G-C-G-T---------G-T-A--T--GA-A-G--A-A-G-G-CC----TT-CG-----------G-G-T--------T-G-T--A---AA-G-T-AC------------------------------TT-TC-A-G--C-GGG----G--A-G--G---AA--GGC-G---A-T-G--T-G--G----------T--T---------------------AA---------------------------------T---A----A-------CC-…	PntEuca4	PntAgg53	Pantoea agglomerans
>000005092|size:14840	0.23525	98.0%:StaEpi99;98.0%:StaEpi80	Staphylococcus epidermidis	CC-T-AC-G-G-G-A-G-GC--A-GCA-G-T-A-G-G-G-A-A--TC-TT--CC-G-C---AA-T-G-G--GC--GA-A-A--G-C--T-T-GA-C-G-G-A--GC-A--------A--C-GCC-G-C-G-T---------G-A-G--T--GA-T-G--A-A-G-G-TC----TT-CG-----------G-A-T--------C-G-T--A---AA-A-C-TC------------------------------TG-TT-A-T--T-AGG----G--A-A--G---AA-CAAA-T---G-T-G--T-A--A----------G--T---------------------AA---------------------------------C--------T-------AT-…	StaEpi99	StaEpi80	Staphylococcus epidermidis
>000011158|size:18721	0.23422	96.7%:StaAu565;96.7%:StaAu563	Staphylococcus aureus	CC-T-AC-G-G-G-A-G-GC--A-GCA-G-T-A-G-G-G-A-A--TC-TT--CC-G-C---AA-T-G-G--GC--GA-A-A--G-C--C-T-GA-C-G-G-A--GC-A--------A--C-GCC-G-C-G-T---------G-A-G--T--GA-T-G--A-A-G-G-TC----TT-CG-----------G-A-T--------C-G-T--A---AA-A-C-TC------------------------------TG-TT-A-T--T-AGG----G--A-A--G---AA-CATA-T---G-T-G--T-A--A----------G--T---------------------AA---------------------------------C--------T-------GT-…	StaAu565	StaAu563	Staphylococcus aureus
>000013460|size:20103	0.230294	97.8%:KleOx242;97.8%:KleOx241	Klebsiella oxytoca	CC-T-AC-G-G-G-A-G-GC--A-GCA-G-T-G-G-G-G-A-A--TA-TT--GC-A-C---AA-T-G-G--GC--GC-A-A--G-C--C-T-GA-T-G-C-A--GC-C--------A--T-GCC-G-C-G-T---------G-T-A--T--GA-A-G--A-A-G-G-CC----TT-CG-----------G-G-T--------T-G-T--A---AA-G-T-AC------------------------------TT-TC-A-G--C-GGG----G--A-G--G---AA--GGC-G---A-T-A--A-G--G----------T--T---------------------AA---------------------------------T---A----A-------CC-…	KleOx242	KleOx241	Klebsiella oxytoca
>000014869|size:10453	0.228906	96.7%:StaAu564;96.7%:EntFa534	Enterococcus faecalis	CC-T-AC-G-G-G-A-G-GC--A-GCA-G-T-A-G-G-G-A-A--TC-TT--CG-G-C---AA-T-G-G--AC--GA-A-A--G-T--C-T-GA-C-C-G-A--GC-A--------A--C-GCC-G-C-G-T---------G-A-G--T--GA-A-G--A-A-G-G-TT----TT-CG-----------G-A-T--------C-G-T--A---AA-A-C-TC------------------------------TG-TT-G-T--T-AGA----G--A-A--G---AA-CAAG-G---A-C-G--T-T--A----------G--T---------------------AA---------------------------------C--------T-------GA-…	StaAu564	EntFa534	Enterococcus faecalis
>000005677|size:14628	0.228025	97.1%:KleOx239;97.1%:KleOx235	Klebsiella oxytoca	CC-T-AC-G-G-G-A-G-GC--A-GCA-G-T-G-G-G-G-A-A--TA-TT--GC-A-C---AA-T-G-G--GC--GC-A-A--G-C--C-T-GA-T-G-C-A--GC-C--------A--T-GCC-G-C-G-T---------G-T-A--T--GA-A-G--A-A-G-G-CC----TT-CG-----------G-G-T--------T-G-T--A---AA-G-T-AC------------------------------TT-TC-A-G--C-GGG----G--A-G--G---AA--GGG-A---G-T-G--A-G--G----------T--T---------------------AA---------------------------------T---A----A-------CC-…	KleOx239	KleOx235	Klebsiella oxytoca
>000015604|size:11823	0.222882	96.7%:StaEp124;96.7%:StaEp123	Staphylococcus epidermidis	CC-T-AC-G-G-G-A-G-GC--A-GCA-G-T-A-G-G-G-A-A--TC-TT--CC-G-C---AA-T-G-G--GC--GA-A-A--G-C--C-T-GA-C-G-G-A--GC-A--------A--C-GCC-G-C-G-T---------G-A-G--T--GA-T-G--A-A-G-G-TC----TT-CG-----------G-A-T--------C-G-T--A---AA-A-C-TC------------------------------TG-TT-A-T--T-AGG----G--A-A--G---AA-CAAA-T---G-T-G--T-A--A----------G--T---------------------AA---------------------------------C--------T-------AT-…	StaEp124	StaEp123	Staphylococcus epidermidis
>000001536|size:10167	0.219158	96.6%:CorPse92;96.6%:CorPse91	Corynebacterium tuberculostearicum	CC-T-AC-G-G-G-A-G-GC--A-GCA-G-T-G-G-G-G-A-A--TA-TT--GC-A-C---AA-T-G-G--GC--GC-A-A--G-C--C-T-GA-T-G-C-A--GC-G--------A--C-GCC-G-C-G-T---------G-G-G--G--GA-T-G--A-C-G-G-CC----TT-CG-----------G-G-T--------T-G-T--A---AA-C-T-CC------------------------------TT-TC-G-C--T-AGG----G--A-C--G---AA--G-C-T-----------------------------T---------------------TT-----------------------------------------------------…	CorPse92	CorPse91	Corynebacterium tuberculostearicum
>000003013|size:10229	0.214033	96.7%:StaWar47;96.7%:AciBa511	Staphylococcus warneri	CC-T-AC-G-G-G-A-G-GC--A-GCA-G-T-A-G-G-G-A-A--TC-TT--CC-G-C---AA-T-G-G--GC--GA-A-A--G-C--C-T-GA-C-G-G-A--GC-A--------A--C-GCC-G-C-G-T---------G-A-G--T--GA-T-G--A-A-G-G-TC----TT-CG-----------G-A-T--------C-G-T--A---AA-A-C-TC------------------------------TG-TT-A-T--C-AGG----G--A-A--G---AA-CAAA-T---G-T-G--T-A--A----------G--T---------------------AA---------------------------------C--------T-------GT-…	StaWar47	AciBa511	Staphylococcus warneri
>000001946|size:11675	0.209423	96.7%:AciGui12;96.7%:AciGui11	Acinetobacter guillouiae/iwoffii	CC-T-AC-G-G-G-A-G-GC--A-GCA-G-T-G-G-G-G-A-A--TA-TT--GG-A-C---AA-T-G-G--GG--GG-A-A--C-C--C-T-GA-T-C-C-A--GC-C--------A--T-GCC-G-C-G-T---------G-T-G--T--GA-A-G--A-A-G-G-CC----TT-AT-----------G-G-T--------T-G-T--A---AA-G-C-AC------------------------------TT-TA-A-G--C-GAG----G--A-G--G---AG--GCT-C---T-C-T--T-G--G----------T--T---------------------AA---------------------------------T---A----C-------CC-…	AciGui12	AciGui11	Acinetobacter guillouiae/iwoffii
>000005676|size:9233	0.207384	97.1%:KleOx208;97.1%:KleOx207	Klebsiella oxytoca	CC-T-AC-G-G-G-A-G-GC--A-GCA-G-T-G-G-G-G-A-A--TA-TT--GC-A-C---AA-T-G-G--GC--GC-A-A--G-C--C-T-GA-T-G-C-A--GC-C--------A--T-GCC-G-C-G-T---------G-T-A--T--GA-A-G--A-A-G-G-CC----TT-CG-----------G-G-T--------T-G-T--A---AA-G-T-AC------------------------------TT-TC-A-G--C-GGG----G--A-G--G---AA--GGG-A---G-T-G--A-G--G----------T--T---------------------AA---------------------------------T---A----A-------CC-…	KleOx208	KleOx207	Klebsiella oxytoca
>000013382|size:15056	0.207139	96.7%:KleP1010;96.7%:KleVar41	Klebsiella pneumoniae	CC-T-AC-G-G-G-A-G-GC--A-GCA-G-T-G-G-G-G-A-A--TA-TT--GC-A-C---AA-T-G-G--GC--GC-A-A--G-C--C-T-GA-T-G-C-A--GC-C--------A--T-GCC-G-C-G-T---------G-T-G--T--GA-A-G--A-A-G-G-CC----TT-CG-----------G-G-T--------T-G-T--A---AA-G-C-AC------------------------------TT-TC-A-G--C-GGG----G--A-G--G---AA--GGC-G---A-T-A--A-G--G----------T--T---------------------AA---------------------------------T---A----A-------CC-…	KleP1010	KleVar41	Klebsiella pneumoniae
>000001158|size:18358	0.202441	96.7%:KleP1015;96.7%:KleP1009	Klebsiella pneumoniae	CC-T-AC-G-G-G-A-G-GC--A-GCA-G-T-G-G-G-G-A-A--TA-TT--GC-A-C---AA-T-G-G--GC--GC-A-A--G-C--C-T-GA-T-G-C-A--GC-C--------A--T-GCC-G-C-G-T---------G-T-G--T--GA-A-G--A-A-G-G-CC----TT-CG-----------G-G-T--------T-G-T--A---AA-G-C-AC------------------------------TT-TC-A-G--C-GGG----G--A-G--G---AA--GGC-G---G-T-G--A-G--G----------T--T---------------------AA---------------------------------T---A----A-------CC-…	KleP1015	KleP1009	Klebsiella pneumoniae
>000014051|size:14500	0.195014	96.7%:StaAu564;96.7%:EntFa534	Enterococcus faecalis	CC-T-AC-G-G-G-A-G-GC--A-GCA-G-T-A-G-G-G-A-A--TC-TT--CG-G-C---AA-T-G-G--AC--GA-A-A--G-T--C-T-GA-C-C-G-A--GC-A--------A--C-GCC-G-C-G-T---------G-A-G--T--GA-A-G--A-A-G-G-TT----TT-CG-----------G-A-T--------C-G-T--A---AA-A-C-TC------------------------------TG-TT-G-T--T-AGA----G--A-A--G---AA-CAAG-G---A-C-G--T-T--A----------G--T---------------------AA---------------------------------C--------T-------GA-…	StaAu564	EntFa534	Enterococcus faecalis
>000012914|size:5206	0.192625	96.9%:KleOxy31;96.7%:KleOx242		CC-T-AC-G-G-G-A-G-GC--A-GCA-G-T-G-G-G-G-A-A--TA-TT--GC-A-C---AA-T-G-G--GC--GC-A-A--G-C--C-T-GA-T-G-C-A--GC-C--------A--T-GCC-G-C-G-T---------G-T-A--T--GA-A-G--A-A-G-G-CC----TT-CG-----------G-G-T--------T-G-T--A---AA-G-T-AC------------------------------TT-TC-A-G--C-GGG----G--A-G--G---AA--GGC-G---A-T-A--A-G--G----------T--T---------------------AA---------------------------------T---A----A-------CC-…	KleOxy31	KleOx242	Klebsiella oxytoca
>000001146|size:17448	0.189428	94.5%:KlePn578;94.5%:KlePn568	Klebsiella pneumoniae	CC-T-AC-G-G-G-A-G-GC--A-GCA-G-T-G-G-G-G-A-A--TA-TT--GC-A-C---AA-T-G-G--GC--GC-A-A--G-C--C-T-GA-T-G-C-A--GC-C--------A--T-GCC-G-C-G-T---------G-T-G--T--GA-A-G--A-A-G-G-CC----TT-CG-----------G-G-T--------T-G-T--A---AA-G-C-AC------------------------------TT-TC-A-G--C-GGG----G--A-G--G---AA--GGC-G---C-T-A--A-G--G----------T--T---------------------AA---------------------------------T---A----A-------CC-…	KlePn578	KlePn568	Klebsiella pneumoniae
>000015883|size:3909	0.186368	96.7%:StaEp124;96.7%:StaEp123		CC-T-AC-G-G-G-A-G-GC--A-GCA-G-T-A-G-G-G-A-A--TC-TT--CC-G-C---AA-T-G-G--GC--GA-A-A--G-C--C-T-GA-C-G-G-A--GC-A--------A--C-GCC-G-C-G-T---------G-A-G--T--GA-T-G--A-A-G-G-TC----TT-CG-----------G-A-T--------C-G-T--A---AA-A-C-TC------------------------------TG-TT-A-T--T-AGG----G--A-A--G---AA-CAAA-T---G-T-G--T-A--A----------G--T---------------------AA---------------------------------C--------T-------AT-…	StaEp124	StaEp123	Staphylococcus epidermidis
>000001152|size:13335	0.182005	94.1%:KlePn578;94.1%:KlePn568	Klebsiella pneumoniae	CC-T-AC-G-G-G-A-G-GC--A-GCA-G-T-G-G-G-G-A-A--TA-TT--GC-A-C---AA-T-G-G--GC--GC-A-A--G-C--C-T-GA-T-G-C-A--GC-C--------A--T-GCC-G-C-G-T---------G-T-G--T--GA-A-G--A-A-G-G-CC----TT-CG-----------G-G-T--------T-G-T--A---AA-G-C-AC------------------------------TT-TC-A-G--C-GGG----G--A-G--G---AA--GGC-G---C-T-A--A-G--G----------T--T---------------------AA---------------------------------T---A----A-------CC-…	KlePn578	KlePn568	Klebsiella pneumoniae
>000006136|size:11819	0.181092	98.0%:KleOx239;98.0%:KleOx235	Klebsiella oxytoca	CC-T-AC-G-G-G-A-G-GC--A-GCA-G-T-G-G-G-G-A-A--TA-TT--GC-A-C---AA-T-G-G--GC--GC-A-A--G-C--C-T-GA-T-G-C-A--GC-C--------A--T-GCC-G-C-G-T---------G-T-A--T--GA-A-G--A-A-G-G-CC----TT-CG-----------G-G-T--------T-G-T--A---AA-G-T-AC------------------------------TT-TC-A-G--C-GGG----G--A-G--G---AA--GGG-A---G-T-G--A-G--G----------T--T---------------------AA---------------------------------T---A----A-------CC-…	KleOx239	KleOx235	Klebsiella oxytoca
>000008527|size:6925	0.179566	96.5%:SpnEchi8;96.5%:SpnAlpin	Sphingomonas echinoides	CC-T-AC-G-G-G-A-G-GC--A-GCA-G-T-G-G-G-G-A-A--TA-TT--GG-A-C---AA-T-G-G--GC--GA-A-A--G-C--C-T-GA-T-C-C-A--GC-A--------A--T-GCC-G-C-G-T---------G-A-G--T--GA-T-G--A-A-G-G-CC----TT-AG-----------G-G-T--------T-G-T--A---AA-G-C-TC------------------------------TT-TT-A-C--C-CGG----G--A-T--G---A-------------------------------------T---------------------AA-----------------------------------------------------…	SpnEchi8	SpnAlpin	Sphingomonas echinoides
>000000720|size:13384	0.177717	96.7%:PntCali2;96.7%:PntCalid	Pantoea calida	CC-T-AC-G-G-G-A-G-GC--A-GCA-G-T-G-G-G-G-A-A--TA-TT--GC-A-C---AA-T-G-G--GC--GC-A-A--G-C--C-T-GA-T-G-C-A--GC-C--------A--T-GCC-G-C-G-T---------G-T-A--T--GA-A-G--A-A-G-G-CC----TT-CG-----------G-G-T--------T-G-T--A---AA-G-T-AC------------------------------TT-TC-A-G--C-GGG----G--A-G--G---AA--GGG-A---T-G-G--T-G--C----------T--T---------------------AA---------------------------------T---A----C-------GC-…	PntCali2	PntCalid	Pantoea calida
>000001629|size:13456	0.176354	96.7%:KlePn604;96.7%:StaLug16	Staphylococcus lugdunensis	CC-T-AC-G-G-G-A-G-GC--A-GCA-G-T-A-G-G-G-A-A--TC-TT--CC-G-C---AA-T-G-G--GC--GA-A-A--G-C--C-T-GA-C-G-G-A--GC-A--------A--C-GCC-G-C-G-T---------G-A-G--T--GA-T-G--A-A-G-G-TC----TT-AG-----------G-A-T--------C-G-T--A---AA-A-C-TC------------------------------TG-TT-A-T--T-AGG----G--A-A--G---AA-CAAA-C---G-T-G--T-A--A----------G--T---------------------AA---------------------------------C--------T-------GT-…	KlePn604	StaLug16	Staphylococcus lugdunensis
>000014516|size:2552	0.175952	96.7%:ShiSon39;96.7%:Esch1638		CC-T-AC-G-G-G-A-G-GC--A-GCA-G-T-G-G-G-G-A-A--TA-TT--GC-A-C---AA-T-G-G--GC--GC-A-A--G-C--C-T-GA-T-G-C-A--GC-C--------A--T-GCC-G-C-G-T---------G-T-A--T--GA-A-G--A-A-G-G-CC----TT-CG-----------G-G-T--------T-G-T--A---AA-G-T-AC------------------------------TT-TC-A-G--C-GGG----G--A-G--G---AA--GGG-A---G-T-A--A-A--G----------T--T---------------------AA---------------------------------T---A----C-------CT-…	ShiSon39	Esch1638	Escherichia/Shigella
>000001555|size:7820	0.17038	96.6%:CorPse92;96.6%:CorPse91		CC-T-AC-G-G-G-A-G-GC--A-GCA-G-T-G-G-G-G-A-A--TA-TT--GC-A-C---AA-T-G-G--GC--GC-A-A--G-C--C-T-GA-T-G-C-A--GC-G--------A--C-GCC-G-C-G-T---------G-G-G--G--GA-T-G--A-C-G-G-CC----TT-CG-----------G-G-T--------T-G-T--A---AA-C-T-CC------------------------------TT-TC-G-C--T-AGG----G--A-C--G---AA--G-C-T-----------------------------T---------------------TT-----------------------------------------------------…	CorPse92	CorPse91	Corynebacterium tuberculostearicum
>000007020|size:10797	0.16997	96.7%:PntSte20;94.1%:PntSep13	Pantoea septica	CC-T-AC-G-G-G-A-G-GC--A-GCA-G-T-G-G-G-G-A-A--TA-TT--GC-A-C---AA-T-G-G--GC--GC-A-A--G-C--C-T-GA-T-G-C-A--GC-C--------A--T-GCC-G-C-G-T---------G-T-A--T--GA-A-G--A-A-G-G-CC----TT-CG-----------G-G-T--------T-G-T--A---AA-G-T-AC------------------------------TT-TC-A-G--C-GGG----G--A-G--G---AA--GGC-G---A-T-G--C-G--G----------T--T---------------------AA---------------------------------T---A----A-------CC-…	PntSte20	PntSep13	Pantoea septica
>000008379|size:11758	0.166879	97.7%:PpcDi105;97.7%:PpcDi102	Clostridioides difficile	CC-T-AC-G-G-G-A-G-GC--A-GCA-G-T-G-G-G-G-A-A--TA-TT--GC-A-C---AA-T-G-G--GC--GA-A-A--G-C--C-T-GA-T-G-C-A--GC-A--------A--C-GCC-G-C-G-T---------G-A-G--T--GA-T-G--A-A-G-G-CC----TT-CG-----------G-G-T--------C-G-T--A---AA-A-C-TC------------------------------TG-TC-C-T--C-AAG----G--A-A--G---A-------------------------------------T---------------------AA-----------------------------------------------------…	PpcDi105	PpcDi102	Clostridioides difficile
>000005678|size:8669	0.165189	99.8%:KleOx239;99.8%:KleOx235		CC-T-AC-G-G-G-A-G-GC--A-GCA-G-T-G-G-G-G-A-A--TA-TT--GC-A-C---AA-T-G-G--GC--GC-A-A--G-C--C-T-GA-T-G-C-A--GC-C--------A--T-GCC-G-C-G-T---------G-T-A--T--GA-A-G--A-A-G-G-CC----TT-CG-----------G-G-T--------T-G-T--A---AA-G-T-AC------------------------------TT-TC-A-G--C-GGG----G--A-G--G---AA--GGG-A---G-T-G--A-G--G----------T--T---------------------AA---------------------------------T---A----A-------CC-…	KleOx239	KleOx235	Klebsiella oxytoca
>000011120|size:7876	0.164684	96.7%:StaAu565;96.7%:StaAu563		CC-T-AC-G-G-G-A-G-GC--A-GCA-G-T-A-G-G-G-A-A--TC-TT--CC-G-C---AA-T-G-G--GC--GA-A-A--G-C--C-T-GA-C-G-G-A--GC-A--------A--C-GCC-G-C-G-T---------G-A-G--T--GA-T-G--A-A-G-G-TC----TT-CG-----------G-A-T--------C-G-T--A---AA-A-C-TC------------------------------TG-TT-A-T--T-AGG----G--A-A--G---AA-CATA-T---G-T-G--T-A--A----------G--T---------------------AA---------------------------------C--------T-------GT-…	StaAu565	StaAu563	Staphylococcus aureus
>000004802|size:12097	0.163787	96.7%:StaEpi99;96.7%:StaEpi80	Staphylococcus epidermidis	CC-T-AC-G-G-G-A-G-GC--A-GCA-G-T-A-G-G-G-A-A--TC-TT--CC-G-C---AA-T-G-G--GC--GA-A-A--G-C--T-T-GA-C-G-G-A--GC-A--------A--C-GCC-G-C-G-T---------G-A-G--T--GA-T-G--A-A-G-G-TC----TT-CG-----------G-A-T--------C-G-T--A---AA-A-C-TC------------------------------TG-TT-A-T--T-AGG----G--A-A--G---AA-CAAA-T---G-T-G--T-A--A----------G--T---------------------AA---------------------------------C--------T-------AT-…	StaEpi99	StaEpi80	Staphylococcus epidermidis
>000002824|size:11603	0.162575	96.6%:AcyNeui6;94.6%:AcyNeui4	Actinomyces neuii	CC-T-AC-G-G-G-A-G-GC--A-GCA-G-T-G-G-G-G-G-A--TA-TT--GC-A-C---AA-T-G-G--AC--GA-A-A--G-T--C-T-GA-T-G-C-A--GC-G--------A--C-GTC-G-T-G-T---------G-G-G--G--GA-T-G--A-A-G-G-CC----TT-CG-----------G-G-T--------T-G-T--A---AA-C-T-CC------------------------------TT-TC-G-C--C-CGC----G--G-A--A---AA-GGCA-G---G-G-T---------------------T---------------------TT---------------------------------G-------------------…	AcyNeui6	AcyNeui4	Actinomyces neuii
>000009667|size:15999	0.15926	96.7%:BcsDor15;96.7%:BcsFra27	Bacteroides fragilis	CC-T-AC-G-G-G-A-G-GC--A-GCA-G-T-G-A-G-G-A-A--TA-TT--GG-T-C---AA-T-G-G--GC--GT-T-A--G-C--C-T-GA-A-C-C-A--GC-C--------A--A-GTA-G-C-G-T---------G-A-A--G--GA-T-G--A-A-G-G-CT-C--TA-TG-----------G-G-T--------C-G-T--A---AA-C-T-TC------------------------------TT-TT-A-T--A-TAA----G--A-A--T---AA-AGTG-C---A-G-T--A------------------T---------------------GT---------------------------------A-------------------…	BcsDor15	BcsFra27	Bacteroides fragilis
>000005004|size:6395	0.157908	97.8%:StaEpi99;97.8%:StaEpi80		CC-T-AC-G-G-G-A-G-GC--A-GCA-G-T-A-G-G-G-A-A--TC-TT--CC-G-C---AA-T-G-G--GC--GA-A-A--G-C--T-T-GA-C-G-G-A--GC-A--------A--C-GCC-G-C-G-T---------G-A-G--T--GA-T-G--A-A-G-G-TC----TT-CG-----------G-A-T--------C-G-T--A---AA-A-C-TC------------------------------TG-TT-A-T--T-AGG----G--A-A--G---AA-CAAA-T---G-T-G--T-A--A----------G--T---------------------AA---------------------------------C--------T-------AT-…	StaEpi99	StaEpi80	Staphylococcus epidermidis
>000001952|size:9357	0.157285	99.8%:AciGui12;99.8%:AciGui11	Acinetobacter guillouiae/iwoffii	CC-T-AC-G-G-G-A-G-GC--A-GCA-G-T-G-G-G-G-A-A--TA-TT--GG-A-C---AA-T-G-G--GG--GG-A-A--C-C--C-T-GA-T-C-C-A--GC-C--------A--T-GCC-G-C-G-T---------G-T-G--T--GA-A-G--A-A-G-G-CC----TT-AT-----------G-G-T--------T-G-T--A---AA-G-C-AC------------------------------TT-TA-A-G--C-GAG----G--A-G--G---AG--GCT-C---T-C-T--T-G--G----------T--T---------------------AA---------------------------------T---A----C-------CC-…	AciGui12	AciGui11	Acinetobacter guillouiae/iwoffii
>000002351|size:11249	0.156678	97.1%:SttSa536;97.1%:SttSa535	Streptococcus salivarius	CC-T-AC-G-G-G-A-G-GC--A-GCA-G-T-A-G-G-G-A-A--TC-TT--CG-G-C---AA-T-G-G--GG--GC-A-A--C-C--C-T-GA-C-C-G-A--GC-A--------A--C-GCC-G-C-G-T---------G-A-G--T--GA-A-G--A-A-G-G-TT----TT-CG-----------G-A-T--------C-G-T--A---AA-G-C-TC------------------------------TG-TT-G-T--A-AGT----C--A-A--G---AA-CGAG-T---G-T-G--A-G--A----------G--T---------------------GG---------------------------------A---A----A-------GT-…	SttSa536	SttSa535	Streptococcus salivarius
>000012943|size:8609	0.155422	99.8%:KleOx242;99.8%:KleOx241		CC-T-AC-G-G-G-A-G-GC--A-GCA-G-T-G-G-G-G-A-A--TA-TT--GC-A-C---AA-T-G-G--GC--GC-A-A--G-C--C-T-GA-T-G-C-A--GC-C--------A--T-GCC-G-C-G-T---------G-T-A--T--GA-A-G--A-A-G-G-CC----TT-CG-----------G-G-T--------T-G-T--A---AA-G-T-AC------------------------------TT-TC-A-G--C-GGG----G--A-G--G---AA--GGC-G---A-T-A--A-G--G----------T--T---------------------AA---------------------------------T---A----A-------CC-…	KleOx242	KleOx241	Klebsiella oxytoca
>000005940|size:12071	0.155278	96.7%:KleOx239;96.7%:KleOx235	Klebsiella oxytoca	CC-T-AC-G-G-G-A-G-GC--A-GCA-G-T-G-G-G-G-A-A--TA-TT--GC-A-C---AA-T-G-G--GC--GC-A-A--G-C--C-T-GA-T-G-C-A--GC-C--------A--T-GCC-G-C-G-T---------G-T-A--T--GA-A-G--A-A-G-G-CC----TT-CG-----------G-G-T--------T-G-T--A---AA-G-T-AC------------------------------TT-TC-A-G--C-GGG----G--A-G--G---AA--GGG-A---G-T-G--A-G--G----------T--T---------------------AA---------------------------------T---A----A-------CC-…	KleOx239	KleOx235	Klebsiella oxytoca
>000010373|size:13520	0.154692	97.1%:EntFa540;97.1%:EntFa539	Enterococcus faecium	CC-T-AC-G-G-G-A-G-GC--A-GCA-G-T-A-G-G-G-A-A--TC-TT--CG-G-C---AA-T-G-G--AC--GA-A-A--G-T--C-T-GA-C-C-G-A--GC-A--------A--C-GCC-G-C-G-T---------G-A-G--T--GA-A-G--A-A-G-G-TT----TT-CG-----------G-A-T--------C-G-T--A---AA-A-C-TC------------------------------TG-TT-G-T--T-AGA----G--A-A--G---AA-CAAG-G---A-T-G--A-G--A----------G--T---------------------AA---------------------------------C--------T-------GT-…	EntFa540	EntFa539	Enterococcus faecium
>000013589|size:13583	0.154384	96.7%:BcsVul15;96.7%:BcsVul14	Bacteroides vulgatus	CC-T-AC-G-G-G-A-G-GC--A-GCA-G-T-G-A-G-G-A-A--TA-TT--GG-T-C---AA-T-G-G--GC--GA-G-A--G-C--C-T-GA-A-C-C-A--GC-C--------A--A-GTA-G-C-G-T---------G-A-A--G--GA-T-G--A-C-T-G-CC-C--TA-TG-----------G-G-T--------T-G-T--A---AA-C-T-TC------------------------------TT-TT-A-T--A-AAG----G--A-A--T---AA-AGTC-G---G-G-T--A------------------T---------------------GG---------------------------------A-------------------…	BcsVul15	BcsVul14	Bacteroides vulgatus
>000012882|size:4487	0.153134	96.7%:EnrCl498;96.7%:EnrCl489		CC-T-AC-G-G-G-A-G-GC--A-GCA-G-T-G-G-G-G-A-A--TA-TT--GC-A-C---AA-T-G-G--GC--GC-A-A--G-C--C-T-GA-T-G-C-A--GC-C--------A--T-GCC-G-C-G-T---------G-T-A--T--GA-A-G--A-A-G-G-CC----TT-CG-----------G-G-T--------T-G-T--A---AA-G-T-AC------------------------------TT-TC-A-G--C-GGG----G--A-G--G---AA--GGC-G---A-C-A--G-G--G----------T--T---------------------AA---------------------------------T---A----A-------CC-…	EnrCl498	EnrCl489	Enterobacter cloacae
>000002181|size:3766	0.150414	96.7%:UndOligo;90.1%:BacPH120		CC-T-AC-G-G-G-A-G-GC--A-GCA-G-T-G-G-G-G-A-A--TT-TT--GG-A-C---AA-T-G-G--GG--GC-A-A--C-C--C-T-GA-T-C-C-A--GC-A--------A--T-GCC-G-C-G-T---------G-A-G--T--GA-A-G--A-A-G-G-CC----CT-CG-----------G-G-T--------T-G-T--A---AA-G-C-TC------------------------------TT-TT-G-T--C-AGG----G--A-A--G---AA--ACG-G---A-G-T--T-C--T----------C--T---------------------AA---------------------------------T---A----T-------AG-…	UndOligo	BacPH120	Undibacterium oligocarboniphilum
>000013592|size:12168	0.148246	95.1%:BcsVul15;95.1%:BcsVul14	Bacteroides vulgatus	CC-T-AC-G-G-G-A-G-GC--A-GCA-G-T-G-A-G-G-A-A--TA-TT--GG-T-C---AA-T-G-G--GT--GA-G-A--G-C--C-T-GA-A-C-C-A--GC-C--------A--A-GTA-G-C-G-T---------G-A-A--G--GA-T-G--A-C-T-G-CC-C--TA-TG-----------G-G-T--------T-G-T--A---AA-C-T-TC------------------------------TT-TT-A-T--A-AAG----G--A-A--T---AA-AGTC-G---G-G-T--A------------------T---------------------GG---------------------------------A-------------------…	BcsVul15	BcsVul14	Bacteroides vulgatus
>000009925|size:6290	0.147317	97.8%:LacAnim8;97.8%:LacAnim6	Lactobacillus animalis	CC-T-AC-G-G-G-A-G-GC--A-GCA-G-T-A-G-G-G-A-A--TC-TT--CC-A-C---AA-T-G-G--GC--GA-A-A--G-C--C-T-GA-T-G-G-A--GC-A--------A--C-GCC-G-C-G-T---------G-G-G--T--GA-A-G--A-A-G-G-TC----TT-CG-----------G-A-T--------C-G-T--A---AA-A-C-CC------------------------------TG-TT-G-T--T-AGA----G--A-A--G---AA-AGTG-C---G-T-G--A-G--A----------G--T---------------------AA---------------------------------C--------T-------GT-…	LacAnim8	LacAnim6	Lactobacillus animalis
>000002357|size:3646	0.143197	96.7%:SttSa536;96.7%:SttSa535		CC-T-AC-G-G-G-A-G-GC--A-GCA-G-T-A-G-G-G-A-A--TC-TT--CG-G-C---AA-T-G-G--GG--GC-A-A--C-C--C-T-GA-C-C-G-A--GC-A--------A--C-GCC-G-C-G-T---------G-A-G--T--GA-A-G--A-A-G-G-TT----TT-CG-----------G-A-T--------C-G-T--A---AA-G-C-TC------------------------------TG-TT-G-T--A-AGT----C--A-A--G---AA-CGAG-T---G-T-G--A-G--A----------G--T---------------------GG---------------------------------A---A----A-------GT-…	SttSa536	SttSa535	Streptococcus salivarius
>000003366|size:9759	0.142025	96.6%:CorPyru4;96.6%:CorPyru3	Corynebacterium pyruviciproducens	CC-T-AC-G-G-G-A-G-GC--A-GCA-G-T-G-G-G-G-A-A--TT-TT--GC-A-C---AA-T-G-G--GC--GG-A-A--G-C--C-T-GA-T-G-C-A--GC-G--------A--C-GCC-G-T-G-T---------G-G-G--G--GA-T-G--A-A-G-G-CC----TT-CG-----------G-G-T--------T-G-T--A---AA-C-T-CC------------------------------TT-TC-G-T--C-AGG----G--A-C--G---AA--G-T-------------------------------T---------------------TG---------------------------------T-------------------…	CorPyru4	CorPyru3	Corynebacterium pyruviciproducens
>000008364|size:11105	0.139584	97.9%:PpcDi105;97.9%:PpcDi102	Clostridioides difficile	CC-T-AC-G-G-G-A-G-GC--A-GCA-G-T-G-G-G-G-A-A--TA-TT--GC-A-C---AA-T-G-G--GC--GA-A-A--G-C--C-T-GA-T-G-C-A--GC-A--------A--C-GCC-G-C-G-T---------G-A-G--T--GA-T-G--A-A-G-G-CC----TT-CG-----------G-G-T--------C-G-T--A---AA-A-C-TC------------------------------TG-TC-C-T--C-AAG----G--A-A--G---A-------------------------------------T---------------------AA-----------------------------------------------------…	PpcDi105	PpcDi102	Clostridioides difficile
>000015863|size:12127	0.136793	98.0%:StaEp124;98.0%:StaEp123	Staphylococcus epidermidis	CC-T-AC-G-G-G-A-G-GC--A-GCA-G-T-A-G-G-G-A-A--TC-TT--CC-G-C---AA-T-G-G--GC--GA-A-A--G-C--C-T-GA-C-G-G-A--GC-A--------A--C-GCC-G-C-G-T---------G-A-G--T--GA-T-G--A-A-G-G-TC----TT-CG-----------G-A-T--------C-G-T--A---AA-A-C-TC------------------------------TG-TT-A-T--T-AGG----G--A-A--G---AA-CAAA-T---G-T-G--T-A--A----------G--T---------------------AA---------------------------------C--------T-------AT-…	StaEp124	StaEp123	Staphylococcus epidermidis
>000011885|size:4836	0.136185	96.7%:VeiDisp6;96.7%:VeiDisp5	Veillonella dispar	CC-T-AC-G-G-G-A-G-GC--A-GCA-G-T-G-G-G-G-A-A--TC-TT--CC-G-C---AA-T-G-G--AC--GA-A-A--G-T--C-T-GA-C-G-G-A--GC-A--------A--C-GCC-G-C-G-T---------G-A-G--T--GA-T-G--A-C-G-G-CC----TT-CG-----------G-G-T--------T-G-T--A---AA-G-C-TC------------------------------TG-TT-A-A--T-CGG----G--A-C--G---AA-AGGC-C---T-T-C--T-T--G----------C--G---------------------AA---------------------------------T---A----G-------TT-…	VeiDisp6	VeiDisp5	Veillonella dispar
>000002334|size:11507	0.13509	96.7%:SttSa536;96.7%:SttSa535	Streptococcus salivarius	CC-T-AC-G-G-G-A-G-GC--A-GCA-G-T-A-G-G-G-A-A--TC-TT--CG-G-C---AA-T-G-G--GG--GC-A-A--C-C--C-T-GA-C-C-G-A--GC-A--------A--C-GCC-G-C-G-T---------G-A-G--T--GA-A-G--A-A-G-G-TT----TT-CG-----------G-A-T--------C-G-T--A---AA-G-C-TC------------------------------TG-TT-G-T--A-AGT----C--A-A--G---AA-CGAG-T---G-T-G--A-G--A----------G--T---------------------GG---------------------------------A---A----A-------GT-…	SttSa536	SttSa535	Streptococcus salivarius
>000002997|size:11426	0.134848	98.0%:StaAu565;98.0%:StaAu563	Staphylococcus aureus	CC-T-AC-G-G-G-A-G-GC--A-GCA-G-T-A-G-G-G-A-A--TC-TT--CC-G-C---AA-T-G-G--GC--GA-A-A--G-C--C-T-GA-C-G-G-A--GC-A--------A--C-GCC-G-C-G-T---------G-A-G--T--GA-T-G--A-A-G-G-TC----TT-CG-----------G-A-T--------C-G-T--A---AA-A-C-TC------------------------------TG-TT-A-T--T-AGG----G--A-A--G---AA-CATA-T---G-T-G--T-A--A----------G--T---------------------AA---------------------------------C--------T-------GT-…	StaAu565	StaAu563	Staphylococcus aureus
>000010653|size:5803	0.12894	95.2%:StaAu564;95.2%:EntFa534		CC-T-AC-G-G-G-A-G-GC--A-GCA-G-T-A-G-G-G-A-A--TC-TT--CG-G-C---AA-T-G-G--AC--GA-A-A--G-T--C-T-GA-C-C-G-A--GC-A--------A--C-GCC-G-C-G-T---------G-A-G--T--GA-A-G--A-A-G-G-TT----TT-CG-----------G-A-T--------C-G-T--A---AA-A-C-TC------------------------------TG-TT-G-T--T-AGA----G--A-A--G---AA-CAAG-G---A-C-G--T-T--A----------G--T---------------------AA---------------------------------C--------T-------GA-…	StaAu564	EntFa534	Enterococcus faecalis
>000005659|size:11460	0.126995	97.8%:KleOx239;97.8%:KleOx235	Klebsiella oxytoca	CC-T-AC-G-G-G-A-G-GC--A-GCA-G-T-G-G-G-G-A-A--TA-TT--GC-A-C---AA-T-G-G--GC--GC-A-A--G-C--C-T-GA-T-G-C-A--GC-C--------A--T-GCC-G-C-G-T---------G-T-A--T--GA-A-G--A-A-G-G-CC----TT-CG-----------G-G-T--------T-G-T--A---AA-G-T-AC------------------------------TT-TC-A-G--C-GGG----G--A-G--G---AA--GGG-A---G-T-G--A-G--G----------T--T---------------------AA---------------------------------T---A----A-------CC-…	KleOx239	KleOx235	Klebsiella oxytoca
>000009668|size:5492	0.126884	96.7%:PbdDist9;94.0%:PbdDis25		CC-T-AC-G-G-G-A-G-GC--A-GCA-G-T-G-A-G-G-A-A--TA-TT--GG-T-C---AA-T-G-G--GC--GT-A-A--G-C--C-T-GA-A-C-C-A--GC-C--------A--A-GTC-G-C-G-T---------G-A-G--G--GA-T-G--A-A-G-G-TT-C--TA-TG-----------G-A-T--------C-G-T--A---AA-C-C-TC------------------------------TT-TT-A-T--A-AGG----G--A-A--T---AA-AGTG-C---G-G-G--A------------------C---------------------GT---------------------------------G-------------------…	PbdDist9	PbdDis25	Parabacteroides distasonis
>000003368|size:6542	0.125777	96.6%:CorPyru4;96.6%:CorPyru3		CC-T-AC-G-G-G-A-G-GC--A-GCA-G-T-G-G-G-G-A-A--TT-TT--GC-A-C---AA-T-G-G--GC--GG-A-A--G-C--C-T-GA-T-G-C-A--GC-G--------A--C-GCC-G-T-G-T---------G-G-G--G--GA-T-G--A-A-G-G-CC----TT-CG-----------G-G-T--------T-G-T--A---AA-C-T-CC------------------------------TT-TC-G-T--C-AGG----G--A-C--G---AA--G-T-------------------------------T---------------------TG---------------------------------T-------------------…	CorPyru4	CorPyru3	Corynebacterium pyruviciproducens
>000007387|size:14000	0.125767	96.7%:EnrAsb91;96.7%:EnrCl188	Enterobacter cloacae	CC-T-AC-G-G-G-A-G-GC--A-GCA-G-T-G-G-G-G-A-A--TA-TT--GC-A-C---AA-T-G-G--GC--GC-A-A--G-C--C-T-GA-T-G-C-A--GC-C--------A--T-GCC-G-C-G-T---------G-T-A--T--GA-A-G--A-A-G-G-CC----TT-CG-----------G-G-T--------T-G-T--A---AA-G-T-AC------------------------------TT-TC-A-G--C-GGG----G--A-G--G---AA--GGC-G---G-T-G--A-G--G----------T--T---------------------AA---------------------------------T---A----A-------CC-…	EnrAsb91	EnrCl188	Enterobacter cloacae
>000002670|size:19114	0.120484	97.8%:EnrCl529;97.8%:EnrCl528	Enterobacter cloacae	CC-T-AC-G-G-G-A-G-GC--A-GCA-G-T-G-G-G-G-A-A--TA-TT--GC-A-C---AA-T-G-G--GC--GC-A-A--G-C--C-T-GA-T-G-C-A--GC-C--------A--T-GCC-G-C-G-T---------G-T-A--T--GA-A-G--A-A-G-G-CC----TT-CG-----------G-G-T--------T-G-T--A---AA-G-T-AC------------------------------TT-TC-A-G--C-GGG----G--A-G--G---AA--GGT-G---T-T-G--A-G--G----------T--T---------------------AA---------------------------------T---A----A-------CC-…	EnrCl529	EnrCl528	Enterobacter cloacae
>000001804|size:9601	0.120458	97.8%:BcsFra31;97.8%:BcsFra29	Bacteroides fragilis	CC-T-AC-G-G-G-A-G-GC--A-GCA-G-T-G-A-G-G-A-A--TA-TT--GG-T-C---AA-T-G-G--GC--GG-T-A--G-C--C-T-GA-A-C-C-A--GC-C--------A--A-GTA-G-C-G-T---------G-A-A--G--GA-T-G--A-A-G-G-CT-C--TA-TG-----------G-G-T--------C-G-T--A---AA-C-T-TC------------------------------TT-TT-A-T--A-TAA----G--A-A--T---AA-AGTG-C---A-G-T--A------------------T---------------------GT---------------------------------A-------------------…	BcsFra31	BcsFra29	Bacteroides fragilis
>000013463|size:14789	0.118139	97.8%:EnrCl527;97.8%:EnrCl526	Enterobacter cloacae	CC-T-AC-G-G-G-A-G-GC--A-GCA-G-T-G-G-G-G-A-A--TA-TT--GC-A-C---AA-T-G-G--GC--GC-A-A--G-C--C-T-GA-T-G-C-A--GC-C--------A--T-GCC-G-C-G-T---------G-T-A--T--GA-A-G--A-A-G-G-CC----TT-CG-----------G-G-T--------T-G-T--A---AA-G-T-AC------------------------------TT-TC-A-G--C-GGG----G--A-G--G---AA--GGC-G---A-T-A--A-G--G----------T--T---------------------AA---------------------------------T---A----A-------CC-…	EnrCl527	EnrCl526	Enterobacter cloacae
>000002679|size:10040	0.117627	97.8%:KleOx234;97.8%:KleOx231	Klebsiella oxytoca	CC-T-AC-G-G-G-A-G-GC--A-GCA-G-T-G-G-G-G-A-A--TA-TT--GC-A-C---AA-T-G-G--GC--GC-A-A--G-C--C-T-GA-T-G-C-A--GC-C--------A--T-GCC-G-C-G-T---------G-T-A--T--GA-A-G--A-A-G-G-CC----TT-CG-----------G-G-T--------T-G-T--A---AA-G-T-AC------------------------------TT-TC-A-G--C-GGG----G--A-G--G---AA--GGT-G---T-T-G--A-G--G----------T--T---------------------AA---------------------------------T---A----A-------CC-…	KleOx234	KleOx231	Klebsiella oxytoca
>000008472|size:6116	0.114719	96.5%:AauOctav;83.7%:AauSpec5	Anaerococcus octavius	CC-T-AC-G-G-G-A-G-GC--A-GCA-G-T-G-G-G-G-A-A--TT-TT--GC-A-C---AA-T-G-G--GG--GA-A-A--C-C--C-T-GA-T-G-C-A--GC-G--------A--C-GCC-G-C-G-T---------G-A-T--T--TA---G--A-A-G-G-CC----TT-CG-----------G-G-T--------T-G-T--A---AA-A-A-TC------------------------------TT-TT-G-T--A-TAG----G--A-A--G---A-------------------------------------A---------------------AA-----------------------------------------------------…	AauOctav	AauSpec5	Anaerococcus octavius
>000010918|size:8454	0.113702	96.7%:EnrCl529;96.7%:EnrCl528		CC-T-AC-G-G-G-A-G-GC--A-GCA-G-T-G-G-G-G-A-A--TA-TT--GC-A-C---AA-T-G-G--GC--GC-A-A--G-C--C-T-GA-T-G-C-A--GC-C--------A--T-GCC-G-C-G-T---------G-T-A--T--GA-A-G--A-A-G-G-CC----TT-CG-----------G-G-T--------T-G-T--A---AA-G-T-AC------------------------------TT-TC-A-G--C-GGG----G--A-G--G---AA--GGT-G---T-T-G--A-G--G----------T--T---------------------AA---------------------------------T---A----A-------CC-…	EnrCl529	EnrCl528	Enterobacter cloacae
>000006250|size:5795	0.113602	96.6%:BifLon65;96.6%:BifLon64		CC-T-AC-G-G-G-A-G-GC--A-GCA-G-T-G-G-G-G-A-A--TA-TT--GC-A-C---AA-T-G-G--GC--GC-A-A--G-C--C-T-GA-T-G-C-A--GC-G--------A--C-GCC-G-C-G-T---------G-A-G--G--GA-T-G--G-A-G-G-CC----TT-CG-----------G-G-T--------T-G-T--A---AA-C-C-TC------------------------------TT-TT-A-T--C-GGG----G--A-G--C---AA--G-C-------------------------------G---------------------TG---------------------------------A-------------------…	BifLon65	BifLon64	Bifidobacterium longum subsp. Infantis
>000008047|size:7453	0.112832	96.5%:ClsPer92;96.5%:ClsPer91		CC-T-AC-G-G-G-A-G-GC--A-GCA-G-T-G-G-G-G-A-A--TA-TT--GC-A-C---AA-T-G-G--GG--GA-A-A--C-C--C-T-GA-T-G-C-A--GC-A--------A--C-GCC-G-C-G-T---------G-A-G--T--GA-T-G--A-A-G-G-TT----TT-CG-----------G-A-T--------C-G-T--A---AA-G-C-TC------------------------------TG-TC-T-T--T-GGG----G--A-A--G---A-------------------------------------T---------------------AA-----------------------------------------------------…	ClsPer92	ClsPer91	Clostridium perfringens
>000013511|size:1448	0.111615	97.8%:EnrCl498;97.8%:EnrCl489		CC-T-AC-G-G-G-A-G-GC--A-GCA-G-T-G-G-G-G-A-A--TA-TT--GC-A-C---AA-T-G-G--GC--GC-A-A--G-C--C-T-GA-T-G-C-A--GC-C--------A--T-GCC-G-C-G-T---------G-T-A--T--GA-A-G--A-A-G-G-CC----TT-CG-----------G-G-T--------T-G-T--A---AA-G-T-AC------------------------------TT-TC-A-G--C-GGG----G--A-G--G---AA--GGC-G---A-C-A--G-G--G----------T--T---------------------AA---------------------------------T---A----A-------CC-…	EnrCl498	EnrCl489	Enterobacter cloacae
>000007935|size:8787	0.110799	96.5%:FinMag11;96.5%:FinMag10	Finegoldia magna	CC-T-AC-G-G-G-A-G-GC--A-GCA-G-T-G-G-G-G-A-A--TA-TT--GC-A-C---AA-T-G-G--GG--GA-A-A--C-C--C-T-GA-T-G-C-A--GC-G--------A--C-GCC-G-C-G-T---------G-A-A--C--GA-A-G--A-A-G-G-TA----TT-CG-----------T-A-T--------C-G-T--A---AA-G-T-TC------------------------------TG-TC-C-T--A-TGG----G--A-A--G---A-------------------------------------T---------------------AA-----------------------------------------------------…	FinMag11	FinMag10	Finegoldia magna
>000007400|size:8280	0.109594	96.7%:KleP1015;96.7%:KleP1009		CC-T-AC-G-G-G-A-G-GC--A-GCA-G-T-G-G-G-G-A-A--TA-TT--GC-A-C---AA-T-G-G--GC--GC-A-A--G-C--C-T-GA-T-G-C-A--GC-C--------A--T-GCC-G-C-G-T---------G-T-G--T--GA-A-G--A-A-G-G-CC----TT-CG-----------G-G-T--------T-G-T--A---AA-G-C-AC------------------------------TT-TC-A-G--C-GGG----G--A-G--G---AA--GGC-G---G-T-G--A-G--G----------T--T---------------------AA---------------------------------T---A----A-------CC-…	KleP1015	KleP1009	Klebsiella pneumoniae
>000000514|size:198120	0.109559	94.1%:StaEp124;94.1%:StaEp123	Staphylococcus epidermidis	CC-T-AC-G-G-G-A-G-GC--A-GCA-G-T-A-G-G-G-A-A--TC-TT--CC-G-C---AA-T-G-G--GC--GA-A-A--G-C--C-T-GA-C-G-G-A--GC-A--------A--C-GCC-G-C-G-T---------G-A-G--T--GA-T-G--A-A-G-G-TC----TT-CG-----------G-A-T--------C-G-T--A---AA-A-C-TC------------------------------TG-TT-A-T--T-AGG----G--A-A--G---AA-TAAA-T---G-T-G--T-A--A----------G--T---------------------AA---------------------------------C--------T-------AT-…	StaEp124	StaEp123	Staphylococcus epidermidis
>000013046|size:8617	0.109361	96.7%:EnrCl527;96.7%:EnrCl526		CC-T-AC-G-G-G-A-G-GC--A-GCA-G-T-G-G-G-G-A-A--TA-TT--GC-A-C---AA-T-G-G--GC--GC-A-A--G-C--C-T-GA-T-G-C-A--GC-C--------A--T-GCC-G-C-G-T---------G-T-A--T--GA-A-G--A-A-G-G-CC----TT-CG-----------G-G-T--------T-G-T--A---AA-G-T-AC------------------------------TT-TC-A-G--C-GGG----G--A-G--G---AA--GGC-G---A-T-A--A-G--G----------T--T---------------------AA---------------------------------T---A----A-------CC-…	EnrCl527	EnrCl526	Enterobacter cloacae
>000014908|size:2640	0.108202	97.8%:StaAu564;97.8%:EntFa534		CC-T-AC-G-G-G-A-G-GC--A-GCA-G-T-A-G-G-G-A-A--TC-TT--CG-G-C---AA-T-G-G--AC--GA-A-A--G-T--C-T-GA-C-C-G-A--GC-A--------A--C-GCC-G-C-G-T---------G-A-G--T--GA-A-G--A-A-G-G-TT----TT-CG-----------G-A-T--------C-G-T--A---AA-A-C-TC------------------------------TG-TT-G-T--T-AGA----G--A-A--G---AA-CAAG-G---A-C-G--T-T--A----------G--T---------------------AA---------------------------------C--------T-------GA-…	StaAu564	EntFa534	Enterococcus faecalis
>000008375|size:4682	0.108152	96.5%:PpcDi105;96.5%:PpcDi102		CC-T-AC-G-G-G-A-G-GC--A-GCA-G-T-G-G-G-G-A-A--TA-TT--GC-A-C---AA-T-G-G--GC--GA-A-A--G-C--C-T-GA-T-G-C-A--GC-A--------A--C-GCC-G-C-G-T---------G-A-G--T--GA-T-G--A-A-G-G-CC----TT-CG-----------G-G-T--------C-G-T--A---AA-A-C-TC------------------------------TG-TC-C-T--C-AAG----G--A-A--G---A-------------------------------------T---------------------AA-----------------------------------------------------…	PpcDi105	PpcDi102	Clostridioides difficile
>000003691|size:7875	0.107801	96.6%:CorSimu5;96.6%:CorSimu4	Corynebacterium simulans	CC-T-AC-G-G-G-A-G-GC--A-GCA-G-T-G-G-G-G-A-A--TA-TT--GC-A-C---AA-T-G-G--GC--GG-A-A--G-C--C-T-GA-T-G-C-A--GC-G--------A--C-GCC-G-C-G-T---------G-G-G--G--GA-T-G--A-A-G-G-CC----TT-CG-----------G-G-T--------T-G-T--A---AA-C-T-CC------------------------------TT-TC-G-A--C-AGG----G--A-C--G---AA--G-C-------------------------------T---------------------TT-----------------------------------------------------…	CorSimu5	CorSimu4	Corynebacterium simulans
>000005197|size:6454	0.10594	95.4%:StaEp124;95.4%:StaEp123		CC-T-AC-G-G-G-A-G-GC--A-GCA-G-T-A-G-G-G-A-A--TC-TT--CC-G-C---AA-T-G-G--GC--GA-A-A--G-C--C-T-GA-C-G-G-A--GC-A--------A--C-GCC-G-C-G-T---------G-A-G--T--GA-T-G--A-A-G-G-TC----TT-CG-----------G-A-T--------C-G-T--A---AA-A-C-TC------------------------------TG-TT-A-T--T-AGG----G--A-A--G---AA-TAAA-T---G-T-G--T-A--A----------G--T---------------------AA---------------------------------C--------T-------AT-…	StaEp124	StaEp123	Staphylococcus epidermidis
>000011632|size:7603	0.105425	96.7%:CtbFr154;96.7%:CtbFr149	Citrobacter freundii	CC-T-AC-G-G-G-A-G-GC--A-GCA-G-T-G-G-G-G-A-A--TA-TT--GC-A-C---AA-T-G-G--GC--GC-A-A--G-C--C-T-GA-T-G-C-A--GC-C--------A--T-GCC-G-C-G-T---------G-T-A--T--GA-A-G--A-A-G-G-CC----TT-CG-----------G-G-T--------T-G-T--A---AA-G-T-AC------------------------------TT-TC-A-G--C-GAG----G--A-G--G---AA--GGC-A---T-T-A--A-G--G----------T--T---------------------AA---------------------------------T---A----A-------CC-…	CtbFr154	CtbFr149	Citrobacter freundii
>000005661|size:7837	0.104935	96.7%:KleOx209;96.7%:KleOx142		CC-T-AC-G-G-G-A-G-GC--A-GCA-G-T-G-G-G-G-A-A--TA-TT--GC-A-C---AA-T-G-G--GC--GC-A-A--G-C--C-T-GA-T-G-C-A--GC-C--------A--T-GCC-G-C-G-T---------G-T-A--T--GA-A-G--A-A-G-G-CC----TT-CG-----------G-G-T--------T-G-T--A---AA-G-T-AC------------------------------TT-TC-A-G--C-GGG----G--A-G--G---AA--GGG-A---G-T-A--A-G--G----------T--T---------------------AA---------------------------------T---A----A-------CC-…	KleOx209	KleOx142	Klebsiella oxytoca
>000012156|size:6243	0.104051	97.8%:StaEp124;97.8%:StaEp123		CC-T-AC-G-G-G-A-G-GC--A-GCA-G-T-A-G-G-G-A-A--TC-TT--CC-G-C---AA-T-G-G--GC--GA-A-A--G-C--C-T-GA-C-G-G-A--GC-A--------A--C-GCC-G-C-G-T---------G-A-G--T--GA-T-G--A-A-G-G-TC----TT-CG-----------G-A-T--------C-G-T--A---AA-A-C-TC------------------------------TG-TT-A-T--T-AGG----G--A-A--G---AA-CAAA-T---G-T-G--T-A--A----------G--T---------------------AA---------------------------------C--------T-------AT-…	StaEp124	StaEp123	Staphylococcus epidermidis
>000013581|size:10378	0.103934	96.7%:KleP1002;96.7%:KlePn925	Klebsiella pneumoniae	CC-T-AC-G-G-G-A-G-GC--A-GCA-G-T-G-G-G-G-A-A--TA-TT--GC-A-C---AA-T-G-G--GC--GC-A-A--G-C--C-T-GA-T-G-C-A--GC-C--------A--T-GCC-G-C-G-T---------G-T-G--T--GA-A-G--A-A-G-G-CC----TT-CG-----------G-G-T--------T-G-T--A---AA-G-C-AC------------------------------TT-TC-A-G--C-GGG----G--A-G--G---AA--GGC-G---A-T-A--A-G--G----------T--T---------------------AA---------------------------------T---A----A-------CC-…	KleP1002	KlePn925	Klebsiella pneumoniae
>000009942|size:4453	0.103924	96.7%:AciGui12;96.7%:AciGui11		CC-T-AC-G-G-G-A-G-GC--A-GCA-G-T-G-G-G-G-A-A--TA-TT--GG-A-C---AA-T-G-G--GG--GG-A-A--C-C--C-T-GA-T-C-C-A--GC-C--------A--T-GCC-G-C-G-T---------G-T-G--T--GA-A-G--A-A-G-G-CC----TT-AT-----------G-G-T--------T-G-T--A---AA-G-C-AC------------------------------TT-TA-A-G--C-GAG----G--A-G--G---AG--GCT-C---T-C-T--T-G--G----------T--T---------------------AA---------------------------------T---A----C-------CC-…	AciGui12	AciGui11	Acinetobacter guillouiae/iwoffii
>000004058|size:4423	0.102686	96.7%:LacGas25;96.7%:LacGas24	Lactobacillus gasseri	CC-T-AC-G-G-G-A-G-GC--A-GCA-G-T-A-G-G-G-A-A--TC-TT--CC-A-C---AA-T-G-G--AC--GC-A-A--G-T--C-T-GA-T-G-G-A--GC-A--------A--C-GCC-G-C-G-T---------G-A-G--T--GA-A-G--A-A-G-G-GT----TT-CG-----------G-C-T--------C-G-T--A---AA-G-C-TC------------------------------TG-TT-G-G--T-AGT----G--A-A--G---AA-AGAT-A---G-A-G--G-T--A----------G--T---------------------AA---------------------------------C--------T-------GG-…	LacGas25	LacGas24	Lactobacillus gasseri
>000009206|size:7880	0.10126	96.7%:StaHae44;96.7%:StaHaem6	Staphylococcus haemolyticus	CC-T-AC-G-G-G-A-G-GC--A-GCA-G-T-A-G-G-G-A-A--TC-TT--CC-G-C---AA-T-G-G--GC--GA-A-A--G-C--C-T-GA-C-G-G-A--GC-A--------A--C-GCC-G-C-G-T---------G-A-G--T--GA-T-G--A-A-G-G-TC----TT-CG-----------G-A-T--------C-G-T--A---AA-A-C-TC------------------------------TG-TT-A-T--T-AGG----G--A-A--G---AA-CATA-C---G-T-G--T-A--A----------G--T---------------------AA---------------------------------C--------T-------AT-…	StaHae44	StaHaem6	Staphylococcus haemolyticus
>000008545|size:4395	0.0979164	96.5%:SpnEchi8;96.5%:SpnAlpin		CC-T-AC-G-G-G-A-G-GC--A-GCA-G-T-G-G-G-G-A-A--TA-TT--GG-A-C---AA-T-G-G--GC--GA-A-A--G-C--C-T-GA-T-C-C-A--GC-A--------A--T-GCC-G-C-G-T---------G-A-G--T--GA-T-G--A-A-G-G-CC----TT-AG-----------G-G-T--------T-G-T--A---AA-G-C-TC------------------------------TT-TT-A-C--C-CGG----G--A-T--G---A-------------------------------------T---------------------AA-----------------------------------------------------…	SpnEchi8	SpnAlpin	Sphingomonas echinoides
>000001843|size:7650	0.0975294	96.7%:BcsFra31;96.7%:BcsFra29		CC-T-AC-G-G-G-A-G-GC--A-GCA-G-T-G-A-G-G-A-A--TA-TT--GG-T-C---AA-T-G-G--GC--GG-T-A--G-C--C-T-GA-A-C-C-A--GC-C--------A--A-GTA-G-C-G-T---------G-A-A--G--GA-T-G--A-A-G-G-CT-C--TA-TG-----------G-G-T--------C-G-T--A---AA-C-T-TC------------------------------TT-TT-A-T--A-TAA----G--A-A--T---AA-AGTG-C---A-G-T--A------------------T---------------------GT---------------------------------A-------------------…	BcsFra31	BcsFra29	Bacteroides fragilis
>000007842|size:7046	0.0963938	96.5%:PpuAsac4;96.5%:PpuGross	Peptoniphilus asaccharolyticus	CC-T-AC-G-G-G-A-G-GC--A-GCA-G-T-G-G-G-G-A-A--TA-TT--GC-A-C---AA-T-G-G--AG--GG-A-A--C-T--C-T-GA-T-G-C-A--GC-G--------A--C-GCC-G-C-G-T---------G-A-A--C--GA-A-G--A-A-G-G-CT----TT-CG-----------A-G-T--------C-G-T--A---AA-G-T-TC------------------------------TT-TT-A-T--A-TGG----G--A-A--G---A-------------------------------------T---------------------AA-----------------------------------------------------…	PpuAsac4	PpuGross	Peptoniphilus asaccharolyticus
>000007308|size:6945	0.0959104	96.7%:BcsVul15;96.7%:BcsVul14		CC-T-AC-G-G-G-A-G-GC--A-GCA-G-T-G-A-G-G-A-A--TA-TT--GG-T-C---AA-T-G-G--GC--GA-G-A--G-C--C-T-GA-A-C-C-A--GC-C--------A--A-GTA-G-C-G-T---------G-A-A--G--GA-T-G--A-C-T-G-CC-C--TA-TG-----------G-G-T--------T-G-T--A---AA-C-T-TC------------------------------TT-TT-A-T--A-AAG----G--A-A--T---AA-AGTC-G---G-G-T--A------------------T---------------------GG---------------------------------A-------------------…	BcsVul15	BcsVul14	Bacteroides vulgatus
>000002699|size:3983	0.0954506	96.7%:EnrCl529;96.7%:EnrCl528		CC-T-AC-G-G-G-A-G-GC--A-GCA-G-T-G-G-G-G-A-A--TA-TT--GC-A-C---AA-T-G-G--GC--GC-A-A--G-C--C-T-GA-T-G-C-A--GC-C--------A--T-GCC-G-C-G-T---------G-T-A--T--GA-A-G--A-A-G-G-CC----TT-CG-----------G-G-T--------T-G-T--A---AA-G-T-AC------------------------------TT-TC-A-G--C-GGG----G--A-G--G---AA--GGT-G---T-T-G--A-G--G----------T--T---------------------AA---------------------------------T---A----A-------CC-…	EnrCl529	EnrCl528	Enterobacter cloacae
>000005169|size:6085	0.0938662	95.4%:StaEp124;95.4%:StaEp123		CC-T-AC-G-G-G-A-G-GC--A-GCA-G-T-A-G-G-G-A-A--TC-TT--CC-G-C---AA-T-G-G--GC--GA-A-A--G-C--C-T-GA-C-G-G-A--GC-A--------A--C-GCC-G-C-G-T---------G-A-G--T--GA-T-G--A-A-G-G-TC----TT-CG-----------G-A-T--------C-G-T--A---AA-A-C-TC------------------------------TG-TT-A-T--T-AGG----G--A-A--G---AA-CAAA-T---G-T-G--T-A--A----------G--T---------------------AA---------------------------------C--------T-------AT-…	StaEp124	StaEp123	Staphylococcus epidermidis
>000011521|size:6785	0.0936408	97.1%:HmhPar68;97.1%:HmhPar61	Haemophilus parainfluenzae	CC-T-AC-G-G-G-A-G-GC--A-GCA-G-T-G-G-G-G-A-A--TA-TT--GC-G-C---AA-T-G-G--GG--GC-A-A--C-C--C-T-GA-C-G-C-A--GC-C--------A--T-GCC-G-C-G-T---------G-A-A--T--GA-A-G--A-A-G-G-CC----TT-CG-----------G-G-T--------T-G-T--A---AA-G-T-TC------------------------------TT-TC-G-G--T-AGC----G--A-G--G---AA--GGC-A---T-T-T--A-G--T----------T--T---------------------AA---------------------------------T---A----G-------AC-…	HmhPar68	HmhPar61	Haemophilus parainfluenzae
>000006323|size:6867	0.091635	97.8%:KleOx242;97.8%:KleOx241		CC-T-AC-G-G-G-A-G-GC--A-GCA-G-T-G-G-G-G-A-A--TA-TT--GC-A-C---AA-T-G-G--GC--GC-A-A--G-C--C-T-GA-T-G-C-A--GC-C--------A--T-GCC-G-C-G-T---------G-T-A--T--GA-A-G--A-A-G-G-CC----TT-CG-----------G-G-T--------T-G-T--A---AA-G-T-AC------------------------------TT-TC-A-G--C-GGG----G--A-G--G---AA--GGC-G---A-T-A--A-G--G----------T--T---------------------AA---------------------------------T---A----A-------CC-…	KleOx242	KleOx241	Klebsiella oxytoca
>000010661|size:719	0.0912761	95.4%:StaAu564;95.4%:EntFa534		CC-T-AC-G-G-G-A-G-GC--A-GCA-G-T-A-G-G-G-A-A--TC-TT--CG-G-C---AA-T-G-G--AC--GA-A-A--G-T--C-T-GA-C-C-G-A--GC-A--------A--C-GCC-G-C-G-T---------G-A-G--T--GA-A-G--A-A-G-G-TT----TT-CG-----------G-A-T--------C-G-T--A---AA-A-C-TC------------------------------TG-TT-G-T--T-AGA----G--A-A--G---AA-CAAG-G---A-C-G--T-T--A----------G--T---------------------AA---------------------------------C--------T-------GA-…	StaAu564	EntFa534	Enterococcus faecalis
>000008250|size:8970	0.0910055	97.7%:AauSpe17;97.7%:AauSpe16	Anaerococcus provencensis	CC-T-AC-G-G-G-A-G-GC--A-GCA-G-T-G-G-G-G-A-A--TT-TT--GC-A-C---AA-T-G-G--GG--GC-A-A--C-C--C-T-GA-T-G-C-A--GC-G--------A--C-GCC-G-C-G-T---------G-A-T--T--TA---G--A-A-G-G-CC----TT-CG-----------G-G-T--------T-G-T--A---AA-A-A-TC------------------------------TT-TT-G-T--A-TAG----G--A-A--G---A-------------------------------------A---------------------AA-----------------------------------------------------…	AauSpe17	AauSpe16	Anaerococcus provencensis
>000007832|size:6247	0.0904474	97.0%:PpuHarei;94.2%:PpuRhini	Peptoniphilus harei	CC-T-AC-G-G-G-A-G-GC--A-GCA-G-T-G-G-G-G-A-A--TA-TT--GC-A-C---AA-T-G-G--AG--GG-A-A--C-T--C-T-GA-T-G-C-A--GC-G--------A--C-GCC-G-C-G-T---------G-A-A--C--GA-T-G--A-A-G-G-CT----TT-CG-----------A-G-T--------C-G-T--A---AA-G-T-TC------------------------------TT-TT-A-T--A-TGG----G--A-A--G---A-------------------------------------T---------------------AA-----------------------------------------------------…	PpuHarei	PpuRhini	Peptoniphilus harei
>000000918|size:400	0.0901291	65.2%:CorXer22;65.2%:CorFre19		CC-T-AC-G-G-G-A-G-GC--A-GCA-G-T-G-G-G-G-A-A--TA-TT--GC-A-C---AA-T-G-G--GC--GC-A-A--G-C--C-T-GA-T-G-C-A--GC-G--------A--C-GCC-G-C-G-T---------G-G-G--G--GA-T-G--A-C-G-G-CC----TT-CG-----------G-G-T--------T-G-T--A---AA-C-T-CC------------------------------TT-TC-A-G--C-CAT----G--A-C--G---AA--GCC-------------------------------CT--------------------TG---------------------------------T-------------------…	CorXer22	CorFre19	Corynebacterium kroppenstedtii
>000000872|size:5254	0.089463	96.6%:BifBre31;96.6%:BifBre30	Bifidobacterium breve	CC-T-AC-G-G-G-A-G-GC--A-GCA-G-T-G-G-G-G-A-A--TA-TT--GC-A-C---AA-T-G-G--GC--GC-A-A--G-C--C-T-GA-T-G-C-A--GC-G--------A--C-GCC-G-C-G-T---------G-A-G--G--GA-T-G--G-A-G-G-CC----TT-CG-----------G-G-T--------T-G-T--A---AA-C-C-TC------------------------------TT-TT-A-T--C-AGG----G--A-G--C---AA-GG-C-------------------------------T---------------------TC---------------------------------G-------------------…	BifBre31	BifBre30	Bifidobacterium breve
>000013621|size:1696	0.0869557	96.7%:PntAn107;96.7%:PntAn106		CC-T-AC-G-G-G-A-G-GC--A-GCA-G-T-G-G-G-G-A-A--TA-TT--GC-A-C---AA-T-G-G--GC--GC-A-A--G-C--C-T-GA-T-G-C-A--GC-C--------A--T-GCC-G-C-G-T---------G-T-A--T--GA-A-G--A-A-G-G-CC----TT-CG-----------G-G-T--------T-G-T--A---AA-G-T-AC------------------------------TT-TC-A-G--C-GGG----G--A-G--G---AA--GGC-G---A-T-G--T-G--G----------T--T---------------------AA---------------------------------T---A----A-------CC-…	PntAn107	PntAn106	Pantoea ananatis
>000005001|size:8304	0.0858131	97.8%:StaEp122;97.8%:StaCap17		CC-T-AC-G-G-G-A-G-GC--A-GCA-G-T-A-G-G-G-A-A--TC-TT--CC-G-C---AA-T-G-G--GC--GA-A-A--G-C--C-T-GA-C-G-G-A--GC-A--------A--C-GCC-G-C-G-T---------G-A-G--T--GA-A-G--A-A-G-G-TC----TT-CG-----------G-A-T--------C-G-T--A---AA-A-C-TC------------------------------TG-TT-A-T--T-AGG----G--A-A--G---AA-CAAA-T---G-T-G--T-A--A----------G--T---------------------AA---------------------------------C--------T-------AT-…	StaEp122	StaCap17	Staphylococcus epidermidis
>000013007|size:3509	0.0850868	95.4%:EnrCl498;95.4%:EnrCl489		CC-T-AC-G-G-G-A-G-GC--A-GCA-G-T-G-G-G-G-A-A--TA-TT--GC-A-C---AA-T-G-G--GC--GC-A-A--G-C--C-T-GA-T-G-C-A--GC-C--------A--T-GCC-G-C-G-T---------G-T-A--T--GA-A-G--A-A-G-G-CC----TT-CG-----------G-G-T--------T-G-T--A---AA-G-T-AC------------------------------TT-TC-A-G--C-GGG----G--A-G--G---AA--GGC-G---A-C-A--G-G--G----------T--T---------------------AA---------------------------------T---A----A-------CC-…	EnrCl498	EnrCl489	Enterobacter cloacae
>000005316|size:7504	0.0847215	95.2%:StaEp124;95.2%:StaEp123		CC-T-AC-G-G-G-A-G-GC--A-GCA-G-T-A-G-G-G-A-A--TC-TT--CC-G-C---AA-T-G-G--GC--GA-A-A--G-C--C-T-GA-C-G-G-A--GC-A--------A--C-GCC-G-C-G-T---------G-A-G--T--GA-T-G--A-A-G-G-TC----TT-CG-----------G-A-T--------C-G-T--A---AA-A-C-TC------------------------------TG-TT-A-T--T-AGG----G--A-A--G---AA-TAAA-T---G-T-G--T-A--A----------G--T---------------------AA---------------------------------C--------T-------AT-…	StaEp124	StaEp123	Staphylococcus epidermidis
>000011888|size:5634	0.0841713	96.7%:VeiSpe35;96.7%:VeiSpe33	Veillonella parvula	CC-T-AC-G-G-G-A-G-GC--A-GCA-G-T-G-G-G-G-A-A--TC-TT--CC-G-C---AA-T-G-G--AC--GA-A-A--G-T--C-T-GA-C-G-G-A--GC-A--------A--C-GCC-G-C-G-T---------G-A-G--T--GA-T-G--A-C-G-G-CC----TT-CG-----------G-G-T--------T-G-T--A---AA-G-C-TC------------------------------TG-TT-A-A--T-CGG----G--A-C--G---AA-AGGC-C---T-T-C--T-T--G----------C--G---------------------AA---------------------------------T---A----G-------TG-…	VeiSpe35	VeiSpe33	Veillonella parvula
>000003521|size:3978	0.0816907	96.7%:VeiSpe35;96.7%:VeiSpe33	Veillonella parvula	CC-T-AC-G-G-G-A-G-GC--A-GCA-G-T-G-G-G-G-A-A--TC-TT--CC-G-C---AA-T-G-G--AC--GA-A-A--G-T--C-T-GA-C-G-G-A--GC-A--------A--C-GCC-G-C-G-T---------G-A-G--T--GA-T-G--A-C-G-G-CC----TT-CG-----------G-G-T--------T-G-T--A---AA-G-C-TC------------------------------TG-TT-A-A--T-CGG----G--A-C--G---AA-AGGC-C---T-T-C--T-T--G----------C--G---------------------AA---------------------------------T---A----G-------TG-…	VeiSpe35	VeiSpe33	Veillonella parvula
>000010709|size:2739	0.0813051	99.8%:StaAu564;99.8%:EntFa534		CC-T-AC-G-G-G-A-G-GC--A-GCA-G-T-A-G-G-G-A-A--TC-TT--CG-G-C---AA-T-G-G--AC--GA-A-A--G-T--C-T-GA-C-C-G-A--GC-A--------A--C-GCC-G-C-G-T---------G-A-G--T--GA-A-G--A-A-G-G-TT----TT-CG-----------G-A-T--------C-G-T--A---AA-A-C-TC------------------------------TG-TT-G-T--T-AGA----G--A-A--G---AA-CAAG-G---A-C-G--T-T--A----------G--T---------------------AA---------------------------------C--------T-------GA-…	StaAu564	EntFa534	Enterococcus faecalis
>000011718|size:3657	0.0811946	96.7%:AcyUrog4;96.7%:AcyUrog3	Actinomyces urogenitalis	CC-T-AC-G-G-G-A-G-GC--A-GCA-G-T-G-G-G-G-A-A--TA-TT--GC-A-C---AA-T-G-G--GC--GC-A-A--G-C--C-T-GA-T-G-C-A--GC-G--------A--C-GCC-G-C-G-T---------G-A-G--G--GA-T-G--G-A-G-G-CC----TT-CG-----------G-G-T--------T-G-T--A---AA-C-C-TC------------------------------TT-TC-G-C--C-AGT----G--A-A--G---CA-GGCC-A---T-C-T--T------------------C---------------------TTT--------------------------------G---T---------------…	AcyUrog4	AcyUrog3	Actinomyces urogenitalis
>000007838|size:7045	0.0804496	97.0%:PpuRhini;97.0%:PpuGorba	Peptoniphilus gorbachii	CC-T-AC-G-G-G-A-G-GC--A-GCA-G-T-G-G-G-G-A-A--TA-TT--GC-A-C---AA-T-G-G--AG--GG-A-A--C-T--C-T-GA-T-G-C-A--GC-G--------A--C-GCC-G-C-G-T---------G-A-A--C--GA-A-G--A-A-G-G-CT----TT-CG-----------A-G-T--------C-G-T--A---AA-G-T-TC------------------------------TT-TT-A-T--A-TGG----G--A-A--G---A-------------------------------------T---------------------AA-----------------------------------------------------…	PpuRhini	PpuGorba	Peptoniphilus gorbachii
>000014248|size:2427	0.0797541	98.0%:StaAu564;98.0%:EntFa534		CC-T-AC-G-G-G-A-G-GC--A-GCA-G-T-A-G-G-G-A-A--TC-TT--CG-G-C---AA-T-G-G--AC--GA-A-A--G-T--C-T-GA-C-C-G-A--GC-A--------A--C-GCC-G-C-G-T---------G-A-G--T--GA-A-G--A-A-G-G-TT----TT-CG-----------G-A-T--------C-G-T--A---AA-A-C-TC------------------------------TG-TT-G-T--T-AGA----G--A-A--G---AA-CAAG-G---A-C-G--T-T--A----------G--T---------------------AA---------------------------------C--------T-------GA-…	StaAu564	EntFa534	Enterococcus faecalis
>000002691|size:5108	0.0795779	97.8%:CtbFre90;97.8%:CtbWerk5	Citrobacter freundii	CC-T-AC-G-G-G-A-G-GC--A-GCA-G-T-G-G-G-G-A-A--TA-TT--GC-A-C---AA-T-G-G--GC--GC-A-A--G-C--C-T-GA-T-G-C-A--GC-C--------A--T-GCC-G-C-G-T---------G-T-A--T--GA-A-G--A-A-G-G-CC----TT-CG-----------G-G-T--------T-G-T--A---AA-G-T-AC------------------------------TT-TC-A-G--C-GAG----G--A-G--G---AA--GGT-G---T-T-G--T-G--G----------T--T---------------------AA---------------------------------T---A----A-------CC-…	CtbFre90	CtbWerk5	Citrobacter freundii
>000013533|size:1000	0.0794645	97.8%:KleOx242;97.8%:KleOx241		CC-T-AC-G-G-G-A-G-GC--A-GCA-G-T-G-G-G-G-A-A--TA-TT--GC-A-C---AA-T-G-G--GC--GC-A-A--G-C--C-T-GA-T-G-C-A--GC-C--------A--T-GCC-G-C-G-T---------G-T-A--T--GA-A-G--A-A-G-G-CC----TT-CG-----------G-G-T--------T-G-T--A---AA-G-T-AC------------------------------TT-TC-A-G--C-GGG----G--A-G--G---AA--GGC-G---A-T-A--A-G--G----------T--T---------------------AA---------------------------------T---A----A-------CC-…	KleOx242	KleOx241	Klebsiella oxytoca
>000001166|size:6976	0.0773015	97.8%:KleP1014;97.8%:KleP1012		CC-T-AC-G-G-G-A-G-GC--A-GCA-G-T-G-G-G-G-A-A--TA-TT--GC-A-C---AA-T-G-G--GC--GC-A-A--G-C--C-T-GA-T-G-C-A--GC-C--------A--T-GCC-G-C-G-T---------G-T-G--T--GA-A-G--A-A-G-G-CC----TT-CG-----------G-G-T--------T-G-T--A---AA-G-C-AC------------------------------TT-TC-A-G--C-GGG----G--A-G--G---AA--GGC-G---T-T-A--A-G--G----------T--T---------------------AA---------------------------------T---A----A-------CC-…	KleP1014	KleP1012	Klebsiella pneumoniae
>000008554|size:4385	0.0766609	97.7%:SpnEchi8;97.7%:SpnAlpin		CC-T-AC-G-G-G-A-G-GC--A-GCA-G-T-G-G-G-G-A-A--TA-TT--GG-A-C---AA-T-G-G--GC--GA-A-A--G-C--C-T-GA-T-C-C-A--GC-A--------A--T-GCC-G-C-G-T---------G-A-G--T--GA-T-G--A-A-G-G-CC----TT-AG-----------G-G-T--------T-G-T--A---AA-G-C-TC------------------------------TT-TT-A-C--C-CGG----G--A-T--G---A-------------------------------------T---------------------AA-----------------------------------------------------…	SpnEchi8	SpnAlpin	Sphingomonas echinoides
>000005312|size:4344	0.075946	95.2%:StaEp124;95.2%:StaEp123		CC-T-AC-G-G-G-A-G-GC--A-GCA-G-T-A-G-G-G-A-A--TC-TT--CC-G-C---AA-T-G-G--GC--GA-A-A--G-C--C-T-GA-C-G-G-A--GC-A--------A--C-GCC-G-C-G-T---------G-A-G--T--GA-T-G--A-A-G-G-TC----TT-CG-----------G-A-T--------C-G-T--A---AA-A-C-TC------------------------------TG-TT-A-T--T-AGG----G--A-A--G---AA-TAAA-T---G-T-G--T-A--A----------G--T---------------------AA---------------------------------C--------T-------AT-…	StaEp124	StaEp123	Staphylococcus epidermidis
>000007151|size:6220	0.0758186	96.9%:BcsVul12;94.5%:BcsVul15	Bacteroides vulgatus	CC-T-AC-G-G-G-A-G-GC--A-GCA-G-T-G-A-G-G-A-A--TA-TT--GG-T-C---AA-T-G-G--GC--GA-G-A--G-C--C-T-GA-A-C-C-A--GC-C--------A--A-GTA-G-C-G-T---------G-A-A--G--GA-T-G--A-C-T-G-CC-C--TA-TG-----------G-G-T--------T-G-T--A---AA-C-T-TC------------------------------TT-TT-A-T--A-AAG----G--A-A--T---AA-AGTC-G---G-G-T--A------------------T---------------------GT---------------------------------A-------------------…	BcsVul12	BcsVul15	Bacteroides vulgatus
>000005831|size:14028	0.0751576	97.8%:Esch1431;97.8%:Esch1328	Escherichia/Shigella	CC-T-AC-G-G-G-A-G-GC--A-GCA-G-T-G-G-G-G-A-A--TA-TT--GC-A-C---AA-T-G-G--GC--GC-A-A--G-C--C-T-GA-T-G-C-A--GC-C--------A--T-GCC-G-C-G-T---------G-T-A--T--GA-A-G--A-A-G-G-CC----TT-CG-----------G-G-T--------T-G-T--A---AA-G-T-AC------------------------------TT-TC-A-G--C-GGG----G--A-G--G---AA--GGG-A---G-T-A--A-A--G----------T--T---------------------AA---------------------------------T---A----C-------CT-…	Esch1431	Esch1328	Escherichia/Shigella
>000011273|size:3923	0.0750622	92.9%:AcyRadin;66.7%:AcySuim2	Actinomyces radingae	CC-T-AC-G-G-G-A-G-GC--A-GCA-G-T-G-G-G-G-A-A--TT-TT--GC-A-C---AA-T-G-G--GG--GG-A-A--C-C--T-T-GA-T-G-C-A--GC-G--------A--C-GCC-G-C-G-T---------G-A-G--G--GA-T-G--G-A-G-G-CC----TT-CG-----------G-G-T--------T-G-T--G---AA-C-C-TC------------------------------TT-TC-G-C--T-CGT----G--T-G--C---AA--GCC-G---C-T-A--T-T---------------------------------------T---------------------------------G-----------------G-…	AcyRadin	AcySuim2	Actinomyces radingae
>000006873|size:3494	0.0735174	94.1%:KlePn578;94.1%:KlePn568		CC-T-AC-G-G-G-A-G-GC--A-GCA-G-T-G-G-G-G-A-A--TA-TT--GC-A-C---AA-T-G-G--GC--GC-A-A--G-C--C-T-GA-T-G-C-A--GC-C--------A--T-GCC-G-C-G-T---------G-T-G--T--GA-A-G--A-A-G-G-CC----TT-CG-----------G-G-T--------T-G-T--A---AA-G-C-AC------------------------------TT-TC-A-G--C-GGG----G--A-G--G---AA--GGC-G---C-T-A--A-G--G----------T--T---------------------AA---------------------------------T---A----A-------CC-…	KlePn578	KlePn568	Klebsiella pneumoniae
>000003168|size:3227	0.0735106	97.8%:UrpPar20;97.8%:UrpPar16	Ureaplasma parvum/urealyticum	CC-T-AC-G-G-G-A-G-GC--A-GCA-G-T-A-G-G-G-A-A--TT-TT--TC-A-C---AA-T-G-G--GC--GC-A-A--G-C--C-T-TA-T-G-A-A--GC-A--------A--T-GCC-G-C-G-T---------G-A-A--C--GA-T-G--A-A-G-G-TC----TTATA-----------G-A-T--------T-G-T--A---AA-G-T-TC------------------------------TT-TT-A-T--A-TGG----G--A-A--G---AA-ACGC-T---A-A-A--A-T--AG---------G--A---------------------AA------------------------------------------------T-GA-…	UrpPar20	UrpPar16	Ureaplasma parvum/urealyticum
>000012112|size:5206	0.073307	96.7%:StaEp124;96.7%:StaEp123		CC-T-AC-G-G-G-A-G-GC--A-GCA-G-T-A-G-G-G-A-A--TC-TT--CC-G-C---AA-T-G-G--GC--GA-A-A--G-C--C-T-GA-C-G-G-A--GC-A--------A--C-GCC-G-C-G-T---------G-A-G--T--GA-T-G--A-A-G-G-TC----TT-CG-----------G-A-T--------C-G-T--A---AA-A-C-TC------------------------------TG-TT-A-T--T-AGG----G--A-A--G---AA-CAAA-T---G-T-G--T-A--A----------G--T---------------------AA---------------------------------C--------T-------AT-…	StaEp124	StaEp123	Staphylococcus epidermidis
>000004767|size:4742	0.072526	99.8%:StaEpi99;99.8%:StaEpi80		CC-T-AC-G-G-G-A-G-GC--A-GCA-G-T-A-G-G-G-A-A--TC-TT--CC-G-C---AA-T-G-G--GC--GA-A-A--G-C--T-T-GA-C-G-G-A--GC-A--------A--C-GCC-G-C-G-T---------G-A-G--T--GA-T-G--A-A-G-G-TC----TT-CG-----------G-A-T--------C-G-T--A---AA-A-C-TC------------------------------TG-TT-A-T--T-AGG----G--A-A--G---AA-CAAA-T---G-T-G--T-A--A----------G--T---------------------AA---------------------------------C--------T-------AT-…	StaEpi99	StaEpi80	Staphylococcus epidermidis
>000007040|size:5200	0.0719702	99.8%:KleVar40;99.8%:KlePn961	Klebsiella pneumoniae	CC-T-AC-G-G-G-A-G-GC--A-GCA-G-T-G-G-G-G-A-A--TA-TT--GC-A-C---AA-T-G-G--GC--GC-A-A--G-C--C-T-GA-T-G-C-A--GC-C--------A--T-GCC-G-C-G-T---------G-T-G--T--GA-A-G--A-A-G-G-CC----TT-CG-----------G-G-T--------T-G-T--A---AA-G-C-AC------------------------------TT-TC-A-G--C-GGG----G--A-G--G---AA--GGC-G---G-T-G--A-G--G----------T--T---------------------AA---------------------------------T---A----A-------CC-…	KleVar40	KlePn961	Klebsiella pneumoniae
>000005154|size:6757	0.0705215	95.4%:StaEp124;95.4%:StaEp123		CC-T-AC-G-G-G-A-G-GC--A-GCA-G-T-A-G-G-G-A-A--TC-TT--CC-G-C---AA-T-G-G--GC--GA-A-A--G-C--C-T-GA-C-G-G-A--GC-A--------A--C-GCC-G-C-G-T---------G-A-G--T--GA-T-G--A-A-G-G-TC----TT-CG-----------G-A-T--------C-G-T--A---AA-A-C-TC------------------------------TG-TT-A-T--T-AGG----G--A-A--G---AA-TAAA-T---G-T-G--T-A--A----------G--T---------------------AA---------------------------------C--------T-------AT-…	StaEp124	StaEp123	Staphylococcus epidermidis
>000002925|size:3033	0.0702979	96.7%:RalPic28;96.7%:RalPic27		CC-T-AC-G-G-G-A-G-GC--A-GCA-G-T-G-G-G-G-A-A--TT-TT--GG-A-C---AA-T-G-G--GC--GA-A-A--G-C--C-T-GA-T-C-C-A--GC-A--------A--T-GCC-G-C-G-T---------G-T-G--T--GA-A-G--A-A-G-G-CC----TT-CG-----------G-G-T--------T-G-T--A---AA-G-C-AC------------------------------TT-TT-G-T--C-CGG----A--A-A--G---AA--ATG-G---C-T-C--T-G--G----------T--T---------------------AA---------------------------------T---A----C-------CT-…	RalPic28	RalPic27	Ralstonia pickettii
>000002914|size:4508	0.0688778	97.8%:RalPic28;97.8%:RalPic27	Ralstonia pickettii	CC-T-AC-G-G-G-A-G-GC--A-GCA-G-T-G-G-G-G-A-A--TT-TT--GG-A-C---AA-T-G-G--GC--GA-A-A--G-C--C-T-GA-T-C-C-A--GC-A--------A--T-GCC-G-C-G-T---------G-T-G--T--GA-A-G--A-A-G-G-CC----TT-CG-----------G-G-T--------T-G-T--A---AA-G-C-AC------------------------------TT-TT-G-T--C-CGG----A--A-A--G---AA--ATG-G---C-T-C--T-G--G----------T--T---------------------AA---------------------------------T---A----C-------CT-…	RalPic28	RalPic27	Ralstonia pickettii
>000008713|size:213	0.0675631	97.0%:ClsTert4;97.0%:ClsTert3		CC-T-AC-G-G-G-A-G-GC--A-GCA-G-T-G-G-G-G-A-A--TA-TT--GC-A-C---AA-T-G-G--GG--GA-A-A--C-C--C-T-GA-T-G-C-A--GC-A--------A--C-GCC-G-C-G-T---------G-A-G--T--GA-T-G--A-A-G-G-TT----TT-CG-----------G-A-T--------C-G-T--A---AA-G-C-TC------------------------------TG-TC-T-T--C-AGG----G--A-C--G---A-------------------------------------T---------------------AA-----------------------------------------------------…	ClsTert4	ClsTert3	Clostridium tertium
>000009577|size:2937	0.0672275	96.7%:PbdDis24;93.8%:PbdDist6	Parabacteroides distasonis	CC-T-AC-G-G-G-A-G-GC--A-GCA-G-T-G-A-G-G-A-A--TA-TT--GG-T-C---AA-T-G-G--GC--GC-G-A--G-C--C-T-GA-A-C-C-A--GC-C--------A--A-GTC-G-C-G-T---------G-A-G--G--GA-T-G--A-A-G-G-TT-C--TA-TG-----------G-A-T--------C-G-T--A---AA-C-C-TC------------------------------TT-TT-A-T--A-AGG----G--A-A--T---AA-AGTG-C---G-G-G--A------------------C---------------------GT---------------------------------G-------------------…	PbdDis24	PbdDist6	Parabacteroides distasonis
>000001788|size:4876	0.067147	94.0%:PpcDi104;94.0%:PbdDis16	Parabacteroides distasonis	CC-T-AC-G-G-G-A-G-GC--A-GCA-G-T-G-A-G-G-A-A--TA-TT--GG-T-C---AA-T-G-G--CC--GA-G-A--G-G--C-T-GA-A-C-C-A--GC-C--------A--A-GTC-G-C-G-T---------G-A-G--G--GA-T-G--A-A-G-G-TT-C--TA-TG-----------G-A-T--------C-G-T--A---AA-C-C-TC------------------------------TT-TT-A-T--A-AGG----G--A-A--T---AA-AGTG-C---G-G-G--A------------------C---------------------GT---------------------------------G-------------------…	PpcDi104	PbdDis16	Parabacteroides distasonis
>000013006|size:2540	0.0660437	95.4%:EnrCl498;95.4%:EnrCl489		CC-T-AC-G-G-G-A-G-GC--A-GCA-G-T-G-G-G-G-A-A--TA-TT--GC-A-C---AA-T-G-G--GC--GC-A-A--G-C--C-T-GA-T-G-C-A--GC-C--------A--T-GCC-G-C-G-T---------G-T-A--T--GA-A-G--A-A-G-G-CC----TT-CG-----------G-G-T--------T-G-T--A---AA-G-T-AC------------------------------TT-TC-A-G--C-GGG----G--A-G--G---AA--GGC-G---A-C-A--G-G--G----------T--T---------------------AA---------------------------------T---A----A-------CC-…	EnrCl498	EnrCl489	Enterobacter cloacae
>000003855|size:4148	0.0659566	97.8%:DftAci28;97.8%:DftAci27	Delftia acidovorans	CC-T-AC-G-G-G-A-G-GC--A-GCA-G-T-G-G-G-G-A-A--TT-TT--GG-A-C---AA-T-G-G--GC--GA-A-A--G-C--C-T-GA-T-C-C-A--GC-A--------A--T-GCC-G-C-G-T---------G-C-A--G--GA-T-G--A-A-G-G-CC----TT-CG-----------G-G-T--------T-G-T--A---AA-C-T-GC------------------------------TT-TT-G-T--A-CGG----A--A-C--G---AA--AAA-G---C-T-T--C-T--C----------C--T---------------------AA---------------------------------T---A----C-------GA-…	DftAci28	DftAci27	Delftia acidovorans
>000006475|size:4517	0.0653909	99.8%:KleP1002;99.8%:KlePn925		CC-T-AC-G-G-G-A-G-GC--A-GCA-G-T-G-G-G-G-A-A--TA-TT--GC-A-C---AA-T-G-G--GC--GC-A-A--G-C--C-T-GA-T-G-C-A--GC-C--------A--T-GCC-G-C-G-T---------G-T-G--T--GA-A-G--A-A-G-G-CC----TT-CG-----------G-G-T--------T-G-T--A---AA-G-C-AC------------------------------TT-TC-A-G--C-GGG----G--A-G--G---AA--GGC-G---A-T-A--A-G--G----------T--T---------------------AA---------------------------------T---A----A-------CC-…	KleP1002	KlePn925	Klebsiella pneumoniae
>000007833|size:3402	0.0651782	96.5%:PpuHarei;93.7%:PpuRhini		CC-T-AC-G-G-G-A-G-GC--A-GCA-G-T-G-G-G-G-A-A--TA-TT--GC-A-C---AA-T-G-G--AG--GG-A-A--C-T--C-T-GA-T-G-C-A--GC-G--------A--C-GCC-G-C-G-T---------G-A-A--C--GA-T-G--A-A-G-G-CT----TT-CG-----------A-G-T--------C-G-T--A---AA-G-T-TC------------------------------TT-TT-A-T--A-TGG----G--A-A--G---A-------------------------------------T---------------------AA-----------------------------------------------------…	PpuHarei	PpuRhini	Peptoniphilus harei
>000001741|size:2867	0.0651635	96.7%:BcsFra31;96.7%:BcsFra29		CC-T-AC-G-G-G-A-G-GC--A-GCA-G-T-G-A-G-G-A-A--TA-TT--GG-T-C---AA-T-G-G--GC--GG-T-A--G-C--C-T-GA-A-C-C-A--GC-C--------A--A-GTA-G-C-G-T---------G-A-A--G--GA-T-G--A-A-G-G-CT-C--TA-TG-----------G-G-T--------C-G-T--A---AA-C-T-TC------------------------------TT-TT-A-T--A-TAA----G--A-A--T---AA-AGTG-C---A-G-T--A------------------T---------------------GT---------------------------------A-------------------…	BcsFra31	BcsFra29	Bacteroides fragilis
>000006878|size:5744	0.065125	96.7%:KlePn623;94.1%:KlePn770	Klebsiella pneumoniae	CC-T-AC-G-G-G-A-G-GC--A-GCA-G-T-G-G-G-G-A-A--TA-TT--GC-A-C---AA-T-G-G--GC--GC-A-A--G-C--C-T-GA-T-G-C-A--GC-C--------A--T-GCC-G-C-G-T---------G-T-G--T--GA-A-G--A-A-G-G-CC----TT-CG-----------G-G-T--------T-G-T--A---AA-G-C-AC------------------------------TT-TC-A-G--C-GGG----G--A-G--G---AA--GGC-G---C-C-A--A-G--G----------T--T---------------------AA---------------------------------T---A----A-------CC-…	KlePn623	KlePn770	Klebsiella pneumoniae
>000006990|size:4614	0.0648164	96.7%:KleP1002;96.7%:KlePn925		CC-T-AC-G-G-G-A-G-GC--A-GCA-G-T-G-G-G-G-A-A--TA-TT--GC-A-C---AA-T-G-G--GC--GC-A-A--G-C--C-T-GA-T-G-C-A--GC-C--------A--T-GCC-G-C-G-T---------G-T-G--T--GA-A-G--A-A-G-G-CC----TT-CG-----------G-G-T--------T-G-T--A---AA-G-C-AC------------------------------TT-TC-A-G--C-GGG----G--A-G--G---AA--GGC-G---A-T-A--A-G--G----------T--T---------------------AA---------------------------------T---A----A-------CC-…	KleP1002	KlePn925	Klebsiella pneumoniae
>000015910|size:6824	0.0629499	98.0%:StaEp124;98.0%:StaEp123		CC-T-AC-G-G-G-A-G-GC--A-GCA-G-T-A-G-G-G-A-A--TC-TT--CC-G-C---AA-T-G-G--GC--GA-A-A--G-C--C-T-GA-C-G-G-A--GC-A--------A--C-GCC-G-C-G-T---------G-A-G--T--GA-T-G--A-A-G-G-TC----TT-CG-----------G-A-T--------C-G-T--A---AA-A-C-TC------------------------------TG-TT-A-T--T-AGG----G--A-A--G---AA-CAAA-T---G-T-G--T-A--A----------G--T---------------------AA---------------------------------C--------T-------AT-…	StaEp124	StaEp123	Staphylococcus epidermidis
>000008302|size:2761	0.0628352	96.5%:RmnGna13;96.5%:RmnGna10	[Ruminococcus] gnavus	CC-T-AC-G-G-G-A-G-GC--A-GCA-G-T-G-G-G-G-A-A--TA-TT--GC-A-C---AA-T-G-G--GG--GA-A-A--C-C--C-T-GA-T-G-C-A--GC-G--------A--C-GCC-G-C-G-T---------G-A-G--C--GA-T-G--A-A-G-T-AT----TT-CG-----------G-T-A--------T-G-T--A---AA-G-C-TC------------------------------TA-TC-A-G--C-AGG----G--A-A--G---A-------------------------------------A---------------------AA-----------------------------------------------------…	RmnGna13	RmnGna10	[Ruminococcus] gnavus
>000007906|size:3263	0.0621504	96.5%:FinMag11;96.5%:FinMag10		CC-T-AC-G-G-G-A-G-GC--A-GCA-G-T-G-G-G-G-A-A--TA-TT--GC-A-C---AA-T-G-G--GG--GA-A-A--C-C--C-T-GA-T-G-C-A--GC-G--------A--C-GCC-G-C-G-T---------G-A-A--C--GA-A-G--A-A-G-G-TA----TT-CG-----------T-A-T--------C-G-T--A---AA-G-T-TC------------------------------TG-TC-C-T--A-TGG----G--A-A--G---A-------------------------------------T---------------------AA-----------------------------------------------------…	FinMag11	FinMag10	Finegoldia magna
>000011000|size:2355	0.0615189	96.7%:KleOx234;96.7%:KleOx231		CC-T-AC-G-G-G-A-G-GC--A-GCA-G-T-G-G-G-G-A-A--TA-TT--GC-A-C---AA-T-G-G--GC--GC-A-A--G-C--C-T-GA-T-G-C-A--GC-C--------A--T-GCC-G-C-G-T---------G-T-A--T--GA-A-G--A-A-G-G-CC----TT-CG-----------G-G-T--------T-G-T--A---AA-G-T-AC------------------------------TT-TC-A-G--C-GGG----G--A-G--G---AA--GGT-G---T-T-G--A-G--G----------T--T---------------------AA---------------------------------T---A----A-------CC-…	KleOx234	KleOx231	Klebsiella oxytoca
>000004908|size:6165	0.0602957	97.8%:StaEpi99;97.8%:StaEpi80		CC-T-AC-G-G-G-A-G-GC--A-GCA-G-T-A-G-G-G-A-A--TC-TT--CC-G-C---AA-T-G-G--GC--GA-A-A--G-C--T-T-GA-C-G-G-A--GC-A--------A--C-GCC-G-C-G-T---------G-A-G--T--GA-T-G--A-A-G-G-TC----TT-CG-----------G-A-T--------C-G-T--A---AA-A-C-TC------------------------------TG-TT-A-T--T-AGG----G--A-A--G---AA-CAAA-T---G-T-G--T-A--A----------G--T---------------------AA---------------------------------C--------T-------AT-…	StaEpi99	StaEpi80	Staphylococcus epidermidis
>000005976|size:2803	0.0598667	97.8%:KleOx239;97.8%:KleOx235		CC-T-AC-G-G-G-A-G-GC--A-GCA-G-T-G-G-G-G-A-A--TA-TT--GC-A-C---AA-T-G-G--GC--GC-A-A--G-C--C-T-GA-T-G-C-A--GC-C--------A--T-GCC-G-C-G-T---------G-T-A--T--GA-A-G--A-A-G-G-CC----TT-CG-----------G-G-T--------T-G-T--A---AA-G-T-AC------------------------------TT-TC-A-G--C-GGG----G--A-G--G---AA--GGG-A---G-T-G--A-G--G----------T--T---------------------AA---------------------------------T---A----A-------CC-…	KleOx239	KleOx235	Klebsiella oxytoca
>000001127|size:4316	0.0596472	96.7%:KlePn881;96.7%:KlePn761		CC-T-AC-G-G-G-A-G-GC--A-GCA-G-T-G-G-G-G-A-A--TA-TT--GC-A-C---AA-T-G-G--GC--GC-A-A--G-C--C-T-GA-T-G-C-A--GC-C--------A--T-GCC-G-C-G-T---------G-T-G--T--GA-A-G--A-A-G-G-CC----TT-CG-----------G-G-T--------T-G-T--A---AA-G-C-AC------------------------------TT-TC-A-G--C-GGG----G--A-G--G---AA--GGC-G---G-T-G--A-G--G----------T--T---------------------AA---------------------------------T---A----A-------CC-…	KlePn881	KlePn761	Klebsiella pneumoniae
>000012605|size:7990	0.0577879	94.1%:ShiSon39;94.1%:Esch1638		CC-T-AC-G-G-G-A-G-GC--A-GCA-G-T-G-G-G-G-A-A--TA-TT--GC-A-C---AA-T-G-G--GC--GC-A-A--G-C--C-T-GA-T-G-C-A--GC-C--------A--T-GCC-G-C-G-T---------G-T-A--T--GA-A-G--A-A-G-G-CC----TT-CG-----------G-G-T--------T-G-T--A---AA-G-T-AC------------------------------TT-TC-A-G--C-GGG----G--A-G--G---AA--GGG-A---G-T-A--A-A--G----------T--T---------------------AA---------------------------------T---A----C-------CT-…	ShiSon39	Esch1638	Escherichia/Shigella
>000008536|size:2342	0.057004	96.5%:SpnEchi8;96.5%:SpnAlpin		CC-T-AC-G-G-G-A-G-GC--A-GCA-G-T-G-G-G-G-A-A--TA-TT--GG-A-C---AA-T-G-G--GC--GA-A-A--G-C--C-T-GA-T-C-C-A--GC-A--------A--T-GCC-G-C-G-T---------G-A-G--T--GA-T-G--A-A-G-G-CC----TT-AG-----------G-G-T--------T-G-T--A---AA-G-C-TC------------------------------TT-TT-A-C--C-CGG----G--A-T--G---A-------------------------------------T---------------------AA-----------------------------------------------------…	SpnEchi8	SpnAlpin	Sphingomonas echinoides
>000001660|size:2864	0.0563665	97.1%:StaHae56;97.1%:StaEpi93		CC-T-AC-G-G-G-A-G-GC--A-GCA-G-T-A-G-G-G-A-A--TC-TT--CC-G-C---AA-T-G-G--GC--GA-A-A--G-C--C-T-GA-C-G-G-A--GC-A--------A--C-GCC-G-C-G-T---------G-A-G--T--GA-T-G--A-A-G-G-TC----TT-CG-----------G-A-T--------C-G-T--A---AA-A-C-TC------------------------------TG-TT-A-T--T-AGG----G--A-A--G---AA-CATA-C---A-T-G--T-A--A----------G--T---------------------AA---------------------------------C--------T-------AT-…	StaHae56	StaEpi93	Staphylococcus haemolyticus
>000006326|size:5737	0.0560219	97.8%:KleP1010;97.8%:KleVar41		CC-T-AC-G-G-G-A-G-GC--A-GCA-G-T-G-G-G-G-A-A--TA-TT--GC-A-C---AA-T-G-G--GC--GC-A-A--G-C--C-T-GA-T-G-C-A--GC-C--------A--T-GCC-G-C-G-T---------G-T-G--T--GA-A-G--A-A-G-G-CC----TT-CG-----------G-G-T--------T-G-T--A---AA-G-C-AC------------------------------TT-TC-A-G--C-GGG----G--A-G--G---AA--GGC-G---A-T-A--A-G--G----------T--T---------------------AA---------------------------------T---A----A-------CC-…	KleP1010	KleVar41	Klebsiella pneumoniae
>000005357|size:4859	0.0558392	94.1%:StaEp124;94.1%:StaEp123		CC-T-AC-G-G-G-A-G-GC--A-GCA-G-T-A-G-G-G-A-A--TC-TT--CC-G-C---AA-T-G-G--GC--GA-A-A--G-C--C-T-GA-C-G-G-A--GC-A--------A--C-GCC-G-C-G-T---------G-A-G--T--GA-T-G--A-A-G-G-TC----TT-CG-----------G-A-T--------C-G-T--A---AA-A-C-TC------------------------------TG-TT-A-T--T-AGG----G--A-A--G---AA-TAAA-T---G-T-G--T-A--A----------G--T---------------------AA---------------------------------C--------T-------AT-…	StaEp124	StaEp123	Staphylococcus epidermidis
>000002385|size:4151	0.0557703	97.1%:SttMit48;97.1%:SttMit46	Streptococcus mitis	CC-T-AC-G-G-G-A-G-GC--A-GCA-G-T-A-G-G-G-A-A--TC-TT--CG-G-C---AA-T-G-G--AC--GG-A-A--G-T--C-T-GA-C-C-G-A--GC-A--------A--C-GCC-G-C-G-T---------G-A-G--T--GA-A-G--A-A-G-G-TT----TT-CG-----------G-A-T--------C-G-T--A---AA-G-C-TC------------------------------TG-TT-G-T--A-AGA----G--A-A--G---AA-CGAG-T---G-T-G--A-G--A----------G--T---------------------GG---------------------------------A---A----A-------GT-…	SttMit48	SttMit46	Streptococcus mitis
>000004749|size:4474	0.0557589	95.2%:StaEp124;95.2%:StaEp123		CC-T-AC-G-G-G-A-G-GC--A-GCA-G-T-A-G-G-G-A-A--TC-TT--CC-G-C---AA-T-G-G--GC--GA-A-A--G-C--C-T-GA-C-G-G-A--GC-A--------A--C-GCC-G-C-G-T---------G-A-G--T--GA-T-G--A-A-G-G-TC----TT-CG-----------G-A-T--------C-G-T--A---AA-A-C-TC------------------------------TG-TT-A-T--T-AGG----G--A-A--G---AA-CAAA-T---G-T-G--T-A--A----------G--T---------------------AA---------------------------------C--------T-------AT-…	StaEp124	StaEp123	Staphylococcus epidermidis
>000006931|size:3529	0.0555843	96.7%:PntAg246;94.1%:PntSep13	Pantoea agglomerans	CC-T-AC-G-G-G-A-G-GC--A-GCA-G-T-G-G-G-G-A-A--TA-TT--GC-A-C---AA-T-G-G--GC--GC-A-A--G-C--C-T-GA-T-G-C-A--GC-C--------A--T-GCC-G-C-G-T---------G-T-A--T--GA-A-G--A-A-G-G-CC----TT-CG-----------G-G-T--------T-G-T--A---AA-G-T-AC------------------------------TT-TC-A-G--C-GGG----G--A-G--G---AA--GGC-G---A-C-G--T-G--G----------T--T---------------------AA---------------------------------T---A----A-------CC-…	PntAg246	PntSep13	Pantoea agglomerans
>000004041|size:3682	0.0541946	98.0%:AciPit27;98.0%:AciPit26	Acinetobacter pittii	CC-T-AC-G-G-G-A-G-GC--A-GCA-G-T-G-G-G-G-A-A--TA-TT--GG-A-C---AA-T-G-G--GC--GC-A-A--G-C--C-T-GA-T-C-C-A--GC-C--------A--T-GCC-G-C-G-T---------G-T-G--T--GA-A-G--A-A-G-G-CC----TT-AT-----------G-G-T--------T-G-T--A---AA-G-C-AC------------------------------TT-TA-A-G--C-GAG----G--A-G--G---AG--GCT-A---C-T-T--T-A--G----------T--T---------------------AA---------------------------------T---A----C-------CT-…	AciPit27	AciPit26	Acinetobacter pittii
>000013580|size:6205	0.0541701	98.0%:KleP1002;98.0%:KlePn925		CC-T-AC-G-G-G-A-G-GC--A-GCA-G-T-G-G-G-G-A-A--TA-TT--GC-A-C---AA-T-G-G--GC--GC-A-A--G-C--C-T-GA-T-G-C-A--GC-C--------A--T-GCC-G-C-G-T---------G-T-G--T--GA-A-G--A-A-G-G-CC----TT-CG-----------G-G-T--------T-G-T--A---AA-G-C-AC------------------------------TT-TC-A-G--C-GGG----G--A-G--G---AA--GGC-G---A-T-A--A-G--G----------T--T---------------------AA---------------------------------T---A----A-------CC-…	KleP1002	KlePn925	Klebsiella pneumoniae
>000000868|size:3591	0.0537492	96.6%:BifScar6;96.6%:BifScar5		CC-T-AC-G-G-G-A-G-GC--A-GCA-G-T-G-G-G-G-A-A--TA-TT--GC-A-C---AA-T-G-G--GC--GC-A-A--G-C--C-T-GA-T-G-C-A--GC-G--------A--C-GCC-G-C-G-T---------G-A-G--G--GA-T-G--G-A-G-G-CC----TT-CG-----------G-G-T--------T-G-T--A---AA-C-C-TC------------------------------TT-TT-A-G--C-AGG----G--A-G--C---AA-GG-C-------------------------------T---------------------TC---------------------------------G-------------------…	BifScar6	BifScar5	Bifidobacterium scardovii
>000003865|size:2766	0.0535429	96.7%:DftAci28;96.7%:DftAci27		CC-T-AC-G-G-G-A-G-GC--A-GCA-G-T-G-G-G-G-A-A--TT-TT--GG-A-C---AA-T-G-G--GC--GA-A-A--G-C--C-T-GA-T-C-C-A--GC-A--------A--T-GCC-G-C-G-T---------G-C-A--G--GA-T-G--A-A-G-G-CC----TT-CG-----------G-G-T--------T-G-T--A---AA-C-T-GC------------------------------TT-TT-G-T--A-CGG----A--A-C--G---AA--AAA-G---C-T-T--C-T--C----------C--T---------------------AA---------------------------------T---A----C-------GA-…	DftAci28	DftAci27	Delftia acidovorans
>000005474|size:4321	0.0535333	94.1%:KleOx153;94.1%:KleOx103	Klebsiella oxytoca	CC-T-AC-G-G-G-A-G-GC--A-GCA-G-T-G-G-G-G-A-A--TA-TT--GC-A-C---AA-T-G-G--GC--GC-A-A--G-C--C-T-GA-T-G-C-A--GC-C--------A--T-GCC-G-C-G-T---------G-T-A--T--GA-A-G--A-A-G-G-CC----TT-CG-----------G-G-T--------T-G-T--A---AA-G-T-AC------------------------------TT-TC-A-G--C-GGG----G--A-G--G---AA--GGG-A---G-T-A--A-G--G----------T--T---------------------AA---------------------------------T---A----A-------CC-…	KleOx153	KleOx103	Klebsiella oxytoca
>000001773|size:4042	0.0535066	98.0%:BcsFra31;98.0%:BcsFra29		CC-T-AC-G-G-G-A-G-GC--A-GCA-G-T-G-A-G-G-A-A--TA-TT--GG-T-C---AA-T-G-G--GC--GG-T-A--G-C--C-T-GA-A-C-C-A--GC-C--------A--A-GTA-G-C-G-T---------G-A-A--G--GA-T-G--A-A-G-G-CT-C--TA-TG-----------G-G-T--------C-G-T--A---AA-C-T-TC------------------------------TT-TT-A-T--A-TAA----G--A-A--T---AA-AGTG-C---A-G-T--A------------------T---------------------GT---------------------------------A-------------------…	BcsFra31	BcsFra29	Bacteroides fragilis
>000007615|size:3276	0.0532454	97.1%:KleP1014;97.1%:KleP1012		CC-T-AC-G-G-G-A-G-GC--A-GCA-G-T-G-G-G-G-A-A--TA-TT--GC-A-C---AA-T-G-G--GC--GC-A-A--G-C--C-T-GA-T-G-C-A--GC-C--------A--T-GCC-G-C-G-T---------G-T-G--T--GA-A-G--A-A-G-G-CC----TT-CG-----------G-G-T--------T-G-T--A---AA-G-C-AC------------------------------TT-TC-A-G--C-GGG----G--A-G--G---AA--GGC-G---T-T-A--A-G--G----------T--T---------------------AA---------------------------------T---A----A-------CC-…	KleP1014	KleP1012	Klebsiella pneumoniae
>000003687|size:2280	0.0529779	96.6%:CorSimu5;96.6%:CorSimu4		CC-T-AC-G-G-G-A-G-GC--A-GCA-G-T-G-G-G-G-A-A--TA-TT--GC-A-C---AA-T-G-G--GC--GG-A-A--G-C--C-T-GA-T-G-C-A--GC-G--------A--C-GCC-G-C-G-T---------G-G-G--G--GA-T-G--A-A-G-G-CC----TT-CG-----------G-G-T--------T-G-T--A---AA-C-T-CC------------------------------TT-TC-G-A--C-AGG----G--A-C--G---AA--G-C-------------------------------T---------------------TT-----------------------------------------------------…	CorSimu5	CorSimu4	Corynebacterium simulans
>000000853|size:2258	0.0524673	97.0%:BifLon65;97.0%:BifLon64		CC-T-AC-G-G-G-A-G-GC--A-GCA-G-T-G-G-G-G-A-A--TA-TT--GC-A-C---AA-T-G-G--GC--GC-A-A--G-C--C-T-GA-T-G-C-A--GC-G--------A--C-GCC-G-C-G-T---------G-A-G--G--GA-T-G--G-A-G-G-CC----TT-CG-----------G-G-T--------T-G-T--A---AA-C-C-TC------------------------------TT-TT-A-T--C-GGG----G--A-G--C---AA--G-C-------------------------------G---------------------TG---------------------------------A-------------------…	BifLon65	BifLon64	Bifidobacterium longum subsp. Infantis
>000015592|size:196	0.0524147	95.4%:StaEp124;95.4%:StaEp123		CC-T-AC-G-G-G-A-G-GC--A-GCA-G-T-A-G-G-G-A-A--TC-TT--CC-G-C---AA-T-G-G--GC--GA-A-A--G-C--C-T-GA-C-G-G-A--GC-A--------A--C-GCC-G-C-G-T---------G-A-G--T--GA-T-G--A-A-G-G-TC----TT-CG-----------G-A-T--------C-G-T--A---AA-A-C-TC------------------------------TG-TT-A-T--T-AGG----G--A-A--G---AA-CAAA-T---G-T-G--T-A--A----------G--T---------------------AA---------------------------------C--------T-------AT-…	StaEp124	StaEp123	Staphylococcus epidermidis
>000014209|size:243	0.0508021	97.8%:StaAu564;97.8%:EntFa534		CC-T-AC-G-G-G-A-G-GC--A-GCA-G-T-A-G-G-G-A-A--TC-TT--CG-G-C---AA-T-G-G--AC--GA-A-A--G-T--C-T-GA-C-C-G-A--GC-A--------A--C-GCC-G-C-G-T---------G-A-G--T--GA-A-G--A-A-G-G-TT----TT-CG-----------G-A-T--------C-G-T--A---AA-A-C-TC------------------------------TG-TT-G-T--T-AGA----G--A-A--G---AA-CAAG-G---A-C-G--T-T--A----------G--T---------------------AA---------------------------------C--------T-------GA-…	StaAu564	EntFa534	Enterococcus faecalis
>000002149|size:3254	0.0504506	96.7%:UndOligo;90.1%:BacPH120		CC-T-AC-G-G-G-A-G-GC--A-GCA-G-T-G-G-G-G-A-A--TT-TT--GG-A-C---AA-T-G-G--GG--GC-A-A--C-C--C-T-GA-T-C-C-A--GC-A--------A--T-GCC-G-C-G-T---------G-A-G--T--GA-A-G--A-A-G-G-CC----CT-CG-----------G-G-T--------T-G-T--A---AA-G-C-TC------------------------------TT-TT-G-T--C-AGG----G--A-A--G---AA--ACG-G---A-G-T--T-C--T----------C--T---------------------AA---------------------------------T---A----T-------AG-…	UndOligo	BacPH120	Undibacterium oligocarboniphilum
>000004803|size:4975	0.0504475	94.1%:StaEp124;94.1%:StaEp123		CC-T-AC-G-G-G-A-G-GC--A-GCA-G-T-A-G-G-G-A-A--TC-TT--CC-G-C---AA-T-G-G--GC--GA-A-A--G-C--C-T-GA-C-G-G-A--GC-A--------A--C-GCC-G-C-G-T---------G-A-G--T--GA-T-G--A-A-G-G-TC----TT-CG-----------G-A-T--------C-G-T--A---AA-A-C-TC------------------------------TG-TT-A-T--T-AGG----G--A-A--G---AA-CAAA-T---G-T-G--T-A--A----------G--T---------------------AA---------------------------------C--------T-------AT-…	StaEp124	StaEp123	Staphylococcus epidermidis
>000010149|size:3249	0.0504044	97.8%:SttSa536;97.8%:SttSa535		CC-T-AC-G-G-G-A-G-GC--A-GCA-G-T-A-G-G-G-A-A--TC-TT--CG-G-C---AA-T-G-G--GG--GC-A-A--C-C--C-T-GA-C-C-G-A--GC-A--------A--C-GCC-G-C-G-T---------G-A-G--T--GA-A-G--A-A-G-G-TT----TT-CG-----------G-A-T--------C-G-T--A---AA-G-C-TC------------------------------TG-TT-G-T--A-AGT----C--A-A--G---AA-CGAG-T---G-T-G--A-G--A----------G--T---------------------GG---------------------------------A---A----A-------GT-…	SttSa536	SttSa535	Streptococcus salivarius
>000004800|size:3770	0.0503127	94.1%:StaEp124;94.1%:StaEp123		CC-T-AC-G-G-G-A-G-GC--A-GCA-G-T-A-G-G-G-A-A--TC-TT--CC-G-C---AA-T-G-G--GC--GA-A-A--G-C--C-T-GA-C-G-G-A--GC-A--------A--C-GCC-G-C-G-T---------G-A-G--T--GA-T-G--A-A-G-G-TC----TT-CG-----------G-A-T--------C-G-T--A---AA-A-C-TC------------------------------TG-TT-A-T--T-AGG----G--A-A--G---AA-CAAA-T---G-T-G--T-A--A----------G--T---------------------AA---------------------------------C--------T-------AT-…	StaEp124	StaEp123	Staphylococcus epidermidis
>000013597|size:5364	0.0494787	96.7%:KleP1002;96.7%:KlePn925		CC-T-AC-G-G-G-A-G-GC--A-GCA-G-T-G-G-G-G-A-A--TA-TT--GC-A-C---AA-T-G-G--GC--GC-A-A--G-C--C-T-GA-T-G-C-A--GC-C--------A--T-GCC-G-C-G-T---------G-T-G--T--GA-A-G--A-A-G-G-CC----TT-CG-----------G-G-T--------T-G-T--A---AA-G-C-AC------------------------------TT-TC-A-G--C-GGG----G--A-G--G---AA--GGC-G---A-T-A--A-G--G----------T--T---------------------AA---------------------------------T---A----A-------CC-…	KleP1002	KlePn925	Klebsiella pneumoniae
>000007904|size:4565	0.0494783	97.7%:FinMag11;97.7%:FinMag10		CC-T-AC-G-G-G-A-G-GC--A-GCA-G-T-G-G-G-G-A-A--TA-TT--GC-A-C---AA-T-G-G--GG--GA-A-A--C-C--C-T-GA-T-G-C-A--GC-G--------A--C-GCC-G-C-G-T---------G-A-A--C--GA-A-G--A-A-G-G-TA----TT-CG-----------T-A-T--------C-G-T--A---AA-G-T-TC------------------------------TG-TC-C-T--A-TGG----G--A-A--G---A-------------------------------------T---------------------AA-----------------------------------------------------…	FinMag11	FinMag10	Finegoldia magna
>000013422|size:1448	0.0493867	97.6%:EnrCl498;97.6%:EnrCl489		CC-T-AC-G-G-G-A-G-GC--A-GCA-G-T-G-G-G-G-A-A--TA-TT--GC-A-C---AA-T-G-G--GC--GC-A-A--G-C--C-T-GA-T-G-C-A--GC-C--------A--T-GCC-G-C-G-T---------G-T-A--T--GA-A-G--A-A-G-G-CC----TT-CG-----------G-G-T--------T-G-T--A---AA-G-T-AC------------------------------TT-TC-A-G--C-GGG----G--A-G--G---AA--GGC-G---A-C-A--G-G--G----------T--T---------------------AA---------------------------------T---A----A-------CC-…	EnrCl498	EnrCl489	Enterobacter cloacae
>000006039|size:3521	0.0491726	94.1%:KleOx153;94.1%:KleOx103		CC-T-AC-G-G-G-A-G-GC--A-GCA-G-T-G-G-G-G-A-A--TA-TT--GC-A-C---AA-T-G-G--GC--GC-A-A--G-C--C-T-GA-T-G-C-A--GC-C--------A--T-GCC-G-C-G-T---------G-T-A--T--GA-A-G--A-A-G-G-CC----TT-CG-----------G-G-T--------T-G-T--A---AA-G-T-AC------------------------------TT-TC-A-G--C-GGG----G--A-G--G---AA--GGG-A---G-T-A--A-G--G----------T--T---------------------AA---------------------------------T---A----A-------CC-…	KleOx153	KleOx103	Klebsiella oxytoca
>000002844|size:3354	0.0491187	96.6%:AcyNeui5;96.6%:AcyNeui3		CC-T-AC-G-G-G-A-G-GC--A-GCA-G-T-G-G-G-G-G-A--TA-TT--GC-A-C---AA-T-G-G--AC--GC-A-A--G-T--C-T-GA-T-G-C-A--GC-G--------A--C-GTC-G-T-G-T---------G-G-G--G--GA-T-G--A-A-G-G-CC----TT-CG-----------G-G-T--------T-G-T--A---AA-C-T-CC------------------------------TT-TC-G-C--C-TGC----G--G-A--A---AA-GGCA-G---G-G-T---------------------T---------------------TT---------------------------------G-------------------…	AcyNeui5	AcyNeui3	Acinetobacter ursingii
>000004970|size:2658	0.0480505	97.8%:StaEpi99;97.8%:StaEpi80		CC-T-AC-G-G-G-A-G-GC--A-GCA-G-T-A-G-G-G-A-A--TC-TT--CC-G-C---AA-T-G-G--GC--GA-A-A--G-C--T-T-GA-C-G-G-A--GC-A--------A--C-GCC-G-C-G-T---------G-A-G--T--GA-T-G--A-A-G-G-TC----TT-CG-----------G-A-T--------C-G-T--A---AA-A-C-TC------------------------------TG-TT-A-T--T-AGG----G--A-A--G---AA-CAAA-T---G-T-G--T-A--A----------G--T---------------------AA---------------------------------C--------T-------AT-…	StaEpi99	StaEpi80	Staphylococcus epidermidis
>000007484|size:3953	0.0480494	96.7%:KlePn623;94.1%:KlePn770		CC-T-AC-G-G-G-A-G-GC--A-GCA-G-T-G-G-G-G-A-A--TA-TT--GC-A-C---AA-T-G-G--GC--GC-A-A--G-C--C-T-GA-T-G-C-A--GC-C--------A--T-GCC-G-C-G-T---------G-T-G--T--GA-A-G--A-A-G-G-CC----TT-CG-----------G-G-T--------T-G-T--A---AA-G-C-AC------------------------------TT-TC-A-G--C-GGG----G--A-G--G---AA--GGC-G---C-C-A--A-G--G----------T--T---------------------AA---------------------------------T---A----A-------CC-…	KlePn623	KlePn770	Klebsiella pneumoniae
>000000712|size:4389	0.0478949	96.7%:ShiFle90;96.7%:ShiFle86		CC-T-AC-G-G-G-A-G-GC--A-GCA-G-T-G-G-G-G-A-A--TA-TT--GC-A-C---AA-T-G-G--GC--GC-A-A--G-C--C-T-GA-T-G-C-A--GC-C--------A--T-GCC-G-C-G-T---------G-T-A--T--GA-A-G--A-A-G-G-CC----TT-CG-----------G-G-T--------T-G-T--A---AA-G-T-AC------------------------------TT-TC-A-G--C-GGG----G--A-G--G---AA--GGG-A---G-T-A--A-A--G----------T--T---------------------AA---------------------------------T---A----C-------CT-…	ShiFle90	ShiFle86	Escherichia/Shigella
>000005820|size:3975	0.0477705	94.1%:KleOx153;94.1%:KleOx103		CC-T-AC-G-G-G-A-G-GC--A-GCA-G-T-G-G-G-G-A-A--TA-TT--GC-A-C---AA-T-G-G--GC--GC-A-A--G-C--C-T-GA-T-G-C-A--GC-C--------A--T-GCC-G-C-G-T---------G-T-A--T--GA-A-G--A-A-G-G-CC----TT-CG-----------G-G-T--------T-G-T--A---AA-G-T-AC------------------------------TT-TC-A-G--C-GGG----G--A-G--G---AA--GGG-A---G-T-A--A-G--G----------T--T---------------------AA---------------------------------T---A----A-------CC-…	KleOx153	KleOx103	Klebsiella oxytoca
>000011912|size:1873	0.0477502	96.7%:VeiTobe3;96.7%:VeiTobe2		CC-T-AC-G-G-G-A-G-GC--A-GCA-G-T-G-G-G-G-A-A--TC-TT--CC-G-C---AA-T-G-G--AC--GA-A-A--G-T--C-T-GA-C-G-G-A--GC-A--------A--C-GCC-G-C-G-T---------G-A-G--T--GA-T-G--A-C-G-G-CC----TT-CG-----------G-G-T--------T-G-T--A---AA-G-C-TC------------------------------TG-TT-A-A--T-CGG----G--A-C--G---AA-AGGC-C---T-T-C--T-T--G----------C--G---------------------AA---------------------------------T---A----G-------TT-…	VeiTobe3	VeiTobe2	Veillonella parvula
>000003516|size:4004	0.0477162	94.1%:VeiTobe3;94.1%:VeiTobe2	Veillonella parvula	CC-T-AC-G-G-G-A-G-GC--A-GCA-G-T-G-G-G-G-A-A--TC-TT--CC-G-C---AA-T-G-G--AC--GA-A-A--G-T--C-T-GA-C-G-G-A--GC-A--------A--C-GCC-G-C-G-T---------G-A-G--T--GA-T-G--A-C-G-G-CC----TT-CG-----------G-G-T--------T-G-T--A---AA-G-C-TC------------------------------TG-TT-A-A--T-CGG----G--A-C--G---AA-AGGC-C---T-T-C--T-T--G----------C--G---------------------AA---------------------------------T---A----G-------TG-…	VeiTobe3	VeiTobe2	Veillonella parvula
>000005816|size:2652	0.0468517	95.2%:ShiSon39;95.2%:Esch1638		CC-T-AC-G-G-G-A-G-GC--A-GCA-G-T-G-G-G-G-A-A--TA-TT--GC-A-C---AA-T-G-G--GC--GC-A-A--G-C--C-T-GA-T-G-C-A--GC-C--------A--T-GCC-G-C-G-T---------G-T-A--T--GA-A-G--A-A-G-G-CC----TT-CG-----------G-G-T--------T-G-T--A---AA-G-T-AC------------------------------TT-TC-A-G--C-GGG----G--A-G--G---AA--GGG-A---G-T-A--A-A--G----------T--T---------------------AA---------------------------------T---A----C-------CT-…	ShiSon39	Esch1638	Escherichia/Shigella
>000011475|size:2979	0.0464394	97.8%:CtbBra14;97.8%:CtbBra12	Citrobacter braakii	CC-T-AC-G-G-G-A-G-GC--A-GCA-G-T-G-G-G-G-A-A--TA-TT--GC-A-C---AA-T-G-G--GC--GC-A-A--G-C--C-T-GA-T-G-C-A--GC-C--------A--T-GCC-G-C-G-T---------G-T-A--T--GA-A-G--A-A-G-G-CC----TT-CG-----------G-G-T--------T-G-T--A---AA-G-T-AC------------------------------TT-TC-A-G--C-GAG----G--A-G--G---AA--GGC-A---T-T-G--T-G--G----------T--T---------------------AA---------------------------------T---A----A-------CC-…	CtbBra14	CtbBra12	Citrobacter braakii
>000008253|size:2460	0.0464114	97.7%:AauSpec5;97.7%:AauSpeci		CC-T-AC-G-G-G-A-G-GC--A-GCA-G-T-G-G-G-G-A-A--TT-TT--GC-A-C---AA-T-G-G--GG--GA-A-A--C-C--C-T-GA-T-G-C-A--GC-G--------A--C-GCC-G-C-G-T---------G-A-T--T--TA---G--A-A-G-G-CC----TT-CG-----------G-G-T--------T-G-T--A---AA-A-A-TC------------------------------TT-TT-G-T--A-TAG----G--A-A--G---A-------------------------------------A---------------------AA-----------------------------------------------------…	AauSpec5	AauSpeci	Anaerococcus provencensis
>000011157|size:5592	0.0460022	97.8%:StaAu565;97.8%:StaAu563		CC-T-AC-G-G-G-A-G-GC--A-GCA-G-T-A-G-G-G-A-A--TC-TT--CC-G-C---AA-T-G-G--GC--GA-A-A--G-C--C-T-GA-C-G-G-A--GC-A--------A--C-GCC-G-C-G-T---------G-A-G--T--GA-T-G--A-A-G-G-TC----TT-CG-----------G-A-T--------C-G-T--A---AA-A-C-TC------------------------------TG-TT-A-T--T-AGG----G--A-A--G---AA-CATA-T---G-T-G--T-A--A----------G--T---------------------AA---------------------------------C--------T-------GT-…	StaAu565	StaAu563	Staphylococcus aureus
>000006292|size:293	0.0459003	96.6%:BifLon65;96.6%:BifLon64		CC-T-AC-G-G-G-A-G-GC--A-GCA-G-T-G-G-G-G-A-A--TA-TT--GC-A-C---AA-T-G-G--GC--GC-A-A--G-C--C-T-GA-T-G-C-A--GC-G--------A--C-GCC-G-C-G-T---------G-A-G--G--GA-T-G--G-A-G-G-CC----TT-CG-----------G-G-T--------T-G-T--A---AA-C-C-TC------------------------------TT-TT-A-T--C-GGG----G--A-G--C---AA--G-C-------------------------------G---------------------TG---------------------------------A-------------------…	BifLon65	BifLon64	Bifidobacterium longum subsp. Infantis
>000004829|size:3589	0.0457585	97.8%:StaEpi99;97.8%:StaEpi80		CC-T-AC-G-G-G-A-G-GC--A-GCA-G-T-A-G-G-G-A-A--TC-TT--CC-G-C---AA-T-G-G--GC--GA-A-A--G-C--T-T-GA-C-G-G-A--GC-A--------A--C-GCC-G-C-G-T---------G-A-G--T--GA-T-G--A-A-G-G-TC----TT-CG-----------G-A-T--------C-G-T--A---AA-A-C-TC------------------------------TG-TT-A-T--T-AGG----G--A-A--G---AA-CAAA-T---G-T-G--T-A--A----------G--T---------------------AA---------------------------------C--------T-------AT-…	StaEpi99	StaEpi80	Staphylococcus epidermidis
>000013048|size:3210	0.0452599	96.9%:KleOxy31;96.7%:KleOx242		CC-T-AC-G-G-G-A-G-GC--A-GCA-G-T-G-G-G-G-A-A--TA-TT--GC-A-C---AA-T-G-G--GC--GC-A-A--G-C--C-T-GA-T-G-C-A--GC-C--------A--T-GCC-G-C-G-T---------G-T-A--T--GA-A-G--A-A-G-G-CC----TT-CG-----------G-G-T--------T-G-T--A---AA-G-T-AC------------------------------TT-TC-A-G--C-GGG----G--A-G--G---AA--GGC-G---A-T-A--A-G--G----------T--T---------------------AA---------------------------------T---A----A-------CC-…	KleOxy31	KleOx242	Klebsiella oxytoca
>000006378|size:2659	0.0447343	97.4%:KleOxy31;97.1%:KleOx242		CC-T-AC-G-G-G-A-G-GC--A-GCA-G-T-G-G-G-G-A-A--TA-TT--GC-A-C---AA-T-G-G--GC--GC-A-A--G-C--C-T-GA-T-G-C-A--GC-C--------A--T-GCC-G-C-G-T---------G-T-A--T--GA-A-G--A-A-G-G-CC----TT-CG-----------G-G-T--------T-G-T--A---AA-G-T-AC------------------------------TT-TC-A-G--C-GGG----G--A-G--G---AA--GGC-G---A-T-A--A-G--G----------T--T---------------------AA---------------------------------T---A----A-------CC-…	KleOxy31	KleOx242	Klebsiella oxytoca
>000004801|size:2218	0.0445579	94.1%:StaEp124;94.1%:StaEp123		CC-T-AC-G-G-G-A-G-GC--A-GCA-G-T-A-G-G-G-A-A--TC-TT--CC-G-C---AA-T-G-G--GC--GA-A-A--G-C--C-T-GA-C-G-G-A--GC-A--------A--C-GCC-G-C-G-T---------G-A-G--T--GA-T-G--A-A-G-G-TC----TT-CG-----------G-A-T--------C-G-T--A---AA-A-C-TC------------------------------TG-TT-A-T--T-AGG----G--A-A--G---AA-CAAA-T---G-T-G--T-A--A----------G--T---------------------AA---------------------------------C--------T-------AT-…	StaEp124	StaEp123	Staphylococcus epidermidis
>000005228|size:3300	0.0445258	96.7%:StaEpi99;96.7%:StaEpi80		CC-T-AC-G-G-G-A-G-GC--A-GCA-G-T-A-G-G-G-A-A--TC-TT--CC-G-C---AA-T-G-G--GC--GA-A-A--G-C--T-T-GA-C-G-G-A--GC-A--------A--C-GCC-G-C-G-T---------G-A-G--T--GA-T-G--A-A-G-G-TC----TT-CG-----------G-A-T--------C-G-T--A---AA-A-C-TC------------------------------TG-TT-A-T--T-AGG----G--A-A--G---AA-CAAA-T---G-T-G--T-A--A----------G--T---------------------AA---------------------------------C--------T-------AT-…	StaEpi99	StaEpi80	Staphylococcus epidermidis
>000008883|size:3205	0.0443959	90.0%:AauHydr3;90.0%:AauHydr2	Anaerococcus hydrogenalis	CC-T-AC-G-G-G-A-G-GC--A-GCA-G-T-G-G-G-G-A-A--TT-TT--GC-A-C---AA-T-G-G--GG--GA-A-A--C-C--C-T-GA-T-G-C-A--GC-G--------A--C-GCC-G-C-G-T---------G-A-T--T--TA---G--A-A-G-G-CC----TT-CG-----------G-G-T--------T-G-T--A---AA-A-A-TC------------------------------TT-TT-T-T--A-CGG----G--A-T--G---A-------------------------------------A---------------------AA-----------------------------------------------------…	AauHydr3	AauHydr2	Anaerococcus hydrogenalis
>000002698|size:509	0.0443651	96.7%:KleOx234;96.7%:KleOx231		CC-T-AC-G-G-G-A-G-GC--A-GCA-G-T-G-G-G-G-A-A--TA-TT--GC-A-C---AA-T-G-G--GC--GC-A-A--G-C--C-T-GA-T-G-C-A--GC-C--------A--T-GCC-G-C-G-T---------G-T-A--T--GA-A-G--A-A-G-G-CC----TT-CG-----------G-G-T--------T-G-T--A---AA-G-T-AC------------------------------TT-TC-A-G--C-GGG----G--A-G--G---AA--GGT-G---T-T-G--A-G--G----------T--T---------------------AA---------------------------------T---A----A-------CC-…	KleOx234	KleOx231	Klebsiella oxytoca
>000003557|size:1951	0.0443411	96.6%:BifDen14;96.6%:BifDent2		CC-T-AC-G-G-G-A-G-GC--A-GCA-G-T-G-G-G-G-A-A--TA-TT--GC-A-C---AA-T-G-G--GC--GC-A-A--G-C--C-T-GA-T-G-C-A--GC-G--------A--C-GCC-G-C-G-T---------G-C-G--G--GA-T-G--G-A-G-G-CC----TT-CG-----------G-G-T--------T-G-T--A---AA-C-C-GC------------------------------TT-TT-G-A--T-CGG----G--A-G--C---AA--GCC-C-----------------------------T---------------------TC---------------------------------G-------------------…	BifDen14	BifDent2	Bifidobacterium dentium
>000008165|size:1880	0.0436387	97.7%:ClsPer86;97.7%:ClsPer59	Clostridium perfringens	CC-T-AC-G-G-G-A-G-GC--A-GCA-G-T-G-G-G-G-A-A--TA-TT--GC-A-C---AA-T-G-G--GG--GA-A-A--C-C--C-T-GA-T-G-C-A--GC-A--------A--C-GCC-G-C-G-T---------G-A-G--T--GA-T-G--A-A-G-G-TT----TT-CG-----------G-A-T--------C-G-T--A---AA-G-C-TC------------------------------TG-TC-T-T--T-GGG----G--A-A--G---A-------------------------------------T---------------------AA-----------------------------------------------------…	ClsPer86	ClsPer59	Clostridium perfringens
>000002547|size:4050	0.0430446	97.8%:StaAu564;97.8%:EntFa534	Enterococcus faecalis	C--T-AC-G-G-G-A-G-GC--A-GCA-G-T-A-G-G-G-A-A--TC-TT--CG-G-C---AA-T-G-G--AC--GA-A-A--G-T--C-T-GA-C-C-G-A--GC-A--------A--C-GCC-G-C-G-T---------G-A-G--T--GA-A-G--A-A-G-G-TT----TT-CG-----------G-A-T--------C-G-T--A---AA-A-C-TC------------------------------TG-TT-G-T--T-AGA----G--A-A--G---AA-CAAG-G---A-C-G--T-T--A----------G--T---------------------AA---------------------------------C--------T-------GA-…	StaAu564	EntFa534	Enterococcus faecalis
>000012977|size:14305	0.0429869	98.0%:EnrCl431;98.0%:EnrCl257	Enterobacter cloacae	CC-T-AC-G-G-G-A-G-GC--A-GCA-G-T-G-G-G-G-A-A--TA-TT--GC-A-C---AA-T-G-G--GC--GC-A-A--G-C--C-T-GA-T-G-C-A--GC-C--------A--T-GCC-G-C-G-T---------G-T-A--T--GA-A-G--A-A-G-G-CC----TT-CG-----------G-G-T--------T-G-T--A---AA-G-T-AC------------------------------TT-TC-A-G--C-GGG----G--A-G--G---AA--GGC-G---A-T-A--A-G--G----------T--T---------------------AA---------------------------------T---A----A-------CC-…	EnrCl431	EnrCl257	Enterobacter cloacae
>000002540|size:1070	0.0426361	96.9%:StaAu564;96.9%:EntFa534		CC-T-AC-G-G-G-A-G-GC--A-GCA-G-T-A-G-G-G-A-A--TC-TT--CG-G-C---AA-T-G-G--AC--GA-A-A--G-T--C-T-GA-C-C-G-A--GC-A--------A--C-GCC-G-C-G-T---------G-A-G--T--GA-A-G--A-A-G-G-TT----TT-CG-----------G-A-T--------C-G-T--A---AA-A-C-TC------------------------------TG-TT-G-T--T-AGA----G--A-A--G---AA-CAAG-G---A-C-G--T-T--A----------G--T---------------------AA---------------------------------C--------T-------GA-…	StaAu564	EntFa534	Enterococcus faecalis
>000002677|size:11776	0.0425419	96.7%:EnrCl529;96.7%:EnrCl528	Enterobacter cloacae	CC-T-AC-G-G-G-A-G-GC--A-GCA-G-T-G-G-G-G-A-A--TA-TT--GC-A-C---AA-T-G-G--GC--GC-A-A--G-C--C-T-GA-T-G-C-A--GC-C--------A--T-GCC-G-C-G-T---------G-T-A--T--GA-A-G--A-A-G-G-CC----TT-CG-----------G-G-T--------T-G-T--A---AA-G-T-AC------------------------------TT-TC-A-G--C-GGG----G--A-G--G---AA--GGT-G---T-T-G--A-G--G----------T--T---------------------AA---------------------------------T---A----A-------CC-…	EnrCl529	EnrCl528	Enterobacter cloacae
>000009230|size:1838	0.0420521	91.1%:PbdDis25;91.1%:PbdDis21	Parabacteroides distasonis	CC-T-AC-G-G-G-A-G-GC--A-GCA-G-T-G-A-G-G-A-A--TA-TT--GG-T-C---AA-T-G-G--GC--GC-G-A--G-C--C-T-GA-A-C-C-A--GC-C--------A--A-GTC-G-C-G-T---------G-A-G--G--GA-T-G--A-A-G-G-TT-C--TA-TG-----------G-A-T--------C-G-T--A---AA-C-C-TC------------------------------TT-TT-A-T--A-AGG----G--A-A--T---AA-AGTG-C---G-G-G--A------------------C---------------------GT---------------------------------G-------------------…	PbdDis25	PbdDis21	Parabacteroides distasonis
>000006554|size:3795	0.0420131	98.0%:KleVar40;98.0%:KlePn961		CC-T-AC-G-G-G-A-G-GC--A-GCA-G-T-G-G-G-G-A-A--TA-TT--GC-A-C---AA-T-G-G--GC--GC-A-A--G-C--C-T-GA-T-G-C-A--GC-C--------A--T-GCC-G-C-G-T---------G-T-G--T--GA-A-G--A-A-G-G-CC----TT-CG-----------G-G-T--------T-G-T--A---AA-G-C-AC------------------------------TT-TC-A-G--C-GGG----G--A-G--G---AA--GGC-G---G-T-G--A-G--G----------T--T---------------------AA---------------------------------T---A----A-------CC-…	KleVar40	KlePn961	Klebsiella pneumoniae
>000000479|size:2727	0.0420012	95.2%:StaEp124;95.2%:StaEp123		CC-T-AC-G-G-G-A-G-GC--A-GCA-G-T-A-G-G-G-A-A--TC-TT--CC-G-C---AA-T-G-G--GC--GA-A-A--G-C--C-T-GA-C-G-G-A--GC-A--------A--C-GCC-G-C-G-T---------G-A-G--T--GA-T-G--A-A-G-G-TC----TT-CG-----------G-A-T--------C-G-T--A---AA-A-C-TC------------------------------TG-TT-A-T--T-AGG----G--A-A--G---AA-TAAA-T---G-T-G--T-A--A----------G--T---------------------AA---------------------------------C--------T-------AT-…	StaEp124	StaEp123	Staphylococcus epidermidis
>000007461|size:1378	0.0418733	97.8%:KleVar40;97.8%:KlePn961		CC-T-AC-G-G-G-A-G-GC--A-GCA-G-T-G-G-G-G-A-A--TA-TT--GC-A-C---AA-T-G-G--GC--GC-A-A--G-C--C-T-GA-T-G-C-A--GC-C--------A--T-GCC-G-C-G-T---------G-T-G--T--GA-A-G--A-A-G-G-CC----TT-CG-----------G-G-T--------T-G-T--A---AA-G-C-AC------------------------------TT-TC-A-G--C-GGG----G--A-G--G---AA--GGC-G---G-T-G--A-G--G----------T--T---------------------AA---------------------------------T---A----A-------CC-…	KleVar40	KlePn961	Klebsiella pneumoniae
>000002678|size:1927	0.0416698	97.8%:KleOx234;97.8%:KleOx231		CC-T-AC-G-G-G-A-G-GC--A-GCA-G-T-G-G-G-G-A-A--TA-TT--GC-A-C---AA-T-G-G--GC--GC-A-A--G-C--C-T-GA-T-G-C-A--GC-C--------A--T-GCC-G-C-G-T---------G-T-A--T--GA-A-G--A-A-G-G-CC----TT-CG-----------G-G-T--------T-G-T--A---AA-G-T-AC------------------------------TT-TC-A-G--C-GGG----G--A-G--G---AA--GGT-G---T-T-G--A-G--G----------T--T---------------------AA---------------------------------T---A----A-------CC-…	KleOx234	KleOx231	Klebsiella oxytoca
>000013673|size:2937	0.0415506	97.8%:KleP1002;97.8%:KlePn925		CC-T-AC-G-G-G-A-G-GC--A-GCA-G-T-G-G-G-G-A-A--TA-TT--GC-A-C---AA-T-G-G--GC--GC-A-A--G-C--C-T-GA-T-G-C-A--GC-C--------A--T-GCC-G-C-G-T---------G-T-G--T--GA-A-G--A-A-G-G-CC----TT-CG-----------G-G-T--------T-G-T--A---AA-G-C-AC------------------------------TT-TC-A-G--C-GGG----G--A-G--G---AA--GGC-G---A-T-A--A-G--G----------T--T---------------------AA---------------------------------T---A----A-------CC-…	KleP1002	KlePn925	Klebsiella pneumoniae
>000002673|size:1014	0.0414193	96.7%:KleOx234;96.7%:KleOx231		CC-T-AC-G-G-G-A-G-GC--A-GCA-G-T-G-G-G-G-A-A--TA-TT--GC-A-C---AA-T-G-G--GC--GC-A-A--G-C--C-T-GA-T-G-C-A--GC-C--------A--T-GCC-G-C-G-T---------G-T-A--T--GA-A-G--A-A-G-G-CC----TT-CG-----------G-G-T--------T-G-T--A---AA-G-T-AC------------------------------TT-TC-A-G--C-GGG----G--A-G--G---AA--GGT-G---T-T-G--A-G--G----------T--T---------------------AA---------------------------------T---A----A-------CC-…	KleOx234	KleOx231	Klebsiella oxytoca
>000000716|size:3062	0.0408649	96.7%:PntCali2;96.7%:PntCalid		CC-T-AC-G-G-G-A-G-GC--A-GCA-G-T-G-G-G-G-A-A--TA-TT--GC-A-C---AA-T-G-G--GC--GC-A-A--G-C--C-T-GA-T-G-C-A--GC-C--------A--T-GCC-G-C-G-T---------G-T-A--T--GA-A-G--A-A-G-G-CC----TT-CG-----------G-G-T--------T-G-T--A---AA-G-T-AC------------------------------TT-TC-A-G--C-GGG----G--A-G--G---AA--GGG-A---T-G-G--T-G--C----------T--T---------------------AA---------------------------------T---A----C-------GC-…	PntCali2	PntCalid	Pantoea calida
>000006329|size:2756	0.0406835	95.2%:EnrCl527;95.2%:EnrCl526		CC-T-AC-G-G-G-A-G-GC--A-GCA-G-T-G-G-G-G-A-A--TA-TT--GC-A-C---AA-T-G-G--GC--GC-A-A--G-C--C-T-GA-T-G-C-A--GC-C--------A--T-GCC-G-C-G-T---------G-T-A--T--GA-A-G--A-A-G-G-CC----TT-CG-----------G-G-T--------T-G-T--A---AA-G-T-AC------------------------------TT-TC-A-G--C-GGG----G--A-G--G---AA--GGC-G---A-T-A--A-A--G----------T--T---------------------AA---------------------------------T---A----A-------CC-…	EnrCl527	EnrCl526	Enterobacter cloacae
>000014570|size:2772	0.0404954	97.8%:ShiSon39;97.8%:Esch1638		CC-T-AC-G-G-G-A-G-GC--A-GCA-G-T-G-G-G-G-A-A--TA-TT--GC-A-C---AA-T-G-G--GC--GC-A-A--G-C--C-T-GA-T-G-C-A--GC-C--------A--T-GCC-G-C-G-T---------G-T-A--T--GA-A-G--A-A-G-G-CC----TT-CG-----------G-G-T--------T-G-T--A---AA-G-T-AC------------------------------TT-TC-A-G--C-GGG----G--A-G--G---AA--GGG-A---G-T-A--A-A--G----------T--T---------------------AA---------------------------------T---A----C-------CT-…	ShiSon39	Esch1638	Escherichia/Shigella
>000011983|size:2274	0.0403373	96.7%:AciPit27;96.7%:AciPit26		CC-T-AC-G-G-G-A-G-GC--A-GCA-G-T-G-G-G-G-A-A--TA-TT--GG-A-C---AA-T-G-G--GC--GC-A-A--G-C--C-T-GA-T-C-C-A--GC-C--------A--T-GCC-G-C-G-T---------G-T-G--T--GA-A-G--A-A-G-G-CC----TT-AT-----------G-G-T--------T-G-T--A---AA-G-C-AC------------------------------TT-TA-A-G--C-GAG----G--A-G--G---AG--GCT-A---C-T-T--T-A--G----------T--T---------------------AA---------------------------------T---A----C-------CT-…	AciPit27	AciPit26	Acinetobacter pittii
>000002683|size:1950	0.0401127	97.8%:EnrCl529;97.8%:EnrCl528		CC-T-AC-G-G-G-A-G-GC--A-GCA-G-T-G-G-G-G-A-A--TA-TT--GC-A-C---AA-T-G-G--GC--GC-A-A--G-C--C-T-GA-T-G-C-A--GC-C--------A--T-GCC-G-C-G-T---------G-T-A--T--GA-A-G--A-A-G-G-CC----TT-CG-----------G-G-T--------T-G-T--A---AA-G-T-AC------------------------------TT-TC-A-G--C-GGG----G--A-G--G---AA--GGT-G---T-T-G--A-G--G----------T--T---------------------AA---------------------------------T---A----A-------CC-…	EnrCl529	EnrCl528	Enterobacter cloacae
>000001190|size:3017	0.0399061	96.7%:KleP1014;96.7%:KleP1012		CC-T-AC-G-G-G-A-G-GC--A-GCA-G-T-G-G-G-G-A-A--TA-TT--GC-A-C---AA-T-G-G--GC--GC-A-A--G-C--C-T-GA-T-G-C-A--GC-C--------A--T-GCC-G-C-G-T---------G-T-G--T--GA-A-G--A-A-G-G-CC----TT-CG-----------G-G-T--------T-G-T--A---AA-G-C-AC------------------------------TT-TC-A-G--C-GGG----G--A-G--G---AA--GGC-G---T-T-A--A-G--G----------T--T---------------------AA---------------------------------T---A----A-------CC-…	KleP1014	KleP1012	Klebsiella pneumoniae
>000014783|size:2145	0.0396945	96.7%:KleP1010;96.7%:KleVar41		CC-T-AC-G-G-G-A-G-GC--A-GCA-G-T-G-G-G-G-A-A--TA-TT--GC-A-C---AA-T-G-G--GC--GC-A-A--G-C--C-T-GA-T-G-C-A--GC-C--------A--T-GCC-G-C-G-T---------G-T-G--T--GA-A-G--A-A-G-G-CC----TT-CG-----------G-G-T--------T-G-T--A---AA-G-C-AC------------------------------TT-TC-A-G--C-GGG----G--A-G--G---AA--GGC-G---A-T-A--A-G--G----------T--T---------------------AA---------------------------------T---A----A-------CC-…	KleP1010	KleVar41	Klebsiella pneumoniae
>000005804|size:2552	0.0395281	97.8%:KleOx209;97.8%:KleOx142		CC-T-AC-G-G-G-A-G-GC--A-GCA-G-T-G-G-G-G-A-A--TA-TT--GC-A-C---AA-T-G-G--GC--GC-A-A--G-C--C-T-GA-T-G-C-A--GC-C--------A--T-GCC-G-C-G-T---------G-T-A--T--GA-A-G--A-A-G-G-CC----TT-CG-----------G-G-T--------T-G-T--A---AA-G-T-AC------------------------------TT-TC-A-G--C-GGG----G--A-G--G---AA--GGG-A---G-T-A--A-G--G----------T--T---------------------AA---------------------------------T---A----A-------CC-…	KleOx209	KleOx142	Klebsiella oxytoca
>000004144|size:3195	0.0389112	96.7%:PbdJohn3;96.7%:PbdJohn2		CC-T-AC-G-G-G-A-G-GC--A-GCA-G-T-G-A-G-G-A-A--TA-TT--GG-T-C---AA-T-G-G--CC--GA-G-A--G-G--C-T-GA-A-C-C-A--GC-C--------A--A-GTC-G-C-G-T---------G-A-A--G--GA-T-G--A-A-G-G-AT-C--TA-TG-----------G-T-T--------T-G-T--A---AA-C-T-TC------------------------------TT-TT-A-T--A-GGG----G--A-A--T---AA-AGTG-T---G-G-G--A------------------C---------------------GT---------------------------------G-------------------…	PbdJohn3	PbdJohn2	Parabacteroides distasonis
>000013772|size:1828	0.0389006	96.5%:PpuAsac4;96.5%:PpuGross		CC-T-AC-G-G-G-A-G-GC--A-GCA-G-T-G-G-G-G-A-A--TA-TT--GC-A-C---AA-T-G-G--AG--GG-A-A--C-T--C-T-GA-T-G-C-A--GC-G--------A--C-GCC-G-C-G-T---------G-A-A--C--GA-A-G--A-A-G-G-CT----TT-CG-----------A-G-T--------C-G-T--A---AA-G-T-TC------------------------------TT-TT-A-T--A-TGG----G--A-A--G---A-------------------------------------T---------------------AA-----------------------------------------------------…	PpuAsac4	PpuGross	Peptoniphilus asaccharolyticus
>000008531|size:768	0.0387393	96.5%:SpnEchi8;96.5%:SpnAlpin		CC-T-AC-G-G-G-A-G-GC--A-GCA-G-T-G-G-G-G-A-A--TA-TT--GG-A-C---AA-T-G-G--GC--GA-A-A--G-C--C-T-GA-T-C-C-A--GC-A--------A--T-GCC-G-C-G-T---------G-A-G--T--GA-T-G--A-A-G-G-CC----TT-AG-----------G-G-T--------T-G-T--A---AA-G-C-TC------------------------------TT-TT-A-C--C-CGG----G--A-T--G---A-------------------------------------T---------------------AA-----------------------------------------------------…	SpnEchi8	SpnAlpin	Sphingomonas echinoides
>000002505|size:3455	0.0385234	98.0%:StaAu564;98.0%:EntFa534		C--T-AC-G-G-G-A-G-GC--A-GCA-G-T-A-G-G-G-A-A--TC-TT--CG-G-C---AA-T-G-G--AC--GA-A-A--G-T--C-T-GA-C-C-G-A--GC-A--------A--C-GCC-G-C-G-T---------G-A-G--T--GA-A-G--A-A-G-G-TT----TT-CG-----------G-A-T--------C-G-T--A---AA-A-C-TC------------------------------TG-TT-G-T--T-AGA----G--A-A--G---AA-CAAG-G---A-C-G--T-T--A----------G--T---------------------AA---------------------------------C--------T-------GA-…	StaAu564	EntFa534	Enterococcus faecalis
>000011861|size:2262	0.0385148	96.6%:BifBre27;96.6%:BifBre19	Bifidobacterium breve	CC-T-AC-G-G-G-A-G-GC--A-GCA-G-T-G-G-G-G-A-A--TA-TT--GC-A-C---AA-T-G-G--GC--GC-A-A--G-C--C-T-GA-T-G-C-A--GC-G--------A--C-GCC-G-C-G-T---------G-A-G--G--GA-T-G--G-A-G-G-CC----TT-CG-----------G-G-T--------T-G-T--A---AA-C-C-TC------------------------------TT-TT-G-T--T-AGG----G--A-G--C---AA-GG-C-A---T-------------------------T---------------------TT-----------------------------------------------------…	BifBre27	BifBre19	Bifidobacterium breve
>000007207|size:3203	0.0383018	96.7%:KleVar40;96.7%:KlePn961		CC-T-AC-G-G-G-A-G-GC--A-GCA-G-T-G-G-G-G-A-A--TA-TT--GC-A-C---AA-T-G-G--GC--GC-A-A--G-C--C-T-GA-T-G-C-A--GC-C--------A--T-GCC-G-C-G-T---------G-T-G--T--GA-A-G--A-A-G-G-CC----TT-CG-----------G-G-T--------T-G-T--A---AA-G-C-AC------------------------------TT-TC-A-G--C-GGG----G--A-G--G---AA--GGC-G---G-T-G--A-G--G----------T--T---------------------AA---------------------------------T---A----A-------CC-…	KleVar40	KlePn961	Klebsiella pneumoniae
>000013313|size:1866	0.0378921	98.0%:EnrCl527;98.0%:EnrCl526		CC-T-AC-G-G-G-A-G-GC--A-GCA-G-T-G-G-G-G-A-A--TA-TT--GC-A-C---AA-T-G-G--GC--GC-A-A--G-C--C-T-GA-T-G-C-A--GC-C--------A--T-GCC-G-C-G-T---------G-T-A--T--GA-A-G--A-A-G-G-CC----TT-CG-----------G-G-T--------T-G-T--A---AA-G-T-AC------------------------------TT-TC-A-G--C-GGG----G--A-G--G---AA--GGC-G---A-T-A--A-G--G----------T--T---------------------AA---------------------------------T---A----A-------CC-…	EnrCl527	EnrCl526	Enterobacter cloacae
>000004743|size:1879	0.0377542	97.8%:StaEp122;97.8%:StaCap17		CC-T-AC-G-G-G-A-G-GC--A-GCA-G-T-A-G-G-G-A-A--TC-TT--CC-G-C---AA-T-G-G--GC--GA-A-A--G-C--C-T-GA-C-G-G-A--GC-A--------A--C-GCC-G-C-G-T---------G-A-G--T--GA-A-G--A-A-G-G-TC----TT-CG-----------G-A-T--------C-G-T--A---AA-A-C-TC------------------------------TG-TT-A-T--T-AGG----G--A-A--G---AA-CAAA-T---G-T-G--T-A--A----------G--T---------------------AA---------------------------------C--------T-------AT-…	StaEp122	StaCap17	Staphylococcus epidermidis
>000011124|size:2302	0.0375512	97.8%:StaAu565;97.8%:StaAu563		CC-T-AC-G-G-G-A-G-GC--A-GCA-G-T-A-G-G-G-A-A--TC-TT--CC-G-C---AA-T-G-G--GC--GA-A-A--G-C--C-T-GA-C-G-G-A--GC-A--------A--C-GCC-G-C-G-T---------G-A-G--T--GA-T-G--A-A-G-G-TC----TT-CG-----------G-A-T--------C-G-T--A---AA-A-C-TC------------------------------TG-TT-A-T--T-AGG----G--A-A--G---AA-CATA-T---G-T-G--T-A--A----------G--T---------------------AA---------------------------------C--------T-------GT-…	StaAu565	StaAu563	Staphylococcus aureus
>000013484|size:3055	0.0375386	94.1%:EnrCl527;94.1%:EnrCl526		CC-T-AC-G-G-G-A-G-GC--A-GCA-G-T-G-G-G-G-A-A--TA-TT--GC-A-C---AA-T-G-G--GC--GC-A-A--G-C--C-T-GA-T-G-C-A--GC-C--------A--T-GCC-G-C-G-T---------G-T-A--T--GA-A-G--A-A-G-G-CC----TT-CG-----------G-G-T--------T-G-T--A---AA-G-T-AC------------------------------TT-TC-A-G--C-GGG----G--A-G--G---AA--GGC-G---A-T-A--A-A--G----------T--T---------------------AA---------------------------------T---A----A-------CC-…	EnrCl527	EnrCl526	Enterobacter cloacae
>000011180|size:2702	0.0374117	96.7%:StaAu565;96.7%:StaAu563		CC-T-AC-G-G-G-A-G-GC--A-GCA-G-T-A-G-G-G-A-A--TC-TT--CC-G-C---AA-T-G-G--GC--GA-A-A--G-C--C-T-GA-C-G-G-A--GC-A--------A--C-GCC-G-C-G-T---------G-A-G--T--GA-T-G--A-A-G-G-TC----TT-CG-----------G-A-T--------C-G-T--A---AA-A-C-TC------------------------------TG-TT-A-T--T-AGG----G--A-A--G---AA-CATA-T---G-T-G--T-A--A----------G--T---------------------AA---------------------------------C--------T-------GT-…	StaAu565	StaAu563	Staphylococcus aureus
>000013536|size:2683	0.0370422	97.8%:EnrCl431;97.8%:EnrCl257		CC-T-AC-G-G-G-A-G-GC--A-GCA-G-T-G-G-G-G-A-A--TA-TT--GC-A-C---AA-T-G-G--GC--GC-A-A--G-C--C-T-GA-T-G-C-A--GC-C--------A--T-GCC-G-C-G-T---------G-T-A--T--GA-A-G--A-A-G-G-CC----TT-CG-----------G-G-T--------T-G-T--A---AA-G-T-AC------------------------------TT-TC-A-G--C-GGG----G--A-G--G---AA--GGC-G---A-T-A--A-G--G----------T--T---------------------AA---------------------------------T---A----A-------CC-…	EnrCl431	EnrCl257	Enterobacter cloacae
>000005008|size:2916	0.0367	95.2%:StaEp122;95.2%:StaCap17		CC-T-AC-G-G-G-A-G-GC--A-GCA-G-T-A-G-G-G-A-A--TC-TT--CC-G-C---AA-T-G-G--GC--GA-A-A--G-C--C-T-GA-C-G-G-A--GC-A--------A--C-GCC-G-C-G-T---------G-A-G--T--GA-A-G--A-A-G-G-TC----TT-CG-----------G-A-T--------A-G-T--A---AA-A-C-TC------------------------------TG-TT-A-T--T-AGG----G--A-A--G---AA-CAAA-T---G-T-G--T-A--A----------G--T---------------------AA---------------------------------C--------T-------AT-…	StaEp122	StaCap17	Staphylococcus epidermidis
>000008382|size:158	0.0364311	96.5%:PpcDi105;96.5%:PpcDi102		CC-T-AT-G-G-G-A-G-GC--A-GCA-G-T-G-G-G-G-A-A--TA-TT--GC-A-C---AA-T-G-G--GC--GA-A-A--G-C--C-T-GA-T-G-C-A--GC-A--------A--C-GCC-G-C-G-T---------G-A-G--T--GA-T-G--A-A-G-G-CC----TT-CG-----------G-G-T--------C-G-T--A---AA-A-C-TC------------------------------TG-TC-C-T--C-AAG----G--A-A--G---A-------------------------------------T---------------------AA-----------------------------------------------------…	PpcDi105	PpcDi102	Clostridioides difficile
>000012618|size:2082	0.0360422	95.6%:ShiSon39;95.6%:Esch1638		CC-T-AA-G-G-G-A-G-GC--A-GCA-G-T-G-G-G-G-A-A--TA-TT--GC-A-C---AA-T-G-G--GC--GC-A-A--G-C--C-T-GA-T-G-C-A--GC-C--------A--T-GCC-G-C-G-T---------G-T-A--T--GA-A-G--A-A-G-G-CC----TT-CG-----------G-G-T--------T-G-T--A---AA-G-T-AC------------------------------TT-TC-A-G--C-GGG----G--A-G--G---AA--GGG-A---G-T-A--A-A--G----------T--T---------------------AA---------------------------------T---A----C-------CT-…	ShiSon39	Esch1638	Escherichia/Shigella
>000011728|size:2429	0.0357725	96.7%:AcyUrog4;96.7%:AcyUrog3		CC-T-AC-G-G-G-A-G-GC--A-GCA-G-T-G-G-G-G-A-A--TA-TT--GC-A-C---AA-T-G-G--GC--GC-A-A--G-C--C-T-GA-T-G-C-A--GC-G--------A--C-GCC-G-C-G-T---------G-A-G--G--GA-T-G--G-A-G-G-CC----TT-CG-----------G-G-T--------T-G-T--A---AA-C-C-TC------------------------------TT-TC-G-C--C-AGT----G--A-A--G---CA-GGCC-A---T-C-T--T------------------C---------------------TTT--------------------------------G---T---------------…	AcyUrog4	AcyUrog3	Actinomyces urogenitalis
>000013406|size:1705	0.0354501	95.2%:EnrCl498;95.2%:EnrCl489		CC-T-AC-G-G-G-A-G-GC--A-GCA-G-T-G-G-G-G-A-A--TA-TT--GC-A-C---AA-T-G-G--GC--GC-A-A--G-C--C-T-GA-T-G-C-A--GC-C--------A--T-GCC-G-C-G-T---------G-T-A--T--GA-A-G--A-A-G-G-CC----TT-CG-----------G-G-T--------T-G-T--A---AA-G-T-AC------------------------------TT-TC-A-G--C-GGG----G--A-G--G---AA--GGC-G---A-C-A--G-G--G----------T--T---------------------AA---------------------------------T---A----A-------CC-…	EnrCl498	EnrCl489	Enterobacter cloacae
>000001800|size:3065	0.0351126	94.0%:PpcDi104;94.0%:PbdDis16		CC-T-AC-G-G-G-A-G-GC--A-GCA-G-T-G-A-G-G-A-A--TA-TT--GG-T-C---AA-T-G-G--CC--GA-G-A--G-G--C-T-GA-A-C-C-A--GC-C--------A--A-GTC-G-C-G-T---------G-A-G--G--GA-T-G--A-A-G-G-TT-C--TA-TG-----------G-A-T--------C-G-T--A---AA-C-C-TC------------------------------TT-TT-A-T--A-AGG----G--A-A--T---AA-AGTG-C---G-G-G--A------------------C---------------------GT---------------------------------G-------------------…	PpcDi104	PbdDis16	Parabacteroides distasonis
>000011059|size:2546	0.0350072	96.7%:StaAu565;96.7%:StaAu563		CC-T-AC-G-G-G-A-G-GC--A-GCA-G-T-A-G-G-G-A-A--TC-TT--CC-G-C---AA-T-G-G--GC--GA-A-A--G-C--C-T-GA-C-G-G-A--GC-A--------A--C-GCC-G-C-G-T---------G-A-G--T--GA-T-G--A-A-G-G-TC----TT-CG-----------G-A-T--------C-G-T--A---AA-A-C-TC------------------------------TG-TT-A-T--T-AGG----G--A-A--G---AA-CATA-T---G-T-G--T-A--A----------G--T---------------------AA---------------------------------C--------T-------GT-…	StaAu565	StaAu563	Staphylococcus aureus
>000002383|size:2526	0.0345713	97.8%:SttMit48;97.8%:SttMit46		CC-T-AC-G-G-G-A-G-GC--A-GCA-G-T-A-G-G-G-A-A--TC-TT--CG-G-C---AA-T-G-G--AC--GG-A-A--G-T--C-T-GA-C-C-G-A--GC-A--------A--C-GCC-G-C-G-T---------G-A-G--T--GA-A-G--A-A-G-G-TT----TT-CG-----------G-A-T--------C-G-T--A---AA-G-C-TC------------------------------TG-TT-G-T--A-AGA----G--A-A--G---AA-CGAG-T---G-T-G--A-G--A----------G--T---------------------GG---------------------------------A---A----A-------GT-…	SttMit48	SttMit46	Streptococcus mitis
>000010024|size:1088	0.0344386	94.1%:CrvLanc2;94.1%:CrvLance		CC-T-AC-G-G-G-A-G-GC--A-GCA-G-T-G-G-G-G-A-A--TT-TT--GG-A-C---AA-T-G-G--GC--GA-A-A--G-C--C-T-GA-T-C-C-A--GC-C--------A--T-GCC-G-C-G-T---------G-C-A--G--GA-T-G--A-A-G-G-CC----TT-CG-----------G-G-T--------T-G-T--A---AA-C-T-GC------------------------------TT-TT-G-T--A-CGG----A--A-C--G---AA--AAG-G---T-T-T--G-G--C----------C--T---------------------AA---------------------------------T---A----A-------GC-…	CrvLanc2	CrvLance	Curvibacter lanceolatus
>000008365|size:2361	0.0343099	97.7%:PpcDi105;97.7%:PpcDi102		CC-T-AC-G-G-G-A-G-GC--A-GCA-G-T-G-G-G-G-A-A--TA-TT--GC-A-C---AA-T-G-G--GC--GA-A-A--G-C--C-T-GA-T-G-C-A--GC-A--------A--C-GCC-G-C-G-T---------G-A-G--T--GA-T-G--A-A-G-G-CC----TT-CG-----------G-G-T--------C-G-T--A---AA-A-C-TC------------------------------TG-TC-C-T--C-AAG----G--A-A--G---A-------------------------------------T---------------------AA-----------------------------------------------------…	PpcDi105	PpcDi102	Clostridioides difficile
>000004386|size:2009	0.0342598	96.7%:BcsUni10;96.7%:BcsUnif8	Bacteroides uniformis	CC-T-AC-G-G-G-A-G-GC--A-GCA-G-T-G-A-G-G-A-A--TA-TT--GG-T-C---AA-T-G-G--AC--GA-G-A--G-T--C-T-GA-A-C-C-A--GC-C--------A--A-GTA-G-C-G-T---------G-A-A--G--GA-T-G--A-C-T-G-CC-C--TA-TG-----------G-G-T--------T-G-T--A---AA-C-T-TC------------------------------TT-TT-A-T--A-CGG----G--A-A--T---AA-AGTG-A---G-G-C--A------------------C---------------------GT---------------------------------G-------------------…	BcsUni10	BcsUnif8	Bacteroides uniformis
>000011053|size:1740	0.0334613	96.6%:AcyNeui5;96.6%:AcyNeui3		CC-T-AC-G-G-G-A-G-GC--A-GCA-G-T-G-G-G-G-G-A--TA-TT--GC-A-C---AA-T-G-G--AC--GC-A-A--G-T--C-T-GA-T-G-C-A--GC-G--------A--C-GTC-G-T-G-T---------G-G-G--G--GA-T-G--A-A-G-G-CC----TT-CG-----------G-G-T--------T-G-T--A---AA-C-T-CC------------------------------TT-TC-G-C--C-TGC----G--G-A--A---AA-GGCA-G---G-G-T---------------------T---------------------TT---------------------------------G-------------------…	AcyNeui5	AcyNeui3	Acinetobacter ursingii
>000006011|size:3491	0.0331775	95.4%:EscFer15;95.2%:ShiSon39		CC-T-AC-G-G-G-A-G-GC--A-GCA-G-T-G-G-G-G-A-A--TA-TT--GC-A-C---AA-T-G-G--GC--GC-A-A--G-C--C-T-GA-T-G-C-A--GC-C--------A--T-GCC-G-C-G-T---------G-T-A--T--GA-A-G--A-A-G-G-CC----TT-CG-----------G-G-T--------T-G-T--A---AA-G-T-AC------------------------------TT-TC-A-G--C-GGG----G--A-G--G---AA--GGG-A---G-T-A--A-A--G----------T--T---------------------AA---------------------------------T---A----C-------CT-…	EscFer15	ShiSon39	Enterococcus faecium
>000010051|size:2331	0.0330631	94.1%:UndOligo;87.5%:BacPH120		CC-T-AC-G-G-G-A-G-GC--A-GCA-G-T-G-G-G-G-A-A--TT-TT--GG-A-C---AA-T-G-G--GG--GC-A-A--C-C--C-T-GA-T-C-C-A--GC-A--------A--T-GCC-G-C-G-T---------G-A-G--T--GA-A-G--A-A-G-G-CC----CT-CG-----------G-G-T--------T-G-T--A---AA-G-C-TC------------------------------TT-TT-G-T--C-AGG----G--A-A--G---AA--ACG-G---A-G-T--T-C--T----------C--T---------------------AA---------------------------------T---A----T-------AG-…	UndOligo	BacPH120	Undibacterium oligocarboniphilum
>000009956|size:547	0.0329945	97.8%:AciGui12;97.8%:AciGui11		CC-T-AC-G-G-G-A-G-GC--A-GCA-G-T-G-G-G-G-A-A--TA-TT--GG-A-C---AA-T-G-G--GG--GG-A-A--C-C--C-T-GA-T-C-C-A--GC-C--------A--T-GCC-G-C-G-T---------G-T-G--T--GA-A-G--A-A-G-G-CC----TT-AT-----------G-G-T--------T-G-T--A---AA-G-C-AC------------------------------TT-TA-A-G--C-GAG----G--A-G--G---AG--GCT-C---T-C-T--T-G--G----------T--T---------------------AA---------------------------------T---A----C-------CC-…	AciGui12	AciGui11	Acinetobacter guillouiae/iwoffii
>000006254|size:1756	0.0329295	95.0%:BifLon65;95.0%:BifLon64		CC-T-AC-G-G-G-A-G-GC--A-GCA-G-T-G-G-G-G-A-A--TA-TT--GC-A-C---AA-T-G-G--GC--GC-A-A--G-C--C-T-GA-T-G-C-A--GC-G--------A--C-GCC-G-C-G-T---------G-A-G--G--GA-T-G--G-A-G-G-CC----TT-CG-----------G-G-T--------T-G-T--A---AA-C-C-TC------------------------------TT-TT-A-T--C-GGG----G--A-G--C---AA--G-C-------------------------------G---------------------TG---------------------------------A-------------------…	BifLon65	BifLon64	Bifidobacterium longum subsp. Infantis
>000006801|size:2873	0.0326502	95.3%:BcsVul15;95.3%:BcsVul14		CC-T-AC-G-G-G-A-G-GC--A-GCA-G-T-G-A-G-G-A-A--TA-TT--GG-T-C---AA-T-G-G--GT--GA-G-A--G-C--C-T-GA-A-C-C-A--GC-C--------A--A-GTA-G-C-G-T---------G-A-A--G--GA-T-G--A-C-T-G-CC-C--TA-TG-----------G-G-T--------T-G-T--A---AA-C-T-TC------------------------------TT-TT-A-T--A-AAG----G--A-A--T---AA-AGTC-G---G-G-T--A------------------T---------------------GG---------------------------------A-------------------…	BcsVul15	BcsVul14	Bacteroides vulgatus
>000000919|size:114	0.0326488	67.6%:CorXer22;67.6%:CorFre19		CC-T-AC-G-G-G-A-G-GC--A-GCA-G-T-G-G-G-G-A-A--TA-TT--GC-A-C---AA-T-G-G--GC--GC-A-A--G-C--C-T-GA-T-G-C-A--GC-G--------A--C-GCC-G-C-G-T---------G-G-G--G--GA-T-G--A-C-G-G-CC----TT-CG-----------G-G-T--------T-G-T--A---AA-C-T-CC------------------------------TT-TC-A-G--C-CAT----G--A-C--G---AA--GCC-----------------------------CTTT--------------------TG---------------------------------G-------------------…	CorXer22	CorFre19	Corynebacterium kroppenstedtii
>000007837|size:2285	0.0323569	96.5%:PpuRhini;96.5%:PpuGorba	Peptoniphilus gorbachii	CC-T-AC-G-G-G-A-G-GC--A-GCA-G-T-G-G-G-G-A-A--TA-TT--GC-A-C---AA-T-G-G--AG--GG-A-A--C-T--C-T-GA-T-G-C-A--GC-G--------A--C-GCC-G-C-G-T---------G-A-A--C--GA-A-G--A-A-G-G-CT----TT-CG-----------A-G-T--------C-G-T--A---AA-G-T-TC------------------------------TT-TT-A-T--A-TGG----G--A-A--G---A-------------------------------------T---------------------AA-----------------------------------------------------…	PpuRhini	PpuGorba	Peptoniphilus gorbachii
>000014682|size:736	0.0323131	96.7%:KleP1010;96.7%:KleVar41		CC-T-AC-G-G-G-A-G-GC--A-GCA-G-T-G-G-G-G-A-A--TA-TT--GC-A-C---AA-T-G-G--GC--GC-A-A--G-C--C-T-GA-T-G-C-A--GC-C--------A--T-GCC-G-C-G-T---------G-T-G--T--GA-A-G--A-A-G-G-CC----TT-CG-----------G-G-T--------T-G-T--A---AA-G-C-AC------------------------------TT-TC-A-G--C-GGG----G--A-G--G---AA--GGC-G---A-T-A--A-G--G----------T--T---------------------AA---------------------------------T---A----A-------CC-…	KleP1010	KleVar41	Klebsiella pneumoniae
>000013598|size:2651	0.0322218	96.7%:KlePn689;96.7%:KlePn687		CC-T-AC-G-G-G-A-G-GC--A-GCA-G-T-G-G-G-G-A-A--TA-TT--GC-A-C---AA-T-G-G--GC--GC-A-A--G-C--C-T-GA-T-G-C-A--GC-C--------A--T-GCC-G-C-G-T---------G-T-G--T--GA-A-G--A-A-G-G-CC----TT-CG-----------G-G-T--------T-G-T--A---AA-G-C-AC------------------------------TT-TC-A-G--C-GGG----G--A-G--G---AA--GGC-G---A-T-G--A-G--G----------T--T---------------------AA---------------------------------T---A----A-------CC-…	KlePn689	KlePn687	Klebsiella pneumoniae
>000006476|size:599	0.0321073	99.8%:PntEuca4;99.8%:PntAgg53		CC-T-AC-G-G-G-A-G-GC--A-GCA-G-T-G-G-G-G-A-A--TA-TT--GC-A-C---AA-T-G-G--GC--GC-A-A--G-C--C-T-GA-T-G-C-A--GC-C--------A--T-GCC-G-C-G-T---------G-T-A--T--GA-A-G--A-A-G-G-CC----TT-CG-----------G-G-T--------T-G-T--A---AA-G-T-AC------------------------------TT-TC-A-G--C-GGG----G--A-G--G---AA--GGC-G---A-T-G--T-G--G----------T--T---------------------AA---------------------------------T---A----A-------CC-…	PntEuca4	PntAgg53	Pantoea agglomerans
>000001059|size:1391	0.0319736	96.7%:PbdDist3;94.0%:PbdDist7	Parabacteroides distasonis	CC-T-AC-G-G-G-A-G-GC--A-GCA-G-T-G-A-G-G-A-A--TA-TT--GG-T-C---AA-T-G-G--GC--GT-A-A--G-C--C-T-GA-A-C-C-A--GC-C--------A--A-GTC-G-C-G-T---------G-A-G--G--GA-T-G--A-A-G-G-TT-C--TA-TG-----------G-A-T--------C-G-T--A---AA-C-C-TC------------------------------TT-TT-A-T--A-AGG----G--A-A--T---AA-AGTG-T---G-G-G--A------------------C---------------------GT---------------------------------G-------------------…	PbdDist3	PbdDist7	Parabacteroides distasonis
>000013418|size:2450	0.0319093	94.3%:EnrCl498;94.3%:EnrCl489		CC-T-AC-G-G-G-A-G-GC--A-GCA-G-T-G-G-G-G-A-A--TA-TT--GC-A-C---AA-T-G-G--GC--GC-A-A--G-C--C-T-GA-T-G-C-A--GC-C--------A--T-GCC-G-C-G-T---------G-T-A--T--GA-A-G--A-A-G-G-CC----TT-CG-----------G-G-T--------T-G-T--A---AA-G-T-AC------------------------------TT-TC-A-G--C-GGG----G--A-G--G---AA--GGC-G---A-C-A--G-G--G----------T--T---------------------AA---------------------------------T---A----A-------CC-…	EnrCl498	EnrCl489	Enterobacter cloacae
>000007686|size:2280	0.0318115	98.0%:KleP1014;98.0%:KleP1012		CC-T-AC-G-G-G-A-G-GC--A-GCA-G-T-G-G-G-G-A-A--TA-TT--GC-A-C---AA-T-G-G--GC--GC-A-A--G-C--C-T-GA-T-G-C-A--GC-C--------A--T-GCC-G-C-G-T---------G-T-G--T--GA-A-G--A-A-G-G-CC----TT-CG-----------G-G-T--------T-G-T--A---AA-G-C-AC------------------------------TT-TC-A-G--C-GGG----G--A-G--G---AA--GGC-G---T-T-A--A-G--G----------T--T---------------------AA---------------------------------T---A----A-------CC-…	KleP1014	KleP1012	Klebsiella pneumoniae
>000008050|size:1073	0.0317113	97.7%:ClsPer92;97.7%:ClsPer91		CC-T-AC-G-G-G-A-G-GC--A-GCA-G-T-G-G-G-G-A-A--TA-TT--GC-A-C---AA-T-G-G--GG--GA-A-A--C-C--C-T-GA-T-G-C-A--GC-A--------A--C-GCC-G-C-G-T---------G-A-G--T--GA-T-G--A-A-G-G-TT----TT-CG-----------G-A-T--------C-G-T--A---AA-G-C-TC------------------------------TG-TC-T-T--T-GGG----G--A-A--G---A-------------------------------------T---------------------AA-----------------------------------------------------…	ClsPer92	ClsPer91	Clostridium perfringens
>000000727|size:2373	0.0315361	95.2%:PntCali2;95.2%:PntCalid		CC-T-AC-G-G-G-A-G-GC--A-GCA-G-T-G-G-G-G-A-A--TA-TT--GC-A-C---AA-T-G-G--GC--GC-A-A--G-C--C-T-GA-T-G-C-A--GC-C--------A--T-GCC-G-C-G-T---------G-T-A--T--GA-A-G--A-A-G-G-CC----TT-CG-----------G-G-T--------T-G-T--A---AA-G-T-AC------------------------------TT-TC-A-G--C-GGG----G--A-G--G---AA--GGG-A---T-G-G--T-G--C----------T--T---------------------AA---------------------------------T---A----C-------GC-…	PntCali2	PntCalid	Pantoea calida
>000008005|size:2373	0.0314092	97.7%:ClsPer84;97.7%:ClsPer63	Clostridium perfringens	CC-T-AC-G-G-G-A-G-GC--A-GCA-G-T-G-G-G-G-A-A--TA-TT--GC-A-C---AA-T-G-G--GG--GA-A-A--C-C--C-T-GA-T-G-C-A--GC-A--------A--C-GCC-G-C-G-T---------G-A-G--T--GA-T-G--A-A-G-G-TT----TT-CG-----------G-A-T--------C-G-T--A---AA-G-C-TC------------------------------TG-TC-T-T--T-GGG----G--A-A--G---A-------------------------------------T---------------------AA-----------------------------------------------------…	ClsPer84	ClsPer63	Clostridium perfringens
>000009237|size:10288	0.031209	94.0%:BcsFra39;94.0%:BcsFra38	Bacteroides fragilis	CC-T-AC-G-G-G-A-G-GC--A-GCA-G-T-G-A-G-G-A-A--TA-TT--GG-T-C---AA-T-G-G--GC--GC-T-A--G-C--C-T-GA-C-C-C-A--GC-C--------A--A-GTA-G-C-G-T---------G-A-A--G--GA-T-G--A-A-G-G-CT-C--TA-TG-----------G-G-T--------C-G-T--A---AA-C-T-TC------------------------------TT-TT-A-T--A-TAA----G--A-A--T---AA-AGTG-C---A-G-T--A------------------T---------------------GT---------------------------------A-------------------…	BcsFra39	BcsFra38	Bacteroides fragilis
>000002523|size:1986	0.0310193	96.7%:StaAu564;96.7%:EntFa534		C--T-AC-G-G-G-A-G-GC--A-GCA-G-T-A-G-G-G-A-A--TC-TT--CG-G-C---AA-T-G-G--AC--GA-A-A--G-T--C-T-GA-C-C-G-A--GC-A--------A--C-GCC-G-C-G-T---------G-A-G--T--GA-A-G--A-A-G-G-TT----TT-CG-----------G-A-T--------C-G-T--A---AA-A-C-TC------------------------------TG-TT-G-T--T-AGA----G--A-A--G---AA-CAAG-G---A-C-G--T-T--A----------G--T---------------------AA---------------------------------C--------T-------GA-…	StaAu564	EntFa534	Enterococcus faecalis
>000012339|size:2067	0.0307708	96.7%:StaEpi99;96.7%:StaEpi80		CC-T-AC-G-G-G-A-G-GC--A-GCA-G-T-A-G-G-G-A-A--TC-TT--CC-G-C---AA-T-G-G--GC--GA-A-A--G-C--T-T-GA-C-G-G-A--GC-A--------A--C-GCC-G-C-G-T---------G-A-G--T--GA-T-G--A-A-G-G-TC----TT-CG-----------G-A-T--------C-G-T--A---AA-A-C-TC------------------------------TG-TT-A-T--T-AGG----G--A-A--G---AA-CAAA-T---G-T-G--T-A--A----------G--T---------------------AA---------------------------------C--------T-------AT-…	StaEpi99	StaEpi80	Staphylococcus epidermidis
>000010426|size:2834	0.0307538	95.4%:StaAu564;95.4%:EntFa534		CC-T-AC-G-G-G-A-G-GC--A-GCA-G-T-A-G-G-G-A-A--TC-TT--CG-G-C---AA-T-G-G--AC--GA-A-A--G-T--C-T-GA-C-C-G-A--GC-A--------A--C-GCC-G-C-G-T---------G-A-G--T--GA-A-G--A-A-G-G-TT----TT-CG-----------G-A-T--------C-G-T--A---AA-A-C-TC------------------------------TG-TT-G-T--T-AGA----G--A-A--G---AA-CAAG-G---A-C-G--T-T--A----------G--T---------------------AA---------------------------------C--------T-------GA-…	StaAu564	EntFa534	Enterococcus faecalis
>000007921|size:2023	0.0303182	99.8%:FinMag11;99.8%:FinMag10		CC-T-AC-G-G-G-A-G-GC--A-GCA-G-T-G-G-G-G-A-A--TA-TT--GC-A-C---AA-T-G-G--GG--GA-A-A--C-C--C-T-GA-T-G-C-A--GC-G--------A--C-GCC-G-C-G-T---------G-A-A--C--GA-A-G--A-A-G-G-TA----TT-CG-----------T-A-T--------C-G-T--A---AA-G-T-TC------------------------------TG-TC-C-T--A-TGG----G--A-A--G---A-------------------------------------T---------------------AA-----------------------------------------------------…	FinMag11	FinMag10	Finegoldia magna
>000002513|size:292	0.0302573	95.6%:StaAu564;95.6%:EntFa534		C--T-AC-A-G-G-A-G-GC--A-GCA-G-T-A-G-G-G-A-A--TC-TT--CG-G-C---AA-T-G-G--AC--GA-A-A--G-T--C-T-GA-C-C-G-A--GC-A--------A--C-GCC-G-C-G-T---------G-A-G--T--GA-A-G--A-A-G-G-TT----TT-CG-----------G-A-T--------C-G-T--A---AA-A-C-TC------------------------------TG-TT-G-T--T-AGA----G--A-A--G---AA-CAAG-G---A-C-G--T-T--A----------G--T---------------------AA---------------------------------C--------T-------GA-…	StaAu564	EntFa534	Enterococcus faecalis
>000007535|size:2546	0.0300506	95.1%:BcsDor17;95.1%:BcsDor16		CC-T-AC-G-G-G-A-G-GC--A-GCA-G-T-G-A-G-G-A-A--TA-TT--GG-T-C---AA-T-G-G--GC--GA-T-G--G-C--C-T-GA-A-C-C-A--GC-C--------A--A-GTC-G-C-G-T---------G-A-A--G--GA-T-G--A-C-T-G-CC-C--TA-TG-----------G-G-T--------T-G-T--A---AA-C-T-TC------------------------------TT-TT-A-T--A-AAG----G--A-A--T---AA-AGTC-G---G-G-T--A------------------T---------------------GC---------------------------------A-------------------…	BcsDor17	BcsDor16	Bacteroides dorei
>000005803|size:1123	0.0300452	97.8%:KleOx208;97.8%:KleOx207		CC-T-AC-G-G-G-A-G-GC--A-GCA-G-T-G-G-G-G-A-A--TA-TT--GC-A-C---AA-T-G-G--GC--GC-A-A--G-C--C-T-GA-T-G-C-A--GC-C--------A--T-GCC-G-C-G-T---------G-T-A--T--GA-A-G--A-A-G-G-CC----TT-CG-----------G-G-T--------T-G-T--A---AA-G-T-AC------------------------------TT-TC-A-G--C-GGG----G--A-G--G---AA--GGG-A---G-T-G--A-G--G----------T--T---------------------AA---------------------------------T---A----A-------CC-…	KleOx208	KleOx207	Klebsiella oxytoca
>000010928|size:1947	0.0300113	96.7%:CtbBra18;96.7%:CtbBra17	Citrobacter braakii	CC-T-AC-G-G-G-A-G-GC--A-GCA-G-T-G-G-G-G-A-A--TA-TT--GC-A-C---AA-T-G-G--GC--GC-A-A--G-C--C-T-GA-T-G-C-A--GC-C--------A--T-GCC-G-C-G-T---------G-T-A--T--GA-A-G--A-A-G-G-CC----TT-CG-----------G-G-T--------T-G-T--A---AA-G-T-AC------------------------------TT-TC-A-G--C-GAG----G--A-G--G---AA--GGT-G---T-T-G--T-G--G----------T--T---------------------AA---------------------------------T---A----A-------CC-…	CtbBra18	CtbBra17	Citrobacter braakii
>000013971|size:2266	0.0298706	98.0%:BcsFra39;98.0%:BcsFra38		CC-T-AC-G-G-G-A-G-GC--A-GCA-G-T-G-A-G-G-A-A--TA-TT--GG-T-C---AA-T-G-G--GC--GC-T-A--G-C--C-T-GA-A-C-C-A--GC-C--------A--A-GTA-G-C-G-T---------G-A-A--G--GA-T-G--A-A-G-G-CT-C--TA-TG-----------G-G-T--------C-G-T--A---AA-C-T-TC------------------------------TT-TT-A-T--A-TAA----G--A-A--T---AA-AGTG-C---A-G-T--A------------------T---------------------GT---------------------------------A-------------------…	BcsFra39	BcsFra38	Bacteroides fragilis
>000006664|size:3303	0.0298326	97.8%:KleVar40;97.8%:KlePn961		CC-T-AC-G-G-G-A-G-GC--A-GCA-G-T-G-G-G-G-A-A--TA-TT--GC-A-C---AA-T-G-G--GC--GC-A-A--G-C--C-T-GA-T-G-C-A--GC-C--------A--T-GCC-G-C-G-T---------G-T-G--T--GA-A-G--A-A-G-G-CC----TT-CG-----------G-G-T--------T-G-T--A---AA-G-C-AC------------------------------TT-TC-A-G--C-GGG----G--A-G--G---AA--GGC-G---G-T-G--A-G--G----------T--T---------------------AA---------------------------------T---A----A-------CC-…	KleVar40	KlePn961	Klebsiella pneumoniae
>000002528|size:641	0.0295668	96.9%:StaAu564;96.9%:EntFa534		CC-T-AC-G-G-G-A-G-GC--A-GCA-G-T-A-G-G-G-A-A--TC-TT--CG-G-C---AA-T-G-G--AC--GA-A-A--G-T--C-T-GA-C-C-G-A--GC-A--------A--C-GCC-G-C-G-T---------G-A-G--T--GA-A-G--A-A-G-G-TT----TT-CG-----------G-A-T--------C-G-T--A---AA-A-C-TC------------------------------TG-TT-G-T--T-AGA----G--A-A--G---AA-CAAG-G---A-C-G--T-T--A----------G--T---------------------AA---------------------------------C--------T-------GA-…	StaAu564	EntFa534	Enterococcus faecalis
>000014836|size:755	0.0295007	95.2%:EnrCl498;95.2%:EnrCl489		CC-T-AC-G-G-G-A-G-GC--A-GCA-G-T-G-G-G-G-A-A--TA-TT--GC-A-C---AA-T-G-G--GC--GC-A-A--G-C--C-T-GA-T-G-C-A--GC-C--------A--T-GCC-G-C-G-T---------G-T-A--T--GA-A-G--A-A-G-G-CC----TT-CG-----------G-G-T--------T-G-T--A---AA-G-T-AC------------------------------TT-TC-A-G--C-GGG----G--A-G--G---AA--GGC-G---A-C-A--G-G--G----------T--T---------------------AA---------------------------------T---A----A-------CC-…	EnrCl498	EnrCl489	Enterobacter cloacae
>000003536|size:2802	0.0294784	92.5%:VeiPar11;92.5%:VeiTobe3	Veillonella parvula	CC-T-AC-G-G-G-A-G-GC--A-GCA-G-T-G-G-G-G-A-A--TC-TT--CC-G-C---AA-T-G-G--AC--GA-A-A--G-T--C-T-GA-C-G-G-A--GC-A--------A--C-GCC-G-C-G-T---------G-A-G--T--GA-T-G--A-C-G-G-CC----TT-CG-----------G-G-T--------T-G-T--A---AA-G-C-TC------------------------------TG-TT-A-A--T-CGG----G--A-C--G---AA-AGGC-C---T-T-C--T-T--G----------C--A---------------------AA---------------------------------T---A----G-------TG-…	VeiPar11	VeiTobe3	Veillonella parvula
>000014659|size:1274	0.029443	95.4%:EnrCl527;95.4%:EnrCl526		CC-T-AC-G-G-G-A-G-GC--A-GCA-G-T-G-G-G-G-A-A--TA-TT--GC-A-C---AA-T-G-G--GC--GC-A-A--G-C--C-T-GA-T-G-C-A--GC-C--------A--T-GCC-G-C-G-T---------G-T-A--T--GA-A-G--A-A-G-G-CC----TT-CG-----------G-G-T--------T-G-T--A---AA-G-T-AC------------------------------TT-TC-A-G--C-GGG----G--A-G--G---AA--GGC-G---A-T-A--A-A--G----------T--T---------------------AA---------------------------------T---A----A-------CC-…	EnrCl527	EnrCl526	Enterobacter cloacae
>000012406|size:2279	0.0288342	98.0%:StaEpi99;98.0%:StaEpi80		CC-T-AC-G-G-G-A-G-GC--A-GCA-G-T-A-G-G-G-A-A--TC-TT--CC-G-C---AA-T-G-G--GC--GA-A-A--G-C--T-T-GA-C-G-G-A--GC-A--------A--C-GCC-G-C-G-T---------G-A-G--T--GA-T-G--A-A-G-G-TC----TT-CG-----------G-A-T--------C-G-T--A---AA-A-C-TC------------------------------TG-TT-A-T--T-AGG----G--A-A--G---AA-CAAA-T---G-T-G--T-A--A----------G--T---------------------AA---------------------------------C--------T-------AT-…	StaEpi99	StaEpi80	Staphylococcus epidermidis
>000004063|size:1938	0.0287517	96.7%:LacGas25;96.7%:LacGas24		CC-T-AC-G-G-G-A-G-GC--A-GCA-G-T-A-G-G-G-A-A--TC-TT--CC-A-C---AA-T-G-G--AC--GC-A-A--G-T--C-T-GA-T-G-G-A--GC-A--------A--C-GCC-G-C-G-T---------G-A-G--T--GA-A-G--A-A-G-G-GT----TT-CG-----------G-C-T--------C-G-T--A---AA-G-C-TC------------------------------TG-TT-G-G--T-AGT----G--A-A--G---AA-AGAT-A---G-A-G--G-T--A----------G--T---------------------AA---------------------------------C--------T-------GG-…	LacGas25	LacGas24	Lactobacillus gasseri
>000011308|size:1352	0.028592	98.0%:EnrCl501;98.0%:RaoTer16		CC-T-AC-G-G-G-A-G-GC--A-GCA-G-T-G-G-G-G-A-A--TA-TT--GC-A-C---AA-T-G-G--GC--GC-A-A--G-C--C-T-GA-T-G-C-A--GC-C--------A--T-GCC-G-C-G-T---------G-T-A--T--GA-A-G--A-A-G-G-CC----TT-CG-----------G-G-T--------T-G-T--A---AA-G-T-AC------------------------------TT-TC-A-G--C-GGG----G--A-G--G---AA--GGC-G---A-T-A--A-G--G----------T--T---------------------AA---------------------------------T---A----A-------CC-…	EnrCl501	RaoTer16	Enterobacter cloacae
>000008799|size:1638	0.0284155	94.9%:ClsTert4;94.9%:ClsTert3		CC-T-AC-G-G-G-A-G-GC--A-GCA-G-T-G-G-G-G-A-A--TA-TT--GC-A-C---AA-T-G-G--GG--GG-A-A--C-C--C-T-GA-T-G-C-A--GC-A--------A--C-GCC-G-C-G-T---------G-A-G--T--GA-T-G--A-A-G-G-TT----TT-CG-----------G-A-T--------C-G-T--A---AA-G-C-TC------------------------------TG-TC-T-T--C-AGG----G--A-C--G---A-------------------------------------T---------------------AA-----------------------------------------------------…	ClsTert4	ClsTert3	Clostridium tertium
>000002159|size:1747	0.0283203	94.1%:CrvLanc2;94.1%:CrvLance		CC-T-AC-G-G-G-A-G-GC--A-GCA-G-T-G-G-G-G-A-A--TT-TT--GG-A-C---AA-T-G-G--GC--GA-A-A--G-C--C-T-GA-T-C-C-A--GC-C--------A--T-GCC-G-C-G-T---------G-C-A--G--GA-T-G--A-A-G-G-CC----TT-CG-----------G-G-T--------T-G-T--A---AA-C-T-GC------------------------------TT-TT-G-T--A-CGG----A--A-C--G---AA--AAG-G---T-T-T--G-G--C----------C--T---------------------AA---------------------------------T---A----A-------GC-…	CrvLanc2	CrvLance	Curvibacter lanceolatus
>000002529|size:1382	0.0282068	99.8%:StaAu564;99.8%:EntFa534		C--T-AC-G-G-G-A-G-GC--A-GCA-G-T-A-G-G-G-A-A--TC-TT--CG-G-C---AA-T-G-G--AC--GA-A-A--G-T--C-T-GA-C-C-G-A--GC-A--------A--C-GCC-G-C-G-T---------G-A-G--T--GA-A-G--A-A-G-G-TT----TT-CG-----------G-A-T--------C-G-T--A---AA-A-C-TC------------------------------TG-TT-G-T--T-AGA----G--A-A--G---AA-CAAG-G---A-C-G--T-T--A----------G--T---------------------AA---------------------------------C--------T-------GA-…	StaAu564	EntFa534	Enterococcus faecalis
>000001131|size:2253	0.0279899	98.0%:KleP1014;98.0%:KleP1012		CC-T-AC-G-G-G-A-G-GC--A-GCA-G-T-G-G-G-G-A-A--TA-TT--GC-A-C---AA-T-G-G--GC--GC-A-A--G-C--C-T-GA-T-G-C-A--GC-C--------A--T-GCC-G-C-G-T---------G-T-G--T--GA-A-G--A-A-G-G-CC----TT-CG-----------G-G-T--------T-G-T--A---AA-G-C-AC------------------------------TT-TC-A-G--C-GGG----G--A-G--G---AA--GGC-G---T-T-A--A-G--G----------T--T---------------------AA---------------------------------T---A----A-------CC-…	KleP1014	KleP1012	Klebsiella pneumoniae
>000013020|size:1279	0.0279887	96.7%:EnrCl498;96.7%:EnrCl489		CC-T-AC-G-G-G-A-G-GC--A-GCA-G-T-G-G-G-G-A-A--TA-TT--GC-A-C---AA-T-G-G--GC--GC-A-A--G-C--C-T-GA-T-G-C-A--GC-C--------A--T-GCC-G-C-G-T---------G-T-A--T--GA-A-G--A-A-G-G-CC----TT-CG-----------G-G-T--------T-G-T--A---AA-G-T-AC------------------------------TT-TC-A-G--C-GGG----G--A-G--G---AA--GGC-G---A-C-A--G-G--G----------T--T---------------------AA---------------------------------T---A----A-------CC-…	EnrCl498	EnrCl489	Enterobacter cloacae
>000015710|size:4629	0.0278309	97.8%:StaEp124;97.8%:StaEp123		CC-T-AC-G-G-G-A-G-GC--A-GCA-G-T-A-G-G-G-A-A--TC-TT--CC-G-C---AA-T-G-G--GC--GA-A-A--G-C--C-T-GA-C-G-G-A--GC-A--------A--C-GCC-G-C-G-T---------G-A-G--T--GA-T-G--A-A-G-G-TC----TT-CG-----------G-A-T--------C-G-T--A---AA-A-C-TC------------------------------TG-TT-A-T--T-AGG----G--A-A--G---AA-CAAA-T---G-T-G--T-A--A----------G--T---------------------AA---------------------------------C--------T-------AT-…	StaEp124	StaEp123	Staphylococcus epidermidis
>000006695|size:3658	0.0277396	95.4%:RaoOrn60;95.4%:RaoOrn59		CC-T-AC-G-G-G-A-G-GC--A-GCA-G-T-G-G-G-G-A-A--TA-TT--GC-A-C---AA-T-G-G--GC--GC-A-A--G-C--C-T-GA-T-G-C-A--GC-C--------A--T-GCC-G-C-G-T---------G-T-A--T--GA-A-G--A-A-G-G-CC----TT-CG-----------G-G-T--------T-G-T--A---AA-G-T-AC------------------------------TT-TC-A-G--C-GAG----G--A-G--G---AA--GGC-G---A-C-A--A-G--G----------T--T---------------------AA---------------------------------T---A----A-------CC-…	RaoOrn60	RaoOrn59	Raoultella ornithinolytica
>000013538|size:2288	0.0276924	95.2%:KleOx242;95.2%:KleOx241		CC-T-AC-G-G-G-A-G-GC--A-GCA-G-T-G-G-G-G-A-A--TA-TT--GC-A-C---AA-T-G-G--GC--GC-A-A--G-C--C-T-GA-T-G-C-A--GC-C--------A--T-GCC-G-C-G-T---------G-T-A--T--GA-A-G--A-A-G-G-CC----TT-CG-----------G-G-T--------T-G-T--A---AA-G-T-AC------------------------------TT-TC-A-G--C-GGG----G--A-G--G---AA--GGC-G---A-T-A--A-G--G----------T--T---------------------AA---------------------------------T---A----A-------CC-…	KleOx242	KleOx241	Klebsiella oxytoca
>000011895|size:1372	0.0276694	94.1%:VeiSpe35;94.1%:VeiSpe33		CC-T-AC-G-G-G-A-G-GC--A-GCA-G-T-G-G-G-G-A-A--TC-TT--CC-G-C---AA-T-G-G--AC--GA-A-A--G-T--C-T-GA-C-G-G-A--GC-A--------A--C-GCC-G-C-G-T---------G-A-G--C--GA-T-G--A-C-G-G-CC----TT-CG-----------G-G-T--------T-G-T--A---AA-G-C-TC------------------------------TG-TT-A-A--T-CGG----G--A-C--G---AA-AGGC-C---T-T-C--T-T--G----------C--G---------------------AA---------------------------------T---A----G-------TG-…	VeiSpe35	VeiSpe33	Veillonella parvula
>000002165|size:1336	0.0275104	94.1%:CrvLanc2;94.1%:CrvLance		CC-T-AC-G-G-G-A-G-GC--A-GCA-G-T-G-G-G-G-A-A--TT-TT--GG-A-C---AA-T-G-G--GC--GA-A-A--G-C--C-T-GA-T-C-C-A--GC-C--------A--T-GCC-G-C-G-T---------G-C-A--G--GA-T-G--A-A-G-G-CC----TT-CG-----------G-G-T--------T-G-T--A---AA-C-T-GC------------------------------TT-TT-G-T--A-CGG----A--A-C--G---AA--AAG-G---T-T-T--G-G--C----------C--T---------------------AA---------------------------------T---A----A-------GC-…	CrvLanc2	CrvLance	Curvibacter lanceolatus
>000005805|size:1387	0.0274806	96.7%:KleOx239;96.7%:KleOx235		CC-T-AC-G-G-G-A-G-GC--A-GCA-G-T-G-G-G-G-A-A--TA-TT--GC-A-C---AA-T-G-G--GC--GC-A-A--G-C--C-T-GA-T-G-C-A--GC-C--------A--T-GCC-G-C-G-T---------G-T-A--T--GA-A-G--A-A-G-G-CC----TT-CG-----------G-G-T--------T-G-T--A---AA-G-T-AC------------------------------TT-TC-A-G--C-GGG----G--A-G--G---AA--GGG-A---G-T-G--A-G--G----------T--T---------------------AA---------------------------------T---A----A-------CC-…	KleOx239	KleOx235	Klebsiella oxytoca
>000007424|size:2221	0.0274392	97.6%:BcsVul12;95.1%:BcsVul15		CC-T-AC-G-G-G-A-G-GC--A-GCA-G-T-G-A-G-G-A-A--TA-TT--GG-T-C---AA-T-G-G--GC--GA-G-A--G-C--C-T-GA-A-C-C-A--GC-C--------A--A-GTA-G-C-G-T---------G-A-A--G--GA-T-G--A-C-T-G-CC-C--TA-TG-----------G-G-T--------T-G-T--A---AA-C-T-TC------------------------------TT-TT-A-T--A-AAG----G--A-A--T---AA-AGTC-G---G-G-T--A------------------T---------------------GT---------------------------------A-------------------…	BcsVul12	BcsVul15	Bacteroides vulgatus
>000009204|size:1713	0.0274185	96.7%:StaHae56;96.7%:StaEpi93		CC-T-AC-G-G-G-A-G-GC--A-GCA-G-T-A-G-G-G-A-A--TC-TT--CC-G-C---AA-T-G-G--GC--GA-A-A--G-C--C-T-GA-C-G-G-A--GC-A--------A--C-GCC-G-C-G-T---------G-A-G--T--GA-T-G--A-A-G-G-TC----TT-CG-----------G-A-T--------C-G-T--A---AA-A-C-TC------------------------------TG-TT-A-T--T-AGG----G--A-A--G---AA-CATA-C---G-T-G--T-A--A----------G--T---------------------AA---------------------------------C--------T-------AT-…	StaHae56	StaEpi93	Staphylococcus haemolyticus
>000010985|size:1440	0.0273645	96.7%:EnrCl529;96.7%:EnrCl528		CC-T-AC-G-G-G-A-G-GC--A-GCA-G-T-G-G-G-G-A-A--TA-TT--GC-A-C---AA-T-G-G--GC--GC-A-A--G-C--C-T-GA-T-G-C-A--GC-C--------A--T-GCC-G-C-G-T---------G-T-A--T--GA-A-G--A-A-G-G-CC----TT-CG-----------G-G-T--------T-G-T--A---AA-G-T-AC------------------------------TT-TC-A-G--C-GGG----G--A-G--G---AA--GGT-G---T-T-G--A-G--G----------T--T---------------------AA---------------------------------T---A----A-------CC-…	EnrCl529	EnrCl528	Enterobacter cloacae
>000006195|size:2050	0.0272771	93.6%:PntCali2;93.6%:PntCalid		CC-T-AC-G-G-G-A-G-GC--A-GCA-G-T-G-G-G-G-A-A--TA-TT--GC-A-C---AA-T-G-G--GC--GC-A-A--G-C--C-T-GA-T-G-C-A--GC-C--------A--T-GCC-G-C-G-T---------G-T-A--T--GA-A-G--A-A-G-G-CC----TT-CG-----------G-G-T--------T-G-T--A---AA-G-T-AC------------------------------TT-TC-A-G--C-GGG----G--A-G--G---AA--GGG-A---T-A-G--C-G--C----------T--T---------------------AA---------------------------------T---A----C-------GC-…	PntCali2	PntCalid	Pantoea calida
>000010421|size:2091	0.0271055	95.4%:StaAu564;95.4%:EntFa534		CC-T-AC-G-G-G-A-G-GC--A-GCA-G-T-A-G-G-G-A-A--TC-TT--CG-G-C---AA-T-G-G--AC--GA-A-A--G-T--C-T-GA-C-C-G-A--GC-A--------A--C-GCC-G-C-G-T---------G-A-G--T--GA-A-G--A-A-G-G-TT----TT-CG-----------G-A-T--------C-G-T--A---AA-A-C-TC------------------------------TG-TT-G-T--T-AGA----G--A-A--G---AA-CAAG-G---A-C-G--T-T--A----------G--T---------------------AA---------------------------------C--------T-------GA-…	StaAu564	EntFa534	Enterococcus faecalis
>000002090|size:2038	0.0269551	96.7%:SttAng69;96.7%:SttAng68		CC-T-AC-G-G-G-A-G-GC--A-GCA-G-T-A-G-G-G-A-A--TC-TT--CG-G-C---AA-T-G-G--GG--GG-A-A--C-C--C-T-GA-C-C-G-A--GC-A--------A--C-GCC-G-C-G-T---------G-A-G--T--GA-A-G--A-A-G-G-TT----TT-CG-----------G-A-T--------C-G-T--A---AA-G-C-TC------------------------------TG-TT-G-T--T-AAG----G--A-A--G---AA-CGAG-T---G-T-G--A-G--A----------A--T---------------------GG---------------------------------A---A----A-------GT-…	SttAng69	SttAng68	Streptococcus anginosus
>000012983|size:1940	0.0258748	95.4%:KleOx242;95.4%:KleOx241		CC-T-AC-G-G-G-A-G-GC--A-GCA-G-T-G-G-G-G-A-A--TA-TT--GC-A-C---AA-T-G-G--GC--GC-A-A--G-C--C-T-GA-T-G-C-A--GC-C--------A--T-GCC-G-C-G-T---------G-T-A--T--GA-A-G--A-A-G-G-CC----TT-CG-----------G-G-T--------T-G-T--A---AA-G-T-AC------------------------------TT-TC-A-G--C-GGG----G--A-G--G---AA--GGC-G---A-T-A--A-G--G----------T--T---------------------AA---------------------------------T---A----A-------CC-…	KleOx242	KleOx241	Klebsiella oxytoca
>000012822|size:3300	0.0257553	95.4%:ShiSon39;95.4%:Esch1638		CC-T-AC-G-G-G-A-G-GC--A-GCA-G-T-G-G-G-G-A-A--TA-TT--GC-A-C---AA-T-G-G--GC--GC-A-A--G-C--C-T-GA-T-G-C-A--GC-C--------A--T-GCC-G-C-G-T---------G-T-A--T--GA-A-G--A-A-G-G-CC----TT-CG-----------G-G-T--------T-G-T--A---AA-G-T-AC------------------------------TT-TC-A-G--C-GGG----G--A-G--G---AA--GGG-A---G-T-A--A-A--G----------T--T---------------------AA---------------------------------T---A----C-------CT-…	ShiSon39	Esch1638	Escherichia/Shigella
>000007713|size:1967	0.0254739	96.5%:ClsPar22;96.5%:ClsPar21		CC-T-AC-G-G-G-A-G-GC--A-GCA-G-T-G-G-G-G-A-A--TA-TT--GC-A-C---AA-T-G-G--GG--GA-A-A--C-C--C-T-GA-T-G-C-A--GC-A--------A--C-GCC-G-C-G-T---------G-A-G--T--GA-T-G--A-C-G-G-CC----TT-CG-----------G-G-T--------T-G-T--A---AA-G-C-TC------------------------------TG-TC-T-T--T-GGG----G--A-C--G---A-------------------------------------T---------------------AA-----------------------------------------------------…	ClsPar22	ClsPar21	Clostridium paraputrificum
>000006379|size:2269	0.0253761	99.8%:KleP1010;99.8%:KleVar41		CC-T-AC-G-G-G-A-G-GC--A-GCA-G-T-G-G-G-G-A-A--TA-TT--GC-A-C---AA-T-G-G--GC--GC-A-A--G-C--C-T-GA-T-G-C-A--GC-C--------A--T-GCC-G-C-G-T---------G-T-G--T--GA-A-G--A-A-G-G-CC----TT-CG-----------G-G-T--------T-G-T--A---AA-G-C-AC------------------------------TT-TC-A-G--C-GGG----G--A-G--G---AA--GGC-G---A-T-A--A-G--G----------T--T---------------------AA---------------------------------T---A----A-------CC-…	KleP1010	KleVar41	Klebsiella pneumoniae
>000007840|size:1680	0.0252132	96.5%:PpuAsac4;96.5%:PpuGross		CC-T-AC-G-G-G-A-G-GC--A-GCA-G-T-G-G-G-G-A-A--TA-TT--GC-A-C---AA-T-G-G--AG--GG-A-A--C-T--C-T-GA-T-G-C-A--GC-G--------A--C-GCC-G-C-G-T---------G-A-A--C--GA-A-G--A-A-G-G-CT----TT-CG-----------A-G-T--------C-G-T--A---AA-G-T-TC------------------------------TT-TT-A-T--A-TGG----G--A-A--G---A-------------------------------------T---------------------AA-----------------------------------------------------…	PpuAsac4	PpuGross	Peptoniphilus asaccharolyticus
>000010690|size:124	0.0248819	95.4%:StaAu564;95.4%:EntFa534		C--T-AC-G-T-G-A-G-GC--A-GCA-G-T-A-G-G-G-A-A--TC-TT--CG-G-C---AA-T-G-G--AC--GA-A-A--G-T--C-T-GA-C-C-G-A--GC-A--------A--C-GCC-G-C-G-T---------G-A-G--T--GA-A-G--A-A-G-G-TT----TT-CG-----------G-A-T--------C-G-T--A---AA-A-C-TC------------------------------TG-TT-G-T--T-AGA----G--A-A--G---AA-CAAG-G---A-C-G--T-T--A----------G--T---------------------AA---------------------------------C--------T-------GA-…	StaAu564	EntFa534	Enterococcus faecalis
>000003018|size:1250	0.0246474	96.7%:StaWar47;96.7%:AciBa511		CC-T-AA-G-G-G-A-G-GC--A-GCA-G-T-A-G-G-G-A-A--TC-TT--CC-G-C---AA-T-G-G--GC--GA-A-A--G-C--C-T-GA-C-G-G-A--GC-A--------A--C-GCC-G-C-G-T---------G-A-G--T--GA-T-G--A-A-G-G-TC----TT-CG-----------G-A-T--------C-G-T--A---AA-A-C-TC------------------------------TG-TT-A-T--C-AGG----G--A-A--G---AA-CAAA-T---G-T-G--T-A--A----------G--T---------------------AA---------------------------------C--------T-------GT-…	StaWar47	AciBa511	Staphylococcus warneri
>000005073|size:1868	0.0246064	94.1%:StaEp124;94.1%:StaEp123		CC-T-AC-G-G-G-A-G-GC--A-GCA-G-T-A-G-G-G-A-A--TC-TT--CC-G-C---AA-T-G-G--GC--GA-A-A--G-C--C-T-GA-C-G-G-A--GC-A--------A--C-GCC-G-C-G-T---------G-A-G--T--GA-T-G--A-A-G-G-TC----TT-CG-----------G-A-T--------C-G-T--A---AA-A-C-TC------------------------------TG-TT-A-T--T-AGG----G--A-A--G---AA-TAAA-T---G-T-G--T-A--A----------G--T---------------------AA---------------------------------C--------T-------AT-…	StaEp124	StaEp123	Staphylococcus epidermidis
>000012601|size:1485	0.0245245	94.1%:ShiSon39;94.1%:Esch1638		CC-T-AC-G-G-G-A-G-GC--A-GCA-G-T-G-G-G-G-A-A--TA-TT--GC-A-C---AA-T-G-G--GC--GC-A-A--G-C--C-T-GA-T-G-C-A--GC-C--------A--T-GCC-G-C-G-T---------G-T-A--T--GA-A-G--A-A-G-G-CC----TT-CG-----------G-G-T--------T-G-T--A---AA-G-T-AC------------------------------TT-TC-A-G--C-GGG----G--A-G--G---AA--GGG-A---G-T-A--A-A--G----------T--T---------------------AA---------------------------------T---A----C-------CT-…	ShiSon39	Esch1638	Escherichia/Shigella
>000005718|size:2519	0.0244638	94.1%:ShiSon39;94.1%:Esch1638		CC-T-AC-G-G-G-A-G-GC--A-GCA-G-T-G-G-G-G-A-A--TA-TT--GC-A-C---AA-T-G-G--GC--GC-A-A--G-C--C-T-GA-T-G-C-A--GC-C--------A--T-GCC-G-C-G-T---------G-T-A--T--GA-A-G--A-A-G-G-CC----TT-CG-----------G-G-T--------T-G-T--A---AA-G-T-AC------------------------------TT-TC-A-G--C-GGG----G--A-G--G---AA--GGG-A---G-T-A--A-A--G----------T--T---------------------AA---------------------------------T---A----C-------CT-…	ShiSon39	Esch1638	Escherichia/Shigella
>000003541|size:1424	0.0242295	92.5%:VeiPar11;92.5%:VeiTobe3		CC-T-AC-G-G-G-A-G-GC--A-GCA-G-T-G-G-G-G-A-A--TC-TT--CC-G-C---AA-T-G-G--AC--GA-A-A--G-T--C-T-GA-C-G-G-A--GC-A--------A--C-GCC-G-C-G-T---------G-A-G--T--GA-T-G--A-C-G-G-CC----TT-CG-----------G-G-T--------T-G-T--A---AA-G-C-TC------------------------------TG-TT-A-A--T-CGG----G--A-C--G---AA-AGGC-C---T-T-C--T-T--G----------C--A---------------------AA---------------------------------T---A----G-------TG-…	VeiPar11	VeiTobe3	Veillonella parvula
>000013306|size:1580	0.0242117	96.7%:KleVar40;96.7%:KlePn961		CC-T-AC-G-G-G-A-G-GC--A-GCA-G-T-G-G-G-G-A-A--TA-TT--GC-A-C---AA-T-G-G--GC--GC-A-A--G-C--C-T-GA-T-G-C-A--GC-C--------A--T-GCC-G-C-G-T---------G-T-G--T--GA-A-G--A-A-G-G-CC----TT-CG-----------G-G-T--------T-G-T--A---AA-G-C-AC------------------------------TT-TC-A-G--C-GGG----G--A-G--G---AA--GGC-G---G-T-G--A-G--G----------T--T---------------------AA---------------------------------T---A----A-------CC-…	KleVar40	KlePn961	Klebsiella pneumoniae
>000009340|size:1277	0.0241139	96.7%:BcsFra39;96.7%:BcsFra38		CC-T-AC-G-G-G-A-G-GC--A-GCA-G-T-G-A-G-G-A-A--TA-TT--GG-T-C---AA-T-G-G--GC--GC-T-A--G-C--C-T-GA-A-C-C-A--GC-C--------A--A-GTA-G-C-G-T---------G-A-A--G--GA-T-G--A-A-G-G-CT-C--TA-TG-----------G-G-T--------C-G-T--A---AA-C-T-TC------------------------------TT-TT-A-T--A-TAA----G--A-A--T---AA-AGTG-C---A-G-T--A------------------T---------------------GT---------------------------------A-------------------…	BcsFra39	BcsFra38	Bacteroides fragilis
>000007922|size:1626	0.0240739	97.0%:FinMag11;97.0%:FinMag10		CC-T-AC-G-G-G-A-G-GC--A-GCA-G-T-G-G-G-G-A-A--TA-TT--GC-A-C---AA-T-G-G--GG--GA-A-A--C-C--C-T-GA-T-G-C-A--GC-G--------A--C-GCC-G-C-G-T---------G-A-A--C--GA-A-G--A-A-G-G-TA----TT-CG-----------T-A-T--------C-G-T--A---AA-G-T-TC------------------------------TG-TC-C-T--A-TGG----G--A-A--G---A-------------------------------------T---------------------AA-----------------------------------------------------…	FinMag11	FinMag10	Finegoldia magna
>000012606|size:2699	0.0236351	94.1%:ShiSon39;94.1%:Esch1638		CC-T-AC-G-G-G-A-G-GC--A-GCA-G-T-G-G-G-G-A-A--TA-TT--GC-A-C---AA-T-G-G--GC--GC-A-A--G-C--C-T-GA-T-G-C-A--GC-C--------A--T-GCC-G-C-G-T---------G-T-A--T--GA-A-G--A-A-G-G-CC----TT-CG-----------G-G-T--------T-G-T--A---AA-G-T-AC------------------------------TT-TC-A-G--C-GGG----G--A-G--G---AA--GGG-A---G-T-A--A-A--G----------T--T---------------------AA---------------------------------T---A----C-------CT-…	ShiSon39	Esch1638	Escherichia/Shigella
>000006261|size:1536	0.0235883	96.6%:BifLon65;96.6%:BifLon64		CC-T-AC-G-G-G-A-G-GC--A-GCA-G-T-G-G-G-G-A-A--TA-TT--GC-A-C---AA-T-G-G--GC--GC-A-A--G-C--C-T-GA-T-G-C-A--GC-G--------A--C-GCC-G-C-G-T---------G-A-G--G--GA-T-G--G-A-G-G-CC----TT-CG-----------G-G-T--------T-G-T--A---AA-C-C-TC------------------------------TT-TT-A-T--C-GGG----G--A-G--C---AA--G-C-------------------------------G---------------------TG---------------------------------A-------------------…	BifLon65	BifLon64	Bifidobacterium longum subsp. Infantis
>000010818|size:1707	0.0234172	97.8%:StaAu564;97.8%:EntFa534		C--T-AC-G-G-G-A-G-GC--A-GCA-G-T-A-G-G-G-A-A--TC-TT--CG-G-C---AA-T-G-G--AC--GA-A-A--G-T--C-T-GA-C-C-G-A--GC-A--------A--C-GCC-G-C-G-T---------G-A-G--T--GA-A-G--A-A-G-G-TT----TT-CG-----------G-A-T--------C-G-T--A---AA-A-C-TC------------------------------TG-TT-G-T--T-AGA----G--A-A--G---AA-CAAG-G---A-C-G--T-T--A----------G--T---------------------AA---------------------------------C--------T-------GA-…	StaAu564	EntFa534	Enterococcus faecalis
>000009735|size:1019	0.0233848	95.1%:BcsFra39;95.1%:BcsFra38		CC-T-AC-G-G-G-A-G-GC--A-GCA-G-T-G-A-G-G-A-A--TA-TT--GG-T-C---AA-T-G-G--GC--GC-T-A--G-C--C-T-GA-C-C-C-A--GC-C--------A--A-GTA-G-C-G-T---------G-A-A--G--GA-T-G--A-A-G-G-CT-C--TA-TG-----------G-G-T--------C-G-T--A---AA-C-T-TC------------------------------TT-TT-A-T--A-TAA----G--A-A--T---AA-AGTG-C---A-G-T--A------------------T---------------------GT---------------------------------A-------------------…	BcsFra39	BcsFra38	Bacteroides fragilis
>000014657|size:889	0.0232128	98.0%:EnrCl527;98.0%:EnrCl526		CC-T-AC-G-G-G-A-G-GC--A-GCA-G-T-G-G-G-G-A-A--TA-TT--GC-A-C---AA-T-G-G--GC--GC-A-A--G-C--C-T-GA-T-G-C-A--GC-C--------A--T-GCC-G-C-G-T---------G-T-A--T--GA-A-G--A-A-G-G-CC----TT-CG-----------G-G-T--------T-G-T--A---AA-G-T-AC------------------------------TT-TC-A-G--C-GGG----G--A-G--G---AA--GGC-G---A-T-A--A-G--G----------T--T---------------------AA---------------------------------T---A----A-------CC-…	EnrCl527	EnrCl526	Enterobacter cloacae
>000007066|size:2224	0.0231055	96.7%:KleVar40;96.7%:KlePn961		CC-T-AC-G-G-G-A-G-GC--A-GCA-G-T-G-G-G-G-A-A--TA-TT--GC-A-C---AA-T-G-G--GC--GC-A-A--G-C--C-T-GA-T-G-C-A--GC-C--------A--T-GCC-G-C-G-T---------G-T-G--T--GA-A-G--A-A-G-G-CC----TT-CG-----------G-G-T--------T-G-T--A---AA-G-C-AC------------------------------TT-TC-A-G--C-GGG----G--A-G--G---AA--GGC-G---G-T-G--A-G--G----------T--T---------------------AA---------------------------------T---A----A-------CC-…	KleVar40	KlePn961	Klebsiella pneumoniae
>000007182|size:1726	0.0230428	96.7%:PntAn107;96.7%:PntAn106	Pantoea ananatis	CC-T-AC-G-G-G-A-G-GC--A-GCA-G-T-G-G-G-G-A-A--TA-TT--GC-A-C---AA-T-G-G--GC--GC-A-A--G-C--C-T-GA-T-G-C-A--GC-C--------A--T-GCC-G-C-G-T---------G-T-A--T--GA-A-G--A-A-G-G-CC----TT-CG-----------G-G-T--------T-G-T--A---AA-G-T-AC------------------------------TT-TC-A-G--C-GGG----G--A-G--G---AA--GGC-G---A-T-G--T-G--G----------T--T---------------------AA---------------------------------T---A----A-------CC-…	PntAn107	PntAn106	Pantoea ananatis
>000010811|size:1715	0.0230264	97.8%:StaAu564;97.8%:EntFa534		C--T-AC-G-G-G-A-G-GC--A-GCA-G-T-A-G-G-G-A-A--TC-TT--CG-G-C---AA-T-G-G--AC--GA-A-A--G-T--C-T-GA-C-C-G-A--GC-A--------A--C-GCC-G-C-G-T---------G-A-G--T--GA-A-G--A-A-G-G-TT----TT-CG-----------G-A-T--------C-G-T--A---AA-A-C-TC------------------------------TG-TT-G-T--T-AGA----G--A-A--G---AA-CAAG-G---A-C-G--T-T--A----------G--T---------------------AA---------------------------------C--------T-------GA-…	StaAu564	EntFa534	Enterococcus faecalis
>000009277|size:1674	0.0230048	95.1%:BcsFra39;95.1%:BcsFra38		CC-T-AC-G-G-G-A-G-GC--A-GCA-G-T-G-A-G-G-A-A--TA-TT--GG-T-C---AA-T-G-G--GC--GC-T-A--G-C--C-T-GA-C-C-C-A--GC-C--------A--A-GTA-G-C-G-T---------G-A-A--G--GA-T-G--A-A-G-G-CT-C--TA-TG-----------G-G-T--------C-G-T--A---AA-C-T-TC------------------------------TT-TT-A-T--A-TAA----G--A-A--T---AA-AGTG-C---A-G-T--A------------------T---------------------GT---------------------------------A-------------------…	BcsFra39	BcsFra38	Bacteroides fragilis
>000009922|size:1874	0.0229758	95.1%:PpcDi104;95.1%:PbdDis16		CC-T-AC-G-G-G-A-G-GC--A-GCA-G-T-G-A-G-G-A-A--TA-TT--GG-T-C---AA-T-G-G--CC--GA-G-A--G-G--C-T-GA-A-C-C-A--GC-C--------A--A-GTC-G-C-G-T---------G-A-G--G--GA-T-G--A-A-G-G-TT-C--TA-TG-----------G-A-T--------C-G-T--A---AA-C-C-TC------------------------------TT-TT-A-T--A-AGG----G--A-A--T---AA-AGTG-C---G-G-G--A------------------C---------------------GT---------------------------------G-------------------…	PpcDi104	PbdDis16	Parabacteroides distasonis
>000003771|size:1211	0.0229755	99.8%:NgvSucc3;97.1%:NgvSucc2		CC-T-AC-G-G-G-A-G-GC--A-GCA-G-T-G-G-G-G-A-A--TC-TT--CC-G-C---AA-T-G-G--AC--GA-A-A--G-T--C-T-GA-C-G-G-A--GC-A--------A--C-GCC-G-C-G-T---------G-A-G--T--GA-A-G--A-A-G-G-CC----TT-CG-----------G-G-T--------T-G-T--A---AA-G-C-TC------------------------------TG-TT-A-T--T-CGG----G--A-A--G---AA-CGAT-T---C-G-T--T-T--G----------T--A---------------------AA---------------------------------T---A----A-------TG-…	NgvSucc3	NgvSucc2	Negativicoccus succinicivorans
>000004913|size:1617	0.0228985	95.2%:StaEp124;95.2%:StaEp123		CC-T-AC-G-G-G-A-G-GC--A-GCA-G-T-A-G-G-G-A-A--TC-TT--CC-G-C---AA-T-G-G--GC--GA-A-A--G-C--C-T-GA-C-G-G-A--GC-A--------A--C-GCC-G-C-G-T---------G-A-G--T--GA-T-G--A-A-G-G-TC----TT-CG-----------G-A-T--------C-G-T--A---AA-A-C-TC------------------------------TG-TT-A-T--T-AGG----G--A-A--G---AA-CAAA-T---G-T-G--T-A--A----------G--T---------------------AA---------------------------------C--------T-------AT-…	StaEp124	StaEp123	Staphylococcus epidermidis
>000011710|size:1675	0.0228638	97.8%:C0PMass3;97.8%:C0PMass2	Actinobaculum massiliense	CC-T-AC-G-G-G-A-G-GC--A-GCA-G-T-G-G-G-G-G-A--TA-TT--GC-A-C---AA-T-G-G--GC--GC-A-A--G-C--C-T-GA-T-G-C-A--GC-G--------A--C-GCC-G-C-G-T---------G-A-G--G--GA-T-G--A-A-G-G-CT----TT-CG-----------G-G-T--------T-G-T--A---AA-C-C-TC------------------------------TT-TC-G-G--T-ACA----G--A-A--C---AA-GG-C-A---C-G-T-------------------------------------------TT---------------------------------T---T---------------…	C0PMass3	C0PMass2	Actinobaculum massiliense
>000006010|size:4517	0.0228199	95.4%:EscFer15;95.2%:ShiSon39		CC-T-AC-G-G-G-A-G-GC--A-GCA-G-T-G-G-G-G-A-A--TA-TT--GC-A-C---AA-T-G-G--GC--GC-A-A--G-C--C-T-GA-T-G-C-A--GC-C--------A--T-GCC-G-C-G-T---------G-T-A--T--GA-A-G--A-A-G-G-CC----TT-CG-----------G-G-T--------T-G-T--A---AA-G-T-AC------------------------------TT-TC-A-G--C-GGG----G--A-G--G---AA--GGG-A---G-T-A--A-A--G----------T--T---------------------AA---------------------------------T---A----C-------CT-…	EscFer15	ShiSon39	Enterococcus faecium
>000005807|size:1577	0.0227125	96.7%:KleOx209;96.7%:KleOx142		CC-T-AC-G-G-G-A-G-GC--A-GCA-G-T-G-G-G-G-A-A--TA-TT--GC-A-C---AA-T-G-G--GC--GC-A-A--G-C--C-T-GA-T-G-C-A--GC-C--------A--T-GCC-G-C-G-T---------G-T-A--T--GA-A-G--A-A-G-G-CC----TT-CG-----------G-G-T--------T-G-T--A---AA-G-T-AC------------------------------TT-TC-A-G--C-GGG----G--A-G--G---AA--GGG-A---G-T-A--A-G--G----------T--T---------------------AA---------------------------------T---A----A-------CC-…	KleOx209	KleOx142	Klebsiella oxytoca
>000004741|size:1279	0.0226077	97.8%:StaEpi99;97.8%:StaEpi80		CC-T-AC-G-G-G-A-G-GC--A-GCA-G-T-A-G-G-G-A-A--TC-TT--CC-G-C---AA-T-G-G--GC--GA-A-A--G-C--T-T-GA-C-G-G-A--GC-A--------A--C-GCC-G-C-G-T---------G-A-G--T--GA-T-G--A-A-G-G-TC----TT-CG-----------G-A-T--------C-G-T--A---AA-A-C-TC------------------------------TG-TT-A-T--T-AGG----G--A-A--G---AA-CAAA-T---G-T-G--T-A--A----------G--T---------------------AA---------------------------------C--------T-------AT-…	StaEpi99	StaEpi80	Staphylococcus epidermidis
>000002107|size:1650	0.0225225	95.4%:SttAng69;95.4%:SttAng68		CC-T-AC-G-G-G-A-G-GC--A-GCA-G-T-A-G-G-G-A-A--TC-TT--CG-G-C---AA-T-G-G--GG--GG-A-A--C-C--C-T-GA-C-C-G-A--GC-A--------A--C-GCC-G-C-G-T---------G-A-G--T--GA-A-G--A-A-G-G-TT----TT-CG-----------G-A-T--------C-G-T--A---AA-G-C-TC------------------------------TG-TT-G-T--T-AAG----G--A-A--G---AA-CGAG-T---G-T-G--A-G--A----------A--T---------------------GG---------------------------------A---A----A-------GT-…	SttAng69	SttAng68	Streptococcus anginosus
>000001749|size:1051	0.0224954	99.8%:BcsFra39;99.8%:BcsFra38		CC-T-AC-G-G-G-A-G-GC--A-GCA-G-T-G-A-G-G-A-A--TA-TT--GG-T-C---AA-T-G-G--GC--GC-T-A--G-C--C-T-GA-A-C-C-A--GC-C--------A--A-GTA-G-C-G-T---------G-A-A--G--GA-T-G--A-A-G-G-CT-C--TA-TG-----------G-G-T--------C-G-T--A---AA-C-T-TC------------------------------TT-TT-A-T--A-TAA----G--A-A--T---AA-AGTG-C---A-G-T--A------------------T---------------------GT---------------------------------A-------------------…	BcsFra39	BcsFra38	Bacteroides fragilis
>000015959|size:1871	0.0224551	97.1%:KleOx153;97.1%:KleOx103		CC-T-AC-G-G-G-A-G-GC--A-GCA-G-T-G-G-G-G-A-A--TA-TT--GC-A-C---AA-T-G-G--GC--GC-A-A--G-C--C-T-GA-T-G-C-A--GC-C--------A--T-GCC-G-C-G-T---------G-T-A--T--GA-A-G--A-A-G-G-CC----TT-CG-----------G-G-T--------T-G-T--A---AA-G-T-AC------------------------------TT-TC-A-G--C-GGG----G--A-G--G---AA--GGG-A---G-T-A--A-G--G----------T--T---------------------AA---------------------------------T---A----A-------CC-…	KleOx153	KleOx103	Klebsiella oxytoca
>000013167|size:1088	0.0222756	94.1%:EnrCl498;94.1%:EnrCl489		CC-T-AC-G-G-G-A-G-GC--A-GCA-G-T-G-G-G-G-A-A--TA-TT--GC-A-C---AA-T-G-G--GC--GC-A-A--G-C--C-T-GA-T-G-C-A--GC-C--------A--T-GCC-G-C-G-T---------G-T-A--T--GA-A-G--A-A-G-G-CC----TT-CG-----------G-G-T--------T-G-T--A---AA-G-T-AC------------------------------TT-TC-A-G--C-GGG----G--A-G--G---AA--GGC-G---A-C-A--G-G--G----------T--T---------------------AA---------------------------------T---A----A-------CC-…	EnrCl498	EnrCl489	Enterobacter cloacae
>000002176|size:531	0.0221557	94.5%:CrvLanc2;94.5%:CrvLance		CC-T-AC-G-G-G-A-G-GC--A-GCA-G-T-G-G-G-G-A-A--TT-TT--GG-A-C---AA-T-G-G--GC--GA-A-A--G-C--C-T-GA-T-C-C-A--GC-C--------A--T-GCC-G-C-G-T---------G-C-A--G--GA-T-G--A-A-G-G-CC----TT-CG-----------G-G-T--------T-G-T--A---AA-C-T-GC------------------------------TT-TT-G-T--A-CGG----A--A-C--G---AA--AAG-G---T-T-T--G-G--C----------C--T---------------------AA---------------------------------T---A----A-------GC-…	CrvLanc2	CrvLance	Curvibacter lanceolatus
>000009271|size:2131	0.0221435	97.8%:BcsFra39;97.8%:BcsFra38		CC-T-AC-G-G-G-A-G-GC--A-GCA-G-T-G-A-G-G-A-A--TA-TT--GG-T-C---AA-T-G-G--GC--GC-T-A--G-C--C-T-GA-A-C-C-A--GC-C--------A--A-GTA-G-C-G-T---------G-A-A--G--GA-T-G--A-A-G-G-CT-C--TA-TG-----------G-G-T--------C-G-T--A---AA-C-T-TC------------------------------TT-TT-A-T--A-TAA----G--A-A--T---AA-AGTG-C---A-G-T--A------------------T---------------------GT---------------------------------A-------------------…	BcsFra39	BcsFra38	Bacteroides fragilis
>000007148|size:1599	0.0221007	97.1%:BcsVul15;97.1%:BcsVul14		CC-T-AC-G-G-G-A-G-GC--A-GCA-G-T-G-A-G-G-A-A--TA-TT--GG-T-C---AA-T-G-G--GT--GA-G-A--G-C--C-T-GA-A-C-C-A--GC-C--------A--A-GTA-G-C-G-T---------G-A-A--G--GA-T-G--A-C-T-G-CC-C--TA-TG-----------G-G-T--------T-G-T--A---AA-C-T-TC------------------------------TT-TT-A-T--A-AAG----G--A-A--T---AA-AGTC-G---G-G-T--A------------------T---------------------GG---------------------------------A-------------------…	BcsVul15	BcsVul14	Bacteroides vulgatus
>000012688|size:2755	0.0220662	95.8%:EscFer15;95.2%:ShiSon39		CC-T-AC-G-G-G-A-G-GC--A-GCA-G-T-G-G-G-G-A-A--TA-TT--GC-A-C---AA-T-G-G--GC--GC-A-A--G-C--C-T-GA-T-G-C-A--GC-C--------A--T-GCC-G-C-G-T---------G-T-A--T--GA-A-G--A-A-G-G-CC----TT-CG-----------G-G-T--------T-G-T--A---AA-G-T-AC------------------------------TT-TC-A-G--C-GGG----G--A-G--G---AA--GGG-A---G-T-A--A-A--G----------T--T---------------------AA---------------------------------T---A----C-------CT-…	EscFer15	ShiSon39	Enterococcus faecium
>000015133|size:1398	0.0220521	97.8%:EnrCl527;97.8%:EnrCl526		CC-T-AC-G-G-G-A-G-GC--A-GCA-G-T-G-G-G-G-A-A--TA-TT--GC-A-C---AA-T-G-G--GC--GC-A-A--G-C--C-T-GA-T-G-C-A--GC-C--------A--T-GCC-G-C-G-T---------G-T-A--T--GA-A-G--A-A-G-G-CC----TT-CG-----------G-G-T--------T-G-T--A---AA-G-T-AC------------------------------TT-TC-A-G--C-GGG----G--A-G--G---AA--GGC-G---A-T-A--A-G--G----------T--T---------------------AA---------------------------------T---A----A-------CC-…	EnrCl527	EnrCl526	Enterobacter cloacae
>000001548|size:1425	0.0217332	97.0%:CorPse92;97.0%:CorPse91		CC-T-AC-G-G-G-A-G-GC--A-GCA-G-T-G-G-G-G-A-A--TA-TT--GC-A-C---AA-T-G-G--GC--GC-A-A--G-C--C-T-GA-T-G-C-A--GC-G--------A--C-GCC-G-C-G-T---------G-G-G--G--GA-T-G--A-C-G-G-CC----TT-CG-----------G-G-T--------T-G-T--A---AA-C-T-CC------------------------------TT-TC-G-C--T-AGG----G--A-C--G---AA--G-C-T-----------------------------T---------------------TT-----------------------------------------------------…	CorPse92	CorPse91	Corynebacterium tuberculostearicum
>000011615|size:1521	0.0216517	97.1%:CtbFr154;97.1%:CtbFr149		CC-T-AC-G-G-G-A-G-GC--A-GCA-G-T-G-G-G-G-A-A--TA-TT--GC-A-C---AA-T-G-G--GC--GC-A-A--G-C--C-T-GA-T-G-C-A--GC-C--------A--T-GCC-G-C-G-T---------G-T-A--T--GA-A-G--A-A-G-G-CC----TT-CG-----------G-G-T--------T-G-T--A---AA-G-T-AC------------------------------TT-TC-A-G--C-GAG----G--A-G--G---AA--GGC-A---T-T-A--A-G--G----------T--T---------------------AA---------------------------------T---A----A-------CC-…	CtbFr154	CtbFr149	Citrobacter freundii
>000007041|size:2512	0.0216299	99.8%:EnrAsb91;99.8%:EnrCl188		CC-T-AC-G-G-G-A-G-GC--A-GCA-G-T-G-G-G-G-A-A--TA-TT--GC-A-C---AA-T-G-G--GC--GC-A-A--G-C--C-T-GA-T-G-C-A--GC-C--------A--T-GCC-G-C-G-T---------G-T-A--T--GA-A-G--A-A-G-G-CC----TT-CG-----------G-G-T--------T-G-T--A---AA-G-T-AC------------------------------TT-TC-A-G--C-GGG----G--A-G--G---AA--GGC-G---G-T-G--A-G--G----------T--T---------------------AA---------------------------------T---A----A-------CC-…	EnrAsb91	EnrCl188	Enterobacter cloacae
>000010797|size:598	0.0214893	96.0%:StaAu564;96.0%:EntFa534		C--C-TC-G-G-G-A-G-GC--A-GCA-G-T-A-G-G-G-A-A--TC-TT--CG-G-C---AA-T-G-G--AC--GA-A-A--G-T--C-T-GA-C-C-G-A--GC-A--------A--C-GCC-G-C-G-T---------G-A-G--T--GA-A-G--A-A-G-G-TT----TT-CG-----------G-A-T--------C-G-T--A---AA-A-C-TC------------------------------TG-TT-G-T--T-AGA----G--A-A--G---AA-CAAG-G---A-C-G--T-T--A----------G--T---------------------AA---------------------------------C--------T-------GA-…	StaAu564	EntFa534	Enterococcus faecalis
>000006134|size:1976	0.0214101	96.7%:KleOx208;96.7%:KleOx207		CC-T-AC-G-G-G-A-G-GC--A-GCA-G-T-G-G-G-G-A-A--TA-TT--GC-A-C---AA-T-G-G--GC--GC-A-A--G-C--C-T-GA-T-G-C-A--GC-C--------A--T-GCC-G-C-G-T---------G-T-A--T--GA-A-G--A-A-G-G-CC----TT-CG-----------G-G-T--------T-G-T--A---AA-G-T-AC------------------------------TT-TC-A-G--C-GGG----G--A-G--G---AA--GGG-A---G-T-G--A-G--G----------T--T---------------------AA---------------------------------T---A----A-------CC-…	KleOx208	KleOx207	Klebsiella oxytoca
>000014671|size:1206	0.021296	96.7%:KleP1010;96.7%:KleVar41		CC-T-AC-G-G-G-A-G-GC--A-GCA-G-T-G-G-G-G-A-A--TA-TT--GC-A-C---AA-T-G-G--GC--GC-A-A--G-C--C-T-GA-T-G-C-A--GC-C--------A--T-GCC-G-C-G-T---------G-T-G--T--GA-A-G--A-A-G-G-CC----TT-CG-----------G-G-T--------T-G-T--A---AA-G-C-AC------------------------------TT-TC-A-G--C-GGG----G--A-G--G---AA--GGC-G---A-T-A--A-G--G----------T--T---------------------AA---------------------------------T---A----A-------CC-…	KleP1010	KleVar41	Klebsiella pneumoniae
>000004320|size:1742	0.0211763	97.8%:BcsThe20;97.8%:BcsThe16	Bacteroides thetaiotaomicron	CC-T-AC-G-G-G-A-G-GC--A-GCA-G-T-G-A-G-G-A-A--TA-TT--GG-T-C---AA-T-G-G--GC--GC-A-G--G-C--C-T-GA-A-C-C-A--GC-C--------A--A-GTA-G-C-G-T---------G-A-A--G--GA-T-G--A-C-T-G-CC-C--TA-TG-----------G-G-T--------T-G-T--A---AA-C-T-TC------------------------------TT-TT-A-T--A-TGG----G--A-A--T---AA-AGTT-T---T-C-C--A------------------C---------------------GT---------------------------------G-------------------…	BcsThe20	BcsThe16	Bacteroides thetaiotaomicron
>000003559|size:1849	0.0209634	94.1%:VeiSpe42;94.1%:VeiPar12	Veillonella parvula	CC-T-AC-G-G-G-A-G-GC--A-GCA-G-T-G-G-G-G-A-A--TC-TT--CC-G-C---AA-T-G-G--AC--GA-A-A--G-T--C-T-GA-C-G-G-A--GC-A--------A--C-GCC-G-C-G-T---------G-A-G--T--GA-T-G--A-C-G-G-CC----TT-CG-----------G-G-T--------T-G-T--A---AA-G-C-TC------------------------------TG-TT-A-A--T-CGG----G--A-C--G---AA-AGGC-C---T-T-C--T-T--G----------C--G---------------------AA---------------------------------C---A----G-------TT-…	VeiSpe42	VeiPar12	Veillonella parvula
>000012771|size:1246	0.0208958	97.8%:KleOx208;97.8%:KleOx207		CC-T-AC-G-G-G-A-G-GC--A-GCA-G-T-G-G-G-G-A-A--TA-TT--GC-A-C---AA-T-G-G--GC--GC-A-A--G-C--C-T-GA-T-G-C-A--GC-C--------A--T-GCC-G-C-G-T---------G-T-A--T--GA-A-G--A-A-G-G-CC----TT-CG-----------G-G-T--------T-G-T--A---AA-G-T-AC------------------------------TT-TC-A-G--C-GGG----G--A-G--G---AA--GGG-A---G-T-G--A-G--G----------T--T---------------------AA---------------------------------T---A----A-------CC-…	KleOx208	KleOx207	Klebsiella oxytoca
>000009106|size:1153	0.0208412	96.5%:ClsSpo18;96.5%:ClsSpo17	Clostridium sporogenes	CC-T-AC-G-G-G-A-G-GC--A-GCA-G-T-G-G-G-G-A-A--TA-TT--GC-G-C---AA-T-G-G--GG--GA-A-A--C-C--C-T-GA-C-G-C-A--GC-A--------A--C-GCC-G-C-G-T---------G-G-G--T--GA-T-G--A-A-G-G-TC----TT-CG-----------G-A-T--------T-G-T--A---AA-G-C-CC------------------------------TG-TT-T-T--C-TGG----G--A-C--G---A-------------------------------------T---------------------AA-----------------------------------------------------…	ClsSpo18	ClsSpo17	Clostridium sporogenes
>000004049|size:1402	0.0206933	96.7%:LacGas25;96.7%:LacGas24		CC-T-AC-G-G-G-A-G-GC--A-GCA-G-T-A-G-G-G-A-A--TC-TT--CC-A-C---AA-T-G-G--AC--GC-A-A--G-T--C-T-GA-T-G-G-A--GC-A--------A--C-GCC-G-C-G-T---------G-A-G--T--GA-A-G--A-A-G-G-GT----TT-CG-----------G-C-T--------C-G-T--A---AA-G-C-TC------------------------------TG-TT-G-G--T-AGT----G--A-A--G---AA-AGAT-A---G-A-G--G-T--A----------G--T---------------------AA---------------------------------C--------T-------GG-…	LacGas25	LacGas24	Lactobacillus gasseri
>000013026|size:1812	0.0206887	94.1%:EnrCl498;94.1%:EnrCl489		CC-T-AC-G-G-G-A-G-GC--A-GCA-G-T-G-G-G-G-A-A--TA-TT--GC-A-C---AA-T-G-G--GC--GC-A-A--G-C--C-T-GA-T-G-C-A--GC-C--------A--T-GCC-G-C-G-T---------G-T-A--T--GA-A-G--A-A-G-G-CC----TT-CG-----------G-G-T--------T-G-T--A---AA-G-T-AC------------------------------TT-TC-A-G--C-GGG----G--A-G--G---AA--GGC-G---A-C-A--G-G--G----------T--T---------------------AA---------------------------------T---A----A-------CC-…	EnrCl498	EnrCl489	Enterobacter cloacae
>000009053|size:862	0.0205887	96.5%:EubRect9;96.5%:EubRect8	[Eubacterium] rectale	CC-T-AC-G-G-G-A-G-GC--A-GCA-G-T-G-G-G-G-A-A--TA-TT--GC-A-C---AA-T-G-G--GC--GA-A-A--G-C--C-T-GA-T-G-C-A--GC-G--------A--C-GCC-G-C-G-T---------G-A-G--C--GA-A-G--A-A-G-T-AT----TT-CG-----------G-T-A--------T-G-T--A---AA-G-C-TC------------------------------TA-TC-A-G--C-AGG----G--A-A--G---A-------------------------------------T---------------------AA-----------------------------------------------------…	EubRect9	EubRect8	[Eubacterium] rectale
>000008660|size:1018	0.0203078	88.2%:FaePrau5;77.7%:GegFormi	Faecalibacterium prausnitzii	CC-T-AC-G-G-G-A-G-GC--A-GCA-G-T-G-G-G-G-G-A--TA-TT--GC-A-C---AA-T-G-G--GG--GA-A-A--C-C--C-T-GA-T-G-C-A--GC-G--------A--C-GCC-G-C-G-T---------G-G-A--G--GA-A-G--A-A-G-G-TT----TT-CG-----------G-A-T--------T-G-T--A---AA-C-T-CC------------------------------TG-TC-G-T--T-AGG----G--A-C--G---A-------------------------------------T---------------------AA-----------------------------------------------------…	FaePrau5	GegFormi	Faecalibacterium prausnitzii
>000013478|size:1351	0.0201494	96.9%:KleOxy31;96.7%:KleOx242		CC-T-AC-G-G-G-A-G-GC--A-GCA-G-T-G-G-G-G-A-A--TA-TT--GC-A-C---AA-T-G-G--GC--GC-A-A--G-C--C-T-GA-T-G-C-A--GC-C--------A--T-GCC-G-C-G-T---------G-T-A--T--GA-A-G--A-A-G-G-CC----TT-CG-----------G-G-T--------T-G-T--A---AA-G-T-AC------------------------------TT-TC-A-G--C-GGG----G--A-G--G---AA--GGC-G---A-T-A--A-G--G----------T--T---------------------AA---------------------------------T---A----A-------CC-…	KleOxy31	KleOx242	Klebsiella oxytoca
>000010960|size:899	0.0201482	96.7%:EnrCl486;96.7%:EnrCl470		CC-T-AC-G-G-G-A-G-GC--A-GCA-G-T-G-G-G-G-A-A--TA-TT--GC-A-C---AA-T-G-G--GC--GC-A-A--G-C--C-T-GA-T-G-C-A--GC-C--------A--T-GCC-G-C-G-T---------G-T-A--T--GA-A-G--A-A-G-G-CC----TT-CG-----------G-G-T--------T-G-T--A---AA-G-T-AC------------------------------TT-TC-A-G--C-GGG----G--A-G--G---AA--GGT-G---C-T-G--A-G--G----------T--T---------------------AA---------------------------------T---A----A-------CC-…	EnrCl486	EnrCl470	Enterobacter cloacae
>000004488|size:652	0.0196453	95.2%:VeiDisp6;95.2%:VeiDisp5		CC-T-AC-G-G-G-A-G-GC--A-GCA-G-T-G-G-G-G-A-A--TC-TT--CC-G-C---AA-T-G-G--AC--GA-A-A--G-T--C-T-GA-C-G-G-A--GC-A--------A--C-GCC-G-C-G-T---------G-A-G--T--GA-T-G--A-C-G-G-CC----TT-CG-----------G-G-T--------T-G-T--A---AA-G-C-TC------------------------------TG-TT-A-A--T-CGG----G--A-C--G---AA-AGGT-C---T-T-C--T-T--G----------C--G---------------------AA---------------------------------T---A----G-------TT-…	VeiDisp6	VeiDisp5	Veillonella dispar
>000013163|size:1488	0.0195364	94.1%:EnrCl498;94.1%:EnrCl489		CC-T-AC-G-G-G-A-G-GC--A-GCA-G-T-G-G-G-G-A-A--TA-TT--GC-A-C---AA-T-G-G--GC--GC-A-A--G-C--C-T-GA-T-G-C-A--GC-C--------A--T-GCC-G-C-G-T---------G-T-A--T--GA-A-G--A-A-G-G-CC----TT-CG-----------G-G-T--------T-G-T--A---AA-G-T-AC------------------------------TT-TC-A-G--C-GGG----G--A-G--G---AA--GGC-G---A-C-A--G-G--G----------T--T---------------------AA---------------------------------T---A----A-------CC-…	EnrCl498	EnrCl489	Enterobacter cloacae
>000010692|size:113	0.01942	95.2%:StaAu564;95.2%:EntFa534		C--T-AC-G-G-T-A-G-GC--A-GCA-G-T-A-G-G-G-A-A--TC-TT--CG-G-C---AA-T-G-G--AC--GA-A-A--G-T--C-T-GA-C-C-G-A--GC-A--------A--C-GCC-G-C-G-T---------G-A-G--T--GA-A-G--A-A-G-G-TT----TT-CG-----------G-A-T--------C-G-T--A---AA-A-C-TC------------------------------TG-TT-G-T--T-AGA----G--A-A--G---AA-CAAG-G---A-C-G--T-T--A----------G--T---------------------AA---------------------------------C--------T-------GA-…	StaAu564	EntFa534	Enterococcus faecalis
>000008051|size:1443	0.0192965	99.8%:ClsPer92;99.8%:ClsPer91		CC-T-AC-G-G-G-A-G-GC--A-GCA-G-T-G-G-G-G-A-A--TA-TT--GC-A-C---AA-T-G-G--GG--GA-A-A--C-C--C-T-GA-T-G-C-A--GC-A--------A--C-GCC-G-C-G-T---------G-A-G--T--GA-T-G--A-A-G-G-TT----TT-CG-----------G-A-T--------C-G-T--A---AA-G-C-TC------------------------------TG-TC-T-T--T-GGG----G--A-A--G---A-------------------------------------T---------------------AA-----------------------------------------------------…	ClsPer92	ClsPer91	Clostridium perfringens
>000010668|size:1222	0.0192548	96.7%:EntFa540;96.7%:EntFa539		CC-T-AC-G-G-G-A-G-GC--A-GCA-G-T-A-G-G-G-A-A--TC-TT--CG-G-C---AA-T-G-G--AC--GA-A-A--G-T--C-T-GA-C-C-G-A--GC-A--------A--C-GCC-G-C-G-T---------G-A-G--T--GA-A-G--A-A-G-G-TT----TT-CG-----------G-A-T--------C-G-T--A---AA-A-C-TC------------------------------TG-TT-G-T--T-AGA----G--A-A--G---AA-CAAG-G---A-T-G--A-G--A----------G--T---------------------AA---------------------------------C--------T-------GT-…	EntFa540	EntFa539	Enterococcus faecium
>000001989|size:1094	0.0191838	94.1%:AciGui12;94.1%:AciGui11		CC-T-AC-G-G-G-A-G-GC--A-GCA-G-T-G-G-G-G-A-A--TA-TT--GG-A-C---AA-T-G-G--GG--GG-A-A--C-C--C-T-GA-T-C-C-A--GC-C--------A--T-GCC-G-C-G-T---------G-T-G--T--GA-A-G--A-A-G-G-CC----TT-AT-----------G-G-T--------T-G-T--A---AA-G-C-AC------------------------------TT-TC-A-G--C-GAG----G--A-G--G---AG--GCT-C---T-C-T--T-G--G----------T--T---------------------AA---------------------------------T---A----C-------CC-…	AciGui12	AciGui11	Acinetobacter guillouiae/iwoffii
>000012950|size:1315	0.019144	97.1%:KleP1010;97.1%:KleVar41		CC-T-AC-G-G-G-A-G-GC--A-GCA-G-T-G-G-G-G-A-A--TA-TT--GC-A-C---AA-T-G-G--GC--GC-A-A--G-C--C-T-GA-T-G-C-A--GC-C--------A--T-GCC-G-C-G-T---------G-T-G--T--GA-A-G--A-A-G-G-CC----TT-CG-----------G-G-T--------T-G-T--A---AA-G-C-AC------------------------------TT-TC-A-G--C-GGG----G--A-G--G---AA--GGC-G---A-T-A--A-G--G----------T--T---------------------AA---------------------------------T---A----A-------CC-…	KleP1010	KleVar41	Klebsiella pneumoniae
>000010769|size:556	0.0190789	96.7%:StaAu564;96.7%:EntFa534		C--T-AC-G-G-G-A-G-GC--A-GCA-G-T-A-G-G-G-A-A--TC-TT--CG-G-C---AA-T-G-G--AC--GA-A-A--G-T--C-T-GA-C-C-G-A--GC-A--------A--C-GCC-G-C-G-T---------G-A-G--T--GA-A-G--A-A-G-G-TT----TT-CG-----------G-A-T--------C-G-T--A---AA-A-C-TC------------------------------TG-TT-G-T--T-AGA----G--A-A--G---AA-CAAG-G---A-C-G--T-T--A----------G--T---------------------AA---------------------------------C--------T-------GA-…	StaAu564	EntFa534	Enterococcus faecalis
>000007435|size:1563	0.019012	95.1%:BcsVul15;95.1%:BcsVul14		CC-T-AC-G-G-G-A-G-GC--A-GCA-G-T-G-A-G-G-A-A--TA-TT--GG-T-C---AA-T-G-G--GC--GA-G-A--G-C--C-T-GA-A-C-C-A--GC-C--------A--A-GTA-G-C-G-T---------G-A-A--G--GA-T-G--A-C-T-G-CC-C--TA-TG-----------G-G-T--------T-G-T--A---AA-C-T-TC------------------------------TT-TT-A-T--A-AAG----G--A-A--T---AA-AGTC-G---G-G-T--A------------------T---------------------GC---------------------------------A-------------------…	BcsVul15	BcsVul14	Bacteroides vulgatus
>000000877|size:1817	0.0189247	67.6%:CorXer22;67.6%:CorFre19	Corynebacterium kroppenstedtii	CC-T-AC-G-G-G-A-G-GC--A-GCA-G-T-G-G-G-G-A-A--TA-TT--GC-A-C---AA-T-G-G--GC--GC-A-A--G-C--C-T-GA-T-G-C-A--GC-G--------A--C-GCC-G-C-G-T---------G-G-G--G--GA-T-G--A-C-G-G-CC----TT-CG-----------G-G-T--------T-G-T--A---AA-C-T-CC------------------------------TT-TC-A-G--C-CAT----G--A-C--G---AA--GCC-----------------------------CTTT--------------------TG---------------------------------G-------------------…	CorXer22	CorFre19	Corynebacterium kroppenstedtii
>000007062|size:921	0.0188783	96.7%:KleP1015;96.7%:KleP1009		CC-T-AC-G-G-G-A-G-GC--A-GCA-G-T-G-G-G-G-A-A--TA-TT--GC-A-C---AA-T-G-G--GC--GC-A-A--G-C--C-T-GA-T-G-C-A--GC-C--------A--T-GCC-G-C-G-T---------G-T-G--T--GA-A-G--A-A-G-G-CC----TT-CG-----------G-G-T--------T-G-T--A---AA-G-C-AC------------------------------TT-TC-A-G--C-GGG----G--A-G--G---AA--GGC-G---G-T-G--A-G--G----------T--T---------------------AA---------------------------------T---A----A-------CC-…	KleP1015	KleP1009	Klebsiella pneumoniae
>000011630|size:1369	0.0188441	96.7%:EnrAe160;96.7%:EnrAe144	Klebsiella aerogenes	CC-T-AC-G-G-G-A-G-GC--A-GCA-G-T-G-G-G-G-A-A--TA-TT--GC-A-C---AA-T-G-G--GC--GC-A-A--G-C--C-T-GA-T-G-C-A--GC-C--------A--T-GCC-G-C-G-T---------G-T-A--T--GA-A-G--A-A-G-G-CC----TT-CG-----------G-G-T--------T-G-T--A---AA-G-T-AC------------------------------TT-TC-A-G--C-GAG----G--A-G--G---AA--GGC-A---T-T-A--A-G--G----------T--T---------------------AA---------------------------------T---A----A-------CC-…	EnrAe160	EnrAe144	Klebsiella aerogenes
>000013257|size:1545	0.01865	97.8%:EnrCl527;97.8%:EnrCl526		CC-T-AC-G-G-G-A-G-GC--A-GCA-G-T-G-G-G-G-A-A--TA-TT--GC-A-C---AA-T-G-G--GC--GC-A-A--G-C--C-T-GA-T-G-C-A--GC-C--------A--T-GCC-G-C-G-T---------G-T-A--T--GA-A-G--A-A-G-G-CC----TT-CG-----------G-G-T--------T-G-T--A---AA-G-T-AC------------------------------TT-TC-A-G--C-GGG----G--A-G--G---AA--GGC-G---A-T-A--A-G--G----------T--T---------------------AA---------------------------------T---A----A-------CC-…	EnrCl527	EnrCl526	Enterobacter cloacae
>000004770|size:1202	0.0184422	99.8%:StaEp122;99.8%:StaCap17		CC-T-AC-G-G-G-A-G-GC--A-GCA-G-T-A-G-G-G-A-A--TC-TT--CC-G-C---AA-T-G-G--GC--GA-A-A--G-C--C-T-GA-C-G-G-A--GC-A--------A--C-GCC-G-C-G-T---------G-A-G--T--GA-A-G--A-A-G-G-TC----TT-CG-----------G-A-T--------C-G-T--A---AA-A-C-TC------------------------------TG-TT-A-T--T-AGG----G--A-A--G---AA-CAAA-T---G-T-G--T-A--A----------G--T---------------------AA---------------------------------C--------T-------AT-…	StaEp122	StaCap17	Staphylococcus epidermidis
>000002163|size:1085	0.0183423	97.8%:UndOligo;91.2%:BacPH120		CC-T-AC-G-G-G-A-G-GC--A-GCA-G-T-G-G-G-G-A-A--TT-TT--GG-A-C---AA-T-G-G--GG--GC-A-A--C-C--C-T-GA-T-C-C-A--GC-A--------A--T-GCC-G-C-G-T---------G-A-G--T--GA-A-G--A-A-G-G-CC----CT-CG-----------G-G-T--------T-G-T--A---AA-G-C-TC------------------------------TT-TT-G-T--C-AGG----G--A-A--G---AA--ACG-G---A-G-T--T-C--T----------C--T---------------------AA---------------------------------T---A----T-------AG-…	UndOligo	BacPH120	Undibacterium oligocarboniphilum
>000007655|size:1121	0.018216	97.8%:KlePn623;95.2%:KlePn770		CC-T-AC-G-G-G-A-G-GC--A-GCA-G-T-G-G-G-G-A-A--TA-TT--GC-A-C---AA-T-G-G--GC--GC-A-A--G-C--C-T-GA-T-G-C-A--GC-C--------A--T-GCC-G-C-G-T---------G-T-G--T--GA-A-G--A-A-G-G-CC----TT-CG-----------G-G-T--------T-G-T--A---AA-G-C-AC------------------------------TT-TC-A-G--C-GGG----G--A-G--G---AA--GGC-G---C-C-A--A-G--G----------T--T---------------------AA---------------------------------T---A----A-------CC-…	KlePn623	KlePn770	Klebsiella pneumoniae
>000009690|size:628	0.0182058	97.1%:BcsFra39;97.1%:BcsFra38		CC-T-AC-G-G-G-A-G-GC--A-GCA-G-T-G-A-G-G-A-A--TA-TT--GG-T-C---AA-T-G-G--GC--GC-T-A--G-C--C-T-GA-A-C-C-A--GC-C--------A--A-GTA-G-C-G-T---------G-A-A--G--GA-T-G--A-A-G-G-CT-C--TA-TG-----------G-G-T--------C-G-T--A---AA-C-T-TC------------------------------TT-TT-A-T--A-TAA----G--A-A--T---AA-AGTG-C---A-G-T--A------------------T---------------------GT---------------------------------A-------------------…	BcsFra39	BcsFra38	Bacteroides fragilis
>000011276|size:986	0.0182034	91.7%:AcyRadin;65.6%:AcySuim2		CC-T-AC-G-G-G-A-G-GC--A-GCA-G-T-G-G-G-G-A-A--TT-TT--GC-A-C---AA-T-G-G--GG--GG-A-A--C-C--T-T-GA-T-G-C-A--GC-G--------A--C-GCC-G-C-G-T---------G-A-G--G--GA-T-G--G-A-G-G-CC----TT-CG-----------G-G-T--------T-G-T--G---AA-C-C-TC------------------------------TT-TC-G-C--T-CGT----G--T-G--C---AA--GCC-G---C-T-A--T-T---------------------------------------T---------------------------------G-----------------G-…	AcyRadin	AcySuim2	Actinomyces radingae
>000007920|size:524	0.0181797	97.7%:FinMag11;97.7%:FinMag10		CC-T-AC-G-G-G-A-G-GC--A-GCA-G-T-G-G-G-G-A-A--TA-TT--GC-A-C---AA-T-G-G--GG--GA-A-A--C-C--C-T-GA-T-G-C-A--GC-G--------A--C-GCC-G-C-G-T---------G-A-A--C--GA-A-G--A-A-G-G-TA----TT-CG-----------T-A-T--------C-G-T--A---AA-G-T-TC------------------------------TG-TC-C-T--A-TGG----G--A-A--G---A-------------------------------------T---------------------AA-----------------------------------------------------…	FinMag11	FinMag10	Finegoldia magna
>000011078|size:1517	0.0181627	97.1%:StaAu565;97.1%:StaAu563		CC-T-AC-G-G-G-A-G-GC--A-GCA-G-T-A-G-G-G-A-A--TC-TT--CC-G-C---AA-T-G-G--GC--GA-A-A--G-C--C-T-GA-C-G-G-A--GC-A--------A--C-GCC-G-C-G-T---------G-A-G--T--GA-T-G--A-A-G-G-TC----TT-CG-----------G-A-T--------C-G-T--A---AA-A-C-TC------------------------------TG-TT-A-T--T-AGG----G--A-A--G---AA-CATA-T---G-T-G--T-A--A----------G--T---------------------AA---------------------------------C--------T-------GT-…	StaAu565	StaAu563	Staphylococcus aureus
>000014735|size:1053	0.0179363	96.7%:KleP1010;96.7%:KleVar41		CC-T-AC-G-G-G-A-G-GC--A-GCA-G-T-G-G-G-G-A-A--TA-TT--GC-A-C---AA-T-G-G--GC--GC-A-A--G-C--C-T-GA-T-G-C-A--GC-C--------A--T-GCC-G-C-G-T---------G-T-G--T--GA-A-G--A-A-G-G-CC----TT-CG-----------G-G-T--------T-G-T--A---AA-G-C-AC------------------------------TT-TC-A-G--C-GGG----G--A-G--G---AA--GGC-G---A-T-A--A-G--G----------T--T---------------------AA---------------------------------T---A----A-------CC-…	KleP1010	KleVar41	Klebsiella pneumoniae
>000009054|size:648	0.0176755	96.5%:EubRect9;96.5%:EubRect8		CC-T-AC-G-G-G-A-G-GC--A-GCA-G-T-G-G-G-G-A-A--TA-TT--GC-A-C---AA-T-G-G--GC--GA-A-A--G-C--C-T-GA-T-G-C-A--GC-G--------A--C-GCC-G-C-G-T---------G-A-G--C--GA-A-G--A-A-G-T-AT----TT-CG-----------G-T-A--------T-G-T--A---AA-G-C-TC------------------------------TA-TC-A-G--C-AGG----G--A-A--G---A-------------------------------------T---------------------AA-----------------------------------------------------…	EubRect9	EubRect8	[Eubacterium] rectale
>000011976|size:1091	0.0175869	96.7%:NgvSucc3;94.1%:NgvSucc2	Negativicoccus succinicivorans	CC-T-AC-G-G-G-A-G-GC--A-GCA-G-T-G-G-G-G-A-A--TC-TT--CC-G-C---AA-T-G-G--AC--GA-A-A--G-T--C-T-GA-C-G-G-A--GC-A--------A--C-GCC-G-C-G-T---------G-A-G--T--GA-A-G--A-A-G-G-CC----TT-CG-----------G-G-T--------T-G-T--A---AA-G-C-TC------------------------------TG-TT-A-T--T-CGG----G--A-A--G---AA-CGAT-T---C-G-T--T-T--G----------T--A---------------------AA---------------------------------T---A----A-------TG-…	NgvSucc3	NgvSucc2	Negativicoccus succinicivorans
>000000874|size:749	0.0175592	96.6%:CorStr21;96.6%:CorStr19	Corynebacterium striatum	CC-T-AC-G-G-G-A-G-GC--A-GCA-G-T-G-G-G-G-A-A--TA-TT--GC-A-C---AA-T-G-G--GC--GG-A-A--G-C--C-T-GA-T-G-C-A--GC-G--------A--C-GCC-G-C-G-T---------G-G-G--G--GA-T-G--A-A-G-G-CC----TT-CG-----------G-G-T--------T-G-T--A---AA-C-T-CC------------------------------TT-TC-G-A--C-AGG----G--A-C--G---AA--G-C-------------------------------G---------------------TA---------------------------------A-------------------…	CorStr21	CorStr19	Corynebacterium striatum
>000004927|size:37723	0.0175241	94.1%:StaEp124;94.1%:StaEp123	Staphylococcus epidermidis	CC-T-AC-G-G-G-A-G-GC--A-GCA-G-T-A-G-G-G-A-A--TC-TT--CC-G-C---AA-T-G-G--GC--GA-A-A--G-C--C-T-GA-C-G-G-A--GC-A--------A--C-GCC-G-C-G-T---------G-A-G--T--GA-T-G--A-A-G-G-TC----TT-CG-----------G-A-T--------C-G-T--A---AA-A-C-TC------------------------------TG-TT-A-T--T-AGG----G--A-A--G---AA-CAAA-T---G-T-G--T-A--A----------G--T---------------------AA---------------------------------C--------T-------AT-…	StaEp124	StaEp123	Staphylococcus epidermidis
>000001546|size:761	0.0174961	95.2%:CorPse92;95.2%:CorPse91		CC-T-AC-G-G-G-A-G-GC--A-GCA-G-T-G-G-G-G-A-A--TA-TT--GC-A-C---AA-T-G-G--GC--GC-A-A--G-C--C-T-GA-T-G-C-A--GC-G--------A--C-GCC-G-C-G-T---------G-G-G--G--GA-T-G--A-C-G-G-CC----TT-CG-----------G-G-T--------T-G-T--A---AA-C-T-CC------------------------------TT-TC-G-C--T-AGG----G--A-C--G---AA--G-C-T-----------------------------T---------------------TT-----------------------------------------------------…	CorPse92	CorPse91	Corynebacterium tuberculostearicum
>000013103|size:1264	0.0174621	96.7%:EnrCl527;96.7%:EnrCl526		CC-T-AC-G-G-G-A-G-GC--A-GCA-G-T-G-G-G-G-A-A--TA-TT--GC-A-C---AA-T-G-G--GC--GC-A-A--G-C--C-T-GA-T-G-C-A--GC-C--------A--T-GCC-G-C-G-T---------G-T-A--T--GA-A-G--A-A-G-G-CC----TT-CG-----------G-G-T--------T-G-T--A---AA-G-T-AC------------------------------TT-TC-A-G--C-GGG----G--A-G--G---AA--GGC-G---A-T-A--A-G--G----------T--T---------------------AA---------------------------------T---A----A-------CC-…	EnrCl527	EnrCl526	Enterobacter cloacae
>000013010|size:510	0.0174135	95.4%:EnrCl498;95.4%:EnrCl489		CC-T-AC-G-G-G-A-G-GC--A-GCA-G-T-G-G-G-G-A-A--TA-TT--GC-A-C---AA-T-G-G--GC--GC-A-A--G-C--C-T-GA-T-G-C-A--GC-C--------A--T-GCC-G-C-G-T---------G-T-A--T--GA-A-G--A-A-G-G-CC----TT-CG-----------G-G-T--------T-G-T--A---AA-G-T-AC------------------------------TT-TC-A-G--C-GGG----G--A-G--G---AA--GGC-G---A-C-A--G-G--G----------T--T---------------------AA---------------------------------T---A----A-------CC-…	EnrCl498	EnrCl489	Enterobacter cloacae
>000015115|size:1475	0.0173474	96.7%:ShiSon39;96.7%:Esch1638		CC-T-AC-G-G-G-A-G-GC--A-GCA-G-T-G-G-G-G-A-A--TA-TT--GC-A-C---AA-T-G-G--GC--GC-A-A--G-C--C-T-GA-T-G-C-A--GC-C--------A--T-GCC-G-C-G-T---------G-T-A--T--GA-A-G--A-A-G-G-CC----TT-CG-----------G-G-T--------T-G-T--A---AA-G-T-AC------------------------------TT-TC-A-G--C-GGG----G--A-G--G---AA--GGG-A---G-T-A--A-A--G----------T--T---------------------AA---------------------------------T---A----C-------CT-…	ShiSon39	Esch1638	Escherichia/Shigella
>000001664|size:1326	0.0172106	97.8%:StaHom36;97.8%:StaHom35	Staphylococcus hominis	CC-T-AC-G-G-G-A-G-GC--A-GCA-G-T-A-G-G-G-A-A--TC-TT--CC-G-C---AA-T-G-G--GC--GA-A-A--G-C--C-T-GA-C-G-G-A--GC-A--------A--C-GCC-G-C-G-T---------G-A-G--T--GA-T-G--A-A-G-G-TC----TT-CG-----------G-A-T--------C-G-T--A---AA-A-C-TC------------------------------TG-TT-A-T--T-AGG----G--A-A--G---AA-CAAA-C---G-T-G--T-A--A----------G--T---------------------AA---------------------------------C--------T-------GT-…	StaHom36	StaHom35	Staphylococcus hominis
>000006137|size:933	0.0171956	98.0%:KleOx208;98.0%:KleOx207		CC-T-AC-G-G-G-A-G-GC--A-GCA-G-T-G-G-G-G-A-A--TA-TT--GC-A-C---AA-T-G-G--GC--GC-A-A--G-C--C-T-GA-T-G-C-A--GC-C--------A--T-GCC-G-C-G-T---------G-T-A--T--GA-A-G--A-A-G-G-CC----TT-CG-----------G-G-T--------T-G-T--A---AA-G-T-AC------------------------------TT-TC-A-G--C-GGG----G--A-G--G---AA--GGG-A---G-T-G--A-G--G----------T--T---------------------AA---------------------------------T---A----A-------CC-…	KleOx208	KleOx207	Klebsiella oxytoca
>000009938|size:1523	0.0170998	94.1%:AciGui12;94.1%:AciGui11		CC-T-AC-G-G-G-A-G-GC--A-GCA-G-T-G-G-G-G-A-A--TA-TT--GG-A-C---AA-T-G-G--GG--GG-A-A--C-C--C-T-GA-T-C-C-A--GC-C--------A--T-GCC-G-C-G-T---------G-T-G--T--GA-A-G--A-A-G-G-CC----TT-AT-----------G-G-T--------T-G-T--A---AA-G-C-AC------------------------------TT-TA-A-G--C-GAG----G--A-G--G---AG--GCT-C---T-C-T--T-G--G----------T--T---------------------AA---------------------------------T---A----C-------CC-…	AciGui12	AciGui11	Acinetobacter guillouiae/iwoffii
>000008039|size:980	0.0170908	95.1%:ClsPer81;94.9%:ClsPer92	Clostridium perfringens	CC-T-AC-G-G-G-A-G-GC--A-GCA-G-T-G-G-G-G-A-A--TA-TT--GC-A-C---AA-T-G-G--GG--GA-A-A--C-C--T-T-GA-T-G-C-A--GC-A--------A--C-GCC-G-C-G-T---------G-A-G--T--GA-T-G--A-A-G-G-TT----TT-CG-----------G-A-T--------C-G-T--A---AA-G-C-TC------------------------------TG-TC-T-T--T-GGG----G--A-A--G---A-------------------------------------T---------------------AA-----------------------------------------------------…	ClsPer81	ClsPer92	Clostridium perfringens
>000010519|size:684	0.0168738	96.7%:StaAu564;96.7%:EntFa534		C--T-AC-G-G-G-A-G-GC--A-GCA-G-T-A-G-G-G-A-A--TC-TT--CG-G-C---AA-T-G-G--AC--GA-A-A--G-T--C-T-GA-C-C-G-A--GC-A--------A--C-GCC-G-C-G-T---------G-A-G--T--GA-A-G--A-A-G-G-TT----TT-CG-----------G-A-T--------C-G-T--A---AA-A-C-TC------------------------------TG-TT-G-T--T-AGA----G--A-A--G---AA-CAAG-G---A-C-G--T-T--A----------G--T---------------------AA---------------------------------C--------T-------GA-…	StaAu564	EntFa534	Enterococcus faecalis
>000008668|size:689	0.0168203	88.2%:FaePrau5;77.7%:GegFormi		CC-T-AC-G-G-G-A-G-GC--A-GCA-G-T-G-G-G-G-G-A--TA-TT--GC-A-C---AA-T-G-G--GG--GA-A-A--C-C--C-T-GA-T-G-C-A--GC-G--------A--C-GCC-G-C-G-T---------G-G-A--G--GA-A-G--A-A-G-G-TT----TT-CG-----------G-A-T--------T-G-T--A---AA-C-T-CC------------------------------TG-TC-G-T--T-AGG----G--A-C--G---A-------------------------------------T---------------------AA-----------------------------------------------------…	FaePrau5	GegFormi	Faecalibacterium prausnitzii
>000013652|size:1057	0.0167738	96.7%:KleP1002;96.7%:KlePn925		CC-T-AC-G-G-G-A-G-GC--A-GCA-G-T-G-G-G-G-A-A--TA-TT--GC-A-C---AA-T-G-G--GC--GC-A-A--G-C--C-T-GA-T-G-C-A--GC-C--------A--T-GCC-G-C-G-T---------G-T-G--T--GA-A-G--A-A-G-G-CC----TT-CG-----------G-G-T--------T-G-T--A---AA-G-C-AC------------------------------TT-TC-A-G--C-GGG----G--A-G--G---AA--GGC-G---A-T-A--A-G--G----------T--T---------------------AA---------------------------------T---A----A-------CC-…	KleP1002	KlePn925	Klebsiella pneumoniae
>000013583|size:1473	0.0167626	98.0%:KlePn689;98.0%:KlePn687		CC-T-AC-G-G-G-A-G-GC--A-GCA-G-T-G-G-G-G-A-A--TA-TT--GC-A-C---AA-T-G-G--GC--GC-A-A--G-C--C-T-GA-T-G-C-A--GC-C--------A--T-GCC-G-C-G-T---------G-T-G--T--GA-A-G--A-A-G-G-CC----TT-CG-----------G-G-T--------T-G-T--A---AA-G-C-AC------------------------------TT-TC-A-G--C-GGG----G--A-G--G---AA--GGC-G---A-T-G--A-G--G----------T--T---------------------AA---------------------------------T---A----A-------CC-…	KlePn689	KlePn687	Klebsiella pneumoniae
>000010166|size:452	0.0166844	96.7%:SttThe44;96.7%:SttThe43	Streptococcus thermophilus	CC-T-AC-G-G-G-A-G-GC--A-GCA-G-T-A-G-G-G-A-A--TC-TT--CG-G-C---AA-T-G-G--GG--GC-A-A--C-C--C-T-GA-C-C-G-A--GC-A--------A--C-GCC-G-C-G-T---------G-A-G--T--GA-A-G--A-A-G-G-TT----TT-CG-----------G-A-T--------C-G-T--A---AA-G-C-TC------------------------------TG-TT-G-T--A-AGT----C--A-A--G---AA-CGGG-T---G-T-G--A-G--A----------G--T---------------------GG---------------------------------A---A----A-------GT-…	SttThe44	SttThe43	Streptococcus thermophilus
>000012441|size:1115	0.0166506	94.1%:StaEp124;94.1%:StaEp123		CC-T-AC-G-G-G-A-G-GC--A-GCA-G-T-A-G-G-G-A-A--TC-TT--CC-G-C---AA-T-G-G--GC--GA-A-A--G-C--C-T-GA-C-G-G-A--GC-A--------A--C-GCC-G-C-G-T---------G-A-G--T--GA-T-G--A-A-G-G-TC----TT-CG-----------G-A-T--------C-G-T--A---AA-A-C-TC------------------------------TG-TT-A-T--T-AGG----G--A-A--G---AA-CAAA-T---G-T-G--T-A--A----------G--T---------------------AA---------------------------------C--------T-------AT-…	StaEp124	StaEp123	Staphylococcus epidermidis
>000014554|size:1421	0.0165819	97.1%:ShiSon39;97.1%:Esch1638		CC-T-AC-G-G-G-A-G-GC--A-GCA-G-T-G-G-G-G-A-A--TA-TT--GC-A-C---AA-T-G-G--GC--GC-A-A--G-C--C-T-GA-T-G-C-A--GC-C--------A--T-GCC-G-C-G-T---------G-T-A--T--GA-A-G--A-A-G-G-CC----TT-CG-----------G-G-T--------T-G-T--A---AA-G-T-AC------------------------------TT-TC-A-G--C-GGG----G--A-G--G---AA--GGG-A---G-T-A--A-A--G----------T--T---------------------AA---------------------------------T---A----C-------CT-…	ShiSon39	Esch1638	Escherichia/Shigella
>000010582|size:1287	0.0162995	95.2%:StaAu564;95.2%:EntFa534		CC-T-AC-G-G-G-A-G-GC--A-GCA-G-T-A-G-G-G-A-A--TC-TT--CG-G-C---AA-T-G-G--AC--GA-A-A--G-T--C-T-GA-C-C-G-A--GC-A--------A--C-GCC-G-C-G-T---------G-A-G--T--GA-A-G--A-A-G-G-TT----TT-CG-----------G-A-T--------C-G-T--A---AA-A-C-TC------------------------------TG-TT-G-T--T-AGA----G--A-A--G---AA-CAAG-G---A-C-G--T-T--A----------G--T---------------------AA---------------------------------C--------T-------GA-…	StaAu564	EntFa534	Enterococcus faecalis
>000007562|size:478	0.0162925	97.8%:KleP1014;97.8%:KleP1012		CC-T-AC-G-G-G-A-G-GC--A-GCA-G-T-G-G-G-G-A-A--TA-TT--GC-A-C---AA-T-G-G--GC--GC-A-A--G-C--C-T-GA-T-G-C-A--GC-C--------A--T-GCC-G-C-G-T---------G-T-G--T--GA-A-G--A-A-G-G-CC----TT-CG-----------G-G-T--------T-G-T--A---AA-G-C-AC------------------------------TT-TC-A-G--C-GGG----G--A-G--G---AA--GGC-G---T-T-A--A-G--G----------T--T---------------------AA---------------------------------T---A----A-------CC-…	KleP1014	KleP1012	Klebsiella pneumoniae
>000014854|size:835	0.0162555	97.8%:EnrCl527;97.8%:EnrCl526		CC-T-AC-G-G-G-A-G-GC--A-GCA-G-T-G-G-G-G-A-A--TA-TT--GC-A-C---AA-T-G-G--GC--GC-A-A--G-C--C-T-GA-T-G-C-A--GC-C--------A--T-GCC-G-C-G-T---------G-T-A--T--GA-A-G--A-A-G-G-CC----TT-CG-----------G-G-T--------T-G-T--A---AA-G-T-AC------------------------------TT-TC-A-G--C-GGG----G--A-G--G---AA--GGC-G---A-T-A--A-G--G----------T--T---------------------AA---------------------------------T---A----A-------CC-…	EnrCl527	EnrCl526	Enterobacter cloacae
>000007241|size:1340	0.0161602	95.3%:BcsDor17;95.3%:BcsDor16		CC-T-AC-G-G-G-A-G-GC--A-GCA-G-T-G-A-G-G-A-A--TA-TT--GG-T-C---AA-T-G-G--GC--GA-T-G--G-C--C-T-GA-A-C-C-A--GC-C--------A--C-GTA-G-C-G-T---------G-A-A--G--GA-T-G--A-C-T-G-CC-C--TA-TG-----------G-G-T--------T-G-T--A---AA-C-T-TC------------------------------TT-TT-A-T--A-AAG----G--A-A--T---AA-AGTC-G---G-G-T--A------------------T---------------------GC---------------------------------A-------------------…	BcsDor17	BcsDor16	Bacteroides dorei
>000008037|size:1087	0.0160548	97.0%:ClsPer92;97.0%:ClsPer91		CC-T-AC-G-G-G-A-G-GC--A-GCA-G-T-G-G-G-G-A-A--TA-TT--GC-A-C---AA-T-G-G--GG--GA-A-A--C-C--C-T-GA-T-G-C-A--GC-A--------A--C-GCC-G-C-G-T---------G-A-G--T--GA-T-G--A-A-G-G-TT----TT-CG-----------G-A-T--------C-G-T--A---AA-G-C-TC------------------------------TG-TC-T-T--T-GGG----G--A-A--G---A-------------------------------------T---------------------AA-----------------------------------------------------…	ClsPer92	ClsPer91	Clostridium perfringens
>000013256|size:1062	0.0159726	97.8%:KleOx242;97.8%:KleOx241		CC-T-AC-G-G-G-A-G-GC--A-GCA-G-T-G-G-G-G-A-A--TA-TT--GC-A-C---AA-T-G-G--GC--GC-A-A--G-C--C-T-GA-T-G-C-A--GC-C--------A--T-GCC-G-C-G-T---------G-T-A--T--GA-A-G--A-A-G-G-CC----TT-CG-----------G-G-T--------T-G-T--A---AA-G-T-AC------------------------------TT-TC-A-G--C-GGG----G--A-G--G---AA--GGC-G---A-T-A--A-G--G----------T--T---------------------AA---------------------------------T---A----A-------CC-…	KleOx242	KleOx241	Klebsiella oxytoca
>000001661|size:1098	0.015959	97.8%:KlePn604;97.8%:StaLug16		CC-T-AC-G-G-G-A-G-GC--A-GCA-G-T-A-G-G-G-A-A--TC-TT--CC-G-C---AA-T-G-G--GC--GA-A-A--G-C--C-T-GA-C-G-G-A--GC-A--------A--C-GCC-G-C-G-T---------G-A-G--T--GA-T-G--A-A-G-G-TC----TT-AG-----------G-A-T--------C-G-T--A---AA-A-C-TC------------------------------TG-TT-A-T--T-AGG----G--A-A--G---AA-CAAA-C---G-T-G--T-A--A----------G--T---------------------AA---------------------------------C--------T-------GT-…	KlePn604	StaLug16	Staphylococcus lugdunensis
>000002323|size:631	0.0159197	96.7%:LacFer70;96.7%:LacFer69	Lactobacillus fermentum	CC-T-AC-G-G-G-A-G-GC--A-GCA-G-T-A-G-G-G-A-A--TC-TT--CC-A-C---AA-T-G-G--GC--GC-A-A--G-C--C-T-GA-T-G-G-A--GC-A--------A--C-ACC-G-C-G-T---------G-A-G--T--GA-A-G--A-A-G-G-GT----TT-CG-----------G-C-T--------C-G-T--A---AA-G-C-TC------------------------------TG-TT-G-T--T-AAA----G--A-A--G---AA-CACG-T---A-T-G--A-G--A----------G--T---------------------AA---------------------------------C--------T-------GT-…	LacFer70	LacFer69	Lactobacillus fermentum
>000013868|size:639	0.0158876	96.5%:RmnSpe31;96.5%:RmnSpe30	Blautia wexlerae	CC-T-AC-G-G-G-A-G-GC--A-GCA-G-T-G-G-G-G-A-A--TA-TT--GC-A-C---AA-T-G-G--GG--GA-A-A--C-C--C-T-GA-T-G-C-A--GC-G--------A--C-GCC-G-C-G-T---------G-A-A--G--GA-A-G--A-A-G-T-AT----CT-CG-----------G-T-A--------T-G-T--A---AA-C-T-TC------------------------------TA-TC-A-G--C-AGG----G--A-A--G---A-------------------------------------T---------------------AG-----------------------------------------------------…	RmnSpe31	RmnSpe30	Blautia wexlerae
>000013513|size:1003	0.0158843	95.2%:EnrCl498;95.2%:EnrCl489		CC-T-AC-G-G-G-A-G-GC--A-GCA-G-T-G-G-G-G-A-A--TA-TT--GC-A-C---AA-T-G-G--GC--GC-A-A--G-C--C-T-GA-T-G-C-A--GC-C--------A--T-GCC-G-C-G-T---------G-T-A--T--GA-A-G--A-A-G-G-CC----TT-CG-----------G-G-T--------T-G-T--A---AA-G-T-AC------------------------------TT-TC-A-G--C-GGG----G--A-G--G---AA--GGC-G---A-C-A--G-G--G----------T--T---------------------AA---------------------------------T---A----A-------CC-…	EnrCl498	EnrCl489	Enterobacter cloacae
>000010428|size:1103	0.0158214	95.4%:StaAu564;95.4%:EntFa534		CC-T-AC-G-G-G-A-G-GC--A-GCA-G-T-A-G-G-G-A-A--TC-TT--CG-G-C---AA-T-G-G--AC--GA-A-A--G-T--C-T-GA-C-C-G-A--GC-A--------A--C-GCC-G-C-G-T---------G-A-G--T--GA-A-G--A-A-G-G-TT----TT-CG-----------G-A-T--------C-G-T--A---AA-A-C-TC------------------------------TG-TT-G-T--T-AGA----G--A-A--G---AA-CAAG-G---A-C-G--T-T--A----------G--T---------------------AA---------------------------------C--------T-------GA-…	StaAu564	EntFa534	Enterococcus faecalis
>000007727|size:1317	0.0157565	93.7%:ClsPar22;93.7%:ClsPar21		CC-T-AC-G-G-G-A-G-GC--A-GCA-G-T-G-G-G-G-A-A--TA-TT--GC-A-C---AA-T-G-G--GG--GA-A-A--C-C--C-T-GA-T-G-C-A--GC-A--------A--C-GCC-G-C-G-T---------G-A-G--T--GA-T-G--A-C-G-G-CC----TT-CG-----------G-G-T--------T-G-T--A---AA-G-C-TC------------------------------TG-TC-T-T--T-GGG----G--A-C--G---A-------------------------------------T---------------------AA-----------------------------------------------------…	ClsPar22	ClsPar21	Clostridium paraputrificum
>000008195|size:1227	0.0157444	97.9%:ClsPer86;97.9%:ClsPer59		CC-T-AC-G-G-G-A-G-GC--A-GCA-G-T-G-G-G-G-A-A--TA-TT--GC-A-C---AA-T-G-G--GG--GA-A-A--C-C--C-T-GA-T-G-C-A--GC-A--------A--C-GCC-G-C-G-T---------G-A-G--T--GA-T-G--A-A-G-G-TT----TT-CG-----------G-A-T--------C-G-T--A---AA-G-C-TC------------------------------TG-TC-T-T--T-GGG----G--A-A--G---A-------------------------------------T---------------------AA-----------------------------------------------------…	ClsPer86	ClsPer59	Clostridium perfringens
>000013027|size:1201	0.0156515	94.1%:EnrCl498;94.1%:EnrCl489		CC-T-AC-G-G-G-A-G-GC--A-GCA-G-T-G-G-G-G-A-A--TA-TT--GC-A-C---AA-T-G-G--GC--GC-A-A--G-C--C-T-GA-T-G-C-A--GC-C--------A--T-GCC-G-C-G-T---------G-T-A--T--GA-A-G--A-A-G-G-CC----TT-CG-----------G-G-T--------T-G-T--A---AA-G-T-AC------------------------------TT-TC-A-G--C-GGG----G--A-G--G---AA--GGC-G---A-C-A--G-G--G----------T--T---------------------AA---------------------------------T---A----A-------CC-…	EnrCl498	EnrCl489	Enterobacter cloacae
>000010696|size:928	0.0156299	97.8%:EntFa540;97.8%:EntFa539		CC-T-AC-G-G-G-A-G-GC--A-GCA-G-T-A-G-G-G-A-A--TC-TT--CG-G-C---AA-T-G-G--AC--GA-A-A--G-T--C-T-GA-C-C-G-A--GC-A--------A--C-GCC-G-C-G-T---------G-A-G--T--GA-A-G--A-A-G-G-TT----TT-CG-----------G-A-T--------C-G-T--A---AA-A-C-TC------------------------------TG-TT-G-T--T-AGA----G--A-A--G---AA-CAAG-G---A-T-G--A-G--A----------G--T---------------------AA---------------------------------C--------T-------GT-…	EntFa540	EntFa539	Enterococcus faecium
>000006196|size:1174	0.0155888	91.4%:PntCali2;91.4%:PntCalid		CC-T-AC-G-G-G-A-G-GC--A-GCA-G-T-G-G-G-G-A-A--TA-TT--GC-A-C---AA-T-G-G--GC--GC-A-A--G-C--C-T-GA-T-G-C-A--GC-C--------A--T-GCC-G-C-G-T---------G-T-A--T--GA-A-G--A-A-G-G-CC----TT-CG-----------G-G-T--------T-G-T--A---AA-G-T-AC------------------------------TT-TC-A-G--C-GGG----G--A-G--G---AA--GGG-A---T-G-G--T-G--C----------T--T---------------------AA---------------------------------T---A----C-------GC-…	PntCali2	PntCalid	Pantoea calida
>000014812|size:1064	0.0155423	97.8%:KleOx242;97.8%:KleOx241		CC-T-AC-G-G-G-A-G-GC--A-GCA-G-T-G-G-G-G-A-A--TA-TT--GC-A-C---AA-T-G-G--GC--GC-A-A--G-C--C-T-GA-T-G-C-A--GC-C--------A--T-GCC-G-C-G-T---------G-T-A--T--GA-A-G--A-A-G-G-CC----TT-CG-----------G-G-T--------T-G-T--A---AA-G-T-AC------------------------------TT-TC-A-G--C-GGG----G--A-G--G---AA--GGC-G---A-T-A--A-G--G----------T--T---------------------AA---------------------------------T---A----A-------CC-…	KleOx242	KleOx241	Klebsiella oxytoca
>000011916|size:1486	0.0155145	95.2%:VeiSpe42;95.2%:VeiPar12		CC-T-AC-G-G-G-A-G-GC--A-GCA-G-T-G-G-G-G-A-A--TC-TT--CC-G-C---AA-T-G-G--AC--GA-A-A--G-T--C-T-GA-C-G-G-A--GC-A--------A--C-GCC-G-C-G-T---------G-A-G--T--GA-T-G--A-C-G-G-CC----TT-CG-----------G-G-T--------T-G-T--A---AA-G-C-TC------------------------------TG-TT-A-A--T-CGG----G--A-C--G---AA-AGGC-C---T-T-C--T-T--G----------C--G---------------------AA---------------------------------C---A----G-------TT-…	VeiSpe42	VeiPar12	Veillonella parvula
>000000491|size:1052	0.0155023	94.1%:StaEp124;94.1%:StaEp123		CC-T-AC-G-G-G-A-G-GC--A-GCA-G-T-A-G-G-G-A-A--TC-TT--CC-G-C---AA-T-G-G--GC--GA-A-A--G-C--C-T-GA-C-G-G-A--GC-A--------A--C-GCC-G-C-G-T---------G-A-G--T--GA-T-G--A-A-G-G-TC----TT-CG-----------G-A-T--------C-G-T--A---AA-A-C-TC------------------------------TG-TT-A-T--T-AGG----G--A-A--G---AA-TAAA-T---G-T-G--T-A--A----------G--T---------------------AA---------------------------------C--------T-------AT-…	StaEp124	StaEp123	Staphylococcus epidermidis
>000011356|size:808	0.0154555	89.5%:AcyRadin;65.6%:AcySuim2		CC-T-AC-G-G-G-A-G-GC--A-GCA-G-T-G-G-G-G-A-A--TT-TT--GC-A-C---AA-T-G-G--GG--GG-A-A--C-C--T-T-GA-T-G-C-A--GC-G--------A--C-GCC-G-C-G-T---------G-A-G--G--GA-T-G--G-A-G-G-CC----TT-CG-----------G-G-T--------T-G-T--G---AA-C-C-TC------------------------------TT-TC-G-C--T-CGT----G--T-G--C---AA--GCC-G---C-T-A--T-T---------------------------------------T---------------------------------G-----------------G-…	AcyRadin	AcySuim2	Actinomyces radingae
>000000866|size:1104	0.0153656	95.2%:BifScar6;95.2%:BifScar5		CC-T-AC-G-G-G-A-G-GC--A-GCA-G-T-G-G-G-G-A-A--TA-TT--GC-A-C---AA-T-G-G--GC--GC-A-A--G-C--C-T-GA-T-G-C-A--GC-G--------A--C-GCC-G-C-G-T---------G-A-G--G--GA-T-G--G-A-G-G-CC----TT-CG-----------G-G-T--------T-G-T--A---AA-C-C-TC------------------------------TT-TT-A-G--C-AGG----G--A-G--C---AA-GG-C-------------------------------T---------------------TC---------------------------------G-------------------…	BifScar6	BifScar5	Bifidobacterium scardovii
>000001811|size:1175	0.0152876	97.1%:LacAnim8;97.1%:LacAnim6		CC-T-AC-G-G-G-A-G-GC--A-GCA-G-T-A-G-G-G-A-A--TC-TT--CC-A-C---AA-T-G-G--GC--GA-A-A--G-C--C-T-GA-T-G-G-A--GC-A--------A--C-GCC-G-C-G-T---------G-G-G--T--GA-A-G--A-A-G-G-TC----TT-CG-----------G-A-T--------C-G-T--A---AA-A-C-CC------------------------------TG-TT-G-T--T-AGA----G--A-A--G---AA-AGTG-C---G-T-G--A-G--A----------G--T---------------------AA---------------------------------C--------T-------GT-…	LacAnim8	LacAnim6	Lactobacillus animalis
>000007603|size:1057	0.0150553	95.4%:CtbFr155;95.4%:KlvAsc19		CC-T-AC-G-G-G-A-G-GC--A-GCA-G-T-G-G-G-G-A-A--TA-TT--GC-A-C---AA-T-G-G--GC--GC-A-A--G-C--C-T-GA-T-G-C-A--GC-C--------A--T-GCC-G-C-G-T---------G-T-A--T--GA-A-G--A-A-G-G-CC----TT-CG-----------G-G-T--------T-G-T--A---AA-G-T-AC------------------------------TT-TC-A-G--C-GAG----G--A-G--G---AA--GGC-G---T-T-G--T-G--G----------T--T---------------------AA---------------------------------T---A----A-------CC-…	CtbFr155	KlvAsc19	Citrobacter freundii
>000015926|size:1082	0.0150023	97.8%:PntAg164;97.8%:PntCons2	Pantoea agglomerans	CC-T-AC-G-G-G-A-G-GC--A-GCA-G-T-G-G-G-G-A-A--TA-TT--GC-A-C---AA-T-G-G--GC--GC-A-A--G-C--C-T-GA-T-G-C-A--GC-C--------A--T-GCC-G-C-G-T---------G-T-A--T--GA-A-G--A-A-G-G-CC----TT-CG-----------G-G-T--------T-G-T--A---AA-G-T-AC------------------------------TT-TC-A-G--C-GGG----G--A-G--G---AA--GGC-G---A-T-G--C-G--G----------T--T---------------------AA---------------------------------T---A----A-------CC-…	PntAg164	PntCons2	Pantoea agglomerans
>000005232|size:1117	0.0149805	94.1%:StaEp124;94.1%:StaEp123		CC-T-AC-G-G-G-A-G-GC--A-GCA-G-T-A-G-G-G-A-A--TC-TT--CC-G-C---AA-T-G-G--GC--GA-A-A--G-C--C-T-GA-C-G-G-A--GC-A--------A--C-GCC-G-C-G-T---------G-A-G--T--GA-T-G--A-A-G-G-TC----TT-CG-----------G-A-T--------C-G-T--A---AA-A-C-TC------------------------------TG-TT-A-T--T-AGG----G--A-A--G---AA-CAAA-T---G-T-G--T-A--A----------G--T---------------------AA---------------------------------C--------T-------AT-…	StaEp124	StaEp123	Staphylococcus epidermidis
>000012135|size:890	0.0148429	96.7%:StaEpi99;96.7%:StaEpi80		CC-T-AC-G-G-G-A-G-GC--A-GCA-G-T-A-G-G-G-A-A--TC-TT--CC-G-C---AA-T-G-G--GC--GA-A-A--G-C--T-T-GA-C-G-G-A--GC-A--------A--C-GCC-G-C-G-T---------G-A-G--T--GA-T-G--A-A-G-G-TC----TT-CG-----------G-A-T--------C-G-T--A---AA-A-C-TC------------------------------TG-TT-A-T--T-AGG----G--A-A--G---AA-CAAA-T---G-T-G--T-A--A----------G--T---------------------AA---------------------------------C--------T-------AT-…	StaEpi99	StaEpi80	Staphylococcus epidermidis
>000013386|size:1210	0.0147936	94.1%:EnrCl527;94.1%:EnrCl526		CC-T-AC-G-G-G-A-G-GC--A-GCA-G-T-G-G-G-G-A-A--TA-TT--GC-A-C---AA-T-G-G--GC--GC-A-A--G-C--C-T-GA-T-G-C-A--GC-C--------A--T-GCC-G-C-G-T---------G-T-G--T--GA-A-G--A-A-G-G-CC----TT-CG-----------G-G-T--------T-G-T--A---AA-G-T-AC------------------------------TT-TC-A-G--C-GGG----G--A-G--G---AA--GGC-G---A-T-A--A-G--G----------T--T---------------------AA---------------------------------T---A----A-------CC-…	EnrCl527	EnrCl526	Enterobacter cloacae
>000013882|size:864	0.0146696	96.5%:RmnGna13;96.5%:RmnGna10		CC-T-AC-G-G-G-A-G-GC--A-GCA-G-T-G-G-G-G-A-A--TA-TT--GC-A-C---AA-T-G-G--GG--GA-A-A--C-C--C-T-GA-T-G-C-A--GC-G--------A--C-GCC-G-C-G-T---------G-A-G--C--GA-T-G--A-A-G-T-AT----TT-CG-----------G-T-A--------T-G-T--A---AA-G-C-TC------------------------------TA-TC-A-G--C-AGG----G--A-A--G---A-------------------------------------A---------------------AA-----------------------------------------------------…	RmnGna13	RmnGna10	[Ruminococcus] gnavus
>000009992|size:626	0.0145293	94.1%:AciGui12;94.1%:AciGui11		CC-T-AC-G-G-G-A-G-GC--A-GCA-G-T-G-G-G-G-A-A--TA-TT--GG-A-C---AA-T-G-G--GG--GG-A-A--C-C--C-T-GA-T-C-C-A--GC-C--------A--T-GCC-G-C-G-T---------G-T-G--T--GA-A-G--A-A-G-G-CC----TT-AT-----------G-G-T--------T-G-T--A---AA-G-C-AC------------------------------TT-TA-A-G--C-GAG----G--A-G--G---AG--GCT-C---T-C-T--T-G--G----------T--T---------------------AA---------------------------------T---A----C-------CC-…	AciGui12	AciGui11	Acinetobacter guillouiae/iwoffii
>000006572|size:1353	0.0145141	96.9%:KleP1015;96.9%:KleP1009		CC-T-AA-G-G-G-A-G-GC--A-GCA-G-T-G-G-G-G-A-A--TA-TT--GC-A-C---AA-T-G-G--GC--GC-A-A--G-C--C-T-GA-T-G-C-A--GC-C--------A--T-GCC-G-C-G-T---------G-T-G--T--GA-A-G--A-A-G-G-CC----TT-CG-----------G-G-T--------T-G-T--A---AA-G-C-AC------------------------------TT-TC-A-G--C-GGG----G--A-G--G---AA--GGC-G---G-T-G--A-G--G----------T--T---------------------AA---------------------------------T---A----A-------CC-…	KleP1015	KleP1009	Klebsiella pneumoniae
>000006012|size:875	0.0144668	95.4%:EscFer15;95.2%:ShiSon39		CC-T-AC-G-G-G-A-G-GC--A-GCA-G-T-G-G-G-G-A-A--TA-TT--GC-A-C---AA-T-G-G--GC--GC-A-A--G-C--C-T-GA-T-G-C-A--GC-C--------A--T-GCC-G-C-G-T---------G-T-A--T--GA-A-G--A-A-G-G-CC----TT-CG-----------G-G-T--------T-G-T--A---AA-G-T-AC------------------------------TT-TC-A-G--C-GGG----G--A-G--G---AA--GGG-A---G-T-A--A-A--G----------T--T---------------------AA---------------------------------T---A----C-------CT-…	EscFer15	ShiSon39	Enterococcus faecium
>000015964|size:2532	0.0144436	90.8%:StaEp124;90.8%:StaEp123		CC-T-AC-G-G-G-A-G-GC--A-GCA-G-T-A-G-G-G-A-A--TC-TT--CC-G-C---AA-T-G-G--GC--GA-A-A--G-C--C-T-GA-C-G-G-A--GC-A--------A--C-GCC-G-C-G-T---------G-A-G--T--GA-T-G--A-A-G-G-TC----TT-CG-----------G-A-T--------C-G-T--A---AA-A-C-TC------------------------------TG-TT-A-T--T-AGG----G--A-A--G---AA-CAAA-T---G-T-G--T-A--A----------G--T---------------------AA---------------------------------C--------T-------AT-…	StaEp124	StaEp123	Staphylococcus epidermidis
>000010938|size:1399	0.0144417	98.0%:KleOx234;98.0%:KleOx231		CC-T-AC-G-G-G-A-G-GC--A-GCA-G-T-G-G-G-G-A-A--TA-TT--GC-A-C---AA-T-G-G--GC--GC-A-A--G-C--C-T-GA-T-G-C-A--GC-C--------A--T-GCC-G-C-G-T---------G-T-A--T--GA-A-G--A-A-G-G-CC----TT-CG-----------G-G-T--------T-G-T--A---AA-G-T-AC------------------------------TT-TC-A-G--C-GGG----G--A-G--G---AA--GGT-G---T-T-G--A-G--G----------T--T---------------------AA---------------------------------T---A----A-------CC-…	KleOx234	KleOx231	Klebsiella oxytoca
>000013289|size:1089	0.0143242	97.8%:KleP1015;97.8%:KleP1009		CC-T-AC-G-G-G-A-G-GC--A-GCA-G-T-G-G-G-G-A-A--TA-TT--GC-A-C---AA-T-G-G--GC--GC-A-A--G-C--C-T-GA-T-G-C-A--GC-C--------A--T-GCC-G-C-G-T---------G-T-G--T--GA-A-G--A-A-G-G-CC----TT-CG-----------G-G-T--------T-G-T--A---AA-G-C-AC------------------------------TT-TC-A-G--C-GGG----G--A-G--G---AA--GGC-G---G-T-G--A-G--G----------T--T---------------------AA---------------------------------T---A----A-------CC-…	KleP1015	KleP1009	Klebsiella pneumoniae
>000010069|size:790	0.0143192	95.4%:UndOligo;88.8%:BacPH120		CC-T-AC-G-G-G-A-G-GC--A-GCA-G-T-G-G-G-G-A-A--TT-TT--GG-A-C---AA-T-G-G--GG--GC-A-A--C-C--C-T-GA-T-C-C-A--GC-A--------A--T-GCC-G-C-G-T---------G-A-G--T--GA-A-G--A-A-G-G-CC----CT-CG-----------G-G-T--------T-G-T--A---AA-G-C-TC------------------------------TT-TT-G-T--C-AGG----G--A-A--G---AA--ACG-G---A-G-T--T-C--T----------C--T---------------------AA---------------------------------T---A----T-------AG-…	UndOligo	BacPH120	Undibacterium oligocarboniphilum
>000007598|size:1041	0.0143107	98.0%:ShiFle91;98.0%:CtbFr153		CC-T-AC-G-G-G-A-G-GC--A-GCA-G-T-G-G-G-G-A-A--TA-TT--GC-A-C---AA-T-G-G--GC--GC-A-A--G-C--C-T-GA-T-G-C-A--GC-C--------A--T-GCC-G-C-G-T---------G-T-A--T--GA-A-G--A-A-G-G-CC----TT-CG-----------G-G-T--------T-G-T--A---AA-G-T-AC------------------------------TT-TC-A-G--C-GAG----G--A-G--G---AA--GGC-G---T-T-G--T-G--G----------T--T---------------------AA---------------------------------T---A----A-------CC-…	ShiFle91	CtbFr153	Escherichia/Shigella
>000011007|size:863	0.0140578	98.0%:EnrCl529;98.0%:EnrCl528		CC-T-AC-G-G-G-A-G-GC--A-GCA-G-T-G-G-G-G-A-A--TA-TT--GC-A-C---AA-T-G-G--GC--GC-A-A--G-C--C-T-GA-T-G-C-A--GC-C--------A--T-GCC-G-C-G-T---------G-T-A--T--GA-A-G--A-A-G-G-CC----TT-CG-----------G-G-T--------T-G-T--A---AA-G-T-AC------------------------------TT-TC-A-G--C-GGG----G--A-G--G---AA--GGT-G---T-T-G--A-G--G----------T--T---------------------AA---------------------------------T---A----A-------CC-…	EnrCl529	EnrCl528	Enterobacter cloacae
>000002151|size:883	0.0139992	99.8%:UndOligo;93.2%:BacPH120		CC-T-AC-G-G-G-A-G-GC--A-GCA-G-T-G-G-G-G-A-A--TT-TT--GG-A-C---AA-T-G-G--GG--GC-A-A--C-C--C-T-GA-T-C-C-A--GC-A--------A--T-GCC-G-C-G-T---------G-A-G--T--GA-A-G--A-A-G-G-CC----CT-CG-----------G-G-T--------T-G-T--A---AA-G-C-TC------------------------------TT-TT-G-T--C-AGG----G--A-A--G---AA--ACG-G---A-G-T--T-C--T----------C--T---------------------AA---------------------------------T---A----T-------AG-…	UndOligo	BacPH120	Undibacterium oligocarboniphilum
>000012013|size:1258	0.0139418	94.1%:StaEp122;94.1%:StaCap17		CC-T-AC-G-G-G-A-G-GC--A-GCA-G-T-A-G-G-G-A-A--TC-TT--CC-G-C---AA-T-G-G--GC--GA-A-A--G-C--C-T-GA-C-G-G-A--GC-A--------A--C-GCC-G-C-G-T---------G-A-G--T--GA-A-G--A-A-G-G-TC----TT-CG-----------G-A-T--------A-G-T--A---AA-A-C-TC------------------------------TG-TT-A-T--T-AGG----G--A-A--G---AA-CAAA-T---G-T-G--T-A--A----------G--T---------------------AA---------------------------------C--------T-------AT-…	StaEp122	StaCap17	Staphylococcus epidermidis
>000006673|size:1112	0.0137149	95.2%:KleP1015;95.2%:KleP1009		CC-T-AC-G-G-G-A-G-GC--A-GCA-G-T-G-G-G-G-A-A--TA-TT--GC-A-C---AA-T-G-G--GC--GC-A-A--G-C--C-T-GA-T-G-C-A--GC-C--------A--T-GCC-G-C-G-T---------G-T-A--T--GA-A-G--A-A-G-G-CC----TT-CG-----------G-G-T--------T-G-T--A---AA-G-C-AC------------------------------TT-TC-A-G--C-GGG----G--A-G--G---AA--GGC-G---G-T-G--A-G--G----------T--T---------------------AA---------------------------------T---A----A-------CC-…	KleP1015	KleP1009	Klebsiella pneumoniae
>000011430|size:658	0.013714	96.7%:JF9Dela3;96.7%:JF9Dela2	Ralstonia insidiosa	CC-T-AC-G-G-G-A-G-GC--A-GCA-G-T-G-G-G-G-A-A--TT-TT--GG-A-C---AA-T-G-G--GG--GC-A-A--C-C--C-T-GA-T-C-C-A--GC-A--------A--T-GCC-G-C-G-T---------G-T-G--T--GA-A-G--A-A-G-G-CC----TT-CG-----------G-G-T--------T-G-T--A---AA-G-C-AC------------------------------TT-TT-G-T--C-CGG----A--A-A--G---AA--ATC-G---C-A-C--T-T--A----------C--T---------------------AA---------------------------------T---A----T-------TA-…	JF9Dela3	JF9Dela2	Ralstonia insidiosa
>000011625|size:995	0.0136954	95.4%:CtbFr154;95.4%:CtbFr149		CC-T-AC-G-G-G-A-G-GC--A-GCA-G-T-G-G-G-G-A-A--TA-TT--GC-A-C---AA-T-G-G--GC--GC-A-A--G-C--C-T-GA-T-G-C-A--GC-C--------A--T-GCC-G-C-G-T---------G-T-A--T--GA-A-G--A-A-G-G-CC----TT-CG-----------G-G-T--------T-G-T--A---AA-G-T-AC------------------------------TT-TC-A-G--C-GAG----G--A-G--G---AA--GGC-A---T-T-A--A-G--G----------T--T---------------------AA---------------------------------T---A----A-------CC-…	CtbFr154	CtbFr149	Citrobacter freundii
>000000083|size:842	0.0136826	96.3%:CtbFreu3;94.1%:CtbFr135	Citrobacter freundii	CC-T-AC-G-G-G-A-G-GC--A-GCA-G-T-G-G-G-G-A-A--TA-TT--GC-A-C---AA-T-G-G--GC--GC-A-A--G-C--C-T-GA-T-G-C-A--GC-C--------A--T-GCC-G-C-G-T---------G-T-A--T--GA-A-G--A-A-G-G-CC----TT-CG-----------G-G-T--------T-G-T--A---AA-G-T-AC------------------------------TT-TC-A-G--C-GAG----G--A-G--G---AA--GGT-G---T-T-G--T-G--G----------T--T---------------------AA---------------------------------T---A----A-------CC-…	CtbFreu3	CtbFr135	Citrobacter freundii
>000001945|size:901	0.0135871	97.2%:AciGui12;97.2%:AciGui11		CC-T-AC-G-G-G-A-G-GC--A-GCA-G-T-G-G-G-G-A-A--TA-TT--GG-A-C---AA-T-G-G--GG--GG-A-A--C-C--C-T-GA-T-C-C-A--GC-C--------A--T-GCC-G-C-G-T---------G-T-G--T--GA-A-G--A-A-G-G-CC----TT-AT-----------G-G-T--------T-G-T--A---AA-G-C-AC------------------------------TT-TA-A-G--C-GAG----G--A-G--G---AG--GCT-C---T-C-T--T-G--G----------T--T---------------------AA---------------------------------T---A----C-------CC-…	AciGui12	AciGui11	Acinetobacter guillouiae/iwoffii
>000008372|size:907	0.0135019	96.5%:PpcDi105;96.5%:PpcDi102		CC-T-AC-G-G-G-A-G-GC--A-GCA-G-T-G-G-G-G-A-A--TA-TT--GC-A-C---AA-T-G-G--GC--GA-A-A--G-C--C-T-GA-T-G-C-A--GC-A--------A--C-GCC-G-C-G-T---------G-A-G--T--GA-T-G--A-A-G-G-CC----TT-CG-----------G-G-T--------C-G-T--A---AA-A-C-TC------------------------------TG-TC-C-T--C-AAG----G--A-A--G---A-------------------------------------T---------------------AA-----------------------------------------------------…	PpcDi105	PpcDi102	Clostridioides difficile
>000001658|size:741	0.0135009	96.7%:KlePn604;96.7%:StaLug16		CC-T-AC-G-G-G-A-G-GC--A-GCA-G-T-A-G-G-G-A-A--TC-TT--CC-G-C---AA-T-G-G--GC--GA-A-A--G-C--C-T-GA-C-G-G-A--GC-A--------A--C-GCC-G-C-G-T---------G-A-G--T--GA-T-G--A-A-G-G-TC----TT-AG-----------G-A-T--------C-G-T--A---AA-A-C-TC------------------------------TG-TT-A-T--T-AGG----G--A-A--G---AA-CAAA-C---G-T-G--T-A--A----------G--T---------------------AA---------------------------------C--------T-------GT-…	KlePn604	StaLug16	Staphylococcus lugdunensis
>000007726|size:699	0.0134977	97.0%:ClsPar22;97.0%:ClsPar21		CC-T-AC-G-G-G-A-G-GC--A-GCA-G-T-G-G-G-G-A-A--TA-TT--GC-A-C---AA-T-G-G--GG--GA-A-A--C-C--C-T-GA-T-G-C-A--GC-A--------A--C-GCC-G-C-G-T---------G-A-G--T--GA-T-G--A-C-G-G-CC----TT-CG-----------G-G-T--------T-G-T--A---AA-G-C-TC------------------------------TG-TC-T-T--T-GGG----G--A-C--G---A-------------------------------------T---------------------AA-----------------------------------------------------…	ClsPar22	ClsPar21	Clostridium paraputrificum
>000013779|size:745	0.0133543	96.5%:PpuHarei;93.7%:PpuRhini		CC-T-AC-G-G-G-A-G-GC--A-GCA-G-T-G-G-G-G-A-A--TA-TT--GC-A-C---AA-T-G-G--AG--GG-A-A--C-T--C-T-GA-T-G-C-A--GC-G--------A--C-GCC-G-C-G-T---------G-A-A--C--GA-T-G--A-A-G-G-CT----TT-CG-----------A-G-T--------C-G-T--A---AA-G-T-TC------------------------------TT-TT-A-T--A-TGG----G--A-A--G---A-------------------------------------T---------------------AA-----------------------------------------------------…	PpuHarei	PpuRhini	Peptoniphilus harei
>000010182|size:765	0.0131515	95.4%:SttSa536;95.4%:SttSa535		CC-T-AC-G-G-G-A-G-GC--A-GCA-G-T-A-G-G-G-A-A--TC-TT--CG-G-C---AA-T-G-G--GG--GC-A-A--C-C--C-T-GA-C-C-G-A--GC-A--------A--C-GCC-G-C-G-T---------G-A-G--T--GA-A-G--A-A-G-G-TT----TT-CG-----------G-A-T--------C-G-T--A---AA-G-C-TC------------------------------TG-TT-G-T--A-AGT----C--A-A--G---AA-CGAG-T---G-T-G--A-G--A----------G--T---------------------GG---------------------------------A---A----A-------GT-…	SttSa536	SttSa535	Streptococcus salivarius
>000000494|size:3878	0.0131298	96.9%:StaEp124;96.9%:StaEp123		CC-T-AC-G-G-G-A-G-GC--A-GCA-G-T-A-G-G-G-A-A--TC-TT--CC-G-C---AA-T-G-G--GC--GA-A-A--G-C--C-T-GA-C-G-G-A--GC-A--------A--C-GCC-G-C-G-T---------G-A-G--T--GA-T-G--A-A-G-G-TC----TT-CG-----------G-A-T--------C-G-T--A---AA-A-C-TC------------------------------TG-TT-A-T--T-AGG----G--A-A--G---AA-CAAA-T---G-T-G--T-A--A----------G--T---------------------AA---------------------------------C--------T-------AT-…	StaEp124	StaEp123	Staphylococcus epidermidis
>000013823|size:952	0.0131078	97.0%:AauSpec5;97.0%:AauSpeci		CC-T-AC-G-G-G-A-G-GC--A-GCA-G-T-G-G-G-G-A-A--TT-TT--GC-A-C---AA-T-G-G--GG--GA-A-A--C-C--C-T-GA-T-G-C-A--GC-G--------A--C-GCC-G-C-G-T---------G-A-T--T--TA---G--A-A-G-G-CC----TT-CG-----------G-G-T--------T-G-T--A---AA-A-A-TC------------------------------TT-TT-G-T--A-TAG----G--A-A--G---A-------------------------------------A---------------------AA-----------------------------------------------------…	AauSpec5	AauSpeci	Anaerococcus provencensis
>000008321|size:297	0.0130819	95.1%:RmnGna13;95.1%:RmnGna10		CC-T-AC-G-G-G-A-G-GC--A-GCA-G-T-G-G-G-G-A-A--TA-TT--GC-A-C---AA-T-G-G--GG--GA-A-A--C-C--C-T-GA-T-G-C-A--GC-G--------A--C-GCC-G-C-G-T---------G-A-G--C--GA-T-G--A-A-G-T-AT----TT-CG-----------G-T-A--------T-G-T--A---AA-G-C-TC------------------------------TA-TC-A-G--C-AGG----G--A-A--G---A-------------------------------------A---------------------AA-----------------------------------------------------…	RmnGna13	RmnGna10	[Ruminococcus] gnavus
>000013664|size:800	0.0130685	97.8%:KleP1002;97.8%:KlePn925		CC-T-AC-G-G-G-A-G-GC--A-GCA-G-T-G-G-G-G-A-A--TA-TT--GC-A-C---AA-T-G-G--GC--GC-A-A--G-C--C-T-GA-T-G-C-A--GC-C--------A--T-GCC-G-C-G-T---------G-T-G--T--GA-A-G--A-A-G-G-CC----TT-CG-----------G-G-T--------T-G-T--A---AA-G-C-AC------------------------------TT-TC-A-G--C-GGG----G--A-G--G---AA--GGC-G---A-T-A--A-G--G----------T--T---------------------AA---------------------------------T---A----A-------CC-…	KleP1002	KlePn925	Klebsiella pneumoniae
>000009186|size:1349	0.0130564	94.3%:StaHae36;94.1%:StaHae56	Staphylococcus haemolyticus	CC-T-AC-G-G-G-A-G-GC--A-GCA-G-T-A-G-G-G-A-A--TC-TT--CC-G-C---AA-T-G-G--GC--GA-A-A--G-C--C-T-GA-C-G-G-A--GC-A--------A--C-GCC-G-C-G-T---------G-A-G--T--GA-T-G--A-A-G-G-TC----TT-CG-----------G-A-T--------T-G-T--A---AA-A-C-TC------------------------------TG-TT-A-T--T-AGG----G--A-A--G---AA-CATA-C---G-T-G--T-A--A----------G--T---------------------AA---------------------------------C--------T-------AT-…	StaHae36	StaHae56	Staphylococcus haemolyticus
>000007717|size:1133	0.0130357	97.7%:ClsPar22;97.7%:ClsPar21		CC-T-AC-G-G-G-A-G-GC--A-GCA-G-T-G-G-G-G-A-A--TA-TT--GC-A-C---AA-T-G-G--GG--GA-A-A--C-C--C-T-GA-T-G-C-A--GC-A--------A--C-GCC-G-C-G-T---------G-A-G--T--GA-T-G--A-C-G-G-CC----TT-CG-----------G-G-T--------T-G-T--A---AA-G-C-TC------------------------------TG-TC-T-T--T-GGG----G--A-C--G---A-------------------------------------T---------------------AA-----------------------------------------------------…	ClsPar22	ClsPar21	Clostridium paraputrificum
>000007278|size:648	0.0130092	96.7%:PntSte20;94.1%:PntSep13		CC-T-AC-G-G-G-A-G-GC--A-GCA-G-T-G-G-G-G-A-A--TA-TT--GC-A-C---AA-T-G-G--GC--GC-A-A--G-C--C-T-GA-T-G-C-A--GC-C--------A--T-GCC-G-C-G-T---------G-T-A--T--GA-A-G--A-A-G-G-CC----TT-CG-----------G-G-T--------T-G-T--A---AA-G-T-AC------------------------------TT-TC-A-G--C-GGG----G--A-G--G---AA--GGC-G---A-T-G--C-G--G----------T--T---------------------AA---------------------------------T---A----A-------CC-…	PntSte20	PntSep13	Pantoea septica
>000014125|size:812	0.0129785	97.8%:EntFa540;97.8%:EntFa539		CC-T-AC-G-G-G-A-G-GC--A-GCA-G-T-A-G-G-G-A-A--TC-TT--CG-G-C---AA-T-G-G--AC--GA-A-A--G-T--C-T-GA-C-C-G-A--GC-A--------A--C-GCC-G-C-G-T---------G-A-G--T--GA-A-G--A-A-G-G-TT----TT-CG-----------G-A-T--------C-G-T--A---AA-A-C-TC------------------------------TG-TT-G-T--T-AGA----G--A-A--G---AA-CAAG-G---A-T-G--A-G--A----------G--T---------------------AA---------------------------------C--------T-------GT-…	EntFa540	EntFa539	Enterococcus faecium
>000011047|size:684	0.0129323	97.8%:KleOx225;97.8%:KleOx224		CC-T-AC-G-G-G-A-G-GC--A-GCA-G-T-G-G-G-G-A-A--TA-TT--GC-A-C---AA-T-G-G--GC--GC-A-A--G-C--C-T-GA-T-G-C-A--GC-C--------A--T-GCC-G-C-G-T---------G-T-A--T--GA-A-G--A-A-G-G-CC----TT-CG-----------G-G-T--------T-G-T--A---AA-G-T-AC------------------------------TT-TC-A-G--C-GGG----G--A-G--G---AA--GGT-G---C-T-G--A-G--G----------T--T---------------------AA---------------------------------T---A----A-------CC-…	KleOx225	KleOx224	Klebsiella oxytoca
>000010124|size:894	0.0128938	94.1%:UndOligo;87.5%:BacPH120		CC-T-AC-G-G-G-A-G-GC--A-GCA-G-T-G-G-G-G-A-A--TT-TT--GG-A-C---AA-T-G-G--GG--GC-A-A--C-C--C-T-GA-T-C-C-A--GC-A--------A--T-GCC-G-C-G-T---------G-A-G--T--GA-A-G--A-A-G-G-CC----CT-CG-----------G-G-T--------T-G-T--A---AA-G-C-TC------------------------------TT-TT-G-T--C-AGG----G--A-A--G---AA--ACG-G---A-G-T--T-C--T----------C--T---------------------AA---------------------------------T---A----T-------AG-…	UndOligo	BacPH120	Undibacterium oligocarboniphilum
>000014829|size:528	0.0128792	95.2%:EnrCl498;95.2%:EnrCl489		CC-T-AC-G-G-G-A-G-GC--A-GCA-G-T-G-G-G-G-A-A--TA-TT--GC-A-C---AA-T-G-G--GC--GC-A-A--G-C--C-T-GA-T-G-C-A--GC-C--------A--T-GCC-G-C-G-T---------G-T-A--T--GA-A-G--A-A-G-G-CC----TT-CG-----------G-G-T--------T-G-T--A---AA-G-T-AC------------------------------TT-TC-A-G--C-GGG----G--A-G--G---AA--GGC-G---A-C-A--G-G--G----------T--T---------------------AA---------------------------------T---A----A-------CC-…	EnrCl498	EnrCl489	Enterobacter cloacae
>000009304|size:1007	0.0128185	96.7%:BcsFra39;96.7%:BcsFra38		CC-T-AC-G-G-G-A-G-GC--A-GCA-G-T-G-A-G-G-A-A--TA-TT--GG-T-C---AA-T-G-G--GC--GC-T-A--G-C--C-T-GA-A-C-C-A--GC-C--------A--A-GTA-G-C-G-T---------G-A-A--G--GA-T-G--A-A-G-G-CT-C--TA-TG-----------G-G-T--------C-G-T--A---AA-C-T-TC------------------------------TT-TT-A-T--A-TAA----G--A-A--T---AA-AGTG-C---A-G-T--A------------------T---------------------GT---------------------------------A-------------------…	BcsFra39	BcsFra38	Bacteroides fragilis
>000012073|size:692	0.0126876	95.2%:StaEp124;95.2%:StaEp123		CC-T-AC-G-G-G-A-G-GC--A-GCA-G-T-A-G-G-G-A-A--TC-TT--CC-G-C---AA-T-G-G--GC--GA-A-A--G-C--C-T-GA-C-G-G-A--GC-A--------A--C-GCC-G-C-G-T---------G-A-G--T--GA-T-G--A-A-G-G-TC----TT-CG-----------G-A-T--------C-G-T--A---AA-A-C-TC------------------------------TG-TT-A-T--T-AGG----G--A-A--G---AA-CAAA-T---G-T-G--T-A--A----------G--T---------------------AA---------------------------------C--------T-------AT-…	StaEp124	StaEp123	Staphylococcus epidermidis
>000004954|size:1387	0.0126702	94.1%:StaEp124;94.1%:StaEp123		CC-T-AC-G-G-G-A-G-GC--A-GCA-G-T-A-G-G-G-A-A--TC-TT--CC-G-C---AA-T-G-G--GC--GA-A-A--G-C--C-T-GA-C-G-G-A--GC-A--------A--C-GCC-G-C-G-T---------G-A-G--T--GA-T-G--A-A-G-G-TC----TT-CG-----------G-A-T--------C-G-T--A---AA-A-C-TC------------------------------TG-TT-A-T--T-AGG----G--A-A--G---AA-TAAA-T---G-T-G--T-A--A----------G--T---------------------AA---------------------------------C--------T-------AT-…	StaEp124	StaEp123	Staphylococcus epidermidis
>000003870|size:656	0.0126514	98.0%:DftAci28;98.0%:DftAci27		CC-T-AC-G-G-G-A-G-GC--A-GCA-G-T-G-G-G-G-A-A--TT-TT--GG-A-C---AA-T-G-G--GC--GA-A-A--G-C--C-T-GA-T-C-C-A--GC-A--------A--T-GCC-G-C-G-T---------G-C-A--G--GA-T-G--A-A-G-G-CC----TT-CG-----------G-G-T--------T-G-T--A---AA-C-T-GC------------------------------TT-TT-G-T--A-CGG----A--A-C--G---AA--AAA-G---C-T-T--C-T--C----------C--T---------------------AA---------------------------------T---A----C-------GA-…	DftAci28	DftAci27	Delftia acidovorans
>000013940|size:1250	0.0125844	96.7%:BcsFra39;96.7%:BcsFra38		CC-T-AC-G-G-G-A-G-GC--A-GCA-G-T-G-A-G-G-A-A--TA-TT--GG-T-C---AA-T-G-G--GC--GC-T-A--G-C--C-T-GA-A-C-C-A--GC-C--------A--A-GTA-G-C-G-T---------G-A-A--G--GA-T-G--A-A-G-G-CT-C--TA-TG-----------G-G-T--------C-G-T--A---AA-C-T-TC------------------------------TT-TT-A-T--A-TAA----G--A-A--T---AA-AGTG-C---A-G-T--A------------------T---------------------GT---------------------------------A-------------------…	BcsFra39	BcsFra38	Bacteroides fragilis
>000001789|size:899	0.0125798	95.1%:BcsFra39;95.1%:BcsFra38		CC-T-AC-G-G-G-A-G-GC--A-GCA-G-T-G-A-G-G-A-A--TA-TT--GG-T-C---AA-T-G-G--GC--GC-T-A--G-C--C-T-GA-A-C-C-A--GC-C--------A--A-GTA-G-C-G-T---------G-A-A--G--GA-T-G--A-A-G-G-CT-C--TA-TG-----------G-G-T--------C-G-T--A---AA-C-T-TC------------------------------TT-TT-A-T--A-TAA----G--A-A--T---AA-AGTG-C---A-G-T--A------------------T---------------------GT---------------------------------A-------------------…	BcsFra39	BcsFra38	Bacteroides fragilis
>000011024|size:251	0.0125613	95.2%:EnrCl529;95.2%:EnrCl528		CC-T-AC-G-G-G-A-G-GC--A-GCA-G-T-G-G-G-G-A-A--TA-TT--GC-A-C---AA-T-G-G--GC--GC-A-A--G-C--C-T-GA-T-G-C-A--GC-C--------A--T-GCC-G-C-G-T---------G-T-A--T--GA-A-G--A-A-G-G-CC----TT-CG-----------G-G-T--------T-G-T--A---AA-G-T-AC------------------------------TT-TC-A-G--C-GGG----G--A-G--G---AA--GGT-G---T-T-G--A-G--G----------T--T---------------------AA---------------------------------T---A----A-------CC-…	EnrCl529	EnrCl528	Enterobacter cloacae
>000013825|size:1614	0.0125274	96.5%:AauSpec5;96.5%:AauSpeci		CC-T-AC-G-G-G-A-G-GC--A-GCA-G-T-G-G-G-G-A-A--TT-TT--GC-A-C---AA-T-G-G--GG--GA-A-A--C-C--C-T-GA-T-G-C-A--GC-G--------A--C-GCC-G-C-G-T---------G-A-T--T--TA---G--A-A-G-G-CC----TT-CG-----------G-G-T--------T-G-T--A---AA-A-A-TC------------------------------TT-TT-G-T--A-TAG----G--A-A--G---A-------------------------------------A---------------------AA-----------------------------------------------------…	AauSpec5	AauSpeci	Anaerococcus provencensis
>000011234|size:625	0.0123683	96.5%:StaWar47;96.5%:AciBa511		CC-T-AC-G-G-G-A-G-GC--A-GCA-G-T-A-G-G-G-A-A--TC-TT--CC-G-C---AA-T-G-G--GC--GA-A-A--G-C--C-T-GA-C-G-G-A--GC-A--------A--C-GCC-G-C-G-T---------G-A-G--T--GA-T-G--A-A-G-G-TC----TT-CG-----------G-A-T--------C-G-T--A---AA-A-C-TC------------------------------TG-TT-A-T--C-AGG----G--A-A--G---AA-CAAA-T---G-T-G--T-A--A----------G--T---------------------AA---------------------------------C--------T-------GT-…	StaWar47	AciBa511	Staphylococcus warneri
>000013322|size:1091	0.012365	98.0%:KleP1011;98.0%:KlePn949		CC-T-AC-G-G-G-A-G-GC--A-GCA-G-T-G-G-G-G-A-A--TA-TT--GC-A-C---AA-T-G-G--GC--GC-A-A--G-C--C-T-GA-T-G-C-A--GC-C--------A--T-GCC-G-C-G-T---------G-T-G--T--GA-A-G--A-A-G-G-CC----TT-CG-----------G-G-T--------T-G-T--A---AA-G-C-AC------------------------------TT-TC-A-G--C-GGG----G--A-G--G---AA--GGC-G---A-T-A--A-G--G----------T--T---------------------AA---------------------------------T---A----A-------CC-…	KleP1011	KlePn949	Klebsiella pneumoniae
>000013642|size:929	0.0123356	95.2%:PntAn107;95.2%:PntAn106		CC-T-AC-G-G-G-A-G-GC--A-GCA-G-T-G-G-G-G-A-A--TA-TT--GC-A-C---AA-T-G-G--GC--GC-A-A--G-C--C-T-GA-T-G-C-A--GC-C--------A--T-GCC-G-C-G-T---------G-T-A--T--GA-A-G--A-A-G-G-CC----TT-CG-----------G-G-T--------T-G-T--A---AA-G-T-AC------------------------------TT-TC-A-G--C-GGG----G--A-G--G---AA--GGC-G---A-T-G--T-G--G----------T--T---------------------AA---------------------------------T---A----A-------CC-…	PntAn107	PntAn106	Pantoea ananatis
>000002536|size:725	0.0122495	98.0%:StaAu564;98.0%:EntFa534		C--T-AC-G-G-G-A-G-GC--A-GCA-G-T-A-G-G-G-A-A--TC-TT--CG-G-C---AA-T-G-G--AC--GA-A-A--G-T--C-T-GA-C-C-G-A--GC-A--------A--C-GCC-G-C-G-T---------G-A-G--T--GA-A-G--A-A-G-G-TT----TT-CG-----------G-A-T--------C-G-T--A---AA-A-C-TC------------------------------TG-TT-G-T--T-AGA----G--A-A--G---AA-CAAG-G---A-C-G--T-T--A----------G--T---------------------AA---------------------------------C--------T-------GA-…	StaAu564	EntFa534	Enterococcus faecalis
>000010275|size:609	0.0121783	94.1%:StaAu564;94.1%:EntFa534		CC-T-AC-G-G-G-A-G-GC--A-GCA-G-T-A-G-G-G-A-A--TC-TT--CG-G-C---AA-T-G-G--AC--GA-A-A--G-T--C-T-GA-C-C-G-A--GC-A--------A--C-GCC-G-C-G-T---------G-A-G--T--GA-A-G--A-A-G-G-TT----TT-CG-----------G-A-T--------C-G-T--A---AA-A-C-TC------------------------------TG-TT-G-T--T-AGA----G--A-A--G---AA-CAAG-G---A-C-G--T-T--A----------G--T---------------------AA---------------------------------C--------T-------GA-…	StaAu564	EntFa534	Enterococcus faecalis
>000011794|size:985	0.0121269	96.7%:LacIner5;96.7%:LacIner4	Lactobacillus iners	CC-T-AC-G-G-G-A-G-GC--A-GCA-G-T-A-G-G-G-A-A--TC-TT--CC-A-C---AA-T-G-G--AC--GC-A-A--G-T--C-T-GA-T-G-G-A--GC-A--------A--C-GCC-G-C-G-T---------G-A-G--T--GA-A-G--A-A-G-G-GT----TT-CG-----------G-C-T--------C-G-T--A---AA-G-C-TC------------------------------TG-TT-G-T--T-GGT----G--A-A--G---AA-GGAC-A---G-G-G--G-T--A----------G--T---------------------AA---------------------------------C--------T-------GA-…	LacIner5	LacIner4	Lactobacillus iners
>000011825|size:670	0.0121204	96.7%:Esch1620;96.7%:Esch1481		CC-T-AC-G-G-G-A-G-GC--A-GCA-G-T-G-G-G-G-A-A--TA-TT--GC-A-C---AA-T-G-G--GC--GC-A-A--G-C--C-T-GA-T-G-C-A--GC-C--------A--T-GCC-G-C-G-T---------G-T-A--T--GA-A-G--A-A-G-G-CC----TT-CG-----------G-G-T--------T-G-T--A---AA-G-T-AC------------------------------TT-TC-A-G--C-GAG----G--A-G--G---AA--GGC-A---T-T-A--A-G--G----------T--T---------------------AA---------------------------------T---A----A-------CC-…	Esch1620	Esch1481	Escherichia/Shigella
>000005031|size:593	0.0121199	94.1%:StaEp122;94.1%:StaCap17		CC-T-AC-G-G-G-A-G-GC--A-GCA-G-T-A-G-G-G-A-A--TC-TT--CC-G-C---AA-T-G-G--GC--GA-A-A--G-C--C-T-GA-C-G-G-A--GC-A--------A--C-GCC-G-C-G-T---------G-A-G--T--GA-A-G--A-A-G-G-TC----TT-CG-----------G-A-T--------A-G-T--A---AA-A-C-TC------------------------------TG-TT-A-T--T-AGG----G--A-A--G---AA-CAAA-T---G-T-G--T-A--A----------G--T---------------------AA---------------------------------C--------T-------AT-…	StaEp122	StaCap17	Staphylococcus epidermidis
>000005938|size:678	0.0121175	96.7%:KleOx208;96.7%:KleOx207		CC-T-AC-G-G-G-A-G-GC--A-GCA-G-T-G-G-G-G-A-A--TA-TT--GC-A-C---AA-T-G-G--GC--GC-A-A--G-C--C-T-GA-T-G-C-A--GC-C--------A--T-GCC-G-C-G-T---------G-T-A--T--GA-A-G--A-A-G-G-CC----TT-CG-----------G-G-T--------T-G-T--A---AA-G-T-AC------------------------------TT-TC-A-G--C-GGG----G--A-G--G---AA--GGG-A---G-T-G--A-G--G----------T--T---------------------AA---------------------------------T---A----A-------CC-…	KleOx208	KleOx207	Klebsiella oxytoca
>000002157|size:688	0.0120997	91.4%:CrvLanc2;91.4%:CrvLance		CC-T-AC-G-G-G-A-G-GC--A-GCA-G-T-G-G-G-G-A-A--TT-TT--GG-A-C---AA-T-G-G--GC--GA-A-A--G-C--C-T-GA-T-C-C-A--GC-C--------A--T-GCC-G-C-G-T---------G-C-A--G--GA-T-G--A-A-G-G-CC----TT-CG-----------G-G-T--------T-G-T--A---AA-C-T-GC------------------------------TT-TT-G-T--A-CGG----A--A-C--G---AA--AAG-G---T-T-T--G-G--C----------C--T---------------------AA---------------------------------T---A----A-------GC-…	CrvLanc2	CrvLance	Curvibacter lanceolatus
>000012056|size:744	0.0120463	97.1%:StaEpi99;97.1%:StaEpi80		CC-T-AC-G-G-G-A-G-GC--A-GCA-G-T-A-G-G-G-A-A--TC-TT--CC-G-C---AA-T-G-G--GC--GA-A-A--G-C--T-T-GA-C-G-G-A--GC-A--------A--C-GCC-G-C-G-T---------G-A-G--T--GA-T-G--A-A-G-G-TC----TT-CG-----------G-A-T--------C-G-T--A---AA-A-C-TC------------------------------TG-TT-A-T--T-AGG----G--A-A--G---AA-CAAA-T---G-T-G--T-A--A----------G--T---------------------AA---------------------------------C--------T-------AT-…	StaEpi99	StaEpi80	Staphylococcus epidermidis
>000012079|size:663	0.0120355	96.7%:StaEp124;96.7%:StaEp123		CC-T-AA-G-G-G-A-G-GC--A-GCA-G-T-A-G-G-G-A-A--TC-TT--CC-G-C---AA-T-G-G--GC--GA-A-A--G-C--C-T-GA-C-G-G-A--GC-A--------A--C-GCC-G-C-G-T---------G-A-G--T--GA-T-G--A-A-G-G-TC----TT-CG-----------G-A-T--------C-G-T--A---AA-A-C-TC------------------------------TG-TT-A-T--T-AGG----G--A-A--G---AA-CAAA-T---G-T-G--T-A--A----------G--T---------------------AA---------------------------------C--------T-------AT-…	StaEp124	StaEp123	Staphylococcus epidermidis
>000012975|size:988	0.0118203	95.4%:EnrCl527;95.4%:EnrCl526		CC-T-AC-G-G-G-A-G-GC--A-GCA-G-T-G-G-G-G-A-A--TA-TT--GC-A-C---AA-T-G-G--GC--GC-A-A--G-C--C-T-GA-T-G-C-A--GC-C--------A--T-GCC-G-C-G-T---------G-T-A--T--GA-A-G--A-A-G-G-CC----TT-CG-----------G-G-T--------T-G-T--A---AA-G-T-AC------------------------------TT-TC-A-G--C-GGG----G--A-G--G---AA--GGC-G---A-T-A--A-G--G----------T--T---------------------AA---------------------------------T---A----A-------CC-…	EnrCl527	EnrCl526	Enterobacter cloacae
>000003544|size:784	0.011761	96.7%:VeiSpe35;96.7%:VeiSpe33		CC-T-AC-G-G-G-A-G-GC--A-GCA-G-T-G-G-G-G-A-A--TC-TT--CC-G-C---AA-T-G-G--AC--GA-A-A--G-T--C-T-GA-C-G-G-A--GC-A--------A--C-GCC-G-C-G-T---------G-A-G--T--GA-T-G--A-C-G-G-CC----TT-CG-----------G-G-T--------T-G-T--A---AA-G-C-TC------------------------------TG-TT-A-A--T-CGG----G--A-C--G---AA-AGGC-C---T-T-C--T-T--G----------C--G---------------------AA---------------------------------T---A----G-------TG-…	VeiSpe35	VeiSpe33	Veillonella parvula
>000009436|size:510	0.0115363	91.4%:BcsFra39;91.4%:BcsFra38		CC-T-AC-G-G-G-A-G-GC--A-GCA-G-T-G-C-G-G-A-A--TA-TT--GG-T-C---AA-T-G-G--GC--GC-T-A--G-C--C-T-GA-A-C-C-A--GC-C--------A--C-GTA-G-C-G-T---------G-A-A--G--GA-T-G--A-A-G-G-CT-C--TA-TG-----------G-G-T--------C-G-T--A---AA-C-T-TC------------------------------TT-TT-A-T--A-TAA----G--A-A--T---AA-AGTG-C---A-G-T--A------------------T---------------------GT---------------------------------A-------------------…	BcsFra39	BcsFra38	Bacteroides fragilis
>000010220|size:826	0.0114938	92.5%:StaAu564;92.5%:EntFa534		CC-T-AC-G-G-G-A-G-GC--A-GCA-G-T-A-G-G-G-A-A--TC-TT--CG-G-C---AA-T-G-G--GG--GC-A-A--C-C--C-T-GA-C-C-G-A--GC-A--------A--C-GCC-G-C-G-T---------G-A-G--T--GA-A-G--A-A-G-G-TT----TT-CG-----------G-A-T--------C-G-T--A---AA-A-C-TC------------------------------TG-TT-G-T--T-AGA----G--A-A--G---AA-CAAG-G---A-C-G--T-T--A----------G--T---------------------AA---------------------------------C--------T-------GA-…	StaAu564	EntFa534	Enterococcus faecalis
>000008185|size:764	0.0114867	99.8%:ClsPer86;99.8%:ClsPer59		CC-T-AC-G-G-G-A-G-GC--A-GCA-G-T-G-G-G-G-A-A--TA-TT--GC-A-C---AA-T-G-G--GG--GA-A-A--C-C--C-T-GA-T-G-C-A--GC-A--------A--C-GCC-G-C-G-T---------G-A-G--T--GA-T-G--A-A-G-G-TT----TT-CG-----------G-A-T--------C-G-T--A---AA-G-C-TC------------------------------TG-TC-T-T--T-GGG----G--A-A--G---A-------------------------------------T---------------------AA-----------------------------------------------------…	ClsPer86	ClsPer59	Clostridium perfringens
>000013896|size:702	0.0113698	96.5%:PpcDi105;96.5%:PpcDi102		CC-T-AC-G-G-G-A-G-GC--A-GCA-G-T-G-G-G-G-A-A--TA-TT--GC-A-C---AA-T-G-G--GC--GA-A-A--G-C--C-T-GA-T-G-C-A--GC-A--------A--C-GCC-G-C-G-T---------G-A-G--T--GA-T-G--A-A-G-G-CC----TT-CG-----------G-G-T--------C-G-T--A---AA-A-C-TC------------------------------TG-TC-C-T--C-AAG----G--A-A--G---A-------------------------------------T---------------------AA-----------------------------------------------------…	PpcDi105	PpcDi102	Clostridioides difficile
>000009487|size:498	0.0113517	91.4%:BcsFra39;91.4%:BcsFra38		CC-T-AC-G-G-G-A-G-GC--A-GCA-G-T-G-A-G-G-A-A--TA-TT--GG-T-C---AA-T-G-G--GC--GC-T-A--G-C--C-T-GA-A-C-C-A--GC-C--------A--A-GTC-G-C-G-T---------G-A-A--G--GA-T-G--A-A-G-G-CT-C--TA-TG-----------G-G-T--------C-G-T--A---AA-C-T-TC------------------------------TT-TT-A-T--A-TAA----G--A-A--T---AA-AGTG-C---A-G-T--A------------------T---------------------GT---------------------------------A-------------------…	BcsFra39	BcsFra38	Bacteroides fragilis
>000014747|size:615	0.0113343	96.9%:KleOxy31;96.7%:KleOx242		CC-T-AC-G-G-G-A-G-GC--A-GCA-G-T-G-G-G-G-A-A--TA-TT--GC-A-C---AA-T-G-G--GC--GC-A-A--G-C--C-T-GA-T-G-C-A--GC-C--------A--T-GCC-G-C-G-T---------G-T-A--T--GA-A-G--A-A-G-G-CC----TT-CG-----------G-G-T--------T-G-T--A---AA-G-T-AC------------------------------TT-TC-A-G--C-GGG----G--A-G--G---AA--GGC-G---A-T-A--A-G--G----------T--T---------------------AA---------------------------------T---A----A-------CC-…	KleOxy31	KleOx242	Klebsiella oxytoca
>000010313|size:775	0.0113293	97.8%:StaAu564;97.8%:EntFa534		C--T-AC-G-G-G-A-G-GC--A-GCA-G-T-A-G-G-G-A-A--TC-TT--CG-G-C---AA-T-G-G--AC--GA-A-A--G-T--C-T-GA-C-C-G-A--GC-A--------A--C-GCC-G-C-G-T---------G-A-G--T--GA-A-G--A-A-G-G-TT----TT-CG-----------G-A-T--------C-G-T--A---AA-A-C-TC------------------------------TG-TT-G-T--T-AGA----G--A-A--G---AA-CAAG-G---A-C-G--T-T--A----------G--T---------------------AA---------------------------------C--------T-------GA-…	StaAu564	EntFa534	Enterococcus faecalis
>000008055|size:664	0.0113007	95.1%:ClsPer92;95.1%:ClsPer91		CC-T-AC-G-G-G-A-G-GC--A-GCA-G-T-G-G-G-G-A-A--TA-TT--GC-A-C---AA-T-G-G--GG--GA-A-A--C-C--C-T-GA-T-G-C-A--GC-A--------A--C-GCC-G-C-G-T---------G-A-G--T--GA-T-G--A-A-G-G-TT----TT-CG-----------G-A-T--------C-G-T--A---AA-G-C-TC------------------------------TG-TC-T-T--T-GGG----G--A-A--G---A-------------------------------------T---------------------AA-----------------------------------------------------…	ClsPer92	ClsPer91	Clostridium perfringens
>000011886|size:921	0.0112443	97.8%:VeiDisp6;97.8%:VeiDisp5		CC-T-AC-G-G-G-A-G-GC--A-GCA-G-T-G-G-G-G-A-A--TC-TT--CC-G-C---AA-T-G-G--AC--GA-A-A--G-T--C-T-GA-C-G-G-A--GC-A--------A--C-GCC-G-C-G-T---------G-A-G--T--GA-T-G--A-C-G-G-CC----TT-CG-----------G-G-T--------T-G-T--A---AA-G-C-TC------------------------------TG-TT-A-A--T-CGG----G--A-C--G---AA-AGGC-C---T-T-C--T-T--G----------C--G---------------------AA---------------------------------T---A----G-------TT-…	VeiDisp6	VeiDisp5	Veillonella dispar
>000001378|size:572	0.0112161	96.5%:MtlExt42;96.5%:MtlExt41	Methylorubrum extorquens	CC-T-AC-G-G-G-A-G-GC--A-GCA-G-T-G-G-G-G-A-A--TA-TT--GG-A-C---AA-T-G-G--GC--GC-A-A--G-C--C-T-GA-T-C-C-A--GC-C--------A--T-GCC-G-C-G-T---------G-A-G--T--GA-T-G--A-A-G-G-CC----TT-AG-----------G-G-T--------T-G-T--A---AA-G-C-TC------------------------------TT-TT-G-T--C-CGG----G--A-C--G---A-------------------------------------T---------------------AA-----------------------------------------------------…	MtlExt42	MtlExt41	Methylorubrum extorquens
>000009419|size:1131	0.0111701	94.0%:BcsFra39;94.0%:BcsFra38		CC-T-AC-G-G-G-A-G-GC--A-GCA-G-T-G-A-G-G-A-A--TA-TT--GG-T-C---AA-T-G-G--GC--GC-T-A--G-C--C-T-GA-C-C-C-A--GC-C--------A--A-GTA-G-C-G-T---------G-A-A--G--GA-T-G--A-A-G-G-CT-C--TA-TG-----------G-G-T--------C-G-T--A---AA-C-T-TC------------------------------TT-TT-A-T--A-TAA----G--A-A--T---AA-AGTG-C---A-G-T--A------------------T---------------------GT---------------------------------A-------------------…	BcsFra39	BcsFra38	Bacteroides fragilis
>000007855|size:478	0.0111102	96.5%:PpuAsac4;96.5%:PpuGross		CC-T-AC-G-G-G-A-G-GC--A-GCA-G-T-G-G-G-G-A-A--TA-TT--GC-A-C---AA-T-G-G--AG--GG-A-A--C-T--C-T-GA-T-G-C-A--GC-G--------A--C-GCC-G-C-G-T---------G-A-A--C--GA-A-G--A-A-G-G-CT----TT-CG-----------A-G-T--------C-G-T--A---AA-G-T-TC------------------------------TT-TT-A-T--A-TGG----G--A-A--G---A-------------------------------------T---------------------AA-----------------------------------------------------…	PpuAsac4	PpuGross	Peptoniphilus asaccharolyticus
>000009472|size:3630	0.0110102	94.0%:BcsFra39;94.0%:BcsFra38		CC-T-AC-G-G-G-A-G-GC--A-GCA-G-T-G-A-G-G-A-A--TA-TT--GG-T-C---AA-T-G-G--GC--GC-T-A--G-C--C-T-GA-A-C-C-A--GC-C--------A--A-GTA-G-C-G-T---------G-A-A--G--GA-T-G--A-A-G-G-CT-C--TA-TG-----------G-G-T--------C-G-T--A---AA-C-T-TC------------------------------TT-TT-A-T--A-TAA----G--A-A--T---AA-AGTG-C---A-G-T--A------------------T---------------------GT---------------------------------A-------------------…	BcsFra39	BcsFra38	Bacteroides fragilis
>000003948|size:648	0.0109539	96.7%:PbdMerd5;96.7%:PbdMerd4	Parabacteroides merdae	CC-T-AC-G-G-G-A-G-GC--A-GCA-G-T-G-A-G-G-A-A--TA-TT--GG-T-C---AA-T-G-G--CC--GA-G-A--G-G--C-T-GA-A-C-C-A--GC-C--------A--A-GTC-G-C-G-T---------G-A-A--G--GA-A-G--A-A-G-G-AT-C--TA-TG-----------G-T-T--------T-G-T--A---AA-C-T-TC------------------------------TT-TT-A-T--A-GGG----G--A-A--T---AA-AGTG-G---A-G-G--A------------------C---------------------GT---------------------------------G-------------------…	PbdMerd5	PbdMerd4	Parabacteroides merdae
>000013643|size:571	0.0109488	97.8%:KleP1002;97.8%:KlePn925		CC-T-AC-G-G-G-A-G-GC--A-GCA-G-T-G-G-G-G-A-A--TA-TT--GC-A-C---AA-T-G-G--GC--GC-A-A--G-C--C-T-GA-T-G-C-A--GC-C--------A--T-GCC-G-C-G-T---------G-T-G--T--GA-A-G--A-A-G-G-CC----TT-CG-----------G-G-T--------T-G-T--A---AA-G-C-AC------------------------------TT-TC-A-G--C-GGG----G--A-G--G---AA--GGC-G---A-T-A--A-G--G----------T--T---------------------AA---------------------------------T---A----A-------CC-…	KleP1002	KlePn925	Klebsiella pneumoniae
>000008530|size:593	0.0109158	97.7%:CabSubvi;97.7%:CabSpe93	Sphingomonas kyeonggiensis	CC-T-AC-G-G-G-A-G-GC--A-GCA-G-T-G-G-G-G-A-A--TA-TT--GG-A-C---AA-T-G-G--GC--GA-A-A--G-C--C-T-GA-T-C-C-A--GC-A--------A--T-GCC-G-C-G-T---------G-A-G--T--GA-T-G--A-A-G-G-CC----TT-AG-----------G-G-T--------T-G-T--A---AA-G-C-TC------------------------------TT-TT-A-C--C-CGG----G--A-T--G---A-------------------------------------T---------------------AA-----------------------------------------------------…	CabSubvi	CabSpe93	Sphingomonas kyeonggiensis
>000013324|size:776	0.0108914	94.1%:EnrCl527;94.1%:EnrCl526		CC-T-AC-G-G-G-A-G-GC--A-GCA-G-T-G-G-G-G-A-A--TA-TT--GC-A-C---AA-T-G-G--GC--GC-A-A--G-C--C-T-GA-T-G-C-A--GC-C--------A--T-GCC-G-C-G-T---------G-T---AT--GA-A-G--A-A-G-G-CC----TT-CG-----------G-G-T--------T-G-T--A---AA-G-C-AC------------------------------TT-TC-A-G--C-GGG----G--A-G--G---AA--GGC-G---A-T-A--A-G--G----------T--T---------------------AA---------------------------------T---A----A-------CC-…	EnrCl527	EnrCl526	Enterobacter cloacae
>000003086|size:478	0.0108627	94.1%:UrpPar20;94.1%:UrpPar16	Ureaplasma parvum/urealyticum	CC-T-AC-G-G-G-A-G-GC--A-GCA-G-T-A-G-G-G-A-A--TT-TT--TC-A-C---AA-T-G-G--GC--GC-A-A--G-C--C-T-TA-T-G-A-A--GC-A--------A--T-GCC-G-C-G-T---------G-A-A--C--GA-T-G--A-A-G-G-TC----TTATA-----------G-A-T--------T-G-T--A---AA-G-T-TC------------------------------TT-TT-A-T--A-TGG----G--A-A--G---AA-ACGC-T---A-A-A--A-T--AG---------G--A---------------------AA------------------------------------------------T-GA-…	UrpPar20	UrpPar16	Ureaplasma parvum/urealyticum
>000007373|size:556	0.0108282	96.7%:KleP1014;96.7%:KleP1012		CC-T-AC-G-G-G-A-G-GC--A-GCA-G-T-G-G-G-G-A-A--TA-TT--GC-A-C---AA-T-G-G--GC--GC-A-A--G-C--C-T-GA-T-G-C-A--GC-C--------A--T-GCC-G-C-G-T---------G-T-G--T--GA-A-G--A-A-G-G-CC----TT-CG-----------G-G-T--------T-G-T--A---AA-G-C-AC------------------------------TT-TC-A-G--C-GGG----G--A-G--G---AA--GGC-G---T-T-A--A-G--G----------T--T---------------------AA---------------------------------T---A----A-------CC-…	KleP1014	KleP1012	Klebsiella pneumoniae
>000007402|size:582	0.0108118	97.8%:KleVar40;97.8%:KlePn961		CC-T-AC-G-G-G-A-G-GC--A-GCA-G-T-G-G-G-G-A-A--TA-TT--GC-A-C---AA-T-G-G--GC--GC-A-A--G-C--C-T-GA-T-G-C-A--GC-C--------A--T-GCC-G-C-G-T---------G-T-G--T--GA-A-G--A-A-G-G-CC----TT-CG-----------G-G-T--------T-G-T--A---AA-G-C-AC------------------------------TT-TC-A-G--C-GGG----G--A-G--G---AA--GGC-G---G-T-G--A-G--G----------T--T---------------------AA---------------------------------T---A----A-------CC-…	KleVar40	KlePn961	Klebsiella pneumoniae
>000007714|size:730	0.0108108	94.9%:ClsPar22;94.9%:ClsPar21		CC-T-AC-G-G-G-A-G-GC--A-GCA-G-T-G-G-G-G-A-A--TA-TT--GC-A-C---AA-T-G-G--GG--GA-A-A--C-C--C-T-GA-T-G-C-A--GC-A--------A--C-GCC-G-C-G-T---------G-A-G--T--GA-T-G--A-C-G-G-CC----TT-CG-----------G-G-T--------T-G-T--A---AA-G-C-TC------------------------------TG-TC-T-T--T-GGG----G--A-C--G---A-------------------------------------T---------------------AA-----------------------------------------------------…	ClsPar22	ClsPar21	Clostridium paraputrificum
>000007835|size:679	0.0107405	96.5%:PpuRhini;96.5%:PpuGorba		CC-T-AC-G-G-G-A-G-GC--A-GCA-G-T-G-G-G-G-A-A--TA-TT--GC-A-C---AA-T-G-G--AG--GG-A-A--C-T--C-T-GA-T-G-C-A--GC-G--------A--C-GCC-G-C-G-T---------G-A-A--C--GA-A-G--A-A-G-G-CT----TT-CG-----------A-G-T--------C-G-T--A---AA-G-T-TC------------------------------TT-TT-A-T--A-TGG----G--A-A--G---A-------------------------------------T---------------------AA-----------------------------------------------------…	PpuRhini	PpuGorba	Peptoniphilus gorbachii
>000013918|size:300	0.0106923	96.5%:CabSubvi;96.5%:CabSpe93		CC-T-AC-G-G-G-A-G-GC--A-GCA-G-T-G-G-G-G-A-A--TA-TT--GG-A-C---AA-T-G-G--GC--GA-A-A--G-C--C-T-GA-T-C-C-A--GC-A--------A--T-GCC-G-C-G-T---------G-A-G--T--GA-T-G--A-A-G-G-CC----TT-AG-----------G-G-T--------T-G-T--A---AA-G-C-TC------------------------------TT-TT-A-C--C-CGG----G--A-T--G---A-------------------------------------T---------------------AA-----------------------------------------------------…	CabSubvi	CabSpe93	Sphingomonas kyeonggiensis
>000010127|size:462	0.0106644	94.1%:UndOligo;87.5%:BacPH120		CC-T-AC-G-G-G-A-G-GC--A-GCA-G-T-G-G-G-G-A-A--TT-TT--GG-A-C---AA-T-G-G--GG--GC-A-A--C-C--C-T-GA-T-C-C-A--GC-A--------A--T-GCC-G-C-G-T---------G-A-G--T--GA-A-G--A-A-G-G-CC----CT-CG-----------G-G-T--------T-G-T--A---AA-G-C-TC------------------------------TT-TT-G-T--C-AGG----G--A-A--G---AA--ACG-G---A-G-T--T-C--T----------C--T---------------------AA---------------------------------T---A----T-------AG-…	UndOligo	BacPH120	Undibacterium oligocarboniphilum
>000009164|size:423	0.0106095	91.0%:FaeSpeci;91.0%:FaePrau4	Faecalibacterium prausnitzii	CC-T-AC-G-G-G-A-G-GC--A-GCA-G-T-G-G-G-G-A-A--TA-TT--GC-A-C---AA-T-G-G--GG--GA-A-A--C-C--C-T-GA-T-G-C-A--GC-G--------A--C-GCC-G-C-G-T---------G-G-A--G--GA-A-G--A-A-G-G-TC----TT-CG-----------G-A-T--------T-G-T--A---AA-C-T-CC------------------------------TG-TT-G-T--T-GAG----G--A-A--G---A-------------------------------------T---------------------AA-----------------------------------------------------…	FaeSpeci	FaePrau4	Faecalibacterium prausnitzii
>000013758|size:647	0.0105296	96.5%:ClsPar22;96.5%:ClsPar21		CC-T-AC-G-G-G-A-G-GC--A-GCA-G-T-G-G-G-G-A-A--TA-TT--GC-A-C---AA-T-G-G--GG--GA-A-A--C-C--C-T-GA-T-G-C-A--GC-A--------A--C-GCC-G-C-G-T---------G-A-G--T--GA-T-G--A-C-G-G-CC----TT-CG-----------G-G-T--------T-G-T--A---AA-G-C-TC------------------------------TG-TC-T-T--T-GGG----G--A-C--G---A-------------------------------------T---------------------AA-----------------------------------------------------…	ClsPar22	ClsPar21	Clostridium paraputrificum
>000011393|size:268	0.0105096	96.7%:KleOx236;96.7%:KleOxy14		CC-T-AC-G-G-G-A-G-GC--A-GCA-G-T-G-G-G-G-A-A--TA-TT--GC-A-C---AA-T-G-G--GC--GC-A-A--G-C--C-T-GA-T-G-C-A--GC-C--------A--T-GCC-G-C-G-T---------G-T-A--T--GA-A-G--A-A-G-G-CC----TT-CG-----------G-G-T--------T-G-T--A---AA-G-T-AC------------------------------TT-TC-A-G--C-GGG----G--A-G--G---AA--GGC-G---A-T-A--A-G--G----------T--T---------------------AA---------------------------------T---A----A-------CC-…	KleOx236	KleOxy14	Klebsiella oxytoca
>000014040|size:635	0.010447	96.7%:EntFa540;96.7%:EntFa539		CC-T-AC-G-G-G-A-G-GC--A-GCA-G-T-A-G-G-G-A-A--TC-TT--CG-G-C---AA-T-G-G--AC--GA-A-A--G-T--C-T-GA-C-C-G-A--GC-A--------A--C-GCC-G-C-G-T---------G-A-G--T--GA-A-G--A-A-G-G-TT----TT-CG-----------G-A-T--------C-G-T--A---AA-A-C-TC------------------------------TG-TT-G-T--T-AGA----G--A-A--G---AA-CAAG-G---A-T-G--A-G--A----------G--T---------------------AA---------------------------------C--------T-------GT-…	EntFa540	EntFa539	Enterococcus faecium
>000007304|size:860	0.0104443	94.0%:BcsVul15;94.0%:BcsVul14		CC-T-AC-G-G-G-A-G-GC--A-GCA-G-T-G-A-G-G-A-A--TA-TT--GG-T-C---AA-T-G-G--GC--GA-G-A--G-C--C-T-GA-C-C-C-A--GC-C--------A--A-GTA-G-C-G-T---------G-A-A--G--GA-T-G--A-C-T-G-CC-C--TA-TG-----------G-G-T--------T-G-T--A---AA-C-T-TC------------------------------TT-TT-A-T--A-AAG----G--A-A--T---AA-AGTC-G---G-G-T--A------------------T---------------------GG---------------------------------A-------------------…	BcsVul15	BcsVul14	Bacteroides vulgatus
>000002692|size:711	0.0104191	96.7%:KleOx234;96.7%:KleOx231		CC-T-AC-G-G-G-A-G-GC--A-GCA-G-T-G-G-G-G-A-A--TA-TT--GC-A-C---AA-T-G-G--GC--GC-A-A--G-C--C-T-GA-T-G-C-A--GC-C--------A--T-GCC-G-C-G-T---------G-T-A--T--GA-A-G--A-A-G-G-CC----TT-CG-----------G-G-T--------T-G-T--A---AA-G-T-AC------------------------------TT-TC-A-G--C-GGG----G--A-G--G---AA--GGT-G---T-T-G--A-G--G----------T--T---------------------AA---------------------------------T---A----A-------CC-…	KleOx234	KleOx231	Klebsiella oxytoca
>000010136|size:523	0.0103873	92.5%:CrvLanc2;92.5%:CrvLance		CC-T-AC-G-G-G-A-G-GC--A-GCA-G-T-G-G-G-G-A-A--TT-TT--GG-A-C---AA-T-G-G--GC--GA-A-A--G-C--C-T-GA-T-C-C-A--GC-C--------A--T-GCC-G-C-G-T---------G-C-A--G--GA-T-G--A-A-G-G-CC----TT-CG-----------G-G-T--------T-G-T--A---AA-C-T-GC------------------------------TT-TT-G-T--A-CGG----A--A-C--G---AA--AAG-G---T-T-T--G-G--C----------C--T---------------------AA---------------------------------T---A----A-------GC-…	CrvLanc2	CrvLance	Curvibacter lanceolatus
>000000890|size:544	0.0103867	67.6%:CorXer22;67.6%:CorFre19		CC-T-AC-G-G-G-A-G-GC--A-GCA-G-T-G-G-G-G-A-A--TA-TT--GC-A-C---AA-T-G-G--GC--GC-A-A--G-C--C-T-GA-T-G-C-A--GC-G--------A--C-GCC-G-C-G-T---------G-G-G--G--GA-T-G--A-C-G-G-CC----TT-CG-----------G-G-T--------T-G-T--A---AA-C-T-CC------------------------------TT-TC-A-G--C-CAT----G--A-C--G---AA--GCC-------------------------------CT--------------------TG---------------------------------TGG-----------------…	CorXer22	CorFre19	Corynebacterium kroppenstedtii
>000008168|size:452	0.010386	93.7%:ClsPer86;93.7%:ClsPer59		CC-T-AC-G-G-G-A-G-GC--A-GCA-G-T-G-G-G-G-A-A--TA-TT--GC-A-C---AA-T-G-G--GG--GA-A-A--C-C--C-T-GA-T-G-C-A--GC-A--------A--C-GCC-G-C-G-T---------G-A-G--T--GA-T-G--A-A-G-G-TT----TT-CG-----------G-A-T--------C-G-T--A---AA-G-C-TC------------------------------TG-TC-T-T--T-GGG----G--A-A--G---A-------------------------------------T---------------------AA-----------------------------------------------------…	ClsPer86	ClsPer59	Clostridium perfringens
>000014816|size:777	0.0103756	95.2%:KleOx242;95.2%:KleOx241		CC-T-AC-G-G-G-A-G-GC--A-GCA-G-T-G-G-G-G-A-A--TA-TT--GC-A-C---AA-T-G-G--GC--GC-A-A--G-C--C-T-GA-T-G-C-A--GC-C--------A--T-GCC-G-C-G-T---------G-T-A--T--GA-A-G--A-A-G-G-CC----TT-CG-----------G-G-T--------T-G-T--A---AA-G-T-AC------------------------------TT-TC-A-G--C-GGG----G--A-G--G---AA--GGC-G---A-T-A--A-G--G----------T--T---------------------AA---------------------------------T---A----A-------CC-…	KleOx242	KleOx241	Klebsiella oxytoca
>000002689|size:670	0.0103484	99.8%:EnrCl529;99.8%:EnrCl528		CC-T-AC-G-G-G-A-G-GC--A-GCA-G-T-G-G-G-G-A-A--TA-TT--GC-A-C---AA-T-G-G--GC--GC-A-A--G-C--C-T-GA-T-G-C-A--GC-C--------A--T-GCC-G-C-G-T---------G-T-A--T--GA-A-G--A-A-G-G-CC----TT-CG-----------G-G-T--------T-G-T--A---AA-G-T-AC------------------------------TT-TC-A-G--C-GGG----G--A-G--G---AA--GGT-G---T-T-G--A-G--G----------T--T---------------------AA---------------------------------T---A----A-------CC-…	EnrCl529	EnrCl528	Enterobacter cloacae
>000010196|size:420	0.0103046	95.2%:SttSa536;95.2%:SttSa535		CC-T-AC-G-G-G-A-G-GC--A-GCA-G-T-A-G-G-G-A-A--TC-TT--CG-G-C---AA-T-G-G--GG--GC-A-A--C-C--C-T-GA-C-C-G-A--GC-A--------A--C-GCC-G-C-G-T---------G-A-G--T--GA-A-G--A-A-G-G-TT----TT-CG-----------G-A-T--------C-G-T--A---AA-G-C-TC------------------------------TG-TT-G-T--C-AGT----C--A-A--G---AA-CGAG-T---G-T-G--A-G--A----------G--T---------------------GG---------------------------------A---A----A-------GT-…	SttSa536	SttSa535	Streptococcus salivarius
>000007143|size:821	0.010293	99.8%:BcsDor17;99.8%:BcsDor16		CC-T-AC-G-G-G-A-G-GC--A-GCA-G-T-G-A-G-G-A-A--TA-TT--GG-T-C---AA-T-G-G--GC--GA-T-G--G-C--C-T-GA-A-C-C-A--GC-C--------A--A-GTA-G-C-G-T---------G-A-A--G--GA-T-G--A-C-T-G-CC-C--TA-TG-----------G-G-T--------T-G-T--A---AA-C-T-TC------------------------------TT-TT-A-T--A-AAG----G--A-A--T---AA-AGTC-G---G-G-T--A------------------T---------------------GC---------------------------------A-------------------…	BcsDor17	BcsDor16	Bacteroides dorei
>000007042|size:533	0.0102884	97.1%:EnrAsb91;97.1%:EnrCl188		CC-T-AC-G-G-G-A-G-GC--A-GCA-G-T-G-G-G-G-A-A--TA-TT--GC-A-C---AA-T-G-G--GC--GC-A-A--G-C--C-T-GA-T-G-C-A--GC-C--------A--T-GCC-G-C-G-T---------G-T-A--T--GA-A-G--A-A-G-G-CC----TT-CG-----------G-G-T--------T-G-T--A---AA-G-T-AC------------------------------TT-TC-A-G--C-GGG----G--A-G--G---AA--GGC-G---G-T-G--A-G--G----------T--T---------------------AA---------------------------------T---A----A-------CC-…	EnrAsb91	EnrCl188	Enterobacter cloacae
>000003507|size:743	0.0102716	96.7%:VeiSpe35;96.7%:VeiSpe33		CC-T-AC-G-G-G-A-G-GC--A-GCA-G-T-G-G-G-G-A-A--TC-TT--CC-G-C---AA-T-G-G--AC--GA-A-A--G-T--C-T-GA-C-G-G-A--GC-A--------A--C-GCC-G-C-G-T---------G-A-G--T--GA-T-G--A-C-G-G-CC----TT-CG-----------G-G-T--------T-G-T--A---AA-G-C-TC------------------------------TG-TT-A-A--T-CGG----G--A-C--G---AA-AGGC-C---T-T-C--T-T--G----------C--G---------------------AA---------------------------------T---A----G-------TG-…	VeiSpe35	VeiSpe33	Veillonella parvula
>000013601|size:1022	0.0101929	95.2%:KleP1002;95.2%:KlePn925		CC-T-AC-G-G-G-A-G-GC--A-GCA-G-T-G-G-G-G-A-A--TA-TT--GC-A-C---AA-T-G-G--GC--GC-A-A--G-C--C-T-GA-T-G-C-A--GC-C--------A--T-GCC-G-C-G-T---------G-T-G--T--GA-A-G--A-A-G-G-CC----TT-CG-----------G-G-T--------T-G-T--A---AA-G-C-AC------------------------------TT-TC-A-G--C-GGG----G--A-G--G---AA--GGC-G---A-T-A--A-G--G----------T--T---------------------AA---------------------------------T---A----A-------CC-…	KleP1002	KlePn925	Klebsiella pneumoniae
>000013090|size:568	0.0101881	95.2%:EnrCl498;95.2%:EnrCl489		CC-T-AC-G-G-G-A-G-GC--A-GCA-G-T-G-G-G-G-A-A--TA-TT--GC-A-C---AA-T-G-G--GC--GC-A-A--G-C--C-T-GA-T-G-C-A--GC-C--------A--T-GCC-G-C-G-T---------G-T-A--T--GA-A-G--A-A-G-G-CC----TT-CG-----------G-G-T--------T-G-T--A---AA-G-T-AC------------------------------TT-TC-A-G--C-GGG----G--A-G--G---AA--GGC-G---A-C-A--G-G--G----------T--T---------------------AA---------------------------------T---A----A-------CC-…	EnrCl498	EnrCl489	Enterobacter cloacae
>000007234|size:613	0.0101848	95.3%:BcsVul15;95.3%:BcsVul14		CC-T-AC-G-G-G-A-G-GC--A-GCA-G-T-G-A-G-G-A-A--TA-TT--GG-T-C---AA-T-G-G--GC--GA-G-A--G-C--C-T-GA-A-C-C-A--GC-C--------A--A-GTA-G-C-G-T---------G-A-A--G--GA-T-G--A-C-T-G-CC-C--TA-TG-----------G-G-T--------T-G-T--A---AA-C-T-TC------------------------------TT-TT-A-T--A-AAG----G--A-A--T---AA-AGTC-G---G-G-T--A------------------T---------------------GC---------------------------------A-------------------…	BcsVul15	BcsVul14	Bacteroides vulgatus
>000008248|size:1001	0.0101682	93.7%:AauSpe17;93.7%:AauSpe16		CC-T-AC-G-G-G-A-G-GC--A-GCA-G-T-G-G-G-G-A-A--TT-TT--GC-A-C---AA-T-G-G--GG--GC-A-A--C-C--C-T-GA-T-G-C-A--GC-G--------A--C-GCC-G-C-G-T---------G-A-T--T--TA---G--A-A-G-G-CC----TT-CG-----------G-G-T--------T-G-T--A---AA-A-A-TC------------------------------TT-TT-G-T--A-TAG----G--A-A--G---A-------------------------------------A---------------------AA-----------------------------------------------------…	AauSpe17	AauSpe16	Anaerococcus provencensis
>000013813|size:446	0.0101379	96.5%:ClsPer92;96.5%:ClsPer91		CC-T-AC-G-G-G-A-G-GC--A-GCA-G-T-G-G-G-G-A-A--TA-TT--GC-A-C---AA-T-G-G--GG--GA-A-A--C-C--C-T-GA-T-G-C-A--GC-A--------A--C-GCC-G-C-G-T---------G-A-G--T--GA-T-G--A-A-G-G-TT----TT-CG-----------G-A-T--------C-G-T--A---AA-G-C-TC------------------------------TG-TC-T-T--T-GGG----G--A-A--G---A-------------------------------------T---------------------AA-----------------------------------------------------…	ClsPer92	ClsPer91	Clostridium perfringens
>000010714|size:301	0.0101366	97.1%:StaAu564;97.1%:EntFa534		CC-T-AC-G-G-G-A-G-GC--A-GCA-G-T-A-G-G-G-A-A--TC-TT--CG-G-C---AA-T-G-G--AC--GA-A-A--G-T--C-T-GA-C-C-G-A--GC-A--------A--C-GCC-G-C-G-T---------G-A-G--T--GA-A-G--A-A-G-G-TT----TT-CG-----------G-A-T--------C-G-T--A---AA-A-C-TC------------------------------TG-TT-G-T--T-AGA----G--A-A--G---AA-CAAG-G---A-C-G--T-T--A----------G--T---------------------AA---------------------------------C--------T-------GA-…	StaAu564	EntFa534	Enterococcus faecalis
>000009219|size:605	0.0101336	96.7%:StaHom36;96.7%:StaHom35		CC-T-AC-G-G-G-A-G-GC--A-GCA-G-T-A-G-G-G-A-A--TC-TT--CC-G-C---AA-T-G-G--GC--GA-A-A--G-C--C-T-GA-C-G-G-A--GC-A--------A--C-GCC-G-C-G-T---------G-A-G--T--GA-T-G--A-A-G-G-TC----TT-CG-----------G-A-T--------C-G-T--A---AA-A-C-TC------------------------------TG-TT-A-T--T-AGG----G--A-A--G---AA-CAAA-C---G-T-G--T-A--A----------G--T---------------------AA---------------------------------C--------T-------GT-…	StaHom36	StaHom35	Staphylococcus hominis
>000009858|size:354	0.0100786	96.7%:LacAnim8;96.7%:LacAnim6		CC-T-AC-G-G-G-A-G-GC--A-GCA-G-T-A-G-G-G-A-A--TC-TT--CC-A-C---AA-T-G-G--GC--GA-A-A--G-C--C-T-GA-T-G-G-A--GC-A--------A--C-GCC-G-C-G-T---------G-G-G--T--GA-A-G--A-A-G-G-TC----TT-CG-----------G-A-T--------C-G-T--A---AA-A-C-CC------------------------------TG-TT-G-T--T-AGA----G--A-A--G---AA-AGTG-C---G-T-G--A-G--A----------G--T---------------------AA---------------------------------C--------T-------GT-…	LacAnim8	LacAnim6	Lactobacillus animalis
>000012796|size:638	0.0100587	95.4%:EscFer15;95.2%:ShiSon39		CC-T-AC-G-G-G-A-G-GC--A-GCA-G-T-G-G-G-G-A-A--TA-TT--GC-A-C---AA-T-G-G--GC--GC-A-A--G-C--C-T-GA-T-G-C-A--GC-C--------A--T-GCC-G-C-G-T---------G-T-A--T--GA-A-G--A-A-G-G-CC----TT-CG-----------G-G-T--------T-G-T--A---AA-G-T-AC------------------------------TT-TC-A-G--C-GGG----G--A-G--G---AA--GGG-A---G-T-A--A-A--G----------T--T---------------------AA---------------------------------T---A----C-------CT-…	EscFer15	ShiSon39	Enterococcus faecium
>000010090|size:511	0.0100417	95.2%:UndOligo;88.6%:BacPH120		CC-T-AC-G-G-G-A-G-GC--A-GCA-G-T-G-G-G-G-A-A--TT-TT--GG-A-C---AA-T-G-G--GG--GC-A-A--C-C--C-T-GA-T-C-C-A--GC-A--------A--T-GCC-G-C-G-T---------G-A-G--T--GA-A-G--A-A-G-G-CC----CT-CG-----------G-G-T--------T-G-T--A---AA-G-C-TC------------------------------TT-TT-G-T--C-AGG----G--A-A--G---AA--ACG-G---A-G-T--T-C--T----------C--T---------------------AA---------------------------------T---A----T-------AG-…	UndOligo	BacPH120	Undibacterium oligocarboniphilum
>000014541|size:522	0.0100142	94.1%:ShiSon39;94.1%:Esch1638		CC-T-AC-G-G-G-A-G-GC--A-GCA-G-T-G-G-G-G-A-A--TA-TT--GC-A-C---AA-T-G-G--GC--GC-A-A--G-C--C-T-GA-T-G-C-A--GC-C--------A--T-GCC-G-C-G-T---------G-T-A--T--GA-A-G--A-A-G-G-CC----TT-CG-----------G-G-T--------T-G-T--A---AA-G-T-AC------------------------------TT-TC-A-G--C-GGG----G--A-G--G---AA--GGG-A---G-T-A--A-A--G----------T--T---------------------AA---------------------------------T---A----C-------CT-…	ShiSon39	Esch1638	Escherichia/Shigella
>000011386|size:567	0.00997871	97.8%:EnrCl501;97.8%:RaoTer16		CC-T-AC-G-G-G-A-G-GC--A-GCA-G-T-G-G-G-G-A-A--TA-TT--GC-A-C---AA-T-G-G--GC--GC-A-A--G-C--C-T-GA-T-G-C-A--GC-C--------A--T-GCC-G-C-G-T---------G-T-A--T--GA-A-G--A-A-G-G-CC----TT-CG-----------G-G-T--------T-G-T--A---AA-G-T-AC------------------------------TT-TC-A-G--C-GGG----G--A-G--G---AA--GGC-G---A-T-A--A-G--G----------T--T---------------------AA---------------------------------T---A----A-------CC-…	EnrCl501	RaoTer16	Enterobacter cloacae
>000010865|size:611	0.00996409	98.0%:KleOx234;98.0%:KleOx231		CC-T-AC-G-G-G-A-G-GC--A-GCA-G-T-G-G-G-G-A-A--TA-TT--GC-A-C---AA-T-G-G--GC--GC-A-A--G-C--C-T-GA-T-G-C-A--GC-C--------A--T-GCC-G-C-G-T---------G-T-A--T--GA-A-G--A-A-G-G-CC----TT-CG-----------G-G-T--------T-G-T--A---AA-G-T-AC------------------------------TT-TC-A-G--C-GGG----G--A-G--G---AA--GGT-G---T-T-G--A-G--G----------T--T---------------------AA---------------------------------T---A----A-------CC-…	KleOx234	KleOx231	Klebsiella oxytoca
>000005060|size:1803	0.00994868	95.2%:StaEp124;95.2%:StaEp123		CC-T-AC-G-G-G-A-G-GC--A-GCA-G-T-A-G-G-G-A-A--TC-TT--CC-G-C---AA-T-G-G--GC--GA-A-A--G-C--C-T-GA-C-G-G-A--GC-A--------A--C-GCC-G-C-G-T---------G-A-G--T--GA-T-G--A-A-G-G-TC----TT-CG-----------G-A-T--------C-G-T--A---AA-A-C-TC------------------------------TG-TT-A-T--T-AGG----G--A-A--G---AA-TAAA-T---G-T-G--T-A--A----------G--T---------------------AA---------------------------------C--------T-------AT-…	StaEp124	StaEp123	Staphylococcus epidermidis
>000012555|size:1098	0.00987506	96.9%:ShiSon39;96.9%:Esch1638		CC-T-AC-G-G-G-A-G-GC--A-GCA-G-T-G-G-G-G-A-A--TA-TT--GC-A-C---AA-T-G-G--GC--GC-A-A--G-C--C-T-GA-T-G-C-A--GC-C--------A--T-GCC-G-C-G-T---------G-T-A--T--GA-A-G--A-A-G-G-CC----TT-CG-----------G-G-T--------T-G-T--A---AA-G-T-AC------------------------------TT-TC-A-G--C-GGG----G--A-G--G---AA--GGG-A---G-T-A--A-A--G----------T--T---------------------AA---------------------------------T---A----C-------CT-…	ShiSon39	Esch1638	Escherichia/Shigella
>000003510|size:270	0.00981858	99.8%:VeiDisp6;99.8%:VeiDisp5		CC-T-AC-G-G-G-A-G-GC--A-GCA-G-T-G-G-G-G-A-A--TC-TT--CC-G-C---AA-T-G-G--AC--GA-A-A--G-T--C-T-GA-C-G-G-A--GC-A--------A--C-GCC-G-C-G-T---------G-A-G--T--GA-T-G--A-C-G-G-CC----TT-CG-----------G-G-T--------T-G-T--A---AA-G-C-TC------------------------------TG-TT-A-A--T-CGG----G--A-C--G---AA-AGGC-C---T-T-C--T-T--G----------C--G---------------------AA---------------------------------T---A----G-------TT-…	VeiDisp6	VeiDisp5	Veillonella dispar
>000011184|size:821	0.00979374	95.4%:StaAu565;95.4%:StaAu563		CC-T-AC-G-G-G-A-G-GC--A-GCA-G-T-A-G-G-G-A-A--TC-TT--CC-G-C---AA-T-G-G--GC--GA-A-A--G-C--C-T-GA-C-G-G-A--GC-A--------A--C-GCC-G-C-G-T---------G-A-G--T--GA-T-G--A-A-G-G-TC----TT-CG-----------G-A-T--------C-G-T--A---AA-A-C-TC------------------------------TG-TT-A-T--T-AGG----G--A-A--G---AA-CATA-T---G-T-G--T-A--A----------G--T---------------------AA---------------------------------C--------T-------GT-…	StaAu565	StaAu563	Staphylococcus aureus
>000005947|size:609	0.0097802	97.8%:KleOx239;97.8%:KleOx235		CC-T-AC-G-G-G-A-G-GC--A-GCA-G-T-G-G-G-G-A-A--TA-TT--GC-A-C---AA-T-G-G--GC--GC-A-A--G-C--C-T-GA-T-G-C-A--GC-C--------A--T-GCC-G-C-G-T---------G-T-A--T--GA-A-G--A-A-G-G-CC----TT-CG-----------G-G-T--------T-G-T--A---AA-G-T-AC------------------------------TT-TC-A-G--C-GGG----G--A-G--G---AA--GGG-A---G-T-G--A-G--G----------T--T---------------------AA---------------------------------T---A----A-------CC-…	KleOx239	KleOx235	Klebsiella oxytoca
>000009803|size:427	0.00974598	91.4%:PbdDist9;88.7%:PbdDis25		CC-T-AC-G-G-G-A-G-GC--A-GCA-G-T-G-C-G-G-A-A--TA-TT--GG-T-C---AA-T-G-G--GC--GT-A-A--G-C--C-T-GA-C-C-C-A--GC-C--------A--A-GTC-G-C-G-T---------G-A-G--G--GA-T-G--A-A-G-G-TT-C--TA-TG-----------G-A-T--------C-G-T--A---AA-C-C-TC------------------------------TT-TT-A-T--A-AGG----G--A-A--T---AA-AGTG-C---G-G-G--A------------------C---------------------GT---------------------------------G-------------------…	PbdDist9	PbdDis25	Parabacteroides distasonis
>000012818|size:697	0.00973194	92.1%:EschCo29;91.9%:ShiSon39		CC-T-AC-G-G-G-A-G-GC--A-GCA-G-T-G-G-G-G-A-A--TA-TT--GC-A-C---AA-T-G-G--GC--GC-A-A--G-C--C-T-GA-T-G-C-A--GC-C--------A--T-GCC-G-C-G-T---------G-T-A--T--GA-A-G--A-A-G-G-CC----TT-CG-----------G-G-T--------T-G-T--A---AA-G-T-AC------------------------------TT-TC-A-G--C-GGG----G--A-G--G---AA--GGG-A---G-T-A--A-G--G----------T--T---------------------AA---------------------------------T---A----A-------CC-…	EschCo29	ShiSon39	Escherichia/Shigella
>000005950|size:685	0.00970755	96.7%:KleOx239;96.7%:KleOx235		CC-T-AC-G-G-G-A-G-GC--A-GCA-G-T-G-G-G-G-A-A--TA-TT--GC-A-C---AA-T-G-G--GC--GC-A-A--G-C--C-T-GA-T-G-C-A--GC-C--------A--T-GCC-G-C-G-T---------G-T-A--T--GA-A-G--A-A-G-G-CC----TT-CG-----------G-G-T--------T-G-T--A---AA-G-T-AC------------------------------TT-TC-A-G--C-GGG----G--A-G--G---AA--GGG-A---G-T-G--A-G--G----------T--T---------------------AA---------------------------------T---A----A-------CC-…	KleOx239	KleOx235	Klebsiella oxytoca
>000002704|size:651	0.00969547	96.7%:EnrCl529;96.7%:EnrCl528		CC-T-AC-G-G-G-A-G-GC--A-GCA-G-T-G-G-G-G-A-A--TA-TT--GC-A-C---AA-T-G-G--GC--GC-A-A--G-C--C-T-GA-T-G-C-A--GC-C--------A--T-GCC-G-C-G-T---------G-T-A--T--GA-A-G--A-A-G-G-CC----TT-CG-----------G-G-T--------T-G-T--A---AA-G-T-AC------------------------------TT-TC-A-G--C-GGG----G--A-G--G---AA--GGT-G---T-T-G--A-G--G----------T--T---------------------AA---------------------------------T---A----A-------CC-…	EnrCl529	EnrCl528	Enterobacter cloacae
>000014678|size:627	0.00967503	95.6%:KleP1010;95.6%:KleVar41		CC-T-AA-G-G-G-A-G-GC--A-GCA-G-T-G-G-G-G-A-A--TA-TT--GC-A-C---AA-T-G-G--GC--GC-A-A--G-C--C-T-GA-T-G-C-A--GC-C--------A--T-GCC-G-C-G-T---------G-T-G--T--GA-A-G--A-A-G-G-CC----TT-CG-----------G-G-T--------T-G-T--A---AA-G-C-AC------------------------------TT-TC-A-G--C-GGG----G--A-G--G---AA--GGC-G---A-T-A--A-G--G----------T--T---------------------AA---------------------------------T---A----A-------CC-…	KleP1010	KleVar41	Klebsiella pneumoniae
>000006248|size:515	0.00965756	95.2%:BifLon65;95.2%:BifLon64		CC-T-AC-G-G-G-A-G-GC--A-GCA-G-T-G-G-G-G-A-A--TA-TT--GC-A-C---AA-T-G-G--GC--GC-A-A--G-C--C-T-GA-T-G-C-A--GC-G--------A--C-GCC-G-C-G-T---------G-A-G--G--GA-T-G--G-A-G-G-CC----TT-CG-----------G-G-T--------T-G-T--A---AA-C-C-TC------------------------------TT-TT-A-T--C-GGG----G--A-G--C---AA--G-C-------------------------------G---------------------TG---------------------------------A-------------------…	BifLon65	BifLon64	Bifidobacterium longum subsp. Infantis
>000013145|size:960	0.00959704	95.2%:KleP1010;95.2%:KleVar41		CC-T-AC-G-G-G-A-G-GC--A-GCA-G-T-G-G-G-G-A-A--TA-TT--GC-A-C---AA-T-G-G--GC--GC-A-A--G-C--C-T-GA-T-G-C-A--GC-C--------A--T-GCC-G-C-G-T---------G-T-G--T--GA-A-G--A-A-G-G-CC----TT-CG-----------G-G-T--------T-G-T--A---AA-G-C-AC------------------------------TT-TC-A-G--C-GGG----G--A-G--G---AA--GGC-G---A-T-A--A-G--G----------T--T---------------------AA---------------------------------T---A----A-------CC-…	KleP1010	KleVar41	Klebsiella pneumoniae
>000006313|size:502	0.00959703	97.9%:DrmSpec3;92.4%:DrmHomi4	Dermabacter hominis	CC-T-AC-G-G-G-A-G-GC--A-GCA-G-T-G-G-G-G-A-A--TA-TT--GC-A-C---AA-T-G-G--GC--GA-A-A--G-C--C-T-GA-T-G-C-A--GC-G--------A--C-GCC-G-C-G-T---------G-G-G--G--GA-T-G--A-C-G-G-CC----TT-CG-----------G-G-T--------T-G-T--A---AA-C-C-TC------------------------------TT-TC-A-G--C-AAG----G--A-A--G---AA--G-C-------------------------------G---------------------AA---------------------------------A-------------------…	DrmSpec3	DrmHomi4	Dermabacter hominis
>000013517|size:375	0.00958099	96.7%:EnrCl498;96.7%:EnrCl489		CC-T-AT-G-G-G-A-G-GC--A-GCA-G-T-G-G-G-G-A-A--TA-TT--GC-A-C---AA-T-G-G--GC--GC-A-A--G-C--C-T-GA-T-G-C-A--GC-C--------A--T-GCC-G-C-G-T---------G-T-A--T--GA-A-G--A-A-G-G-CC----TT-CG-----------G-G-T--------T-G-T--A---AA-G-T-AC------------------------------TT-TC-A-G--C-GGG----G--A-G--G---AA--GGC-G---A-C-A--G-G--G----------T--T---------------------AA---------------------------------T---A----A-------CC-…	EnrCl498	EnrCl489	Enterobacter cloacae
>000002156|size:457	0.00955134	95.2%:UndOligo;88.6%:BacPH120		CC-T-AC-G-G-G-A-G-GC--A-GCA-G-T-G-G-G-G-A-A--TT-TT--GG-A-C---AA-T-G-G--GG--GC-A-A--C-C--C-T-GA-T-C-C-A--GC-A--------A--T-GCC-G-C-G-T---------G-A-G--T--GA-A-G--A-A-G-G-CC----CT-CG-----------G-G-T--------T-G-T--A---AA-G-C-TC------------------------------TT-TT-G-T--C-AGG----G--A-A--G---AA--ACG-G---A-G-T--T-C--T----------C--T---------------------AA---------------------------------T---A----T-------AG-…	UndOligo	BacPH120	Undibacterium oligocarboniphilum
>000002687|size:544	0.00952614	98.0%:EnrCl529;98.0%:EnrCl528		CC-T-AC-G-G-G-A-G-GC--A-GCA-G-T-G-G-G-G-A-A--TA-TT--GC-A-C---AA-T-G-G--GC--GC-A-A--G-C--C-T-GA-T-G-C-A--GC-C--------A--T-GCC-G-C-G-T---------G-T-A--T--GA-A-G--A-A-G-G-CC----TT-CG-----------G-G-T--------T-G-T--A---AA-G-T-AC------------------------------TT-TC-A-G--C-GGG----G--A-G--G---AA--GGT-G---T-T-G--A-G--G----------T--T---------------------AA---------------------------------T---A----A-------CC-…	EnrCl529	EnrCl528	Enterobacter cloacae
>000007180|size:604	0.00947521	95.2%:PntAg246;95.2%:PntSte20		CC-T-AC-G-G-G-A-G-GC--A-GCA-G-T-G-G-G-G-A-A--TA-TT--GC-A-C---AA-T-G-G--GC--GC-A-A--G-C--C-T-GA-T-G-C-A--GC-C--------A--T-GCC-G-C-G-T---------G-T-A--T--GA-A-G--A-A-G-G-CC----TT-CG-----------G-G-T--------T-G-T--A---AA-G-T-AC------------------------------TT-TC-A-G--C-GGG----G--A-G--G---AA--GGC-G---A-T-G--T-G--G----------T--T---------------------AA---------------------------------T---A----A-------CC-…	PntAg246	PntSte20	Pantoea agglomerans
>000013802|size:848	0.00947048	93.7%:ClsPer92;93.7%:ClsPer91		CC-T-AC-G-G-G-A-G-GC--A-GCA-G-T-A-G-G-G-A-A--TA-TT--GC-A-C---AA-T-G-G--GG--GA-A-A--C-C--C-T-GA-T-G-C-A--GC-A--------A--C-GCC-G-C-G-T---------G-A-G--T--GA-T-G--A-A-G-G-TT----TT-CG-----------G-A-T--------C-G-T--A---AA-G-C-TC------------------------------TG-TC-T-T--T-GGG----G--A-A--G---A-------------------------------------T---------------------AA-----------------------------------------------------…	ClsPer92	ClsPer91	Clostridium perfringens
>000007398|size:739	0.00944493	96.7%:KleVar40;96.7%:KlePn961		CC-T-AC-G-G-G-A-G-GC--A-GCA-G-T-G-G-G-G-A-A--TA-TT--GC-A-C---AA-T-G-G--GC--GC-A-A--G-C--C-T-GA-T-G-C-A--GC-C--------A--T-GCC-G-C-G-T---------G-T-G--T--GA-A-G--A-A-G-G-CC----TT-CG-----------G-G-T--------T-G-T--A---AA-G-C-AC------------------------------TT-TC-A-G--C-GGG----G--A-G--G---AA--GGC-G---G-T-G--A-G--G----------T--T---------------------AA---------------------------------T---A----A-------CC-…	KleVar40	KlePn961	Klebsiella pneumoniae
>000014672|size:775	0.00942195	96.7%:KleP1011;96.7%:KlePn949		CC-T-AC-G-G-G-A-G-GC--A-GCA-G-T-G-G-G-G-A-A--TA-TT--GC-A-C---AA-T-G-G--GC--GC-A-A--G-C--C-T-GA-T-G-C-A--GC-C--------A--T-GCC-G-C-G-T---------G-T-G--T--GA-A-G--A-A-G-G-CC----TT-CG-----------G-G-T--------T-G-T--A---AA-G-C-AC------------------------------TT-TC-A-G--C-GGG----G--A-G--G---AA--GGC-G---A-T-A--A-G--G----------T--T---------------------AA---------------------------------T---A----A-------CC-…	KleP1011	KlePn949	Klebsiella pneumoniae
>000006009|size:944	0.00939663	95.4%:EscFer15;95.2%:ShiSon39		CC-T-AC-G-G-G-A-G-GC--A-GCA-G-T-G-G-G-G-A-A--TA-TT--GC-A-C---AA-T-G-G--GC--GC-A-A--G-C--C-T-GA-T-G-C-A--GC-C--------A--T-GCC-G-C-G-T---------G-T-A--T--GA-A-G--A-A-G-G-CC----TT-CG-----------G-G-T--------T-G-T--A---AA-G-T-AC------------------------------TT-TC-A-G--C-GGG----G--A-G--G---AA--GGG-A---G-T-A--A-A--G----------T--T---------------------AA---------------------------------T---A----C-------CT-…	EscFer15	ShiSon39	Enterococcus faecium
>000010750|size:694	0.00938836	96.7%:StaAu564;96.7%:EntFa534		C--T-AC-G-G-G-A-G-GC--A-GCA-G-T-A-G-G-G-A-A--TC-TT--CG-G-C---AA-T-G-G--AC--GA-A-A--G-T--C-T-GA-C-C-G-A--GC-A--------A--C-GCC-G-C-G-T---------G-A-G--T--GA-A-G--A-A-G-G-TT----TT-CG-----------G-A-T--------C-G-T--A---AA-A-C-TC------------------------------TG-TT-G-T--T-AGA----G--A-A--G---AA-CAAG-G---A-C-G--T-T--A----------G--T---------------------AA---------------------------------C--------T-------GA-…	StaAu564	EntFa534	Enterococcus faecalis
>000003004|size:653	0.00928552	95.4%:StaAu377;95.2%:StaAu565	Staphylococcus aureus	CC-T-AC-G-G-G-A-G-GC--A-GCA-G-T-A-G-G-G-A-A--TC-TT--CC-G-C---AA-T-G-G--GC--GA-A-A--G-C--C-T-GA-C-G-G-A--GC-A--------A--C-GCC-G-C-G-T---------G-A-G--T--GA-T-G--A-A-G-G-TC----TT-CG-----------G-A-T--------C-G-T--A---AA-A-C-TC------------------------------TG-TT-A-T--T-AGG----G--A-A--G---AA-CATA-T---G-T-G--T-A--A----------G--T---------------------AA---------------------------------C--------T-------GT-…	StaAu377	StaAu565	Staphylococcus aureus
>000001191|size:566	0.00924959	97.8%:KlePn881;97.8%:KlePn761		CC-T-AC-G-G-G-A-G-GC--A-GCA-G-T-G-G-G-G-A-A--TA-TT--GC-A-C---AA-T-G-G--GC--GC-A-A--G-C--C-T-GA-T-G-C-A--GC-C--------A--T-GCC-G-C-G-T---------G-T-G--T--GA-A-G--A-A-G-G-CC----TT-CG-----------G-G-T--------T-G-T--A---AA-G-C-AC------------------------------TT-TC-A-G--C-GGG----G--A-G--G---AA--GGC-G---G-T-G--A-G--G----------T--T---------------------AA---------------------------------T---A----A-------CC-…	KlePn881	KlePn761	Klebsiella pneumoniae
>000013320|size:561	0.00921478	96.7%:KleP1011;96.7%:KlePn949		CC-T-AC-G-G-G-A-G-GC--A-GCA-G-T-G-G-G-G-A-A--TA-TT--GC-A-C---AA-T-G-G--GC--GC-A-A--G-C--C-T-GA-T-G-C-A--GC-C--------A--T-GCC-G-C-G-T---------G-T-G--T--GA-A-G--A-A-G-G-CC----TT-CG-----------G-G-T--------T-G-T--A---AA-G-C-AC------------------------------TT-TC-A-G--C-GGG----G--A-G--G---AA--GGC-G---A-T-A--A-G--G----------T--T---------------------AA---------------------------------T---A----A-------CC-…	KleP1011	KlePn949	Klebsiella pneumoniae
>000014354|size:471	0.0092125	95.2%:StaEp124;95.2%:StaEp123		CC-T-AC-G-G-G-A-G-GC--A-GCA-G-T-A-G-G-G-A-A--TC-TT--CC-G-C---AA-T-G-G--GC--GA-A-A--G-C--C-T-GA-C-G-G-A--GC-A--------A--C-GCC-G-C-G-T---------G-A-G--T--GA-T-G--A-A-G-G-TC----TT-CG-----------G-A-T--------C-G-T--A---AA-A-C-TC------------------------------TG-TT-A-T--T-AGG----G--A-A--G---AA-CAAA-T---G-T-G--T-A--A----------G--T---------------------AA---------------------------------C--------T-------AT-…	StaEp124	StaEp123	Staphylococcus epidermidis
>000004830|size:799	0.00916988	95.2%:StaEp124;95.2%:StaEp123		CC-T-AC-G-G-G-A-G-GC--A-GCA-G-T-A-G-G-G-A-A--TC-TT--CC-G-C---AA-T-G-G--GC--GA-A-A--G-C--C-T-GA-C-G-G-A--GC-A--------A--C-GCC-G-C-G-T---------G-A-G--T--GA-T-G--A-A-G-G-TC----TT-CG-----------G-A-T--------C-G-T--A---AA-A-C-TC------------------------------TG-TT-A-T--T-AGG----G--A-A--G---AA-CAAA-T---G-T-G--T-A--A----------G--T---------------------AA---------------------------------C--------T-------AT-…	StaEp124	StaEp123	Staphylococcus epidermidis
>000013617|size:550	0.00907629	96.7%:PntEuca4;96.7%:PntAgg53		CC-T-AC-G-G-G-A-G-GC--A-GCA-G-T-G-G-G-G-A-A--TA-TT--GC-A-C---AA-T-G-G--GC--GC-A-A--G-C--C-T-GA-T-G-C-A--GC-C--------A--T-GCC-G-C-G-T---------G-T-A--T--GA-A-G--A-A-G-G-CC----TT-CG-----------G-G-T--------T-G-T--A---AA-G-T-AC------------------------------TT-TC-A-G--C-GGG----G--A-G--G---AA--GGC-G---A-T-G--T-G--G----------T--T---------------------AA---------------------------------T---A----A-------CC-…	PntEuca4	PntAgg53	Pantoea agglomerans
>000015930|size:402	0.00905179	99.8%:EnrCl498;99.8%:EnrCl489		CC-T-AC-G-G-G-A-G-GC--A-GCA-G-T-G-G-G-G-A-A--TA-TT--GC-A-C---AA-T-G-G--GC--GC-A-A--G-C--C-T-GA-T-G-C-A--GC-C--------A--T-GCC-G-C-G-T---------G-T-A--T--GA-A-G--A-A-G-G-CC----TT-CG-----------G-G-T--------T-G-T--A---AA-G-T-AC------------------------------TT-TC-A-G--C-GGG----G--A-G--G---AA--GGC-G---A-C-A--G-G--G----------T--T---------------------AA---------------------------------T---A----A-------CC-…	EnrCl498	EnrCl489	Enterobacter cloacae
>000013936|size:382	0.00904407	88.2%:BcsFra39;88.2%:BcsFra38		CC-T-AC-G-G-G-A-G-GC--A-GCA-G-T-G-A-G-G-A-A--TA-TT--GG-T-C---AA-T-G-G--GC--GC-T-A--G-C--C-T-GA-C-C-C-A--GC-C--------A--C-GTA-G-C-G-T---------G-A-A--G--GA-T-G--A-A-G-G-CT-C--TA-TG-----------G-G-T--------C-G-T--A---AA-C-T-TC------------------------------TT-TT-A-T--A-TAA----G--A-A--T---AA-AGTG-C---A-G-T--A------------------T---------------------GT---------------------------------A-------------------…	BcsFra39	BcsFra38	Bacteroides fragilis
>000003560|size:452	0.00901447	95.0%:BifDen14;95.0%:BifDent2		CC-T-AC-G-G-G-A-G-GC--A-GCA-G-T-G-G-G-G-A-A--TA-TT--GC-A-C---AA-T-G-G--GC--GC-A-A--G-C--C-T-GA-T-G-C-A--GC-G--------A--C-GCC-G-C-G-T---------G-C-G--G--GA-T-G--G-A-G-G-CC----TT-CG-----------G-G-T--------T-G-T--A---AA-C-C-GC------------------------------TT-TT-G-A--T-CGG----G--A-G--C---AA--GCC-C-----------------------------T---------------------TC---------------------------------G-------------------…	BifDen14	BifDent2	Bifidobacterium dentium
>000006243|size:645	0.00894313	94.0%:BifLon65;94.0%:BifLon64		CC-T-AC-G-G-G-A-G-GC--A-GCA-G-T-G-G-G-G-A-A--TA-TT--GC-A-C---AA-T-G-G--GC--GC-A-A--G-C--C-T-GA-T-G-C-A--GC-G--------A--C-GCC-G-C-G-T---------G-A-G--G--GA-T-G--G-A-G-G-CC----TT-CG-----------G-G-T--------T-G-T--A---AA-C-C-TC------------------------------TT-TT-A-T--C-GGG----G--A-G--C---AA--G-C-------------------------------G---------------------TG---------------------------------A-------------------…	BifLon65	BifLon64	Bifidobacterium longum subsp. Infantis
>000007277|size:241	0.00893912	96.7%:PntEuca4;96.7%:PntAgg53		CC-T-AC-G-G-G-A-G-GC--A-GCA-G-T-G-G-G-G-A-A--TA-TT--GC-A-C---AA-T-G-G--GC--GC-A-A--G-C--C-T-GA-T-G-C-A--GC-C--------A--T-GCC-G-C-G-T---------G-T-A--T--GA-A-G--A-A-G-G-CC----TT-CG-----------G-G-T--------T-G-T--A---AA-G-T-AC------------------------------TT-TC-A-G--C-GGG----G--A-G--G---AA--GGC-G---A-T-G--T-G--G----------T--T---------------------AA---------------------------------T---A----A-------CC-…	PntEuca4	PntAgg53	Pantoea agglomerans
>000013049|size:774	0.0089356	94.3%:KleOxy31;94.1%:EnrCl527		CC-T-AC-G-G-G-A-G-GC--A-GCA-G-T-G-G-G-G-A-A--TA-TT--GC-A-C---AA-T-G-G--GC--GC-A-A--G-C--C-T-GA-T-G-C-A--GC-C--------A--T-GCC-G-C-G-T---------G-T-A--T--GA-A-G--A-A-G-G-CC----TT-CG-----------G-G-T--------T-G-T--A---AA-G-T-AC------------------------------TT-TC-A-G--C-GGG----G--A-G--G---AA--GGC-G---A-T-A--A-G--G----------T--T---------------------AA---------------------------------T---A----A-------CC-…	KleOxy31	EnrCl527	Klebsiella oxytoca
>000002067|size:725	0.00891397	99.8%:SttAng69;99.8%:SttAng68		CC-T-AC-G-G-G-A-G-GC--A-GCA-G-T-A-G-G-G-A-A--TC-TT--CG-G-C---AA-T-G-G--GG--GG-A-A--C-C--C-T-GA-C-C-G-A--GC-A--------A--C-GCC-G-C-G-T---------G-A-G--T--GA-A-G--A-A-G-G-TT----TT-CG-----------G-A-T--------C-G-T--A---AA-G-C-TC------------------------------TG-TT-G-T--T-AAG----G--A-A--G---AA-CGAG-T---G-T-G--A-G--A----------A--T---------------------GG---------------------------------A---A----A-------GT-…	SttAng69	SttAng68	Streptococcus anginosus
>000014732|size:623	0.00887525	95.2%:KleP1010;95.2%:KleVar41		CC-T-AC-G-G-G-A-G-GC--A-GCA-G-T-G-G-G-G-A-A--TA-TT--GC-A-C---AA-T-G-G--GC--GC-A-A--G-C--C-T-GA-T-G-C-A--GC-C--------A--T-GCC-G-C-G-T---------G-T-G--T--GA-A-G--A-A-G-G-CC----TT-CG-----------G-G-T--------T-G-T--A---AA-G-C-AC------------------------------TT-TC-A-G--C-GGG----G--A-G--G---AA--GGC-G---A-T-A--A-G--G----------T--T---------------------AA---------------------------------T---A----A-------CC-…	KleP1010	KleVar41	Klebsiella pneumoniae
>000002542|size:509	0.00885401	96.9%:StaAu564;96.9%:EntFa534		CC-T-AC-G-G-G-A-G-GC--A-GCA-G-T-A-G-G-G-A-A--TC-TT--CG-G-C---AA-T-G-G--AC--GA-A-A--G-T--C-T-GA-C-C-G-A--GC-A--------A--C-GCC-G-C-G-T---------G-A-G--T--GA-A-G--A-A-G-G-TT----TT-CG-----------G-A-T--------C-G-T--A---AA-A-C-TC------------------------------TG-TT-G-T--T-AGA----G--A-A--G---AA-CAAG-G---A-C-G--T-T--A----------G--T---------------------AA---------------------------------C--------T-------GA-…	StaAu564	EntFa534	Enterococcus faecalis
>000005801|size:520	0.00880764	97.8%:KleOx239;97.8%:KleOx235		CC-T-AC-G-G-G-A-G-GC--A-GCA-G-T-G-G-G-G-A-A--TA-TT--GC-A-C---AA-T-G-G--GC--GC-A-A--G-C--C-T-GA-T-G-C-A--GC-C--------A--T-GCC-G-C-G-T---------G-T-A--T--GA-A-G--A-A-G-G-CC----TT-CG-----------G-G-T--------T-G-T--A---AA-G-T-AC------------------------------TT-TC-A-G--C-GGG----G--A-G--G---AA--GGG-A---G-T-G--A-G--G----------T--T---------------------AA---------------------------------T---A----A-------CC-…	KleOx239	KleOx235	Klebsiella oxytoca
>000009510|size:628	0.00880294	91.4%:BcsFra39;91.4%:BcsFra38		CC-T-AC-G-G-G-A-G-GC--A-GCA-G-T-G-A-G-G-A-A--TA-TT--GG-T-C---AA-T-G-G--GC--GC-T-A--G-C--C-T-GA-A-C-C-A--GC-C--------A--C-GTA-G-C-G-T---------G-A-A--G--GA-T-G--A-A-G-G-CT-C--TA-TG-----------G-G-T--------C-G-T--A---AA-C-T-TC------------------------------TT-TT-A-T--A-TAA----G--A-A--T---AA-AGTG-C---A-G-T--A------------------T---------------------GT---------------------------------A-------------------…	BcsFra39	BcsFra38	Bacteroides fragilis
>000001954|size:726	0.00879772	97.8%:AciGui12;97.8%:AciGui11		CC-T-AC-G-G-G-A-G-GC--A-GCA-G-T-G-G-G-G-A-A--TA-TT--GG-A-C---AA-T-G-G--GG--GG-A-A--C-C--C-T-GA-T-C-C-A--GC-C--------A--T-GCC-G-C-G-T---------G-T-G--T--GA-A-G--A-A-G-G-CC----TT-AT-----------G-G-T--------T-G-T--A---AA-G-C-AC------------------------------TT-TA-A-G--C-GAG----G--A-G--G---AG--GCT-C---T-C-T--T-G--G----------T--T---------------------AA---------------------------------T---A----C-------CC-…	AciGui12	AciGui11	Acinetobacter guillouiae/iwoffii
>000003877|size:387	0.00879352	96.7%:DftAci28;96.7%:DftAci27		CC-T-AC-G-G-G-A-G-GC--A-GCA-G-T-G-G-G-G-A-A--TT-TT--GG-A-C---AA-T-G-G--GC--GA-A-A--G-C--C-T-GA-T-C-C-A--GC-A--------A--T-GCC-G-C-G-T---------G-C-A--G--GA-T-G--A-A-G-G-CC----TT-CG-----------G-G-T--------T-G-T--A---AA-C-T-GC------------------------------TT-TT-G-T--A-CGG----A--A-C--G---AA--AAA-G---C-T-T--C-T--C----------C--T---------------------AA---------------------------------T---A----C-------GA-…	DftAci28	DftAci27	Delftia acidovorans
>000013945|size:833	0.00876654	91.4%:BcsFra39;91.4%:BcsFra38		CC-T-AC-G-G-G-A-G-GC--A-GCA-G-T-G-A-G-G-A-A--TA-TT--GG-T-C---AA-T-G-G--GC--GC-T-A--G-C--C-T-GA-A-C-C-A--GC-C--------A--A-GTC-G-C-G-T---------G-A-A--G--GA-T-G--A-A-G-G-CT-C--TA-TG-----------G-G-T--------C-G-T--A---AA-C-T-TC------------------------------TT-TT-A-T--A-TAA----G--A-A--T---AA-AGTG-C---A-G-T--A------------------T---------------------GT---------------------------------A-------------------…	BcsFra39	BcsFra38	Bacteroides fragilis
>000003781|size:777	0.00869838	97.8%:NgvSucc3;95.2%:NgvSucc2		CC-T-AC-G-G-G-A-G-GC--A-GCA-G-T-G-G-G-G-A-A--TC-TT--CC-G-C---AA-T-G-G--AC--GA-A-A--G-T--C-T-GA-C-G-G-A--GC-A--------A--C-GCC-G-C-G-T---------G-A-G--T--GA-A-G--A-A-G-G-CC----TT-CG-----------G-G-T--------T-G-T--A---AA-G-C-TC------------------------------TG-TT-A-T--T-CGG----G--A-A--G---AA-CGAT-T---C-G-T--T-T--G----------T--A---------------------AA---------------------------------T---A----A-------TG-…	NgvSucc3	NgvSucc2	Negativicoccus succinicivorans
>000008045|size:438	0.00869786	97.7%:ClsPer92;97.7%:ClsPer91		CC-T-AC-G-G-G-A-G-GC--A-GCA-G-T-G-G-G-G-A-A--TA-TT--GC-A-C---AA-T-G-G--GG--GA-A-A--C-C--C-T-GA-T-G-C-A--GC-A--------A--C-GCC-G-C-G-T---------G-A-G--T--GA-T-G--A-A-G-G-TT----TT-CG-----------G-A-T--------C-G-T--A---AA-G-C-TC------------------------------TG-TC-T-T--T-GGG----G--A-A--G---A-------------------------------------T---------------------AA-----------------------------------------------------…	ClsPer92	ClsPer91	Clostridium perfringens
>000012982|size:627	0.00866386	95.4%:KleP1010;95.4%:KleVar41		CC-T-AC-G-G-G-A-G-GC--A-GCA-G-T-G-G-G-G-A-A--TA-TT--GC-A-C---AA-T-G-G--GC--GC-A-A--G-C--C-T-GA-T-G-C-A--GC-C--------A--T-GCC-G-C-G-T---------G-T-G--T--GA-A-G--A-A-G-G-CC----TT-CG-----------G-G-T--------T-G-T--A---AA-G-C-AC------------------------------TT-TC-A-G--C-GGG----G--A-G--G---AA--GGC-G---A-T-A--A-G--G----------T--T---------------------AA---------------------------------T---A----A-------CC-…	KleP1010	KleVar41	Klebsiella pneumoniae
>000012103|size:630	0.00866352	97.8%:StaEp122;97.8%:StaCap17		CC-T-AC-G-G-G-A-G-GC--A-GCA-G-T-A-G-G-G-A-A--TC-TT--CC-G-C---AA-T-G-G--GC--GA-A-A--G-C--C-T-GA-C-G-G-A--GC-A--------A--C-GCC-G-C-G-T---------G-A-G--T--GA-A-G--A-A-G-G-TC----TT-CG-----------G-A-T--------C-G-T--A---AA-A-C-TC------------------------------TG-TT-A-T--T-AGG----G--A-A--G---AA-CAAA-T---G-T-G--T-A--A----------G--T---------------------AA---------------------------------C--------T-------AT-…	StaEp122	StaCap17	Staphylococcus epidermidis
>000006049|size:743	0.00866137	94.1%:ShiSon39;94.1%:Esch1638		CC-T-AC-G-G-G-A-G-GC--A-GCA-G-T-G-G-G-G-A-A--TA-TT--GC-A-C---AA-T-G-G--GC--GC-A-A--G-C--C-T-GA-T-G-C-A--GC-C--------A--T-GCC-G-C-G-T---------G-T-A--T--GA-A-G--A-A-G-G-CC----TT-CG-----------G-G-T--------T-G-T--A---AA-G-T-AC------------------------------TT-TC-A-G--C-GGG----G--A-G--G---AA--GGG-A---G-T-A--A-A--G----------T--T---------------------AA---------------------------------T---A----C-------CT-…	ShiSon39	Esch1638	Escherichia/Shigella
>000007399|size:647	0.00859532	96.7%:EnrAsb91;96.7%:EnrCl188		CC-T-AC-G-G-G-A-G-GC--A-GCA-G-T-G-G-G-G-A-A--TA-TT--GC-A-C---AA-T-G-G--GC--GC-A-A--G-C--C-T-GA-T-G-C-A--GC-C--------A--T-GCC-G-C-G-T---------G-T-A--T--GA-A-G--A-A-G-G-CC----TT-CG-----------G-G-T--------T-G-T--A---AA-G-T-AC------------------------------TT-TC-A-G--C-GGG----G--A-G--G---AA--GGC-G---G-T-G--A-G--G----------T--T---------------------AA---------------------------------T---A----A-------CC-…	EnrAsb91	EnrCl188	Enterobacter cloacae
>000012549|size:751	0.00856216	96.9%:ShiSon39;96.9%:Esch1638		CC-T-AC-G-G-G-A-G-GC--A-GCA-G-T-G-G-G-G-A-A--TA-TT--GC-A-C---AA-T-G-G--GC--GC-A-A--G-C--C-T-GA-T-G-C-A--GC-C--------A--T-GCC-G-C-G-T---------G-T-A--T--GA-A-G--A-A-G-G-CC----TT-CG-----------G-G-T--------T-G-T--A---AA-G-T-AC------------------------------TT-TC-A-G--C-GGG----G--A-G--G---AA--GGG-A---G-T-A--A-A--G----------T--T---------------------AA---------------------------------T---A----C-------CT-…	ShiSon39	Esch1638	Escherichia/Shigella
>000011151|size:432	0.00855749	94.1%:StaWar47;94.1%:AciBa511		CC-T-AC-G-G-G-A-G-GC--A-GCA-G-T-A-G-G-G-A-A--TC-TT--CC-G-C---AA-T-G-G--GC--GA-A-A--G-C--C-T-GA-C-G-G-A--GC-A--------A--C-GCC-G-C-G-T---------G-A-G--T--GA-T-G--A-A-G-G-TC----TT-AG-----------G-A-T--------C-G-T--A---AA-A-C-TC------------------------------TG-TT-A-T--C-AGG----G--A-A--G---AA-CAAA-T---G-T-G--T-A--A----------G--T---------------------AA---------------------------------C--------T-------GT-…	StaWar47	AciBa511	Staphylococcus warneri
>000013053|size:1000	0.00851927	94.1%:KleP1010;94.1%:KleVar41		CC-T-AC-G-G-G-A-G-GC--A-GCA-G-T-G-G-G-G-A-A--TA-TT--GC-A-C---AA-T-G-G--GC--GC-A-A--G-C--C-T-GA-T-G-C-A--GC-C--------A--T-GCC-G-C-G-T---------G-T-G--T--GA-A-G--A-A-G-G-CC----TT-CG-----------G-G-T--------T-G-T--A---AA-G-C-AC------------------------------TT-TC-A-G--C-GGG----G--A-G--G---AA--GGC-G---A-T-A--A-G--G----------T--T---------------------AA---------------------------------T---A----A-------CC-…	KleP1010	KleVar41	Klebsiella pneumoniae
>000010175|size:704	0.00842132	95.2%:SttSa536;95.2%:SttSa535		CC-T-AC-G-G-G-A-G-GC--A-GCA-G-T-A-G-G-G-A-A--TC-TT--CG-G-C---AA-T-G-G--GG--GC-A-A--C-C--C-T-GA-C-C-G-A--GC-A--------A--C-GCC-G-C-G-T---------G-A-G--T--GA-A-G--A-A-G-G-TT----TT-CG-----------G-A-T--------C-G-T--A---AA-G-C-TC------------------------------TG-TT-G-T--A-AGT----C--A-A--G---AA-CGAG-T---G-T-G--A-G--A----------G--T---------------------GG---------------------------------A---A----A-------AT-…	SttSa536	SttSa535	Streptococcus salivarius
>000012374|size:326	0.00840098	95.4%:StaEp124;95.4%:StaEp123		CC-T-AC-G-G-G-A-G-GC--A-GCA-G-T-A-G-G-G-A-A--TC-TT--CC-G-C---AA-T-G-G--GC--GA-A-A--G-C--C-T-GA-C-G-G-A--GC-A--------A--C-GCC-G-C-G-T---------G-A-G--T--GA-T-G--A-A-G-G-TC----TT-CG-----------G-A-T--------C-G-T--A---AA-A-C-TC------------------------------TG-TT-A-T--T-AGG----G--A-A--G---AA-CAAA-T---G-T-G--T-A--A----------G--T---------------------AA---------------------------------C--------T-------AT-…	StaEp124	StaEp123	Staphylococcus epidermidis
>000013003|size:406	0.00832927	95.4%:EnrCl498;95.4%:EnrCl489		CC-T-AC-G-G-G-A-G-GC--A-GCA-G-T-G-G-G-G-A-A--TA-TT--GC-A-C---AA-T-G-G--GC--GC-A-A--G-C--C-T-GA-T-G-C-A--GC-C--------A--T-GCC-G-C-G-T---------G-T-A--T--GA-A-G--A-A-G-G-CC----TT-CG-----------G-G-T--------T-G-T--A---AA-G-T-AC------------------------------TT-TC-A-G--C-GGG----G--A-G--G---AA--GGC-G---A-C-A--G-G--G----------T--T---------------------AA---------------------------------T---A----A-------CC-…	EnrCl498	EnrCl489	Enterobacter cloacae
>000002364|size:408	0.00831494	96.7%:SttMit48;96.7%:SttMit46		CC-T-AC-G-G-G-A-G-GC--A-GCA-G-T-A-G-G-G-A-A--TC-TT--CG-G-C---AA-T-G-G--AC--GG-A-A--G-T--C-T-GA-C-C-G-A--GC-A--------A--C-GCC-G-C-G-T---------G-A-G--T--GA-A-G--A-A-G-G-TT----TT-CG-----------G-A-T--------C-G-T--A---AA-G-C-TC------------------------------TG-TT-G-T--A-AGA----G--A-A--G---AA-CGAG-T---G-T-G--A-G--A----------G--T---------------------GG---------------------------------A---A----A-------GT-…	SttMit48	SttMit46	Streptococcus mitis
>000010186|size:561	0.00829297	96.9%:SttSa536;96.9%:SttSa535		CC-T-AA-G-G-G-A-G-GC--A-GCA-G-T-A-G-G-G-A-A--TC-TT--CG-G-C---AA-T-G-G--GG--GC-A-A--C-C--C-T-GA-C-C-G-A--GC-A--------A--C-GCC-G-C-G-T---------G-A-G--T--GA-A-G--A-A-G-G-TT----TT-CG-----------G-A-T--------C-G-T--A---AA-G-C-TC------------------------------TG-TT-G-T--A-AGT----C--A-A--G---AA-CGAG-T---G-T-G--A-G--A----------G--T---------------------GG---------------------------------A---A----A-------GT-…	SttSa536	SttSa535	Streptococcus salivarius
>000006394|size:356	0.00823617	94.5%:KleP1010;94.5%:KleVar41		CC-T-AC-G-G-G-A-G-GC--A-GCA-G-T-G-G-G-G-A-A--TA-TT--GC-A-C---AA-T-G-G--GC--GC-A-A--G-C--C-T-GA-T-G-C-A--GC-C--------A--T-GCC-G-C-G-T---------G-T-G--T--GA-A-G--A-A-G-G-CC----TT-CG-----------G-G-T--------T-G-T--A---AA-G-C-AC------------------------------TT-TC-A-G--C-GGG----G--A-G--G---AA--GGC-G---A-T-A--A-G--G----------T--T---------------------AA---------------------------------T---A----A-------CC-…	KleP1010	KleVar41	Klebsiella pneumoniae
>000010052|size:415	0.00816672	94.1%:UndOligo;87.5%:BacPH120		CC-T-AC-G-G-G-A-G-GC--A-GCA-G-T-G-G-G-G-A-A--TT-TT--GG-A-C---AA-T-G-G--GG--GC-A-A--C-C--C-T-GA-T-C-C-A--GC-A--------A--T-GCC-G-C-G-T---------G-A-G--T--GA-A-G--A-A-G-G-CC----CT-CG-----------G-G-T--------T-G-T--A---AA-G-C-TC------------------------------TT-TT-G-T--C-AGG----G--A-A--G---AA--ACG-G---A-G-T--T-C--T----------C--T---------------------AA---------------------------------T---A----T-------AG-…	UndOligo	BacPH120	Undibacterium oligocarboniphilum
>000011219|size:498	0.00812716	96.7%:StaWar47;96.7%:AciBa511		CC-T-AC-G-G-G-A-G-GC--A-GCA-G-T-A-G-G-G-A-A--TC-TT--CC-G-C---AA-T-G-G--GC--GA-A-A--G-C--C-T-GA-C-G-G-A--GC-A--------A--C-GCC-G-C-G-T---------G-A-G--T--GA-T-G--A-A-G-G-TC----TT-CG-----------G-A-T--------C-G-T--A---AA-A-C-TC------------------------------TG-TT-A-T--C-AGG----G--A-A--G---AA-CAAA-T---G-T-G--T-A--A----------G--T---------------------AA---------------------------------C--------T-------GT-…	StaWar47	AciBa511	Staphylococcus warneri
>000005977|size:258	0.00807932	97.8%:KleOx209;97.8%:KleOx142		CC-T-AC-G-G-G-A-G-GC--A-GCA-G-T-G-G-G-G-A-A--TA-TT--GC-A-C---AA-T-G-G--GC--GC-A-A--G-C--C-T-GA-T-G-C-A--GC-C--------A--T-GCC-G-C-G-T---------G-T-A--T--GA-A-G--A-A-G-G-CC----TT-CG-----------G-G-T--------T-G-T--A---AA-G-T-AC------------------------------TT-TC-A-G--C-GGG----G--A-G--G---AA--GGG-A---G-T-A--A-G--G----------T--T---------------------AA---------------------------------T---A----A-------CC-…	KleOx209	KleOx142	Klebsiella oxytoca
>000011043|size:854	0.00805988	95.2%:KleOx234;95.2%:KleOx231		CC-T-AC-G-G-G-A-G-GC--A-GCA-G-T-G-G-G-G-A-A--TA-TT--GC-A-C---AA-T-G-G--GC--GC-A-A--G-C--C-T-GA-T-G-C-A--GC-C--------A--T-GCC-G-C-G-T---------G-T-A--T--GA-A-G--A-A-G-G-CC----TT-CG-----------G-G-T--------T-G-T--A---AA-G-T-AC------------------------------TT-TC-A-G--C-GGG----G--A-G--G---AA--GGT-G---T-T-G--A-G--G----------T--T---------------------AA---------------------------------T---A----A-------CC-…	KleOx234	KleOx231	Klebsiella oxytoca
>000001366|size:329	0.00804852	96.5%:ClsClos3;96.5%:FstSacc4	Fusicatenibacter saccharivorans	CC-T-AC-G-G-G-A-G-GC--A-GCA-G-T-G-G-G-G-A-A--TA-TT--GC-A-C---AA-T-G-G--GG--GA-A-A--C-C--C-T-GA-T-G-C-A--GC-G--------A--C-GCC-G-C-G-T---------G-A-G--C--GA-A-G--A-A-G-T-AT----TT-CG-----------G-T-A--------T-G-T--A---AA-G-C-TC------------------------------TA-TC-A-G--C-AGG----G--A-A--G---A-------------------------------------T---------------------AA-----------------------------------------------------…	ClsClos3	FstSacc4	Fusicatenibacter saccharivorans
>000010629|size:407	0.00802637	95.4%:StaAu564;95.4%:EntFa534		CC-T-AC-G-G-G-A-G-GC--A-GCA-G-T-A-G-G-G-A-A--TC-TT--CG-G-C---AA-T-G-G--AC--GA-A-A--G-T--C-T-GA-C-C-G-A--GC-A--------A--C-GCC-G-C-G-T---------G-A-G--T--GA-A-G--A-A-G-G-TT----TT-CG-----------G-A-T--------C-G-T--A---AA-A-C-TC------------------------------TG-TT-G-T--T-AGA----G--A-A--G---AA-CAAG-G---A-C-G--T-T--A----------G--T---------------------AA---------------------------------C--------T-------GA-…	StaAu564	EntFa534	Enterococcus faecalis
>000014694|size:602	0.00799126	97.8%:KleOx242;97.8%:KleOx241		CC-T-AC-G-G-G-A-G-GC--A-GCA-G-T-G-G-G-G-A-A--TA-TT--GC-A-C---AA-T-G-G--GC--GC-A-A--G-C--C-T-GA-T-G-C-A--GC-C--------A--T-GCC-G-C-G-T---------G-T-A--T--GA-A-G--A-A-G-G-CC----TT-CG-----------G-G-T--------T-G-T--A---AA-G-T-AC------------------------------TT-TC-A-G--C-GGG----G--A-G--G---AA--GGC-G---A-T-A--A-G--G----------T--T---------------------AA---------------------------------T---A----A-------CC-…	KleOx242	KleOx241	Klebsiella oxytoca
>000013400|size:545	0.00798434	94.5%:KleP1010;94.5%:KleVar41		CC-T-AC-G-G-G-A-G-GC--A-GCA-G-T-G-G-G-G-A-A--TA-TT--GC-A-C---AA-T-G-G--GC--GC-A-A--G-C--C-T-GA-T-G-C-A--GC-C--------A--T-GCC-G-C-G-T---------G-T-G--T--GA-A-G--A-A-G-G-CC----TT-CG-----------G-G-T--------T-G-T--A---AA-G-C-AC------------------------------TT-TC-A-G--C-GGG----G--A-G--G---AA--GGC-G---A-T-A--A-G--G----------T--T---------------------AA---------------------------------T---A----A-------CC-…	KleP1010	KleVar41	Klebsiella pneumoniae
>000010091|size:397	0.00796264	97.8%:UndOligo;91.2%:BacPH120		CC-T-AC-G-G-G-A-G-GC--A-GCA-G-T-G-G-G-G-A-A--TT-TT--GG-A-C---AA-T-G-G--GG--GC-A-A--C-C--C-T-GA-T-C-C-A--GC-A--------A--T-GCC-G-C-G-T---------G-A-G--T--GA-A-G--A-A-G-G-CC----CT-CG-----------G-G-T--------T-G-T--A---AA-G-C-TC------------------------------TT-TT-G-T--C-AGG----G--A-A--G---AA--ACG-G---A-G-T--T-C--T----------C--T---------------------AA---------------------------------T---A----T-------AG-…	UndOligo	BacPH120	Undibacterium oligocarboniphilum
>000007459|size:645	0.00795676	97.8%:KleP1015;97.8%:KleP1009		CC-T-AC-G-G-G-A-G-GC--A-GCA-G-T-G-G-G-G-A-A--TA-TT--GC-A-C---AA-T-G-G--GC--GC-A-A--G-C--C-T-GA-T-G-C-A--GC-C--------A--T-GCC-G-C-G-T---------G-T-G--T--GA-A-G--A-A-G-G-CC----TT-CG-----------G-G-T--------T-G-T--A---AA-G-C-AC------------------------------TT-TC-A-G--C-GGG----G--A-G--G---AA--GGC-G---G-T-G--A-G--G----------T--T---------------------AA---------------------------------T---A----A-------CC-…	KleP1015	KleP1009	Klebsiella pneumoniae
>000011200|size:582	0.00793345	97.8%:StaWar47;97.8%:AciBa511		CC-T-AC-G-G-G-A-G-GC--A-GCA-G-T-A-G-G-G-A-A--TC-TT--CC-G-C---AA-T-G-G--GC--GA-A-A--G-C--C-T-GA-C-G-G-A--GC-A--------A--C-GCC-G-C-G-T---------G-A-G--T--GA-T-G--A-A-G-G-TC----TT-CG-----------G-A-T--------C-G-T--A---AA-A-C-TC------------------------------TG-TT-A-T--C-AGG----G--A-A--G---AA-CAAA-T---G-T-G--T-A--A----------G--T---------------------AA---------------------------------C--------T-------GT-…	StaWar47	AciBa511	Staphylococcus warneri
>000002356|size:375	0.00788446	96.7%:SttMit48;96.7%:SttMit46		CC-T-AC-G-G-G-A-G-GC--A-GCA-G-T-A-G-G-G-A-A--TC-TT--CG-G-C---AA-T-G-G--AC--GG-A-A--G-T--C-T-GA-C-C-G-A--GC-A--------A--C-GCC-G-C-G-T---------G-A-G--T--GA-A-G--A-A-G-G-TT----TT-CG-----------G-A-T--------C-G-T--A---AA-G-C-TC------------------------------TG-TT-G-T--A-AGA----G--A-A--G---AA-CGAG-T---G-T-G--A-G--A----------G--T---------------------GG---------------------------------A---A----A-------GT-…	SttMit48	SttMit46	Streptococcus mitis
>000013081|size:400	0.00787288	95.2%:EnrCl498;95.2%:EnrCl489		CC-T-AC-G-G-G-A-G-GC--A-GCA-G-T-G-G-G-G-A-A--TA-TT--GC-A-C---AA-T-G-G--GC--GC-A-A--G-C--C-T-GA-T-G-C-A--GC-C--------A--T-GCC-G-C-G-T---------G-T-A--T--GA-A-G--A-A-G-G-CC----TT-CG-----------G-G-T--------T-G-T--A---AA-G-T-AC------------------------------TT-TC-A-G--C-GGG----G--A-G--G---AA--GGC-G---A-C-A--G-G--G----------T--T---------------------AA---------------------------------T---A----A-------CC-…	EnrCl498	EnrCl489	Enterobacter cloacae
>000000737|size:316	0.00786182	97.8%:ShiFle90;97.8%:ShiFle86		CC-T-AC-G-G-G-A-G-GC--A-GCA-G-T-G-G-G-G-A-A--TA-TT--GC-A-C---AA-T-G-G--GC--GC-A-A--G-C--C-T-GA-T-G-C-A--GC-C--------A--T-GCC-G-C-G-T---------G-T-A--T--GA-A-G--A-A-G-G-CC----TT-CG-----------G-G-T--------T-G-T--A---AA-G-T-AC------------------------------TT-TC-A-G--C-GGG----G--A-G--G---AA--GGG-A---G-T-A--A-A--G----------T--T---------------------AA---------------------------------T---A----C-------CT-…	ShiFle90	ShiFle86	Escherichia/Shigella
>000009985|size:398	0.00785767	94.1%:AciGui12;94.1%:AciGui11		CC-T-AC-G-G-G-A-G-GC--A-GCA-G-T-G-G-G-G-A-A--TA-TT--GG-A-C---AA-T-G-G--GG--GG-A-A--C-C--C-T-GA-T-C-C-A--GC-C--------A--T-GCC-G-C-G-T---------G-T-G--T--GA-A-G--A-A-G-G-CC----TT-AT-----------G-G-T--------T-G-T--A---AA-G-C-AC------------------------------TT-TA-A-G--C-GAG----G--A-G--G---AG--GCT-C---T-C-T--T-G--G----------T--T---------------------AA---------------------------------T---A----C-------CC-…	AciGui12	AciGui11	Acinetobacter guillouiae/iwoffii
>000010976|size:240	0.00785423	96.7%:SerMa255;96.7%:OrySat70	Serratia marcescens	CC-T-AC-G-G-G-A-G-GC--A-GCA-G-T-G-G-G-G-A-A--TA-TT--GC-A-C---AA-T-G-G--GC--GC-A-A--G-C--C-T-GA-T-G-C-A--GC-C--------A--T-GCC-G-C-G-T---------G-T-G--T--GA-A-G--A-A-G-G-CC----TT-CG-----------G-G-T--------T-G-T--A---AA-G-C-AC------------------------------TT-TC-A-G--C-GAG----G--A-G--G---AA--GGT-G---G-T-G--A-G--C----------T--T---------------------AA---------------------------------T---A----C-------GC-…	SerMa255	OrySat70	Serratia marcescens
>000010820|size:554	0.00782702	96.9%:StaAu564;96.9%:EntFa534		C--T-AA-G-G-G-A-G-GC--A-GCA-G-T-A-G-G-G-A-A--TC-TT--CG-G-C---AA-T-G-G--AC--GA-A-A--G-T--C-T-GA-C-C-G-A--GC-A--------A--C-GCC-G-C-G-T---------G-A-G--T--GA-A-G--A-A-G-G-TT----TT-CG-----------G-A-T--------C-G-T--A---AA-A-C-TC------------------------------TG-TT-G-T--T-AGA----G--A-A--G---AA-CAAG-G---A-C-G--T-T--A----------G--T---------------------AA---------------------------------C--------T-------GA-…	StaAu564	EntFa534	Enterococcus faecalis
>000013441|size:635	0.00778029	94.1%:EnrCl527;94.1%:EnrCl526		CC-T-AC-G-G-G-A-G-GC--A-GCA-G-T-G-G-G-G-A-A--TA-TT--GC-A-C---AA-T-G-G--GC--GC-A-A--G-C--C-T-GA-T-G-C-A--GC-C--------A--T-GCC-G-C-G-T---------G-T---AT--GA-A-G--A-A-G-G-CC----TT-CG-----------G-G-T--------T-G-T--A---AA-G-C-AC------------------------------TT-TC-A-G--C-GGG----G--A-G--G---AA--GGC-G---A-T-A--A-G--G----------T--T---------------------AA---------------------------------T---A----A-------CC-…	EnrCl527	EnrCl526	Enterobacter cloacae
>000015935|size:464	0.00777976	90.8%:StaEp124;90.8%:StaEp123		CC-T-AC-G-G-G-A-G-GC--A-GCA-G-T-A-G-G-G-A-A--TC-TT--CC-G-C---AA-T-G-G--GC--GA-A-A--G-C--C-T-GA-C-G-G-A--GC-A--------A--C-GCC-G-C-G-T---------G-A-G--T--GA-T-G--A-A-G-G-TC----TT-CG-----------G-A-T--------C-G-T--A---AA-A-C-TC------------------------------TG-TT-A-T--T-AGG----G--A-A--G---AA-CAAA-T---G-T-G--T-A--A----------G--T---------------------AA---------------------------------C--------T-------AT-…	StaEp124	StaEp123	Staphylococcus epidermidis
>000001199|size:526	0.00777368	97.8%:CtbFr155;97.8%:CtbFr143		CC-T-AC-G-G-G-A-G-GC--A-GCA-G-T-G-G-G-G-A-A--TA-TT--GC-A-C---AA-T-G-G--GC--GC-A-A--G-C--C-T-GA-T-G-C-A--GC-C--------A--T-GCC-G-C-G-T---------G-T-A--T--GA-A-G--A-A-G-G-CC----TT-CG-----------G-G-T--------T-G-T--A---AA-G-T-AC------------------------------TT-TC-A-G--C-GAG----G--A-G--G---AA--GGC-G---T-T-G--T-G--G----------T--T---------------------AA---------------------------------T---A----A-------CC-…	CtbFr155	CtbFr143	Citrobacter freundii
>000015933|size:462	0.00776909	97.1%:EnrCl498;97.1%:EnrCl489		CC-T-AC-G-G-G-A-G-GC--A-GCA-G-T-G-G-G-G-A-A--TA-TT--GC-A-C---AA-T-G-G--GC--GC-A-A--G-C--C-T-GA-T-G-C-A--GC-C--------A--T-GCC-G-C-G-T---------G-T-A--T--GA-A-G--A-A-G-G-CC----TT-CG-----------G-G-T--------T-G-T--A---AA-G-T-AC------------------------------TT-TC-A-G--C-GGG----G--A-G--G---AA--GGC-G---A-C-A--G-G--G----------T--T---------------------AA---------------------------------T---A----A-------CC-…	EnrCl498	EnrCl489	Enterobacter cloacae
>000009855|size:588	0.00776657	94.0%:PpcDi104;94.0%:PbdDis16		CC-T-AC-G-G-G-A-G-GC--A-GCA-G-T-G-A-G-G-A-A--TA-TT--GG-T-C---AA-T-G-G--CC--GA-G-A--G-G--C-T-GA-A-C-C-A--GC-C--------A--A-GTC-G-C-G-T---------G-A-G--G--GA-T-G--A-A-G-G-TT-C--TA-TG-----------G-A-T--------C-G-T--A---AA-C-C-TC------------------------------TT-TT-A-T--A-AGG----G--A-A--T---AA-AGTG-C---G-G-G--A------------------C---------------------GT---------------------------------G-------------------…	PpcDi104	PbdDis16	Parabacteroides distasonis
>000007274|size:451	0.00773409	96.7%:KleP1002;96.7%:KlePn925		CC-T-AC-G-G-G-A-G-GC--A-GCA-G-T-G-G-G-G-A-A--TA-TT--GC-A-C---AA-T-G-G--GC--GC-A-A--G-C--C-T-GA-T-G-C-A--GC-C--------A--T-GCC-G-C-G-T---------G-T-G--T--GA-A-G--A-A-G-G-CC----TT-CG-----------G-G-T--------T-G-T--A---AA-G-C-AC------------------------------TT-TC-A-G--C-GGG----G--A-G--G---AA--GGC-G---A-T-A--A-G--G----------T--T---------------------AA---------------------------------T---A----A-------CC-…	KleP1002	KlePn925	Klebsiella pneumoniae
>000014273|size:543	0.0077213	97.8%:EnrCl529;97.8%:EnrCl528		CC-T-AC-G-G-G-A-G-GC--A-GCA-G-T-G-G-G-G-A-A--TA-TT--GC-A-C---AA-T-G-G--GC--GC-A-A--G-C--C-T-GA-T-G-C-A--GC-C--------A--T-GCC-G-C-G-T---------G-T-A--T--GA-A-G--A-A-G-G-CC----TT-CG-----------G-G-T--------T-G-T--A---AA-G-T-AC------------------------------TT-TC-A-G--C-GGG----G--A-G--G---AA--GGT-G---T-T-G--A-G--G----------T--T---------------------AA---------------------------------T---A----A-------CC-…	EnrCl529	EnrCl528	Enterobacter cloacae
>000005255|size:523	0.00771473	96.9%:StaEp124;96.9%:StaEp123		CC-T-AC-G-G-G-A-G-GC--A-GCA-G-T-A-G-G-G-A-A--TC-TT--CC-G-C---AA-T-G-G--GC--GA-A-A--G-C--C-T-GA-C-G-G-A--GC-A--------A--C-GCC-G-C-G-T---------G-A-G--T--GA-T-G--A-A-G-G-TC----TT-CG-----------G-A-T--------C-G-T--A---AA-A-C-TC------------------------------TG-TT-A-T--T-AGG----G--A-A--G---AA-CAAA-T---G-T-G--T-A--A----------G--T---------------------AA---------------------------------C--------T-------AT-…	StaEp124	StaEp123	Staphylococcus epidermidis
>000010583|size:655	0.00768637	95.2%:StaAu564;95.2%:EntFa534		CC-T-AC-G-G-G-A-G-GC--A-GCA-G-T-A-G-G-G-A-A--TC-TT--CG-G-C---AA-T-G-G--AC--GA-A-A--G-T--C-T-GA-C-C-G-A--GC-A--------A--C-GCC-G-C-G-T---------G-A-G--T--GA-A-G--A-A-G-G-TT----TT-CG-----------G-A-T--------C-G-T--A---AA-A-C-TC------------------------------TG-TT-G-T--T-AGA----G--A-A--G---AA-CAAG-G---A-C-G--T-T--A----------G--T---------------------AA---------------------------------C--------T-------GA-…	StaAu564	EntFa534	Enterococcus faecalis
>000011967|size:380	0.00765345	94.1%:VeiDisp6;94.1%:VeiDisp5		CC-T-AC-G-G-G-A-G-GC--A-GCA-G-T-G-G-G-G-A-A--TC-TT--CC-G-C---AA-T-G-G--AC--GA-A-A--G-T--C-T-GA-C-G-G-A--GC-A--------A--C-GCC-G-C-G-T---------G-A-G--T--GA-T-G--A-C-G-G-CC----TT-CG-----------G-G-T--------T-G-T--A---AA-G-C-TC------------------------------TG-TT-A-A--T-CGG----G--A-C--G---AA-AGGC-C---T-T-C--T-T--G----------C--G---------------------AA---------------------------------T---A----G-------TT-…	VeiDisp6	VeiDisp5	Veillonella dispar
>000014134|size:392	0.00764006	95.4%:StaAu564;95.4%:EntFa534		CC-T-AC-G-G-G-A-G-GC--A-GCA-G-T-A-G-G-G-A-A--TC-TT--CG-G-C---AA-T-G-G--AC--GA-A-A--G-T--C-T-GA-C-C-G-A--GC-A--------A--C-GCC-G-C-G-T---------G-A-G--T--GA-A-G--A-A-G-G-TT----TT-CG-----------G-A-T--------C-G-T--A---AA-A-C-TC------------------------------TG-TT-G-T--T-AGA----G--A-A--G---AA-CAAG-G---A-C-G--T-T--A----------G--T---------------------AA---------------------------------C--------T-------GA-…	StaAu564	EntFa534	Enterococcus faecalis
>000003784|size:556	0.00762185	97.1%:NgvSucc3;94.5%:NgvSucc2		CC-T-AC-G-G-G-A-G-GC--A-GCA-G-T-G-G-G-G-A-A--TC-TT--CC-G-C---AA-T-G-G--AC--GA-A-A--G-T--C-T-GA-C-G-G-A--GC-A--------A--C-GCC-G-C-G-T---------G-A-G--T--GA-A-G--A-A-G-G-CC----TT-CG-----------G-G-T--------T-G-T--A---AA-G-C-TC------------------------------TG-TT-A-T--T-CGG----G--A-A--G---AA-CGAT-T---C-G-T--T-T--G----------T--A---------------------AA---------------------------------T---A----A-------TG-…	NgvSucc3	NgvSucc2	Negativicoccus succinicivorans
>000006756|size:426	0.00761712	96.9%:EnrCl498;96.9%:EnrCl489		CC-T-AC-G-G-G-A-G-GC--A-GCA-G-T-G-G-G-G-A-A--TA-TT--GC-A-C---AA-T-G-G--GC--GC-A-A--G-C--C-T-GA-T-G-C-A--GC-C--------A--T-GCC-G-C-G-T---------G-T-A--T--GA-A-G--A-A-G-G-CC----TT-CG-----------G-G-T--------T-G-T--A---AA-G-T-AC------------------------------TT-TC-A-G--C-GGG----G--A-G--G---AA--GGC-G---A-C-A--G-G--G----------T--T---------------------AA---------------------------------T---A----A-------CC-…	EnrCl498	EnrCl489	Enterobacter cloacae
>000009650|size:554	0.007576	94.5%:PpcDi104;94.5%:PbdDis16		CC-T-AC-G-G-G-A-G-GC--A-GCA-G-T-G-A-G-G-A-A--TA-TT--GG-T-C---AA-T-G-G--CC--GA-G-A--G-G--C-T-GA-C-C-C-A--GC-C--------A--A-GTC-G-C-G-T---------G-A-G--G--GA-T-G--A-A-G-G-TT-C--TA-TG-----------G-A-T--------C-G-T--A---AA-C-C-TC------------------------------TT-TT-A-T--A-AGG----G--A-A--T---AA-AGTG-C---G-G-G--A------------------C---------------------GT---------------------------------G-------------------…	PpcDi104	PbdDis16	Parabacteroides distasonis
>000006989|size:137	0.00752225	98.0%:PntAg164;98.0%:PntCons2		CC-T-AC-G-G-G-A-G-GC--A-GCA-G-T-G-G-G-G-A-A--TA-TT--GC-A-C---AA-T-G-G--GC--GC-A-A--G-C--C-T-GA-T-G-C-A--GC-C--------A--T-GCC-G-C-G-T---------G-T-A--T--GA-A-G--A-A-G-G-CC----TT-CG-----------G-G-T--------T-G-T--A---AA-G-T-AC------------------------------TT-TC-A-G--C-GGG----G--A-G--G---AA--GGC-G---A-T-G--C-G--G----------T--T---------------------AA---------------------------------T---A----A-------CC-…	PntAg164	PntCons2	Pantoea agglomerans
>000011951|size:440	0.00750915	96.7%:VeiDisp6;96.7%:VeiDisp5		CC-T-AC-G-G-G-A-G-GC--A-GCA-G-T-G-G-G-G-A-A--TC-TT--CC-G-C---AA-T-G-G--AC--GA-A-A--G-T--C-T-GA-C-G-G-A--GC-A--------A--C-GCC-G-C-G-T---------G-A-G--T--GA-T-G--A-C-G-G-CC----TT-CG-----------G-G-T--------T-G-T--A---AA-G-C-TC------------------------------TG-TT-A-A--T-CGG----G--A-C--G---AA-AGGC-C---T-T-C--T-T--G----------C--G---------------------AA---------------------------------T---A----G-------TT-…	VeiDisp6	VeiDisp5	Veillonella dispar
>000001421|size:369	0.00749301	96.5%:PbtMyr22;96.5%:PbtSpe45	Phyllobacterium myrsinacearum	CC-T-AC-G-G-G-A-G-GC--A-GCA-G-T-G-G-G-G-A-A--TA-TT--GG-A-C---AA-T-G-G--GC--GC-A-A--G-C--C-T-GA-T-C-C-A--GC-C--------A--T-GCC-G-C-G-T---------G-A-G--T--GA-T-G--A-A-G-G-CC----CT-AG-----------G-G-T--------T-G-T--A---AA-G-C-TC------------------------------TT-TC-A-C--C-GGT----G--A-A--G---A-------------------------------------T---------------------AA-----------------------------------------------------…	PbtMyr22	PbtSpe45	Phyllobacterium myrsinacearum
>000007173|size:559	0.0074537	96.7%:KleP1002;96.7%:KlePn925		CC-T-AC-G-G-G-A-G-GC--A-GCA-G-T-G-G-G-G-A-A--TA-TT--GC-A-C---AA-T-G-G--GC--GC-A-A--G-C--C-T-GA-T-G-C-A--GC-C--------A--T-GCC-G-C-G-T---------G-T-G--T--GA-A-G--A-A-G-G-CC----TT-CG-----------G-G-T--------T-G-T--A---AA-G-C-AC------------------------------TT-TC-A-G--C-GGG----G--A-G--G---AA--GGC-G---A-T-A--A-G--G----------T--T---------------------AA---------------------------------T---A----A-------CC-…	KleP1002	KlePn925	Klebsiella pneumoniae
>000002837|size:526	0.00744673	95.1%:AcyNeui6;93.1%:AcyNeui4		CC-T-AC-G-G-G-A-G-GC--A-GCA-G-T-G-G-G-G-G-A--TA-TT--GC-A-C---AA-T-G-G--AC--GA-A-A--G-T--C-T-GA-T-G-C-A--GC-G--------A--C-GTC-G-T-G-T---------G-G-G--G--GA-T-G--A-A-G-G-CC----TT-CG-----------G-G-T--------T-G-T--A---AA-C-T-CC------------------------------TT-TC-G-C--C-CGC----G--G-A--A---AA-GGCA-G---G-G-T---------------------T---------------------TT---------------------------------G-------------------…	AcyNeui6	AcyNeui4	Actinomyces neuii
>000007063|size:464	0.00744505	98.0%:KleVar40;98.0%:KlePn961		CC-T-AC-G-G-G-A-G-GC--A-GCA-G-T-G-G-G-G-A-A--TA-TT--GC-A-C---AA-T-G-G--GC--GC-A-A--G-C--C-T-GA-T-G-C-A--GC-C--------A--T-GCC-G-C-G-T---------G-T-G--T--GA-A-G--A-A-G-G-CC----TT-CG-----------G-G-T--------T-G-T--A---AA-G-C-AC------------------------------TT-TC-A-G--C-GGG----G--A-G--G---AA--GGC-G---G-T-G--A-G--G----------T--T---------------------AA---------------------------------T---A----A-------CC-…	KleVar40	KlePn961	Klebsiella pneumoniae
>000002916|size:659	0.00743796	97.8%:RalPic28;97.8%:RalPic27		CC-T-AC-G-G-G-A-G-GC--A-GCA-G-T-G-G-G-G-A-A--TT-TT--GG-A-C---AA-T-G-G--GC--GA-A-A--G-C--C-T-GA-T-C-C-A--GC-A--------A--T-GCC-G-C-G-T---------G-T-G--T--GA-A-G--A-A-G-G-CC----TT-CG-----------G-G-T--------T-G-T--A---AA-G-C-AC------------------------------TT-TT-G-T--C-CGG----A--A-A--G---AA--ATG-G---C-T-C--T-G--G----------T--T---------------------AA---------------------------------T---A----C-------CT-…	RalPic28	RalPic27	Ralstonia pickettii
>000008397|size:620	0.0074313	93.7%:PpcDi105;93.7%:PpcDi102		CC-T-AC-G-G-G-A-G-GC--A-GCA-G-T-G-G-G-G-A-A--TA-TT--GC-A-C---AA-T-G-G--GC--GA-A-A--G-C--C-T-GA-T-G-C-A--GC-A--------A--C-GCC-G-C-G-T---------G-A-G--T--GA-T-G--A-A-G-G-CC----TT-CG-----------G-G-T--------C-G-T--A---AA-A-C-TC------------------------------TG-TC-C-T--C-AAG----G--A-A--G---A-------------------------------------T---------------------AA-----------------------------------------------------…	PpcDi105	PpcDi102	Clostridioides difficile
>000012529|size:625	0.007347	94.1%:ShiSon39;94.1%:Esch1638		CC-T-AC-G-G-G-A-G-GC--A-GCA-G-T-G-G-G-G-A-A--TA-TT--GC-A-C---AA-T-G-G--GC--GC-A-A--G-C--C-T-GA-T-G-C-A--GC-C--------A--T-GCC-G-C-G-T---------G-T-A--T--GA-A-G--A-A-G-G-CC----TT-CG-----------G-G-T--------T-G-T--A---AA-G-T-AC------------------------------TT-TC-A-G--C-GGG----G--A-G--G---AA--GGG-A---G-T-A--A-A--G----------T--T---------------------AA---------------------------------T---A----C-------CT-…	ShiSon39	Esch1638	Escherichia/Shigella
>000010001|size:400	0.00730835	91.4%:CrvLanc2;91.4%:CrvLance		CC-T-AC-G-G-G-A-G-GC--A-GCA-G-T-G-G-G-G-A-A--TT-TT--GG-A-C---AA-T-G-G--GC--GA-A-A--G-C--C-T-GA-T-C-C-A--GC-C--------A--T-GCC-G-C-G-T---------G-C-A--G--GA-T-G--A-A-G-G-CC----TT-CG-----------G-G-T--------T-G-T--A---AA-C-T-GC------------------------------TT-TT-G-T--A-CGG----A--A-C--G---AA--AAG-G---T-T-T--G-G--C----------C--T---------------------AA---------------------------------T---A----A-------GC-…	CrvLanc2	CrvLance	Curvibacter lanceolatus
>000009843|size:731	0.00727641	89.6%:BcsDor15;89.6%:BcsFra27	Bacteroides fragilis	CC-T-AC-G-G-G-A-G-GC--A-GCA-G-T-G-C-G-G-A-A--TA-TT--GG-T-C---AA-T-G-G--GC--GT-T-A--G-C--C-T-GA-C-C-C-A--GC-C--------A--C-GTA-G-C-G-T---------G-A-A--G--GA-T-G--A-A-G-G-CT-C--TA-TG-----------G-G-T--------C-G-T--A---AA-C-T-TC------------------------------TT-TT-A-T--A-TAA----G--A-A--T---AA-AGTG-C---A-G-T--A------------------T---------------------GT---------------------------------A-------------------…	BcsDor15	BcsFra27	Bacteroides fragilis
>000010481|size:730	0.00725472	95.2%:StaAu564;95.2%:EntFa534		CC-T-AC-G-G-G-A-G-GC--A-GCA-G-T-A-G-G-G-A-A--TC-TT--CG-G-C---AA-T-G-G--AC--GA-A-A--G-T--C-T-GA-C-C-G-A--GC-A--------A--C-GCC-G-C-G-T---------G-A-G--T--GA-A-G--A-A-G-G-TT----TT-CG-----------G-A-T--------C-G-T--A---AA-A-C-TC------------------------------TG-TT-G-T--T-AGA----G--A-A--G---AA-CAAG-G---A-C-G--T-T--A----------G--T---------------------AA---------------------------------C--------T-------GA-…	StaAu564	EntFa534	Enterococcus faecalis
>000009139|size:298	0.00724455	96.5%:FaeSpeci;85.4%:FaePrau4		CC-T-AC-G-G-G-A-G-GC--A-GCA-G-T-G-G-G-G-A-A--TA-TT--GC-A-C---AA-T-G-G--GG--GA-A-A--C-C--C-T-GA-T-G-C-A--GC-G--------A--C-GCC-G-C-G-T---------G-G-A--G--GA-A-G--A-A-G-G-TC----TT-CG-----------G-A-T--------T-G-T--A---AA-C-T-CC------------------------------TG-TT-G-T--T-GGG----G--A-A--G---A-------------------------------------T---------------------AA-----------------------------------------------------…	FaeSpeci	FaePrau4	Faecalibacterium prausnitzii
>000014658|size:807	0.00724077	96.9%:EnrCl527;96.9%:EnrCl526		CC-T-AA-G-G-G-A-G-GC--A-GCA-G-T-G-G-G-G-A-A--TA-TT--GC-A-C---AA-T-G-G--GC--GC-A-A--G-C--C-T-GA-T-G-C-A--GC-C--------A--T-GCC-G-C-G-T---------G-T-A--T--GA-A-G--A-A-G-G-CC----TT-CG-----------G-G-T--------T-G-T--A---AA-G-T-AC------------------------------TT-TC-A-G--C-GGG----G--A-G--G---AA--GGC-G---A-T-A--A-G--G----------T--T---------------------AA---------------------------------T---A----A-------CC-…	EnrCl527	EnrCl526	Enterobacter cloacae
>000007781|size:2057	0.00719528	96.7%:ClsPar22;96.7%:ClsPar21		CC-T-AC-G-G-G-A-G-GC--A-GCA-G-T-G-G-G-G-A-A--TA-TT--GC-A-C---AA-T-G-G--GG--GA-A-A--C-C--C-T-GA-T-G-C-A--GC-A--------A--C-GCC-G-C-G-T---------G-A-G--T--GA-T-G--A-C-G-G-CC----TT-CG-----------G-G-T--------T-G-T--A---AA-G-C-TC------------------------------TG-TC-T-T--T-GGG----G--A-C--G---A-------------------------------------T---------------------AA-----------------------------------------------------…	ClsPar22	ClsPar21	Clostridium paraputrificum
>000010475|size:233	0.00718837	95.2%:StaAu564;95.2%:EntFa534		CC-T-AC-G-G-G-A-G-GC--A-GCA-G-T-A-G-G-G-A-A--TC-TT--CG-G-C---AA-T-G-G--AC--GA-A-A--G-T--C-T-GA-C-C-G-A--GC-A--------A--C-GCC-G-C-G-T---------G-A-G--T--GA-A-G--A-A-G-G-TT----TT-CG-----------G-A-T--------C-G-T--A---AA-A-C-TC------------------------------TG-TT-G-T--T-AGG----G--A-A--G---AA-CAAG-G---A-C-G--T-T--A----------G--T---------------------AA---------------------------------C--------T-------GA-…	StaAu564	EntFa534	Enterococcus faecalis
>000007940|size:737	0.00715352	95.1%:FinMag11;95.1%:FinMag10		CC-T-AC-G-G-G-A-G-GC--A-GCA-G-T-G-G-G-G-A-A--TA-TT--GC-A-C---AA-T-G-G--GG--GG-A-A--C-C--C-T-GA-T-G-C-A--GC-G--------A--C-GCC-G-C-G-T---------G-A-A--C--GA-A-G--A-A-G-G-TA----TT-CG-----------T-A-T--------C-G-T--A---AA-G-T-TC------------------------------TG-TC-C-T--A-TGG----G--A-A--G---A-------------------------------------T---------------------AA-----------------------------------------------------…	FinMag11	FinMag10	Finegoldia magna
>000012855|size:1666	0.00714115	96.7%:KleOx239;96.7%:KleOx235		CC-T-AC-G-G-G-A-G-GC--A-GCA-G-T-G-G-G-G-A-A--TA-TT--GC-A-C---AA-T-G-G--GC--GC-A-A--G-C--C-T-GA-T-G-C-A--GC-C--------A--T-GCC-G-C-G-T---------G-T-A--T--GA-A-G--A-A-G-G-CC----TT-CG-----------G-G-T--------T-G-T--A---AA-G-T-AC------------------------------TT-TC-A-G--C-GGG----G--A-G--G---AA--GGG-A---G-T-G--A-G--G----------T--T---------------------AA---------------------------------T---A----A-------CC-…	KleOx239	KleOx235	Klebsiella oxytoca
>000005378|size:1208	0.00713878	95.2%:StaEp124;95.2%:StaEp123		CC-T-AC-G-G-G-A-G-GC--A-GCA-G-T-A-G-G-G-A-A--TC-TT--CC-G-C---AA-T-G-G--GC--GA-A-A--G-C--C-T-GA-C-G-G-A--GC-A--------A--C-GCC-G-C-G-T---------G-A-G--T--GA-T-G--A-A-G-G-TC----TT-CG-----------G-A-T--------C-G-T--A---AA-A-C-TC------------------------------TG-TT-A-T--T-AGG----G--A-A--G---AA-TAAA-T---G-T-G--T-A--A----------G--T---------------------AA---------------------------------C--------T-------AT-…	StaEp124	StaEp123	Staphylococcus epidermidis
>000008517|size:373	0.00713732	95.1%:AauOctav;84.6%:AauSpec5		CC-T-AC-G-G-G-A-G-GC--A-GCA-G-T-G-G-G-G-A-A--TT-TT--GC-A-C---AA-T-G-G--GG--GA-A-A--C-C--C-T-GA-T-G-C-A--GC-G--------A--C-GCC-G-C-G-T---------G-A-T--T--TA---G--A-A-G-G-CC----TT-CG-----------G-G-T--------T-G-T--A---AA-A-A-TC------------------------------TT-TT-G-T--A-TAG----G--A-A--G---A-------------------------------------A---------------------AA-----------------------------------------------------…	AauOctav	AauSpec5	Anaerococcus octavius
>000014160|size:509	0.00711597	94.1%:StaAu564;94.1%:EntFa534		CC-T-AC-G-G-G-A-G-GC--A-GCA-G-T-A-G-G-G-A-A--TC-TT--CG-G-C---AA-T-G-G--AC--GA-A-A--G-T--C-T-GA-C-C-G-A--GC-A--------A--C-GCC-G-C-G-T---------G-A-G--T--GA-A-G--A-A-G-G-TT----TT-CG-----------G-A-T--------C-G-T--A---AA-A-C-TC------------------------------TG-TT-G-T--T-AGA----G--A-A--G---AA-CAAG-G---A-C-G--T-T--A----------G--T---------------------AA---------------------------------C--------T-------GA-…	StaAu564	EntFa534	Enterococcus faecalis
>000002166|size:489	0.00710578	95.2%:CrvLanc2;95.2%:CrvLance		CC-T-AC-G-G-G-A-G-GC--A-GCA-G-T-G-G-G-G-A-A--TT-TT--GG-A-C---AA-T-G-G--GC--GA-A-A--G-C--C-T-GA-T-C-C-A--GC-C--------A--T-GCC-G-C-G-T---------G-C-A--G--GA-T-G--A-A-G-G-CC----TT-CG-----------G-G-T--------T-G-T--A---AA-C-T-GC------------------------------TT-TT-G-T--A-CGG----A--A-C--G---AA--AAG-G---T-T-T--G-G--C----------C--T---------------------AA---------------------------------T---A----A-------GC-…	CrvLanc2	CrvLance	Curvibacter lanceolatus
>000000504|size:477	0.00709605	96.9%:StaEp124;96.9%:StaEp123		CC-T-AC-G-G-G-A-G-GC--A-GCA-G-T-A-G-G-G-A-A--TC-TT--CC-G-C---AA-T-G-G--GC--GA-A-A--G-C--C-T-GA-C-G-G-A--GC-A--------A--C-GCC-G-C-G-T---------G-A-G--T--GA-T-G--A-A-G-G-TC----TT-CG-----------G-A-T--------C-G-T--A---AA-A-C-TC------------------------------TG-TT-A-T--T-AGG----G--A-A--G---AA-CAAA-T---G-T-G--T-A--A----------G--T---------------------AA---------------------------------C--------T-------AT-…	StaEp124	StaEp123	Staphylococcus epidermidis
>000008251|size:684	0.00708871	97.7%:AauSpec5;97.7%:AauSpeci		CC-T-AC-G-G-G-A-G-GC--A-GCA-G-T-G-G-G-G-A-A--TT-TT--GC-A-C---AA-T-G-G--GG--GA-A-A--C-C--C-T-GA-T-G-C-A--GC-G--------A--C-GCC-G-C-G-T---------G-A-T--T--TA---G--A-A-G-G-CC----TT-CG-----------G-G-T--------T-G-T--A---AA-A-A-TC------------------------------TT-TT-G-T--A-TAG----G--A-A--G---A-------------------------------------A---------------------AA-----------------------------------------------------…	AauSpec5	AauSpeci	Anaerococcus provencensis
>000014787|size:644	0.00704798	95.6%:KleP1010;95.6%:KleVar41		CC-T-AA-G-G-G-A-G-GC--A-GCA-G-T-G-G-G-G-A-A--TA-TT--GC-A-C---AA-T-G-G--GC--GC-A-A--G-C--C-T-GA-T-G-C-A--GC-C--------A--T-GCC-G-C-G-T---------G-T-G--T--GA-A-G--A-A-G-G-CC----TT-CG-----------G-G-T--------T-G-T--A---AA-G-C-AC------------------------------TT-TC-A-G--C-GGG----G--A-G--G---AA--GGC-G---A-T-A--A-G--G----------T--T---------------------AA---------------------------------T---A----A-------CC-…	KleP1010	KleVar41	Klebsiella pneumoniae
>000001541|size:654	0.0070362	98.6%:CorPse92;98.6%:CorPse91		CC-T-AA-G-G-G-A-G-GC--A-GCA-G-T-G-G-G-G-A-A--TA-TT--GC-A-C---AA-T-G-G--GC--GC-A-A--G-C--C-T-GA-T-G-C-A--GC-G--------A--C-GCC-G-C-G-T---------G-G-G--G--GA-T-G--A-C-G-G-CC----TT-CG-----------G-G-T--------T-G-T--A---AA-C-T-CC------------------------------TT-TC-G-C--T-AGG----G--A-C--G---AA--G-C-T-----------------------------T---------------------TT-----------------------------------------------------…	CorPse92	CorPse91	Corynebacterium tuberculostearicum
>000011130|size:588	0.00700191	94.1%:StaAu565;94.1%:StaAu563		CC-T-AC-G-G-G-A-G-GC--A-GCA-G-T-A-G-G-G-A-A--TC-TT--CC-G-C---AA-T-G-G--GC--GA-A-A--G-C--C-T-GA-C-G-G-A--GC-A--------A--C-GCC-G-C-G-T---------G-A-G--T--GA-T-G--A-A-G-G-TC----TT-CG-----------G-A-T--------C-G-T--A---AA-A-C-TC------------------------------TG-TT-A-T--T-AGG----G--A-A--G---AA-CATA-T---G-T-G--T-A--A----------G--T---------------------AA---------------------------------C--------T-------GT-…	StaAu565	StaAu563	Staphylococcus aureus
>000005401|size:349	0.00700117	95.2%:KleOx153;95.2%:KleOx103		CC-T-AC-G-G-G-A-G-GC--A-GCA-G-T-G-G-G-G-A-A--TA-TT--GC-A-C---AA-T-G-G--GC--GC-A-A--G-C--C-T-GA-T-G-C-A--GC-C--------A--T-GCC-G-C-G-T---------G-T-A--T--GA-A-G--A-A-G-G-CC----TT-CG-----------G-G-T--------T-G-T--A---AA-G-T-AC------------------------------TT-TC-A-G--C-GGG----G--A-G--G---AA--GGG-A---G-T-A--A-G--G----------T--T---------------------AA---------------------------------T---A----A-------CC-…	KleOx153	KleOx103	Klebsiella oxytoca
>000002069|size:388	0.00694477	96.7%:SttAng69;96.7%:SttAng68		CC-T-AC-G-G-G-A-G-GC--A-GCA-G-T-A-G-G-G-A-A--TC-TT--CG-G-C---AA-T-G-G--GG--GG-A-A--C-C--C-T-GA-C-C-G-A--GC-A--------A--C-GCC-G-C-G-T---------G-A-G--T--GA-A-G--A-A-G-G-TT----TT-CG-----------G-A-T--------C-G-T--A---AA-G-C-TC------------------------------TG-TT-G-T--T-AAG----G--A-A--G---AA-CGAG-T---G-T-G--A-G--A----------A--T---------------------GG---------------------------------A---A----A-------GT-…	SttAng69	SttAng68	Streptococcus anginosus
>000009422|size:503	0.00693164	91.4%:BcsFra39;91.4%:BcsFra38		CC-T-AC-G-G-G-A-G-GC--A-GCA-G-T-G-C-G-G-A-A--TA-TT--GG-T-C---AA-T-G-G--GC--GC-T-A--G-C--C-T-GA-C-C-C-A--GC-C--------A--A-GTA-G-C-G-T---------G-A-A--G--GA-T-G--A-A-G-G-CT-C--TA-TG-----------G-G-T--------C-G-T--A---AA-C-T-TC------------------------------TT-TT-A-T--A-TAA----G--A-A--T---AA-AGTG-C---A-G-T--A------------------T---------------------GT---------------------------------A-------------------…	BcsFra39	BcsFra38	Bacteroides fragilis
>000001358|size:311	0.00691295	96.5%:EubHall4;90.5%:EubHall3	[Eubacterium] hallii	CC-T-AC-G-G-G-A-G-GC--A-GCA-G-T-G-G-G-G-A-A--TA-TT--GC-A-C---AA-T-G-G--GG--GA-A-A--C-C--C-T-GA-T-G-C-A--GC-A--------A--C-GCC-G-C-G-T---------G-A-G--T--GA-A-G--A-A-G-T-AT----TT-CG-----------G-T-A--------T-G-T--A---AA-G-C-TC------------------------------TA-TC-A-G--C-AGG----G--A-A--G---A-------------------------------------T---------------------AA-----------------------------------------------------…	EubHall4	EubHall3	[Eubacterium] hallii
>000001767|size:297	0.00690535	95.6%:LacAnim8;95.6%:LacAnim6		CC-T-AA-G-G-G-A-G-GC--A-GCA-G-T-A-G-G-G-A-A--TC-TT--CC-A-C---AA-T-G-G--GC--GA-A-A--G-C--C-T-GA-T-G-G-A--GC-A--------A--C-GCC-G-C-G-T---------G-G-G--T--GA-A-G--A-A-G-G-TC----TT-CG-----------G-A-T--------C-G-T--A---AA-A-C-CC------------------------------TG-TT-G-T--T-AGA----G--A-A--G---AA-AGTG-C---G-T-G--A-G--A----------G--T---------------------AA---------------------------------C--------T-------GT-…	LacAnim8	LacAnim6	Lactobacillus animalis
>000008040|size:429	0.00689825	96.5%:ClsPer92;96.5%:ClsPer91		CC-T-AC-G-G-G-A-G-GC--A-GCA-G-T-G-G-G-G-A-A--TA-TT--GC-A-C---AA-T-G-G--GG--GA-A-A--C-C--C-T-GA-T-G-C-A--GC-A--------A--C-GCC-G-C-G-T---------G-A-G--T--GA-T-G--A-A-G-G-TT----TT-CG-----------G-A-T--------C-G-T--A---AA-G-C-TC------------------------------TG-TC-T-T--T-GGG----G--A-A--G---A-------------------------------------T---------------------AA-----------------------------------------------------…	ClsPer92	ClsPer91	Clostridium perfringens
>000012039|size:464	0.00688529	96.7%:StaEp124;96.7%:StaEp123		CC-T-AC-G-G-G-A-G-GC--A-GCA-G-T-A-G-G-G-A-A--TC-TT--CC-G-C---AA-T-G-G--GC--GA-A-A--G-C--C-T-GA-C-G-G-A--GC-A--------A--C-GCC-G-C-G-T---------G-A-G--T--GA-T-G--A-A-G-G-TC----TT-CG-----------G-A-T--------C-G-T--A---AA-A-C-TC------------------------------TG-TT-A-T--T-AGG----G--A-A--G---AA-CAAA-T---G-T-G--T-A--A----------G--T---------------------AA---------------------------------C--------T-------AT-…	StaEp124	StaEp123	Staphylococcus epidermidis
>000008257|size:360	0.00686864	94.2%:AauSpec5;94.2%:AauSpeci		CC-T-AC-G-G-G-A-G-GC--A-GCA-G-T-G-G-G-G-A-A--TT-TT--GC-A-C---AA-T-G-G--GG--GG-A-A--C-C--C-T-GA-T-G-C-A--GC-G--------A--C-GCC-G-C-G-T---------G-A-T--T--TA---G--A-A-G-G-CC----TT-CG-----------G-G-T--------T-G-T--A---AA-A-A-TC------------------------------TT-TT-G-T--A-TAG----G--A-A--G---A-------------------------------------A---------------------AA-----------------------------------------------------…	AauSpec5	AauSpeci	Anaerococcus provencensis
>000009872|size:690	0.0068683	95.1%:BcsDor15;95.1%:BcsFra27		CC-T-AC-G-G-G-A-G-GC--A-GCA-G-T-G-A-G-G-A-A--TA-TT--GG-T-C---AA-T-G-G--GC--GT-T-A--G-C--C-T-GA-A-C-C-A--GC-C--------A--A-GTA-G-C-G-T---------G-A-A--G--GA-T-G--A-A-G-G-CT-C--TA-TG-----------G-G-T--------C-G-T--A---AA-C-T-TC------------------------------TT-TT-A-T--A-TAA----G--A-A--T---AA-AGTG-C---A-G-T--A------------------T---------------------GT---------------------------------A-------------------…	BcsDor15	BcsFra27	Bacteroides fragilis
>000000883|size:680	0.00685386	97.7%:BrbFaec9;97.7%:BrbFaec8	Brachybacterium conglomeratum	CC-T-AC-G-G-G-A-G-GC--A-GCA-G-T-G-G-G-G-A-A--TA-TT--GC-A-C---AA-T-G-G--GC--GA-A-A--G-C--C-T-GA-T-G-C-A--GC-G--------A--C-GCC-G-C-G-T---------G-G-G--G--GA-T-G--A-C-G-G-CC----TT-CG-----------G-G-T--------T-G-T--A---AA-C-C-CC------------------------------TT-TC-A-G--T-AGG----G--A-A--G---AA--G-C-------------------------------G---------------------AG---------------------------------A-------------------…	BrbFaec9	BrbFaec8	Brachybacterium conglomeratum
>000009866|size:298	0.00682062	95.1%:PbdDist9;92.5%:PbdDis25		CC-T-AC-G-G-G-A-G-GC--A-GCA-G-T-G-A-G-G-A-A--TA-TT--GG-T-C---AA-T-G-G--GC--GT-A-A--G-C--C-T-GA-C-C-C-A--GC-C--------A--A-GTC-G-C-G-T---------G-A-G--G--GA-T-G--A-A-G-G-TT-C--TA-TG-----------G-A-T--------C-G-T--A---AA-C-C-TC------------------------------TT-TT-A-T--A-AGG----G--A-A--T---AA-AGTG-C---G-G-G--A------------------C---------------------GT---------------------------------G-------------------…	PbdDist9	PbdDis25	Parabacteroides distasonis
>000013798|size:403	0.00682061	96.5%:ClsPer92;96.5%:ClsPer91		CC-T-AC-G-G-G-A-G-GC--A-GCA-G-T-G-G-G-G-A-A--TA-TT--GC-A-C---AA-T-G-G--GG--GA-A-A--C-C--C-T-GA-T-G-C-A--GC-A--------A--C-GCC-G-C-G-T---------G-A-G--T--GA-T-G--A-A-G-G-TT----TT-CG-----------G-A-T--------C-G-T--A---AA-G-C-TC------------------------------TG-TC-T-T--T-GGG----G--A-A--G---A-------------------------------------T---------------------AA-----------------------------------------------------…	ClsPer92	ClsPer91	Clostridium perfringens
>000002839|size:499	0.00681964	95.3%:AcyNeui6;93.3%:AcyNeui4		CC-T-AC-G-G-G-A-G-GC--A-GCA-G-T-G-G-G-G-G-A--TA-TT--GC-A-C---AA-T-G-G--AC--GG-A-A--G-T--C-T-GA-T-G-C-A--GC-G--------A--C-GTC-G-T-G-T---------G-G-G--G--GA-T-G--A-A-G-G-CC----TT-CG-----------G-G-T--------T-G-T--A---AA-C-T-CC------------------------------TT-TC-G-C--C-CGC----G--G-A--A---AA-GGCA-G---G-G-T---------------------T---------------------TT---------------------------------G-------------------…	AcyNeui6	AcyNeui4	Actinomyces neuii
>000009990|size:605	0.00680171	94.1%:AciGui12;94.1%:AciGui11		CC-T-AC-G-G-G-A-G-GC--A-GCA-G-T-G-G-G-G-A-A--TA-TT--GG-A-C---AA-T-G-G--GG--GG-A-A--C-C--C-T-GA-T-C-C-A--GC-C--------A--T-GCC-G-C-G-T---------G-T-G--T--GA-A-G--A-A-G-G-CC----TT-AT-----------G-G-T--------T-G-T--A---AA-G-C-AC------------------------------TT-TA-A-G--C-GAG----G--A-G--G---AG--GCT-C---T-C-T--T-G--G----------T--T---------------------AA---------------------------------T---A----C-------CC-…	AciGui12	AciGui11	Acinetobacter guillouiae/iwoffii
>000012955|size:556	0.00678768	94.5%:KleP1010;94.5%:KleVar41		CC-T-AC-G-G-G-A-G-GC--A-GCA-G-T-G-G-G-G-A-A--TA-TT--GC-A-C---AA-T-G-G--GC--GC-A-A--G-C--C-T-GA-T-G-C-A--GC-C--------A--T-GCC-G-C-G-T---------G-T-G--T--GA-A-G--A-A-G-G-CC----TT-CG-----------G-G-T--------T-G-T--A---AA-G-C-AC------------------------------TT-TC-A-G--C-GGG----G--A-G--G---AA--GGC-G---A-T-A--A-A--G----------T--T---------------------AA---------------------------------T---A----A-------CC-…	KleP1010	KleVar41	Klebsiella pneumoniae
>000013607|size:474	0.00678182	97.8%:KleOxy42;95.2%:KleP1002		CC-T-AC-G-G-G-A-G-GC--A-GCA-G-T-G-G-G-G-A-A--TA-TT--GC-A-C---AA-T-G-G--GC--GC-A-A--G-C--C-T-GA-T-G-C-A--GC-C--------A--T-GCC-G-C-G-T---------G-T-G--T--GA-A-G--A-A-G-G-CC----TT-CG-----------G-G-T--------T-G-T--A---AA-G-C-AC------------------------------TT-TC-A-G--C-GGG----G--A-G--G---AA--GGC-G---A-T-A--A-G--G----------T--T---------------------AA---------------------------------T---A----A-------CC-…	KleOxy42	KleP1002	Klebsiella oxytoca
>000009251|size:489	0.00675758	86.3%:BcsFra39;86.3%:BcsFra38		CC-T-AC-G-G-G-A-G-GC--A-GCA-G-T-G-C-G-G-A-A--TA-TT--GG-T-C---AA-T-G-G--GC--GC-T-A--G-C--C-T-GA-C-C-C-A--GC-C--------A--C-GTC-G-C-G-T---------G-A-A--G--GA-T-G--A-A-G-G-CT-C--TA-TG-----------G-G-T--------C-G-T--A---AA-C-T-TC------------------------------TT-TT-A-T--A-TAA----G--A-A--T---AA-AGTG-C---A-G-T--A------------------T---------------------GT---------------------------------A-------------------…	BcsFra39	BcsFra38	Bacteroides fragilis
>000013680|size:670	0.00675148	95.2%:KleP1002;95.2%:KlePn925		CC-T-AC-G-G-G-A-G-GC--A-GCA-G-T-G-G-G-G-A-A--TA-TT--GC-A-C---AA-T-G-G--GC--GC-A-A--G-C--C-T-GA-T-G-C-A--GC-C--------A--T-GCC-G-C-G-T---------G-T-G--T--GA-A-G--A-A-G-G-CC----TT-CG-----------G-G-T--------T-G-T--A---AA-G-C-AC------------------------------TT-TC-A-G--C-GGG----G--A-G--G---AA--GGC-G---A-T-A--A-G--G----------T--T---------------------AA---------------------------------T---A----A-------CC-…	KleP1002	KlePn925	Klebsiella pneumoniae
>000010707|size:589	0.00674029	95.4%:EntFa540;95.4%:EntFa539		CC-T-AC-G-G-G-A-G-GC--A-GCA-G-T-A-G-G-G-A-A--TC-TT--CG-G-C---AA-T-G-G--AC--GA-A-A--G-T--C-T-GA-C-C-G-A--GC-A--------A--C-GCC-G-C-G-T---------G-A-G--T--GA-A-G--A-A-G-G-TT----TT-CG-----------G-A-T--------C-G-T--A---AA-A-C-TC------------------------------TG-TT-G-T--T-AGA----G--A-A--G---AA-CAAG-G---A-T-G--A-G--A----------T--T---------------------AA---------------------------------C--------T-------GT-…	EntFa540	EntFa539	Enterococcus faecium
>000001553|size:348	0.00672112	97.7%:CorPse92;97.7%:CorPse91		CC-T-AC-G-G-G-A-G-GC--A-GCA-G-T-G-G-G-G-A-A--TA-TT--GC-A-C---AA-T-G-G--GC--GC-A-A--G-C--C-T-GA-T-G-C-A--GC-G--------A--C-GCC-G-C-G-T---------G-G-G--G--GA-T-G--A-C-G-G-CC----TT-CG-----------G-G-T--------T-G-T--A---AA-C-T-CC------------------------------TT-TC-G-C--T-AGG----G--A-C--G---AA--G-C-T-----------------------------T---------------------TT-----------------------------------------------------…	CorPse92	CorPse91	Corynebacterium tuberculostearicum
>000003140|size:270	0.00671129	94.0%:BcsPleb5;94.0%:BcsPleb4	Bacteroides plebeius	CC-T-AC-G-G-G-A-G-GC--A-GCA-G-T-G-A-G-G-A-A--TA-TT--GG-T-C---AA-T-G-G--AC--GA-G-A--G-T--C-T-GA-A-C-C-A--GC-C--------A--A-GTA-G-C-G-T---------G-A-A--G--GA-T-G--A-A-G-G-TC-C--TA-CG-----------G-A-T--------T-G-T--A---AA-C-T-TC------------------------------TT-TT-A-T--A-AGG----G--A-A--T---AA-ACCC-T---C-C-C--A------------------C---------------------GT---------------------------------G-------------------…	BcsPleb5	BcsPleb4	Bacteroides plebeius
>000013106|size:667	0.00670996	94.1%:KleP1010;94.1%:KleVar41		CC-T-AC-G-G-G-A-G-GC--A-GCA-G-T-G-G-G-G-A-A--TA-TT--GC-A-C---AA-T-G-G--GC--GC-A-A--G-C--C-T-GA-T-G-C-A--GC-C--------A--T-GCC-G-C-G-T---------G-T-G--T--GA-A-G--A-A-G-G-CC----TT-CG-----------G-G-T--------T-G-T--A---AA-G-C-AC------------------------------TT-TC-A-G--C-GGG----G--A-G--G---AA--GGC-G---A-T-A--A-G--G----------T--T---------------------AA---------------------------------T---A----A-------CC-…	KleP1010	KleVar41	Klebsiella pneumoniae
>000010867|size:380	0.00669602	96.9%:KleOx234;96.9%:KleOx231		CC-T-AA-G-G-G-A-G-GC--A-GCA-G-T-G-G-G-G-A-A--TA-TT--GC-A-C---AA-T-G-G--GC--GC-A-A--G-C--C-T-GA-T-G-C-A--GC-C--------A--T-GCC-G-C-G-T---------G-T-A--T--GA-A-G--A-A-G-G-CC----TT-CG-----------G-G-T--------T-G-T--A---AA-G-T-AC------------------------------TT-TC-A-G--C-GGG----G--A-G--G---AA--GGT-G---T-T-G--A-G--G----------T--T---------------------AA---------------------------------T---A----A-------CC-…	KleOx234	KleOx231	Klebsiella oxytoca
>000010605|size:1185	0.00669348	89.5%:StaAu564;89.5%:EntFa534		CC-T-AC-G-G-G-A-G-GC--A-GCA-G-T-A-G-G-G-A-A--TC-TT--CC-G-C---AA-T-G-G--GC--GA-A-A--G-C--C-T-GA-C-G-G-A--GC-A--------A--C-GCC-G-C-G-T---------G-A-G--T--GA-A-G--A-A-G-G-TT----TT-CG-----------G-A-T--------C-G-T--A---AA-A-C-TC------------------------------TG-TT-G-T--T-AGA----G--A-A--G---AA-CAAG-G---A-C-G--T-T--A----------G--T---------------------AA---------------------------------C--------T-------GA-…	StaAu564	EntFa534	Enterococcus faecalis
>000010848|size:432	0.00669297	97.1%:KleOx234;97.1%:KleOx231		CC-T-AC-G-G-G-A-G-GC--A-GCA-G-T-G-G-G-G-A-A--TA-TT--GC-A-C---AA-T-G-G--GC--GC-A-A--G-C--C-T-GA-T-G-C-A--GC-C--------A--T-GCC-G-C-G-T---------G-T-A--T--GA-A-G--A-A-G-G-CC----TT-CG-----------G-G-T--------T-G-T--A---AA-G-T-AC------------------------------TT-TC-A-G--C-GGG----G--A-G--G---AA--GGT-G---T-T-G--A-G--G----------T--T---------------------AA---------------------------------T---A----A-------CC-…	KleOx234	KleOx231	Klebsiella oxytoca
>000003868|size:598	0.00665557	96.7%:DftAci28;96.7%:DftAci27		CC-T-AC-G-G-G-A-G-GC--A-GCA-G-T-G-G-G-G-A-A--TT-TT--GG-A-C---AA-T-G-G--GC--GA-A-A--G-C--C-T-GA-T-C-C-A--GC-A--------A--T-GCC-G-C-G-T---------G-C-A--G--GA-T-G--A-A-G-G-CC----TT-CG-----------G-G-T--------T-G-T--A---AA-C-T-GC------------------------------TT-TT-G-T--A-CGG----A--A-C--G---AA--AAA-G---C-T-T--C-T--C----------C--T---------------------AA---------------------------------T---A----C-------GA-…	DftAci28	DftAci27	Delftia acidovorans
>000005679|size:443	0.00658641	99.8%:KleOx209;99.8%:KleOx142		CC-T-AC-G-G-G-A-G-GC--A-GCA-G-T-G-G-G-G-A-A--TA-TT--GC-A-C---AA-T-G-G--GC--GC-A-A--G-C--C-T-GA-T-G-C-A--GC-C--------A--T-GCC-G-C-G-T---------G-T-A--T--GA-A-G--A-A-G-G-CC----TT-CG-----------G-G-T--------T-G-T--A---AA-G-T-AC------------------------------TT-TC-A-G--C-GGG----G--A-G--G---AA--GGG-A---G-T-A--A-G--G----------T--T---------------------AA---------------------------------T---A----A-------CC-…	KleOx209	KleOx142	Klebsiella oxytoca
>000001379|size:415	0.00657289	93.7%:AauOctav;83.7%:AauSpec5		CC-T-AC-G-G-G-A-G-GC--A-GCA-G-T-G-G-G-G-A-A--TT-TT--GC-A-C---AA-T-G-G--GG--GA-A-A--C-C--C-T-GA-T-G-C-A--GC-G--------A--C-GCC-G-C-G-T---------G-A-T--T--TA---G--A-A-G-G-CC----TT-CG-----------G-G-T--------T-G-T--A---AA-A-A-TC------------------------------TT-TT-G-T--A-TAG----G--A-A--G---A-------------------------------------A---------------------AA-----------------------------------------------------…	AauOctav	AauSpec5	Anaerococcus octavius
>000009381|size:287	0.00656885	95.3%:PbdDis24;93.3%:PbdDist6		CC-T-AC-G-G-G-A-G-GC--A-GCA-G-T-G-A-G-G-A-A--TA-TT--GG-T-C---AA-T-G-G--GC--GC-G-A--G-C--C-T-GA-C-C-C-A--GC-C--------A--A-GTC-G-C-G-T---------G-A-G--G--GA-T-G--A-A-G-G-TT-C--TA-TG-----------G-A-T--------C-G-T--A---AA-C-C-TC------------------------------TT-TT-A-T--A-AGG----G--A-A--T---AA-AGTG-C---G-G-G--A------------------C---------------------GT---------------------------------G-------------------…	PbdDis24	PbdDist6	Parabacteroides distasonis
>000004311|size:389	0.00655467	99.8%:BcsThe20;99.8%:BcsThe16		CC-T-AC-G-G-G-A-G-GC--A-GCA-G-T-G-A-G-G-A-A--TA-TT--GG-T-C---AA-T-G-G--GC--GC-A-G--G-C--C-T-GA-A-C-C-A--GC-C--------A--A-GTA-G-C-G-T---------G-A-A--G--GA-T-G--A-C-T-G-CC-C--TA-TG-----------G-G-T--------T-G-T--A---AA-C-T-TC------------------------------TT-TT-A-T--A-TGG----G--A-A--T---AA-AGTT-T---T-C-C--A------------------C---------------------GT---------------------------------G-------------------…	BcsThe20	BcsThe16	Bacteroides thetaiotaomicron
>000010183|size:473	0.00652067	93.9%:SttSa536;93.9%:SttSa535		CC-T-AC-G-G-G-A-G-GC--A-GCA-G-T-A-G-G-G-A-A--TC-TT--CG-G-C---AA-T-G-G--AC--GA-A-A--G-T--C-T-GA-C-C-G-A--GC-A--------A--C-GCC-G-C-G-T---------G-A-G--T--GA-A-G--A-A-G-G-TT----TT-CG-----------G-A-T--------C-G-T--A---AA-G-C-TC------------------------------TG-TT-G-T--A-AGT----C--A-A--G---AA-CGAG-T---G-T-G--A-G--A----------G--T---------------------GG---------------------------------A---A----A-------GT-…	SttSa536	SttSa535	Streptococcus salivarius
>000002355|size:489	0.00650951	95.2%:SttMit48;95.2%:SttMit46		CC-T-AC-G-G-G-A-G-GC--A-GCA-G-T-A-G-G-G-A-A--TC-TT--CG-G-C---AA-T-G-G--AC--GG-A-A--G-T--C-T-GA-C-C-G-A--GC-A--------A--C-GCC-G-C-G-T---------G-A-G--T--GA-A-G--A-A-G-G-TT----TT-CG-----------G-A-T--------C-G-T--A---AA-G-C-TC------------------------------TG-TT-G-T--A-AGA----G--A-A--G---AA-CGAG-T---G-T-G--A-G--A----------G--T---------------------GG---------------------------------A---A----A-------GT-…	SttMit48	SttMit46	Streptococcus mitis
>000006401|size:289	0.00649783	97.1%:KleP1010;97.1%:KleVar41		CC-T-AC-G-G-G-A-G-GC--A-GCA-G-T-G-G-G-G-A-A--TA-TT--GC-A-C---AA-T-G-G--GC--GC-A-A--G-C--C-T-GA-T-G-C-A--GC-C--------A--T-GCC-G-C-G-T---------G-T-G--T--GA-A-G--A-A-G-G-CC----TT-CG-----------G-G-T--------T-G-T--A---AA-G-C-AC------------------------------TT-TC-A-G--C-GGG----G--A-G--G---AA--GGC-G---A-T-A--A-G--G----------T--T---------------------AA---------------------------------T---A----A-------CC-…	KleP1010	KleVar41	Klebsiella pneumoniae
>000014285|size:296	0.00649638	96.7%:EnrCl529;96.7%:EnrCl528		CC-T-AC-G-G-G-A-G-GC--A-GCA-G-T-G-G-G-G-A-A--TA-TT--GC-A-C---AA-T-G-G--GC--GC-A-A--G-C--C-T-GA-T-G-C-A--GC-C--------A--T-GCC-G-C-G-T---------G-T-A--T--GA-A-G--A-A-G-G-CC----TT-CG-----------G-G-T--------T-G-T--A---AA-G-T-AC------------------------------TT-TC-A-G--C-GGG----G--A-G--G---AA--GGT-G---T-T-G--A-G--G----------T--T---------------------AA---------------------------------T---A----A-------CC-…	EnrCl529	EnrCl528	Enterobacter cloacae
>000010478|size:552	0.0064786	95.2%:StaAu564;95.2%:EntFa534		CC-T-AC-G-G-G-A-G-GC--A-GCA-G-T-A-G-G-G-A-A--TC-TT--CG-G-C---AA-T-G-G--AC--GA-A-A--G-T--C-T-GA-C-C-G-A--GC-A--------A--C-GCC-G-C-G-T---------G-A-G--T--GA-A-G--A-A-G-G-TT----TT-CG-----------G-A-T--------C-G-T--A---AA-A-C-TC------------------------------TG-TT-G-T--T-AGA----G--A-A--G---AA-CAAG-G---A-C-G--T-T--A----------G--T---------------------AA---------------------------------C--------T-------GA-…	StaAu564	EntFa534	Enterococcus faecalis
>000014761|size:637	0.00640605	95.4%:KleP1010;95.4%:KleVar41		CC-T-AC-G-G-G-A-G-GC--A-GCA-G-T-G-G-G-G-A-A--TA-TT--GC-A-C---AA-T-G-G--GC--GC-A-A--G-C--C-T-GA-T-G-C-A--GC-C--------A--T-GCC-G-C-G-T---------G-T-G--T--GA-A-G--A-A-G-G-CC----TT-CG-----------G-G-T--------T-G-T--A---AA-G-C-AC------------------------------TT-TC-A-G--C-GGG----G--A-G--G---AA--GGC-G---A-T-A--A-G--G----------T--T---------------------AA---------------------------------T---A----A-------CC-…	KleP1010	KleVar41	Klebsiella pneumoniae
>000010171|size:643	0.00639311	95.2%:SttSa536;95.2%:SttSa535		CC-T-AC-G-G-G-A-G-GC--A-GCA-G-T-A-G-G-G-A-A--TC-TT--CG-G-C---AA-T-G-G--GG--GC-A-A--C-C--C-T-GA-C-C-G-A--GC-A--------A--C-GCC-G-C-G-T---------G-A-G--T--GA-A-G--A-A-G-G-TT----TT-CG-----------G-A-T--------C-G-T--A---AA-G-C-TC------------------------------TG-TT-G-T--A-AGT----C--A-A--G---AA-CGAG-T---G-T-G--A-G--A----------G--T---------------------GG---------------------------------A---A----A-------GT-…	SttSa536	SttSa535	Streptococcus salivarius
>000008552|size:357	0.00638224	96.5%:SpnEchi8;96.5%:SpnAlpin		CC-T-AC-G-G-G-A-G-GC--A-GCA-G-T-G-G-G-G-A-A--TA-TT--GG-A-C---AA-T-G-G--GC--GA-A-A--G-C--C-T-GA-T-C-C-A--GC-A--------A--T-GCC-G-C-G-T---------G-A-G--T--GA-T-G--A-A-G-G-CC----TT-AG-----------G-G-T--------T-G-T--A---AA-G-C-TC------------------------------TT-TT-A-C--C-CGG----G--A-T--G---A-------------------------------------T---------------------AA-----------------------------------------------------…	SpnEchi8	SpnAlpin	Sphingomonas echinoides
>000002901|size:434	0.00637558	96.7%:RalPic28;96.7%:RalPic27		CC-T-AC-G-G-G-A-G-GC--A-GCA-G-T-G-G-G-G-A-A--TT-TT--GG-A-C---AA-T-G-G--GC--GA-A-A--G-C--C-T-GA-T-C-C-A--GC-A--------A--T-GCC-G-C-G-T---------G-T-G--T--GA-A-G--A-A-G-G-CC----TT-CG-----------G-G-T--------T-G-T--A---AA-G-C-AC------------------------------TT-TT-G-T--C-CGG----A--A-A--G---AA--ATG-G---C-T-C--T-G--G----------T--T---------------------AA---------------------------------T---A----C-------CT-…	RalPic28	RalPic27	Ralstonia pickettii
>000005891|size:510	0.0063671	94.1%:KleOx239;94.1%:KleOx235		CC-T-AC-G-G-G-A-G-GC--A-GCA-G-T-G-G-G-G-A-A--TA-TT--GC-A-C---AA-T-G-G--GC--GC-A-A--G-C--C-T-GA-T-G-C-A--GC-C--------A--T-GCC-G-C-G-T---------G-T-A--T--GA-A-G--A-A-G-G-CC----TT-CG-----------G-G-T--------T-G-T--A---AA-G-T-AC------------------------------TT-TC-A-G--C-GGG----G--A-G--G---AA--GGG-A---G-T-G--A-G--G----------T--T---------------------AA---------------------------------T---A----A-------CC-…	KleOx239	KleOx235	Klebsiella oxytoca
>000008371|size:480	0.00635222	96.5%:PpcDi105;96.5%:PpcDi102		CC-T-AC-G-G-G-A-G-GC--A-GCA-G-T-G-G-G-G-A-A--TA-TT--GC-A-C---AA-T-G-G--GC--GA-A-A--G-C--C-T-GA-T-G-C-A--GC-A--------A--C-GCC-G-C-G-T---------G-A-G--T--GA-T-G--A-A-G-G-CC----TT-CG-----------G-G-T--------C-G-T--A---AA-A-C-TC------------------------------TG-TC-C-T--C-AAG----G--A-A--G---A-------------------------------------T---------------------AA-----------------------------------------------------…	PpcDi105	PpcDi102	Clostridioides difficile
>000011017|size:709	0.00635067	96.9%:EnrCl486;96.9%:EnrCl470		CC-T-AA-G-G-G-A-G-GC--A-GCA-G-T-G-G-G-G-A-A--TA-TT--GC-A-C---AA-T-G-G--GC--GC-A-A--G-C--C-T-GA-T-G-C-A--GC-C--------A--T-GCC-G-C-G-T---------G-T-A--T--GA-A-G--A-A-G-G-CC----TT-CG-----------G-G-T--------T-G-T--A---AA-G-T-AC------------------------------TT-TC-A-G--C-GGG----G--A-G--G---AA--GGT-G---C-T-G--A-G--G----------T--T---------------------AA---------------------------------T---A----A-------CC-…	EnrCl486	EnrCl470	Enterobacter cloacae
>000012819|size:447	0.00633454	98.0%:ShiSon39;98.0%:Esch1638		CC-T-AC-G-G-G-A-G-GC--A-GCA-G-T-G-G-G-G-A-A--TA-TT--GC-A-C---AA-T-G-G--GC--GC-A-A--G-C--C-T-GA-T-G-C-A--GC-C--------A--T-GCC-G-C-G-T---------G-T-A--T--GA-A-G--A-A-G-G-CC----TT-CG-----------G-G-T--------T-G-T--A---AA-G-T-AC------------------------------TT-TC-A-G--C-GGG----G--A-G--G---AA--GGG-A---G-T-A--A-A--G----------T--T---------------------AA---------------------------------T---A----C-------CT-…	ShiSon39	Esch1638	Escherichia/Shigella
>000000862|size:369	0.00632071	96.6%:BifScar6;96.6%:BifScar5		CC-T-AC-G-G-G-A-G-GC--A-GCA-G-T-G-G-G-G-A-A--TA-TT--GC-A-C---AA-T-G-G--GC--GC-A-A--G-C--C-T-GA-T-G-C-A--GC-G--------A--C-GCC-G-C-G-T---------G-A-G--G--GA-T-G--G-A-G-G-CC----TT-CG-----------G-G-T--------T-G-T--A---AA-C-C-TC------------------------------TT-TT-A-G--C-AGG----G--A-G--C---AA-GG-C-------------------------------T---------------------TC---------------------------------G-------------------…	BifScar6	BifScar5	Bifidobacterium scardovii
>000013084|size:326	0.00630608	95.2%:EnrCl498;95.2%:EnrCl489		CC-T-AC-G-G-G-A-G-GC--A-GCA-G-T-A-G-G-G-A-A--TA-TT--GC-A-C---AA-T-G-G--GC--GC-A-A--G-C--C-T-GA-T-G-C-A--GC-C--------A--T-GCC-G-C-G-T---------G-T-A--T--GA-A-G--A-A-G-G-CC----TT-CG-----------G-G-T--------T-G-T--A---AA-G-T-AC------------------------------TT-TC-A-G--C-GGG----G--A-G--G---AA--GGC-G---A-C-A--G-G--G----------T--T---------------------AA---------------------------------T---A----A-------CC-…	EnrCl498	EnrCl489	Enterobacter cloacae
>000002096|size:460	0.00629684	95.2%:SttAng69;95.2%:SttAng68		CC-T-AC-G-G-G-A-G-GC--A-GCA-G-T-A-G-G-G-A-A--TC-TT--CG-G-C---AA-T-G-G--GG--GT-A-A--C-C--C-T-GA-C-C-G-A--GC-A--------A--C-GCC-G-C-G-T---------G-A-G--T--GA-A-G--A-A-G-G-TT----TT-CG-----------G-A-T--------C-G-T--A---AA-G-C-TC------------------------------TG-TT-G-T--T-AAG----G--A-A--G---AA-CGAG-T---G-T-G--A-G--A----------A--T---------------------GG---------------------------------A---A----A-------GT-…	SttAng69	SttAng68	Streptococcus anginosus
>000013646|size:408	0.00628903	96.7%:KleP1002;96.7%:KlePn925		CC-T-AA-G-G-G-A-G-GC--A-GCA-G-T-G-G-G-G-A-A--TA-TT--GC-A-C---AA-T-G-G--GC--GC-A-A--G-C--C-T-GA-T-G-C-A--GC-C--------A--T-GCC-G-C-G-T---------G-T-G--T--GA-A-G--A-A-G-G-CC----TT-CG-----------G-G-T--------T-G-T--A---AA-G-C-AC------------------------------TT-TC-A-G--C-GGG----G--A-G--G---AA--GGC-G---A-T-A--A-G--G----------T--T---------------------AA---------------------------------T---A----A-------CC-…	KleP1002	KlePn925	Klebsiella pneumoniae
>000008629|size:262	0.0062887	96.5%:GegFormi;90.5%:BJ5Varia	Faecalibacterium prausnitzii	CC-T-AC-G-G-G-A-G-GC--A-GCA-G-T-G-G-G-G-G-A--TA-TT--GC-A-C---AA-T-G-G--GG--GA-A-A--C-C--C-T-GA-T-G-C-A--GC-G--------A--C-GCC-G-C-G-T---------G-G-A--G--GA-A-G--A-A-G-G-TT----TT-CG-----------G-A-T--------T-G-T--A---AA-C-T-CC------------------------------TG-TC-G-T--T-AGG----G--A-C--G---A-------------------------------------T---------------------AA-----------------------------------------------------…	GegFormi	BJ5Varia	Faecalibacterium prausnitzii
>000009802|size:535	0.00626681	91.4%:BcsDor15;91.4%:BcsFra27		CC-T-AC-G-G-G-A-G-GC--A-GCA-G-T-G-A-G-G-A-A--TA-TT--GG-T-C---AA-T-G-G--GC--GT-T-A--G-C--C-T-GA-A-C-C-A--GC-C--------A--A-GTA-G-C-G-T---------G-A-A--G--GA-T-G--A-A-G-G-CT-C--TA-TG-----------G-G-T--------C-G-T--A---AA-C-T-TC------------------------------TT-TT-A-T--A-TAA----G--A-A--T---AA-AGTG-C---A-G-T--A------------------T---------------------GT---------------------------------A-------------------…	BcsDor15	BcsFra27	Bacteroides fragilis
>000010683|size:1013	0.00626246	95.6%:StaAu564;95.6%:EntFa534		C--T-AC-A-G-G-A-G-GC--A-GCA-G-T-A-G-G-G-A-A--TC-TT--CG-G-C---AA-T-G-G--AC--GA-A-A--G-T--C-T-GA-C-C-G-A--GC-A--------A--C-GCC-G-C-G-T---------G-A-G--T--GA-A-G--A-A-G-G-TT----TT-CG-----------G-A-T--------C-G-T--A---AA-A-C-TC------------------------------TG-TT-G-T--T-AGA----G--A-A--G---AA-CAAG-G---A-C-G--T-T--A----------G--T---------------------AA---------------------------------C--------T-------GA-…	StaAu564	EntFa534	Enterococcus faecalis
>000000897|size:377	0.00623769	96.6%:BifScar6;96.6%:BifScar5		CC-T-AC-G-G-G-A-G-GC--A-GCA-G-T-G-G-G-G-A-A--TA-TT--GC-A-C---AA-T-G-G--GC--GC-A-A--G-C--C-T-GA-T-G-C-A--GC-G--------A--C-GCC-G-C-G-T---------G-A-G--G--GA-T-G--G-A-G-G-CC----TT-CG-----------G-G-T--------T-G-T--A---AA-C-C-TC------------------------------TT-TT-A-G--C-AGG----G--A-G--C---AA-GG-C-------------------------------T---------------------TC---------------------------------G-------------------…	BifScar6	BifScar5	Bifidobacterium scardovii
>000012936|size:399	0.0062217	95.8%:KleOxy31;95.6%:KleOx242		CC-T-AA-G-G-G-A-G-GC--A-GCA-G-T-G-G-G-G-A-A--TA-TT--GC-A-C---AA-T-G-G--GC--GC-A-A--G-C--C-T-GA-T-G-C-A--GC-C--------A--T-GCC-G-C-G-T---------G-T-A--T--GA-A-G--A-A-G-G-CC----TT-CG-----------G-G-T--------T-G-T--A---AA-G-T-AC------------------------------TT-TC-A-G--C-GGG----G--A-G--G---AA--GGC-G---A-T-A--A-G--G----------T--T---------------------AA---------------------------------T---A----A-------CC-…	KleOxy31	KleOx242	Klebsiella oxytoca
>000001973|size:317	0.00621833	95.4%:AciGui12;95.4%:AciGui11		CC-T-AC-G-G-G-A-G-GC--A-GCA-G-T-G-G-G-G-A-A--TA-TT--GG-A-C---AA-T-G-G--GG--GG-A-A--C-C--C-T-GA-T-C-C-A--GC-C--------A--T-GCC-G-C-G-T---------G-T-G--T--GA-A-G--A-A-G-G-CC----TT-AT-----------G-G-T--------T-G-T--A---AA-G-C-AC------------------------------TT-TC-A-G--C-GAG----G--A-G--G---AG--GCT-C---T-C-T--T-G--G----------T--T---------------------AA---------------------------------T---A----C-------CC-…	AciGui12	AciGui11	Acinetobacter guillouiae/iwoffii
>000003535|size:506	0.00621473	93.6%:VeiPar11;93.6%:VeiTobe3		CC-T-AC-G-G-G-A-G-GC--A-GCA-G-T-G-G-G-G-A-A--TC-TT--CC-G-C---AA-T-G-G--AC--GA-A-A--G-T--C-T-GA-C-G-G-A--GC-A--------A--C-GCC-G-C-G-T---------G-A-G--T--GA-T-G--A-C-G-G-CC----TT-CG-----------G-G-T--------T-G-T--A---AA-G-C-TC------------------------------TG-TT-A-A--T-CGG----G--A-C--G---AA-AGGC-C---T-T-C--T-T--G----------C--A---------------------AA---------------------------------T---A----G-------TG-…	VeiPar11	VeiTobe3	Veillonella parvula
>000013774|size:449	0.00620317	95.1%:PpuAsac4;95.1%:PpuGross		CC-T-AC-G-G-G-A-G-GC--A-GCA-G-T-G-G-G-G-A-A--TA-TT--GC-A-C---AA-T-G-G--AG--GG-A-A--C-T--C-T-GA-T-G-C-A--GC-G--------A--C-GCC-G-C-G-T---------G-A-A--C--GA-A-G--A-A-G-G-CT----TT-CG-----------A-G-T--------C-G-T--A---AA-G-T-TC------------------------------TT-TT-A-T--A-TGG----G--A-A--G---A-------------------------------------T---------------------AA-----------------------------------------------------…	PpuAsac4	PpuGross	Peptoniphilus asaccharolyticus
>000003375|size:377	0.00617903	97.7%:CorPyru4;97.7%:CorPyru3		CC-T-AC-G-G-G-A-G-GC--A-GCA-G-T-G-G-G-G-A-A--TT-TT--GC-A-C---AA-T-G-G--GC--GG-A-A--G-C--C-T-GA-T-G-C-A--GC-G--------A--C-GCC-G-T-G-T---------G-G-G--G--GA-T-G--A-A-G-G-CC----TT-CG-----------G-G-T--------T-G-T--A---AA-C-T-CC------------------------------TT-TC-G-T--C-AGG----G--A-C--G---AA--G-T-------------------------------T---------------------TG---------------------------------T-------------------…	CorPyru4	CorPyru3	Corynebacterium pyruviciproducens
>000009059|size:248	0.00617104	96.5%:RsbInte3;96.5%:RsbInte2	Roseburia intestinalis	CC-T-AC-G-G-G-A-G-GC--A-GCA-G-T-G-G-G-G-A-A--TA-TT--GC-A-C---AA-T-G-G--GG--GA-A-A--C-C--C-T-GA-T-G-C-A--GC-G--------A--C-GCC-G-C-G-T---------G-A-G--C--GA-A-G--A-A-G-T-AT----TT-CG-----------G-T-A--------T-G-T--A---AA-G-C-TC------------------------------TA-TC-A-G--C-AGG----G--A-A--G---A----------------------------------A--G---------------------AA---------------------------------A-------------------…	RsbInte3	RsbInte2	Roseburia intestinalis
>000014699|size:790	0.00615042	95.2%:KleOx242;95.2%:KleOx241		CC-T-AC-G-G-G-A-G-GC--A-GCA-G-T-G-G-G-G-A-A--TA-TT--GC-A-C---AA-T-G-G--GC--GC-A-A--G-C--C-T-GA-T-G-C-A--GC-C--------A--T-GCC-G-C-G-T---------G-T-A--T--GA-A-G--A-A-G-G-CC----TT-CG-----------G-G-T--------T-G-T--A---AA-G-T-AC------------------------------TT-TC-A-G--C-GGG----G--A-G--G---AA--GGC-G---A-T-A--A-G--G----------T--T---------------------AA---------------------------------T---A----A-------TC-…	KleOx242	KleOx241	Klebsiella oxytoca
>000008539|size:309	0.00607732	97.7%:SpnEchi8;97.7%:SpnAlpin		CC-T-AC-G-G-G-A-G-GC--A-GCA-G-T-G-G-G-G-A-A--TA-TT--GG-A-C---AA-T-G-G--GC--GA-A-A--G-C--C-T-GA-T-C-C-A--GC-A--------A--T-GCC-G-C-G-T---------G-A-G--T--GA-T-G--A-A-G-G-CC----TT-AG-----------G-G-T--------T-G-T--A---AA-G-C-TC------------------------------TT-TT-A-C--C-CGG----G--A-T--G---A-------------------------------------T---------------------AA-----------------------------------------------------…	SpnEchi8	SpnAlpin	Sphingomonas echinoides
>000001795|size:252	0.006044	95.1%:PbdDist9;92.5%:PbdDis25		CC-T-AC-G-G-G-A-G-GC--A-GCA-G-T-G-A-G-G-A-A--TA-TT--GG-T-C---AA-T-G-G--GC--GT-A-A--G-C--C-T-GA-A-C-C-A--GC-C--------A--C-GTC-G-C-G-T---------G-A-G--G--GA-T-G--A-A-G-G-TT-C--TA-TG-----------G-A-T--------C-G-T--A---AA-C-C-TC------------------------------TT-TT-A-T--A-AGG----G--A-A--T---AA-AGTG-C---G-G-G--A------------------C---------------------GT---------------------------------G-------------------…	PbdDist9	PbdDis25	Parabacteroides distasonis
>000009308|size:430	0.00604291	90.0%:BcsFra39;90.0%:BcsFra38		CC-T-AC-G-G-G-A-G-GC--A-GCA-G-T-G-A-G-G-A-A--TA-TT--GG-T-C---AA-T-G-G--GC--GC-T-A--G-C--C-T-GA-A-C-C-A--GC-C--------A--A-GTC-G-C-G-T---------G-A-A--G--GA-T-G--A-A-G-G-CT-C--TA-TG-----------G-G-T--------C-G-T--A---AA-C-T-TC------------------------------TT-TT-A-T--A-TAA----G--A-A--T---AA-AGTG-C---A-G-T--A------------------T---------------------GT---------------------------------A-------------------…	BcsFra39	BcsFra38	Bacteroides fragilis
>000000898|size:355	0.00603737	95.2%:BifBre31;95.2%:BifBre30		CC-T-AC-G-G-G-A-G-GC--A-GCA-G-T-G-G-G-G-A-A--TA-TT--GC-A-C---AA-T-G-G--GC--GC-A-A--G-C--C-T-GA-T-G-C-A--GC-G--------A--C-GCC-G-C-G-T---------G-A-G--G--GA-T-G--G-A-G-G-CC----TT-CG-----------G-G-T--------T-G-T--A---AA-C-C-TC------------------------------TT-TT-A-T--C-AGG----G--A-G--C---AA-GG-C-------------------------------T---------------------TC---------------------------------G-------------------…	BifBre31	BifBre30	Bifidobacterium breve
>000006212|size:453	0.0060297	97.7%:BifScar6;97.7%:BifScar5		CC-T-AC-G-G-G-A-G-GC--A-GCA-G-T-G-G-G-G-A-A--TA-TT--GC-A-C---AA-T-G-G--GC--GC-A-A--G-C--C-T-GA-T-G-C-A--GC-G--------A--C-GCC-G-C-G-T---------G-A-G--G--GA-T-G--G-A-G-G-CC----TT-CG-----------G-G-T--------T-G-T--A---AA-C-C-TC------------------------------TT-TT-A-G--C-AGG----G--A-G--C---AA-GG-C-------------------------------T---------------------TC---------------------------------G-------------------…	BifScar6	BifScar5	Bifidobacterium scardovii
>000010801|size:530	0.00602534	95.8%:StaAu564;95.8%:EntFa534		C--T-AA-G-G-G-A-G-GC--A-GCA-G-T-A-G-G-G-A-A--TC-TT--CG-G-C---AA-T-G-G--AC--GA-A-A--G-T--C-T-GA-C-C-G-A--GC-A--------A--C-GCC-G-C-G-T---------G-A-G--T--GA-A-G--A-A-G-G-TT----TT-CG-----------G-A-T--------C-G-T--A---AA-A-C-TC------------------------------TG-TT-G-T--T-AGA----G--A-A--G---AA-CAAG-G---A-C-G--T-T--A----------G--T---------------------AA---------------------------------C--------T-------GA-…	StaAu564	EntFa534	Enterococcus faecalis
>000013228|size:341	0.00599536	95.2%:EnrCl498;95.2%:EnrCl489		CC-T-AC-G-G-G-A-G-GC--A-GCA-G-T-G-G-G-G-A-A--TA-TT--GC-A-C---AA-T-G-G--GC--GC-A-A--G-C--C-T-GA-T-G-C-A--GC-C--------A--T-GCC-G-C-G-T---------G-T-A--T--GA-A-G--A-A-G-G-CC----TT-CG-----------G-G-T--------T-G-T--A---AA-G-T-AC------------------------------TT-TC-A-G--C-GGG----G--A-G--G---AA--GGC-G---A-C-A--G-G--G----------T--T---------------------AA---------------------------------T---A----A-------CC-…	EnrCl498	EnrCl489	Enterobacter cloacae
>000011201|size:412	0.00595961	96.7%:StaWar47;96.7%:AciBa511		CC-T-AC-G-G-G-A-G-GC--A-GCA-G-T-A-G-G-G-A-A--TC-TT--CC-G-C---AA-T-G-G--GC--GA-A-A--G-C--C-T-GA-C-G-G-A--GC-A--------A--C-GCC-G-C-G-T---------G-A-G--T--GA-T-G--A-A-G-G-TC----TT-CG-----------G-A-T--------C-G-T--A---AA-A-C-TC------------------------------TG-TT-A-T--C-AGG----G--A-A--G---AA-CAAA-T---G-T-G--T-A--A----------G--T---------------------AA---------------------------------C--------T-------GT-…	StaWar47	AciBa511	Staphylococcus warneri
>000008667|size:268	0.00594108	88.2%:FaePrau5;77.7%:GegFormi		CC-T-AC-G-G-G-A-G-GC--A-GCA-G-T-G-G-G-G-G-A--TA-TT--GC-A-C---AA-T-G-G--GG--GA-A-A--C-C--C-T-GA-T-G-C-A--GC-G--------A--C-GCC-G-C-G-T---------G-G-A--G--GA-A-G--A-A-G-G-TT----TT-CG-----------G-A-T--------T-G-T--A---AA-C-T-CC------------------------------TG-TC-G-T--T-AGG----G--A-C--G---A-------------------------------------T---------------------AA-----------------------------------------------------…	FaePrau5	GegFormi	Faecalibacterium prausnitzii
>000007839|size:409	0.005923	94.9%:PpuHarei;92.1%:PpuRhini		CC-T-AC-G-G-G-A-G-GC--A-GCA-G-T-G-G-G-G-A-A--TA-TT--GC-A-C---AA-T-G-G--AG--GG-A-A--C-T--C-T-GA-T-G-C-A--GC-G--------A--C-GCC-G-C-G-T---------G-A-A--C--GA-T-G--A-A-G-G-CT----TT-CG-----------A-G-T--------C-G-T--A---AA-G-T-TC------------------------------TT-TT-A-T--A-TGG----G--A-A--G---A-------------------------------------T---------------------AA-----------------------------------------------------…	PpuHarei	PpuRhini	Peptoniphilus harei
>000010544|size:765	0.00592255	88.4%:EntFa535;86.8%:StaAu564	Enterococcus faecalis	CC-T-AC-G-G-G-A-G-GC--A-GCA-G-T-A-G-G-G-A-A--TC-TT--CG-G-C---AA-T-G-G--AC--GA-A-A--G-T--C-T-GA-C-C-G-A--GC-A--------A--C-GCC-G-C-G-T---------G-A-G--T--GA-A-G--A-A-G-G-TT----TT-CG-----------G-A-T--------C-G-T--A---AA-A-C-TC------------------------------TG-TT-G-T--T-AGA----G--A-A--G---AA-CAAG-G---A-C-G--T-T--A----------G--T---------------------AA---------------------------------C--------T-------GA-…	EntFa535	StaAu564	Enterococcus faecalis
>000011154|size:257	0.00591182	95.4%:StaWar47;95.4%:AciBa511		CC-T-AC-G-G-G-A-G-GC--A-GCA-G-T-A-G-G-G-A-A--TC-TT--CC-G-C---AA-T-G-G--GC--GA-A-A--G-C--C-T-GA-C-G-G-A--GC-A--------A--C-GCC-G-C-G-T---------G-A-G--T--GA-T-G--A-A-G-G-TC----TT-CG-----------G-A-T--------C-G-T--A---AA-A-C-TC------------------------------TG-TT-A-T--C-AGG----G--A-A--G---AA-CAAA-T---G-T-G--T-A--A----------G--T---------------------AA---------------------------------C--------T-------GT-…	StaWar47	AciBa511	Staphylococcus warneri
>000008178|size:230	0.00588083	89.6%:Ti4Tric5;89.6%:FaePrau4	Faecalibacterium prausnitzii	CC-T-AC-G-G-G-A-G-GC--A-GCA-G-T-G-G-G-G-A-A--TA-TT--GC-A-C---AA-T-G-G--GG--GA-A-A--C-C--C-T-GA-T-G-C-A--GC-G--------A--C-GCC-G-C-G-T---------G-G-A--G--GA-A-G--A-A-G-G-TC----TT-CG-----------G-A-T--------T-G-T--A---AA-C-T-CC------------------------------TG-TT-G-T--T-GAG----G--A-A--G---A-------------------------------------T---------------------AA-----------------------------------------------------…	Ti4Tric5	FaePrau4	Faecalibacterium prausnitzii
>000010587|size:428	0.00586508	95.2%:StaAu564;95.2%:EntFa534		CC-T-AC-G-G-G-A-G-GC--A-GCA-G-T-A-G-G-G-A-A--TC-TT--CG-G-C---AA-T-G-G--AC--GA-A-A--G-T--C-T-GA-C-C-G-A--GC-A--------A--C-GCC-G-C-G-T---------G-A-G--T--GA-A-G--A-A-G-G-TT----TT-CG-----------G-A-T--------C-G-T--A---AA-A-C-TC------------------------------TG-TT-G-T--T-AGA----G--A-A--G---AA-CAAG-G---A-C-G--T-T--A----------G--T---------------------AA---------------------------------C--------T-------GA-…	StaAu564	EntFa534	Enterococcus faecalis
>000009708|size:258	0.00586014	92.0%:BcsFra39;92.0%:BcsFra38		CC-T-AC-G-G-G-A-G-GC--A-GCA-G-T-G-A-G-G-A-A--TA-TT--GG-T-C---AA-T-G-G--GC--GC-T-A--G-C--C-T-GA-C-C-C-A--GC-C--------A--C-GTC-G-C-G-T---------G-A-A--G--GA-T-G--A-A-G-G-CT-C--TA-TG-----------G-G-T--------C-G-T--A---AA-C-T-TC------------------------------TT-TT-A-T--A-TAA----G--A-A--T---AA-AGTG-C---A-G-T--A------------------T---------------------GT---------------------------------A-------------------…	BcsFra39	BcsFra38	Bacteroides fragilis
>000008662|size:233	0.00584671	91.0%:Cu9Eutac;91.0%:Cu9Spec2	Coprococcus eutactus	CC-T-AC-G-G-G-A-G-GC--A-GCA-G-T-G-G-G-G-A-A--TA-TT--GC-A-C---AA-T-G-G--GG--GA-A-A--C-C--C-T-GA-T-G-C-A--GC-G--------A--C-GCC-G-C-G-T---------G-A-G--T--GA-T-G--A-A-G-T-AT----TT-CG-----------G-T-A--------T-G-T--A---AA-G-C-TC------------------------------TA-TC-A-G--C-AGG----G--A-A--G---A-------------------------------------T---------------------AA-----------------------------------------------------…	Cu9Eutac	Cu9Spec2	Coprococcus eutactus
>000005903|size:306	0.00584541	96.9%:EscFer15;96.7%:ShiSon39		CC-T-AT-G-G-G-A-G-GC--A-GCA-G-T-G-G-G-G-A-A--TA-TT--GC-A-C---AA-T-G-G--GC--GC-A-A--G-C--C-T-GA-T-G-C-A--GC-C--------A--T-GCC-G-C-G-T---------G-T-A--T--GA-A-G--A-A-G-G-CC----TT-CG-----------G-G-T--------T-G-T--A---AA-G-T-AC------------------------------TT-TC-A-G--C-GGG----G--A-G--G---AA--GGG-A---G-T-A--A-A--G----------T--T---------------------AA---------------------------------T---A----C-------CT-…	EscFer15	ShiSon39	Enterococcus faecium
>000002184|size:483	0.00583456	97.1%:CrvLanc2;97.1%:CrvLance		CC-T-AC-G-G-G-A-G-GC--A-GCA-G-T-G-G-G-G-A-A--TT-TT--GG-A-C---AA-T-G-G--GC--GA-A-A--G-C--C-T-GA-T-C-C-A--GC-C--------A--T-GCC-G-C-G-T---------G-C-A--G--GA-T-G--A-A-G-G-CC----TT-CG-----------G-G-T--------T-G-T--A---AA-C-T-GC------------------------------TT-TT-G-T--A-CGG----A--A-C--G---AA--AAG-G---T-T-T--G-G--C----------C--T---------------------AA---------------------------------T---A----A-------GC-…	CrvLanc2	CrvLance	Curvibacter lanceolatus
>000003556|size:552	0.00581935	95.2%:VeiTobe3;95.2%:VeiTobe2		CC-T-AC-G-G-G-A-G-GC--A-GCA-G-T-G-G-G-G-A-A--TC-TT--CC-G-C---AA-T-G-G--AC--GA-A-A--G-T--C-T-GA-C-G-G-A--GC-A--------A--C-GCC-G-C-G-T---------G-A-G--T--GA-T-G--A-C-G-G-CC----TT-CG-----------G-G-T--------T-G-T--A---AA-G-C-TC------------------------------TG-TT-A-A--T-CGG----G--A-C--G---AA-AGGC-C---T-T-C--T-T--G----------C--G---------------------AA---------------------------------T---A----G-------TG-…	VeiTobe3	VeiTobe2	Veillonella parvula
>000003381|size:295	0.00580274	95.0%:CorPyru4;95.0%:CorPyru3		CC-T-AC-G-G-G-A-G-GC--A-GCA-G-T-G-G-G-G-A-A--TT-TT--GC-A-C---AA-T-G-G--GC--GG-A-A--G-C--C-T-GA-T-G-C-A--GC-G--------A--C-GCC-G-T-G-T---------G-G-G--G--GA-T-G--A-A-G-G-CC----TT-CG-----------G-G-T--------T-G-T--A---AA-C-T-CC------------------------------TT-TC-G-T--C-AGG----G--A-C--G---AA--G-T-------------------------------T---------------------TG---------------------------------T-------------------…	CorPyru4	CorPyru3	Corynebacterium pyruviciproducens
[truncated: 990 more rows]

## Sheet: OTU abundances (%) & ID
Abundance	4.31887	9.12	3.78737	0.939706	3.7392	3.43704	2.76098	0.109559	2.23606	1.38772	1.84917	1.64114	1.35127	0.34341	2.02557	1.07309	0.953361	0.940851	1.26394	0.728591	0.668607	0.684744	1.12892	0.581618	0.678563	0.91331	0.701688	0.839845	0.373722	0.711211	0.746316	0.421623	0.49805	0.566996	0.54144	0.501062	0.50436	0.323504	0.458785	0.0175241	0.457067	0.624565	0.670901	0.454436	0.493097	0.46687	0.430583	0.364313	0.338942
[truncated: 145 more rows]
[truncated: 1,716 more columns]

## Sheet: OTU-combined-species
Order	Name Blast	Miseq run & sample number	Sample ID	Seq. ID	Staphylococcus epidermidis	Enterobacter cloacae	Escherichia/Shigella	Klebsiella oxytoca	Klebsiella pneumoniae	Enterococcus faecalis	Undibacterium oligocarboniphilum	Clostridium perfringens	Bacteroides fragilis	Acinetobacter guillouiae/iwoffii	Bifidobacterium longum subsp. Infantis	Clostridium paraputrificum	Clostridioides difficile	Streptococcus salivarius	Staphylococcus warneri	Staphylococcus aureus	Corynebacterium tuberculostearicum	Curvibacter lanceolatus	Staphylococcus haemolyticus	Bifidobacterium scardovii	Ureaplasma parvum/urealyticum	Bacteroides vulgatus	Bacteroides dorei	Clostridium perfringens	Citrobacter freundii	Streptococcus anginosus	Parabacteroides distasonis	Clostridium tertium	Sphingomonas echinoides	Veillonella parvula	Raoultella ornithinolytica	Pantoea agglomerans	Enterococcus faecium	Bifidobacterium dentium	Finegoldia magna	Pantoea calida	Corynebacterium pyruviciproducens	Staphylococcus lugdunensis	Veillonella dispar	Anaerococcus provencensis	Lactobacillus animalis	Actinomyces neuii	Peptoniphilus harei	Pantoea septica	Corynebacterium simulans
[truncated: 142 more rows]
[truncated: 86 more columns]

[truncated: 2 more sheets: Contamination cor. annalysis, Postcleaning & metadata]
